# Supplementary material for: Genetic Subtraction Profiling Identifies Candidate miRNAs Involved in Rice Female Gametophyte Abortion
Source: G3 (Bethesda). 2017 May 19;7(7):2281–93. doi: 10.1534/g3.117.040808 (PMC5499135; doi:10.1534/g3.117.040808)
Supplement: Supplementary file 3 [file 2281TableS1.xlsx]

## Sheet: Sheet1
		Table S1 Primers used for stem-loop RT-PCR and qRT-PCR.
		miRNA ID	Primer sequences(5'-3')
		osa-miR535-5p-RT	GTCGTATCCAGTGCAGGGTCCGAGGTATTCGCACTGGATACGACGCGTGC
		osa-miR535-5p-F	GCCGCTTGACAACGAGAGAGA
		osa-miR166d-3p-RT	GTCGTATCCAGTGCAGGGTCCGAGGTATTCGCACTGGATACGACGGGGAA
		osa-miR166d-3p-F	GCCGCTTCGGACCAGGCTTCA
		osa-miR1425-3p-RT	GTCGTATCCAGTGCAGGGTCCGAGGTATTCGCACTGGATACGACATTAAG
		osa-miR1425-3p-F	GCCGCTCAGCAAGAACTGGAT
		osa-miR5825-RT	GTCGTATCCAGTGCAGGGTCCGAGGTATTCGCACTGGATACGACCCGTTT
		osa-miR5825-F	GCCGCTAAAACATCTGATAACCTG
		osa-miR5794-RT	GTCGTATCCAGTGCAGGGTCCGAGGTATTCGCACTGGATACGACACGACT
		osa-miR5794-F	GCCGCTTGAGGAATCACTAGT
		osa-miR167b-RT	GTCGTATCCAGTGCAGGGTCCGAGGTATTCGCACTGGATACGACTAGATC
		osa-miR167b-F	GCCGCTTGAAGCTGCCAGCAT
		primer mir_31-RT	GTCGTATCCAGTGCAGGGTCCGAGGTATTCGCACTGGATACGACGAGCCT
		primer mir_31-F	GCCGCTACTTTCATGGAAGAT
		primer mir_90-RT	GTCGTATCCAGTGCAGGGTCCGAGGTATTCGCACTGGATACGACGCAGCC
		primer mir_90-F	GCCGCTTGGCTGTGATGATTT
		primer mir_98-RT	GTCGTATCCAGTGCAGGGTCCGAGGTATTCGCACTGGATACGACATGCTG
		primer mir_98-F	GCCGCTCCAATCTAGGACTGG
		primer mir_9-RT	GTCGTATCCAGTGCAGGGTCCGAGGTATTCGCACTGGATACGACTTGTGC
		primer mir_9-F	GCCGCTTTAATCGTCGATCAG
		U6-RT	ATTTGGACCATTTCTCGATTTGT
		U6-F	CGATAAAATTGGAACGATACAGA
		Universal Reverse Primer	GTGCAGGGTCCGAGGT
