# Supplementary material for: Genetic Subtraction Profiling Identifies Candidate miRNAs Involved in Rice Female Gametophyte Abortion
Source: G3 (Bethesda). 2017 May 19;7(7):2281–93. doi: 10.1534/g3.117.040808 (PMC5499135; doi:10.1534/g3.117.040808)
Supplement: Supplementary file 4 [file 2281TableS2.xlsx]

## Sheet: Sheet1
	Table S2 All known miRNAs detected in this study. The expression levels of all miRNAs were also shown in this table.
	miR_name	A1	A2	A3	B1	B2	B3
	osa-miR156d	115080	44846	81528	140019	97206	81572
	osa-miR156f-5p	115012	44823	81485	139962	97164	81523
	osa-miR156h-5p	115012	44823	81485	139962	97164	81523
	osa-miR156j-5p	115012	44822	81483	139959	97159	81522
	osa-miR156b-5p	91250	36176	67138	116263	82717	66440
	osa-miR156c-5p	91244	36176	67138	116249	82714	66432
	osa-miR156g-5p	91243	36177	67140	116252	82719	66433
	osa-miR156a	91214	36162	67101	116220	82684	66404
	osa-miR156e	91214	36162	67101	116220	82684	66404
	osa-miR156i	91214	36162	67101	116220	82684	66404
	osa-miR167a-5p	87843	50415	52121	68170	74754	49080
	osa-miR167c-5p	87837	50414	52120	68169	74754	49078
	osa-miR167b	87411	50210	51968	67909	74519	48916
	osa-miR166d-3p	63062	43129	66201	61193	73033	64589
	osa-miR166a-3p	63061	43127	66197	61194	73033	64589
	osa-miR166f	63034	43110	66182	61170	73015	64571
	osa-miR166b-3p	63015	43114	66171	61176	73013	64561
	osa-miR166j-3p	62988	43092	66142	61153	72987	64535
	osa-miR166c-3p	62955	43086	66126	61131	72976	64521
	osa-miR166g-3p	29717	15514	12338	40704	26566	15642
	osa-miR166h-3p	29647	15478	12279	40629	26516	15591
	osa-miR168a-5p	28729	11915	11455	41291	18627	11395
	osa-miR167g	23019	27945	25750	17885	32986	23253
	osa-miR167d-5p	22965	27861	25701	17847	32938	23203
	osa-miR167h-5p	22964	27861	25699	17847	32936	23203
	osa-miR167f	22963	27862	25698	17846	32934	23202
	osa-miR167j	22963	27861	25700	17845	32936	23201
	osa-miR166l-3p	14748	8212	8764	22074	13072	9741
	osa-miR166k-3p	14608	8107	8654	21946	12953	9622
	osa-miR535-5p	13242	6773	6467	10137	8887	6482
	osa-miR5794	2556	3433	4847	4533	5756	4539
	osa-miR167e-5p	1874	809	772	1455	1470	751
	osa-miR167i-5p	1874	808	772	1454	1470	750
	osa-miR5497	1095	310	116	2938	704	248
	osa-miR5144-5p	1010	488	511	864	724	545
	osa-miR444c.2	975	678	848	940	925	943
	osa-miR444b.2	969	670	841	932	926	934
	osa-miR159a.1	825	202	567	787	337	327
	osa-miR159b	825	202	567	787	337	327
	osa-miR528-5p	703	318	355	1045	5766	589
	osa-miR390-5p	670	420	615	1116	830	655
	osa-miR820a	587	555	966	443	537	860
	osa-miR820b	587	555	966	443	537	860
	osa-miR820c	587	555	966	443	537	860
	osa-miR5825	528	710	545	454	732	553
	osa-miR166m	528	242	372	556	507	381
	osa-miR156k	503	235	300	577	505	289
	osa-miR1425-3p	479	233	342	327	334	275
	osa-miR5487	469	157	36	1214	253	65
	osa-miR444a-3p.2	467	319	347	363	510	468
	osa-miR444e	463	314	346	358	504	466
	osa-miR159a.2	461	3	5	283	72	7
	osa-miR444d.2	447	310	336	349	496	462
	osa-miR1850.1	440	190	210	655	288	187
	osa-miR5806	429	127	64	1025	231	71
	osa-miR167a-3p	417	157	136	133	134	132
	osa-miR1425-5p	337	32	122	283	209	157
	osa-miR815b	333	171	175	380	197	186
	osa-miR444a-5p	304	158	211	326	254	211
	osa-miR171b	239	215	206	225	265	252
	osa-miR171c-3p	239	215	206	225	265	252
	osa-miR171f-3p	231	201	197	208	255	232
	osa-miR171d-3p	230	201	197	209	257	231
	osa-miR171e-3p	230	201	197	209	257	231
	osa-miR160e-5p	224	14	50	199	142	61
	osa-miR3980a-5p	220	96	92	165	128	101
	osa-miR3980b-5p	220	96	92	165	128	101
	osa-miR818d	206	133	170	220	204	152
	osa-miR815c	206	95	118	264	130	117
	osa-miR5793	196	65	20	672	128	32
	osa-miR2101-3p	192	165	235	154	189	195
	osa-miR5486	192	68	41	840	199	58
	osa-miR5536	184	101	72	202	135	90
	osa-miR5148c	168	186	157	197	182	140
	osa-miR5148b	167	186	157	196	182	140
	osa-miR5148a	162	179	148	189	172	134
	osa-miR172b	162	82	80	122	148	104
	osa-miR160d-5p	159	3	12	144	54	17
	osa-miR394	159	0	6	187	97	26
	osa-miR160a-5p	156	3	12	139	51	17
	osa-miR160b-5p	156	3	12	139	51	17
	osa-miR160c-5p	156	3	12	139	51	17
	osa-miR1429-5p	154	139	114	110	130	101
	osa-miR1870-5p	154	126	290	162	140	196
	osa-miR2055	125	42	45	83	59	54
	osa-miR171i-3p	123	61	26	211	72	42
	osa-miR171c-5p	120	53	37	55	36	17
	osa-miR396e-5p	118	37	27	197	52	43
	osa-miR396f-5p	118	37	27	197	52	43
	osa-miR5179	116	115	143	43	95	105
	osa-miR531a	112	18	42	105	63	45
	osa-miR531b	112	18	42	105	63	45
	osa-miR531c	112	18	42	105	63	45
	osa-miR5153	110	99	96	116	107	79
	osa-miR815a	110	55	51	142	64	52
	osa-miR2095-5p	105	79	94	80	123	81
	osa-miR812e	104	68	58	122	79	44
	osa-miR812c	104	68	56	120	79	44
	osa-miR5801	103	75	52	88	51	63
	osa-miR5802	101	58	40	109	47	51
	osa-miR1432-5p	93	2	7	16	4	2
	osa-miR2121a	92	56	58	84	52	59
	osa-miR164a	92	29	20	206	39	14
	osa-miR164b	92	29	20	206	39	14
	osa-miR164f	92	29	20	206	39	14
	osa-miR812k	91	101	295	151	131	221
	osa-miR812m	89	101	292	149	132	220
	osa-miR2121b	87	53	51	77	55	58
	osa-miR171e-5p	87	41	44	98	56	36
	osa-miR812l	86	101	295	146	130	220
	osa-miR319b	86	7	9	78	18	4
	osa-miR439a	85	50	76	71	66	67
	osa-miR439c	85	50	76	71	66	67
	osa-miR439e	85	50	76	71	66	67
	osa-miR439f	85	50	76	71	66	67
	osa-miR439h	85	50	76	71	66	67
	osa-miR444b.1	83	27	34	66	44	49
	osa-miR444c.1	83	27	34	66	44	49
	osa-miR166i-3p	79	73	84	80	118	83
	osa-miR166d-5p	78	41	66	60	54	55
	osa-miR5145	76	37	48	73	67	47
	osa-miR1862d	74	44	102	72	53	88
	osa-miR1846e	72	18	12	34	31	26
	osa-miR162b	70	39	68	77	74	69
	osa-miR5792	62	9	3	231	13	5
	osa-miR1862e	60	80	149	66	71	108
	osa-miR2867-3p	60	15	32	57	31	19
	osa-miR5150-5p	58	36	106	65	54	74
	osa-miR812a	58	35	37	66	38	25
	osa-miR5813	57	20	25	35	30	28
	osa-miR812v	55	31	22	44	36	28
	osa-miR390-3p	53	34	48	77	58	45
	osa-miR319a-3p	48	13	5	78	17	3
	osa-miR1423-5p	47	24	67	54	32	68
	osa-miR169c	44	20	61	58	33	45
	osa-miR169b	43	21	60	57	32	42
	osa-miR5800	41	3	8	154	28	11
	osa-miR5144-3p	40	22	8	31	24	17
	osa-miR2093-5p	39	46	50	42	55	59
	osa-miR1860-3p	39	24	22	30	25	13
	osa-miR166b-5p	37	15	22	57	19	21
	osa-miR172a	37	10	2	78	18	6
	osa-miR172d-3p	37	10	2	78	18	6
	osa-miR5519	36	9	5	117	33	9
	osa-miR166h-5p	35	15	4	104	31	11
	osa-miR439g	34	30	32	41	29	22
	osa-miR5791	34	2	0	125	3	0
	osa-miR439d	33	30	33	42	29	21
	osa-miR812b	33	27	23	37	30	15
	osa-miR1872	32	22	31	38	39	27
	osa-miR529a	32	22	14	36	31	10
	osa-miR812u	30	21	26	42	17	26
	osa-miR164c	30	14	2	31	13	3
	osa-miR5499	30	11	2	121	25	7
	osa-miR1846a-5p	29	6	15	9	11	7
	osa-miR1846b-5p	29	6	15	9	11	7
	osa-miR812n-3p	28	22	24	42	18	28
	osa-miR156l-5p	28	0	3	12	1	1
	osa-miR5146	27	21	6	23	12	9
	osa-miR408-5p	27	20	18	55	125	32
	osa-miR169a	27	15	30	36	11	17
	osa-miR812o-3p	26	11	10	17	11	9
	osa-miR2873b	26	6	20	15	26	18
	osa-miR162a	25	34	54	55	30	40
	osa-miR812p	25	20	9	38	26	22
	osa-miR1862a	25	14	13	31	25	10
	osa-miR5083	25	3	4	18	4	9
	osa-miR1875	24	27	18	71	46	15
	osa-miR1862b	24	14	13	31	23	10
	osa-miR1860-5p	24	6	5	16	16	6
	osa-miR396c-5p	24	2	6	28	7	3
	osa-miR1862c	23	13	12	31	22	8
	osa-miR1868	22	23	57	27	13	36
	osa-miR812t	22	14	22	39	12	23
	osa-miR1427	22	8	10	14	13	10
	osa-miR5491	22	6	7	102	10	6
	osa-miR5513	21	11	14	32	17	14
	osa-miR812s	21	9	12	11	6	6
	osa-miR396a-5p	21	4	9	13	3	1
	osa-miR396b-5p	21	4	9	13	3	1
	osa-miR5161	21	3	5	19	11	3
	osa-miR812h	20	19	17	41	24	14
	osa-miR6254	20	10	11	17	16	15
	osa-miR168a-3p	20	9	4	24	9	5
	osa-miR812i	19	18	14	41	23	13
	osa-miR1846a-3p	19	3	7	14	9	10
	osa-miR5501	18	13	6	16	18	10
	osa-miR818b	18	12	7	18	14	7
	osa-miR444d.3	18	6	8	8	8	6
	osa-miR5490	18	5	2	40	9	9
	osa-miR396c-3p	18	4	2	26	7	4
	osa-miR2101-5p	17	22	30	19	24	25
	osa-miR2871a-5p	17	17	15	18	11	11
	osa-miR812j	17	15	15	40	24	11
	osa-miR818e	17	12	7	18	14	7
	osa-miR5503	17	9	4	33	10	6
	osa-miR5821	17	4	6	8	10	5
	osa-miR6253	17	2	3	3	2	14
	osa-miR5512a	16	8	3	21	5	4
	osa-miR5512b	16	8	3	21	5	4
	osa-miR1319b	16	5	5	23	17	5
	osa-miR5508	16	2	7	25	5	3
	osa-miR812d	15	12	15	21	12	7
	osa-miR2093-3p	15	12	11	6	15	15
	osa-miR5150-3p	15	6	16	19	4	4
	osa-miR6250	15	4	5	5	0	7
	osa-miR160a-3p	15	4	4	18	15	6
	osa-miR160b-3p	15	4	4	18	15	6
	osa-miR5540	14	10	6	9	11	9
	osa-miR5817	14	10	4	22	3	5
	osa-miR5808	14	7	7	24	15	12
	osa-miR1874-3p	13	8	12	24	5	4
	osa-miR812g	12	14	12	29	16	10
	osa-miR1846d-5p	12	11	15	13	12	10
	osa-miR5498	12	8	4	17	9	8
	osa-miR2871a-3p	12	5	10	16	11	15
	osa-miR2871b	12	5	10	16	11	15
	osa-miR5834	12	5	2	27	10	2
	osa-miR535-3p	12	4	4	9	5	6
	osa-miR159f	12	1	0	17	1	1
	osa-miR5505	12	0	1	11	12	4
	osa-miR5799	11	11	6	11	5	7
	osa-miR1852	11	3	5	3	3	3
	osa-miR1436	11	2	5	12	5	6
	osa-miR160d-3p	11	1	2	10	8	1
	osa-miR5516a	11	1	0	35	4	0
	osa-miR5516b	11	1	0	35	4	0
	osa-miR5818	11	0	1	37	3	3
	osa-miR5816	10	12	12	5	12	9
	osa-miR818c	10	5	4	4	2	3
	osa-miR1850.2	10	5	4	2	4	3
	osa-miR160e-3p	10	4	3	4	12	6
	osa-miR444f	10	2	10	15	16	11
	osa-miR1440b	10	2	2	12	8	6
	osa-miR1849	10	1	1	3	1	6
	osa-miR166e-3p	9	80	142	12	128	117
	osa-miR5154	9	8	10	15	13	8
	osa-miR5506	9	7	0	71	8	1
	osa-miR5526	9	6	4	10	5	2
	osa-miR5074	9	4	2	1	9	3
	osa-miR1881	9	4	0	8	3	3
	osa-miR1847.1	9	1	2	2	2	0
	osa-miR818a	8	5	4	3	1	3
	osa-miR5815	8	3	9	8	6	1
	osa-miR6255	8	3	4	7	0	6
	osa-miR397a	8	3	3	6	6	4
	osa-miR5504	8	2	1	20	4	3
	osa-miR5532	8	2	1	6	2	0
	osa-miR5529	8	0	0	8	3	0
	osa-miR5082	8	0	0	5	0	2
	osa-miR810b.1	7	5	7	5	3	4
	osa-miR5502	7	5	3	4	4	3
	osa-miR440	7	4	4	5	5	5
	osa-miR812f	7	3	7	14	8	0
	osa-miR435	7	3	6	8	7	3
	osa-miR5151	7	3	5	8	7	7
	osa-miR5492	7	3	0	10	9	2
	osa-miR164d	7	2	8	15	1	5
	osa-miR5076	7	2	1	16	8	5
	osa-miR166k-5p	7	1	2	40	9	1
	osa-miR1857-5p	7	0	2	1	1	0
	osa-miR171d-5p	7	0	1	10	3	1
	osa-miR396a-3p	7	0	1	6	1	2
	osa-miR396b-3p	7	0	1	6	1	2
	osa-miR5518	7	0	0	9	5	0
	osa-miR166a-5p	6	6	3	10	9	4
	osa-miR7692-3p	6	4	5	4	6	3
	osa-miR156j-3p	6	2	3	1	2	3
	osa-miR408-3p	6	1	4	3	17	3
	osa-miR2098-3p	6	1	1	9	3	6
	osa-miR171i-5p	5	4	0	9	2	0
	osa-miR1879	5	3	4	11	2	3
	osa-miR5528	5	3	0	19	4	3
	osa-miR5837.2	5	2	0	13	1	0
	osa-miR5833	5	1	1	1	3	3
	osa-miR5496	5	1	0	12	2	3
	osa-miR1846c-5p	5	0	1	4	0	0
	osa-miR1857-3p	5	0	0	1	1	0
	osa-miR2118b	4	16	2	7	10	8
	osa-miR2118n	4	16	2	7	10	8
	osa-miR2863c	4	10	29	5	2	17
	osa-miR1851	4	7	6	3	4	3
	osa-miR1863c	4	6	13	4	4	6
	osa-miR5538	4	6	3	18	0	1
	osa-miR169e	4	5	0	5	5	3
	osa-miR166e-5p	4	4	3	7	7	2
	osa-miR5521	4	4	2	28	4	5
	osa-miR1319a	4	4	2	11	5	5
	osa-miR166l-5p	4	3	3	5	4	1
	osa-miR2865	4	3	0	4	1	7
	osa-miR1431	4	1	2	4	1	2
	osa-miR2864.2	4	1	1	1	1	2
	osa-miR396g	4	0	2	1	0	0
	osa-miR396h	4	0	2	1	0	0
	osa-miR5789	4	0	1	5	2	0
	osa-miR3979-5p	4	0	0	8	1	0
	osa-miR5509	4	0	0	8	0	0
	osa-miR5824	4	0	0	3	2	1
	osa-miR396d	4	0	0	1	0	0
	osa-miR2094-5p	3	8	2	3	3	7
	osa-miR6249a	3	7	4	3	9	2
	osa-miR6249b	3	7	4	3	9	2
	osa-miR1864	3	5	5	7	9	3
	osa-miR5340	3	4	9	5	5	4
	osa-miR171a	3	3	4	5	1	4
	osa-miR1863b.2	3	2	16	6	4	9
	osa-miR3980a-3p	3	2	14	19	9	10
	osa-miR3980b-3p	3	2	14	19	9	10
	osa-miR167e-3p	3	2	3	4	1	4
	osa-miR167i-3p	3	2	3	4	1	4
	osa-miR1846d-3p	3	2	2	3	2	1
	osa-miR2880	3	2	2	1	3	6
	osa-miR2863b	3	2	0	3	4	1
	osa-miR399j	3	2	0	3	1	0
	osa-miR812o-5p	3	2	0	2	1	2
	osa-miR5339	3	2	0	2	1	0
	osa-miR167h-3p	3	1	6	3	0	1
	osa-miR2120	3	1	1	3	2	1
	osa-miR164e	3	0	1	2	0	1
	osa-miR2275d	3	0	0	8	0	0
	osa-miR172d-5p	3	0	0	3	0	0
	osa-miR393b-3p	3	0	0	1	0	0
	osa-miR6247	3	0	0	0	0	0
	osa-miR2095-3p	2	5	2	5	0	0
	osa-miR167c-3p	2	3	0	7	4	0
	osa-miR2118h	2	3	0	3	4	0
	osa-miR2118k	2	3	0	3	4	0
	osa-miR5788	2	3	0	2	2	0
	osa-miR814c	2	2	1	5	0	1
	osa-miR814b	2	2	0	10	4	1
	osa-miR814a	2	2	0	8	3	1
	osa-miR529b	2	2	0	7	5	0
	osa-miR397b	2	1	4	4	11	4
	osa-miR5539a	2	1	3	5	3	2
	osa-miR5539b	2	1	3	5	3	2
	osa-miR5500	2	1	1	3	2	2
	osa-miR156c-3p	2	1	1	1	1	0
	osa-miR156g-3p	2	1	1	1	1	0
	osa-miR396f-3p	2	1	0	5	2	0
	osa-miR5829	2	1	0	1	4	5
	osa-miR5534a	2	1	0	1	1	0
	osa-miR1880	2	0	5	3	4	5
	osa-miR439b	2	0	1	3	2	1
	osa-miR3982-5p	2	0	1	2	2	0
	osa-miR5515	2	0	0	8	0	0
	osa-miR396e-3p	2	0	0	2	0	0
	osa-miR1874-5p	2	0	0	1	2	1
	osa-miR1429-3p	2	0	0	1	0	0
	osa-miR169d	2	0	0	1	0	0
	osa-miR2096-3p	2	0	0	1	0	0
	osa-miR5537	2	0	0	1	0	0
	osa-miR7695-5p	2	0	0	1	0	0
	osa-miR827	2	0	0	1	0	0
	osa-miR395j	2	0	0	0	2	1
	osa-miR5809	2	0	0	0	2	0
	osa-miR169h	2	0	0	0	1	0
	osa-miR169i-5p.1	2	0	0	0	1	0
	osa-miR169j	2	0	0	0	1	0
	osa-miR169k	2	0	0	0	1	0
	osa-miR169l	2	0	0	0	1	0
	osa-miR169m	2	0	0	0	1	0
	osa-miR395d	2	0	0	0	1	0
	osa-miR395r	2	0	0	0	1	0
	osa-miR1863a	2	0	0	0	0	1
	osa-miR6256	2	0	0	0	0	1
	osa-miR395h	2	0	0	0	0	0
	osa-miR395k	2	0	0	0	0	0
	osa-miR160c-3p	1	6	3	7	14	6
	osa-miR1871	1	3	11	4	4	8
	osa-miR2118f	1	2	1	1	1	1
	osa-miR2118j	1	2	1	0	1	1
	osa-miR2118m	1	2	1	0	1	1
	osa-miR2097-5p	1	2	0	4	2	2
	osa-miR5811	1	2	0	1	2	1
	osa-miR2864.1	1	2	0	0	0	0
	osa-miR5493	1	1	2	1	3	1
	osa-miR395n	1	1	2	1	0	1
	osa-miR530-3p	1	1	1	1	0	3
	osa-miR812n-5p	1	1	1	1	0	2
	osa-miR5147	1	1	1	0	3	0
	osa-miR395b	1	1	0	1	0	1
	osa-miR2870	1	1	0	0	1	0
	osa-miR1883a	1	0	3	9	2	4
	osa-miR1883b	1	0	3	7	2	4
	osa-miR5510	1	0	3	1	2	3
	osa-miR5522	1	0	2	5	3	3
	osa-miR393b-5p	1	0	2	2	1	0
	osa-miR1876	1	0	2	0	0	2
	osa-miR5797	1	0	1	14	0	2
	osa-miR169n	1	0	1	3	0	0
	osa-miR169o	1	0	1	3	0	0
	osa-miR439i	1	0	1	1	0	0
	osa-miR393a	1	0	0	2	1	0
	osa-miR399d	1	0	0	2	1	0
	osa-miR398b	1	0	0	1	1	1
	osa-miR2867-5p	1	0	0	1	1	0
	osa-miR395c	1	0	0	1	0	1
	osa-miR5078	1	0	0	1	0	1
	osa-miR5534b	1	0	0	1	0	1
	osa-miR1846b-3p	1	0	0	1	0	0
	osa-miR1869	1	0	0	1	0	0
	osa-miR2275a	1	0	0	1	0	0
	osa-miR2275b	1	0	0	1	0	0
	osa-miR2878-3p	1	0	0	1	0	0
	osa-miR395y	1	0	0	1	0	0
	osa-miR395v	1	0	0	0	0	1
	osa-miR7693-5p	1	0	0	0	0	1
	osa-miR1320-5p	1	0	0	0	0	0
	osa-miR1426	1	0	0	0	0	0
	osa-miR1440a	1	0	0	0	0	0
	osa-miR1441	1	0	0	0	0	0
	osa-miR169f.1	1	0	0	0	0	0
	osa-miR169g	1	0	0	0	0	0
	osa-miR2118p	1	0	0	0	0	0
	osa-miR2275c	1	0	0	0	0	0
	osa-miR395e	1	0	0	0	0	0
	osa-miR395g	1	0	0	0	0	0
	osa-miR395i	1	0	0	0	0	0
	osa-miR395l	1	0	0	0	0	0
	osa-miR395m	1	0	0	0	0	0
	osa-miR395p	1	0	0	0	0	0
	osa-miR395q	1	0	0	0	0	0
	osa-miR395s	1	0	0	0	0	0
	osa-miR3979-3p	1	0	0	0	0	0
	osa-miR419	1	0	0	0	0	0
	osa-miR5072	1	0	0	0	0	0
	osa-miR5152-5p	1	0	0	0	0	0
	osa-miR5160	1	0	0	0	0	0
	osa-miR5337a	1	0	0	0	0	0
	osa-miR810a	1	0	0	0	0	0
	osa-miR812r	1	0	0	0	0	0
	osa-miR7694-3p	0	5	17	1	3	14
	osa-miR5143a	0	3	6	2	2	1
	osa-miR5143b	0	3	6	2	2	1
	osa-miR5523	0	3	0	4	2	1
	osa-miR1866-5p	0	2	1	3	0	0
	osa-miR2118e	0	2	0	0	0	0
	osa-miR2118r	0	2	0	0	0	0
	osa-miR530-5p	0	1	2	5	1	1
	osa-miR3981-3p	0	1	2	2	1	0
	osa-miR5805	0	1	2	1	1	1
	osa-miR5079a	0	1	0	5	2	2
	osa-miR5079b	0	1	0	5	2	2
	osa-miR5525	0	1	0	2	2	1
	osa-miR5073	0	1	0	1	1	1
	osa-miR6248	0	1	0	1	1	1
	osa-miR399a	0	1	0	1	0	0
	osa-miR399b	0	1	0	1	0	0
	osa-miR399c	0	1	0	1	0	0
	osa-miR1854-5p	0	1	0	0	1	1
	osa-miR169q	0	1	0	0	0	0
	osa-miR7694-5p	0	1	0	0	0	0
	osa-miR5485	0	0	24	0	3	4
	osa-miR5814	0	0	5	0	0	0
	osa-miR1870-3p	0	0	3	0	0	1
	osa-miR5158	0	0	2	0	0	0
	osa-miR5812	0	0	2	0	0	0
	osa-miR5488	0	0	1	19	1	0
	osa-miR5517	0	0	1	6	0	2
	osa-miR5810	0	0	1	1	2	2
	osa-miR1861e	0	0	1	1	2	1
	osa-miR1861k	0	0	1	1	2	1
	osa-miR1861m	0	0	1	1	2	1
	osa-miR6245	0	0	1	1	1	0
	osa-miR1853-3p	0	0	1	1	0	0
	osa-miR166c-5p	0	0	1	0	3	0
	osa-miR3981-5p	0	0	1	0	1	0
	osa-miR5337b	0	0	1	0	1	0
	osa-miR1878	0	0	1	0	0	1
	osa-miR1854-3p	0	0	1	0	0	0
	osa-miR1863b	0	0	1	0	0	0
	osa-miR2873c	0	0	1	0	0	0
	osa-miR5157a-3p	0	0	1	0	0	0
	osa-miR5157b-3p	0	0	1	0	0	0
	osa-miR5836	0	0	0	13	2	1
	osa-miR5796	0	0	0	5	1	0
	osa-miR437	0	0	0	3	3	0
	osa-miR5819	0	0	0	2	0	1
	osa-miR5511	0	0	0	2	0	0
	osa-miR6246	0	0	0	1	2	0
	osa-miR5524	0	0	0	1	1	1
	osa-miR159c	0	0	0	1	1	0
	osa-miR159d	0	0	0	1	1	0
	osa-miR159e	0	0	0	1	1	0
	osa-miR1428b	0	0	0	1	0	1
	osa-miR1428c	0	0	0	1	0	1
	osa-miR1428d	0	0	0	1	0	1
	osa-miR1861i	0	0	0	1	0	1
	osa-miR1861l	0	0	0	1	0	1
	osa-miR1859	0	0	0	1	0	0
	osa-miR1861b	0	0	0	1	0	0
	osa-miR1861f	0	0	0	1	0	0
	osa-miR2091-3p	0	0	0	1	0	0
	osa-miR2118d	0	0	0	1	0	0
	osa-miR2118g	0	0	0	1	0	0
	osa-miR2878-5p	0	0	0	1	0	0
	osa-miR418	0	0	0	1	0	0
	osa-miR5149	0	0	0	1	0	0
	osa-miR5535	0	0	0	1	0	0
	osa-miR5822	0	0	0	1	0	0
	osa-miR5832	0	0	0	1	0	0
	osa-miR7693-3p	0	0	0	1	0	0
	osa-miR818f	0	0	0	1	0	0
	osa-miR1437a	0	0	0	0	2	0
	osa-miR1855	0	0	0	0	2	0
	osa-miR528-3p	0	0	0	0	2	0
	osa-miR5823	0	0	0	0	1	1
	osa-miR1439	0	0	0	0	1	0
	osa-miR160f-5p	0	0	0	0	1	0
	osa-miR1861a	0	0	0	0	1	0
	osa-miR1861o	0	0	0	0	1	0
	osa-miR2863a	0	0	0	0	1	0
	osa-miR395u	0	0	0	0	1	0
	osa-miR817	0	0	0	0	1	0
	osa-miR1861d	0	0	0	0	0	1
	osa-miR1861g	0	0	0	0	0	1
	osa-miR1861h	0	0	0	0	0	1
	osa-miR1861j	0	0	0	0	0	1
	osa-miR1862f	0	0	0	0	0	1
	osa-miR1862g	0	0	0	0	0	1
	osa-miR2907a	0	0	0	0	0	1
	osa-miR6251	0	0	0	0	0	1
