# Supplementary material for: Genetic Subtraction Profiling Identifies Candidate miRNAs Involved in Rice Female Gametophyte Abortion
Source: G3 (Bethesda). 2017 May 19;7(7):2281–93. doi: 10.1534/g3.117.040808 (PMC5499135; doi:10.1534/g3.117.040808)
Supplement: Supplementary file 5 [file 2281TableS3.xlsx]

## Sheet: A1
	Table S3 All novel miRNAs predicted in six libraries.
	miRNA ID	Location	miRNA precursor	Structure	MFE	Id(5p)	Id(3p)	count	count(5p)	count(3p)	mature miRNA (5p)	mature miRNA (3p)
	novel_mir_1	Chr10:13988525:13988776:+	CAAATCTTTCAGAAGATGGAACAGATTGGCAAACATAAAAGCAAAGCAAAGTGGAACAAGTCAAAATTCATATCTCCAAATATTGTGAGGTGAAGACTGAATCTTGCGCATCAGATGTATCATTCAAGATTAGACACAGATATCTTCTGTCACATAGAGTGTCTAGGCATTAAAGCCACGGCAGTTGATAGCCCGTTAACGCCTTAGTTTTGTACTCCTTCAGTCCCAATCTTCTGTATTTCAGAGGAACTT	....(((((..(((((((((..(((((((...........(((((((............(((....(((((..((((((...))).)))))))))))(((((..(((((....).))))..)))))....(((((((........(((((...))))))))))))(((......)))..(((.((((((.....)))))))))...)))))))............)))))))))))).)))).)))))....	-51.5	A1-m0001-5p	-	32	31	-	AGAAGATGGAACAGATTGGCA	-
	novel_mir_2	Chr10:14220313:14220408:-	AGACATCTGGATATCACTTCTGATGTATTCCTTGGTGTAAGCTACTGAGATTTGGTATGGTAGTTTCTGTGGCACTTGCACAAGGACCAGTTTTAT	......((((((((((....))))))..((((((.((((((((((.((((((.........)))))).)))))..)))))))))))))))......	-28.1	-	A1-m0002-3p	261	-	261	-	TCTGTGGCACTTGCACAAGGA
	novel_mir_3	Chr11:4123111:4123226:+	ACGCGCTGCCGCCGCCGGCGTACCTGCTCCGGCACGGCGAGGCCGACGCCGCCGACCTGCACGCGGCGGCGGAGGAGAGGCGCGGGGAGTGGTAGTACGGCGACGGCGAGGCGCGC	.((((((..(((((.((.((((((((((((..(.((.(....((..((((((((.(......)))))))))..))...).)).).)))))))..))))).)).))))).)))))).	-70.4	-	A1-m0003-3p	39	-	39	-	GGGAGTGGTAGTACGGCGACGG
	novel_mir_4	Chr11:24795739:24795952:+	TTGGACCCCATATATATGAACATCCGAGCTAGGCACATCGACGTTACTATGGTGGCAAGCATCGTGCGAATCAGTCTCTCGCACACCAACTAGCACATCATCAGTAATATGCATGCTGTAGTGCTGTACGCACTCACATATATGTACTCTTAGGAGTGGAAAGCGTCAGGACAGCGTATTGGGCGTCTTCTTGGATATTCGTCGTAGCGTCCAC	.(((((....(((..(((((.(((((((..((((.(.((((.((((((((((((((.((....((((((.........)))))).....)).)).)))))).))))))....(((((...((.(((.((((..((.........(((((....)))))))..))))))).))))))).))))).)))).))))))).))))).)))..))))).	-61.1	-	A1-m0004-3p	9	-	9	-	CGTCTTCTTGGATATTCGTCG
	novel_mir_5	Chr11:25133059:25133385:+	CCCACAACAATCCCTGAAGACTAGAGTACATTTGTGGCCTGGCAAGATTTGGATGTATTTCTTTACTAAACATTTACTAATTTGCAATCTATTTGAGTTTCTGACATTCAAACATAGAAGTCTGTCTGTCTGTCCCTTTATCGATCATCACATGTAACAATTTAAGTCAATAACATTTTTTTACCCCTCAGCTAAGGCTGGCATGAGTTGTGTACACATTACAGCGTCGATCCTCATATGTGAGTTGTGTATTCTTTCATCTACAAGGTTCCTCTAAATTAATACCTAGTGCCATCTTCGTAGTTTAGTTCATGGGAGGCAACACGA	..........(((((((..((((((.(((....(((((((((...((((((((.(.((((..............((((((((((((.......((((.....((((..((.(((........))).))..)))).....((((((.......((((((((((((.((((................(((......))).)))).)))))))).)))).........)))))).))))..))))))))).)))..............)))).).)))))))).....)))).)))))....))).))))))))).))))..........	-60.3	A1-m0005-5p	-	6	5	-	TCCCTGAAGACTAGAGTACAT	-
	novel_mir_6	Chr11:26390432:26390548:+	AGGATCTTTTTGATGCTGTCTAACTAACTCGTTTCATGTTTCATGTTTTATCTTAATTGTAGCTGACATAAGAGCTCAATGTTGTGCAACTTGGTTTCGTAGCGTCAAAGATACACA	......((((((((((((...((((((...(((.((((.................((((.((((........))))))))..)))).)))))))))...))))))))))))......	-23.5	-	A1-m0006-3p	27	-	27	-	CAACTTGGTTTCGTAGCGTCA
	novel_mir_7	Chr11:8933462:8933545:-	GAAACAGTTCACCAAATAATTCTTTTGCATGTTTGATGGATTAATTATGTGGTCGATATGCGAGAGGACTTGGCTGCTAGTTAT	..((((((...((((....((((((((((((((.(((.(..........).))))))))))))))))).))))..))).)))..	-20.1	-	A1-m0007-3p	6	-	6	-	CGATATGCGAGAGGACTTGGC
	novel_mir_8	Chr11:10007473:10007796:-	AAATCAGAAGTACCCACGTTAGCATTCATCAGGGATCACACAAAAACTTCCAAGTATTAACTGCACATTAACTTGGGACTTGGGAGCAGTACATTACATATACCAAACCATCCGTCCATCGGAATAGCACTGTGATGACCTAAAAATTAGAACATGGACCACATAGGAGTAGCTTATACAAGGCAAAACAGTAACGCAAAATGCTAGCATCTTCAGTAATTCAAGCATGCACGCATGCATGAGGAATCAGTAACATTTCTGATTGGTGTCGGCATTCTAATAGGGTTTAGGAGACATGGGGAATTTAGCGTGCACTTGTGGTAG	..((((.((((...((((((((.((((.(((.(..((.........(((((((((.((((.(........).)))).)))))))))........................((((.....))))...(((((((..((.(((.................((.....)).(((.....))).)))))..)))))...))..((((((.(((((........((((.(((((....))))).)))).((((((........))))))))))).))))))((((......))))))..).))).)))))))))))).)))).))))..	-74.1	-	A1-m0008-3p	10	-	10	-	ACATGGGGAATTTAGCGTGCA
	novel_mir_9	Chr11:12147701:12147994:-	GTTGGTCCAATTAATCGTCGATCAGGCACAATTAATTGTCCGATCAGAGCACCTATCGATCACCTTTTGAACAATTCTTAGGGTTTAGCACATGTGAATATGTGCTACTACTGCTGGTTGCTTTATACTAGGGCAAGTGACCATCTTGCCATCAATTATTAGTGCTGTGATTGCTTTATACTATGCACTATATAGAATATAGGTTCTAGTATTCATAGTACTGATCAGGTCGACTAATCGAGGCTGATCGACGATTAATTTTCCTGGTCGGTCCCTTGGTGATCAGGATCAATC	........(((((((((((((((((.(.(.((((.(((.((((((.((.......))))))(((((..(((...)))..))))).(((((((((....)))))))))......(((((........)))))((((((.......)))))).......(((((((((((((.((((..(..(((((..((....))..)))))..)..)))).)))))))))))))..)).))).)))).).).))))))))))))))))).(((((((((.(.....).)))))))))......	-102.6	A1-m0009-5p	-	66	66	-	TTAATCGTCGATCAGGCACAA	-
	novel_mir_10	Chr11:16493226:16493515:-	ACCGGCACCGATTTGTGTGTCTGTAGCGGTGTGTGACAATTACATCATGGATGAGCTCGCTTGTTCCCGTGAAATCGTCACCGAGTTCGCGCAGCATGTACGCGGACTCTGCCCAGAAATCTACTACCAACGAGAACTCGTTGCAAGTTCGTTTTCTGCGCACGCAAGTCATTTACTAATTGTTATATTTTGGGACGAAAGGTATTTTGGGACGGAGGGAGTAGTAGATATACGATTTTTATTAAAACTGTGTTCAGTACAGACTGACAGGTACACACATTCACTAATTA	.........(((.(((((((((((..((((.((((.........((((((..((((......))))))))))..(((((.(((((((((((.........)))))))))(((.((((((...(((..((((((....))))))..)))....)))))).))).((((............))))........)))))))...........(((((.((....(((((((.........)))))))...)).)))))..)))).))))))))))))))).))).........	-79.7	-	A1-m0010-3p	33	-	33	-	CAGACTGACAGGTACACACAT
	novel_mir_11	Chr11:16808168:16808448:-	GTCTGGTCACCATTGCGGGTCTCGCCGCGCTGAGGGGGAATCGGGTTGAGGACGACGCCGTATCGCAAGCGCCGCTCGCCCACTTGCTGAGCACGGTTCTTGAGCTCGGCGAGCTTGGCGGCGATGTCACAGCGAGGCCTGCAGGTGTAGATCTCGTACAGCGCCCTGTACACCTCGACGAGGCATCCGTCCCCGCGGGGATCGTGACGGAGACGGTGGGCGAAGTCGTCGACGCAGTCCTCCATGTCGTAGGCGATGTCGCGGACCTGCTTCATCCAGTC	..((((.((((..((((((((((((.(((((..(.((....(((((((....)))).)))..)).).)))))(((.((((..((((((((((.((.....)).))))))))))...)))))))........))))))))))))))))........((((((....)))))).((((...))))..((((((((....)))).)).)).((((..(((..((((.((((((.(((((........)).))).)))))).))))..)))..))))..))))..	-123	-	A1-m0011-3p	6	-	6	-	TAGGCGATGTCGCGGACCTGCT
	novel_mir_12	Chr11:24920007:24920082:-	AAGCATGATCAATGGGATTGAGGGGTACCAGGAAAGAACACCTTCCTAGATTTCTCAGAACGGTTGTTGTTCTGCT	.((((.(((((((.(..(((((((((.(.(((((........))))).))))))))))..).))))..))).))))	-22.2	-	A1-m0012-3p	93	-	92	-	CTAGATTTCTCAGAACGGTTG
	novel_mir_13	Chr12:2441355:2441614:+	GCCCGCGGCGGTGGGGCGGCGGTGGTGGCGGCGAAGGTGATGGACAGGAAGGAGCTGGCCGGGAGGAACAAGGAAGGGCGGGCGAGAACCGAGAGGGAGATCCTCGAGGCCGTCGACCACCCCTTCCTCCCGCGCCTCTACGGCGTGGCCGAGGGGGATCGCTGGTCCTGCCTCCTCACCGAGTTCTGCCCCGGCGGCGACCTCCACGTCCTCCGCCAGCGGCAGCCGCACCGCCGCTTCACCGAGTCCGCCGTCAGGTA	(((.((((((((((((((((((((.(((((.((..((((..((((.(((.(..((((.(((((.(((((.((((((((..(((((...((..((((.....))))..))...))).))..)))))))).(((((((.....)))))))..((((((((((...)))))).))))........)))))..)))))))))..).)))..))))..))))..)).).)))))))))))))))))))......)))))..))).	-149.5	A1-m0013-5p	-	11	11	-	GTGGGGCGGCGGTGGTGGCGG	-
	novel_mir_14	Chr12:14576174:14576431:+	CAGGACTAAAGATGATCTATTAAAAATCATGTAGTCTCGTTCTGCTTATAAACCGGGACTAAAAACCATCTTTAGTCCCGATTTTTATTGCAACCGGGACTATTATGGTTTTGGTCGACCGGGCAAAGATAATTTCTCCACTAGTGTAAGTAGCAATGGTACTTGAAGCATATAGCTAACAATCTCTTGCTGCATCCATTCTCATCTGACGAAGGACGATGAAAATGCTGAGCACGGACGAGCTAGGAGATTGTCCTA	.(((((..................((((.(.(((.(((((((((((((....((((((((((((.((((...((((((((..............))))))))..))))))))))))..))))....(((.....)))............(((((((.((...(((.(((.....)))..))).)).)))))))...((((.(((((...........))))).)))).)))))).)))))))))).).))))))))).	-75.9	-	A1-m0014-3p	9	-	9	-	CTGAGCACGGACGAGCTAGGA
	novel_mir_15	Chr12:15176235:15176307:+	TGCCATGGAACCTGCCTGATTCCTGTGCTGTATTGAATAAAAAGTTAGTAGAGGCTTGCAGGTGGAAATGGCG	.(((((...((((((..(...(((.(((((.(((........)))))))).))))..))))))....))))).	-26.5	-	A1-m0015-3p	13	-	13	-	AGTTAGTAGAGGCTTGCAGGT
	novel_mir_16	Chr12:15283679:15283799:+	AGCGTACAGTAGATGTGACTGTGTATTGCATGGTGGTTGGATTGGGAAGCATCAGGAGCTCTTATGGATGTCACCTTCCCTCCAAACCAATCCAGAGATCGCGGACAGGTTGCCATGTTGC	.(((.(((...(((.((.(((((.(((...(((((((((((..(((((((((((((....)))...))))....))))))))).)))))..)))..)))))))).)).)))....))))))	-36.5	-	A1-m0016-3p	93	-	92	-	TCCAGAGATCGCGGACAGGTT
	novel_mir_17	Chr12:16288620:16288934:+	CCAGTTTAGAGGCATCTGCTCGGTTTAGGGCAGAACTGTAATCTACCGTCTATCATGTTTATCTATAGAAGGCATATACCATCACCAGAAAAAGCTCTCTCTGGTATTTATTCGTTACGCCGATCCTACACCAGGCCATCTTGTTACAACTGCTGGGCTTTGTTTCAACAGTGTGTAACGACCAGTAATCCTGCACGAGCTAGCACAGTTTCCATCAAGACATTAGACATACTTTCTCTTCCAAGGCGCTGTAGGCTTGGGAGGAATCATGAACGATCGCTGGACATGCTCAACCGAAGGTGCTACAGAGACATC	...((((...(((((((..((((((..(((((.........((((.((((..(((((..........((.((......)).))((((((..........))))))......((((((((((......(((..(((((.....((....)).....)))))))).......).))))))))).......((((.(.((((((...(((((..((...((((....((.....))...))))....)).))))).))))))).))))..)))))..)).)).))))..))))))))))))))))))....))))...	-77.7	-	A1-m0017-3p	10	-	9	-	CATGCTCAACCGAAGGTGCTA
	novel_mir_18	Chr12:17949899:17949979:+	GTCGTCGTCGAACCATCGCGTCGCGTCCCCGTGTCTGTCGAGCGAGATGGATGGATGGATGGATGGATGGGACCGGACGAG	.(((((......(((((.((((.(((((...((((((((......))))))))...)))))))))))))).....))))).	-34.8	-	A1-m0018-3p	12	-	12	-	ATGGATGGATGGATGGATGGG
	novel_mir_19	Chr12:18041571:18041660:+	CTAGATTGTAGATGAACTTCTGAAGGGCGGAACTAGAAATTGGCCAAGGCCTTAGCCCCGTCCATGGAAGTTTGGGTCCTACACAATAGA	(((...((((((((((((((((..((((((..((((.....(((....)))))))..)))))).)))))))))..)).)))))...))).	-30.2	A1-m0019-5p	-	14	13	-	GATGAACTTCTGAAGGGCGGA	-
	novel_mir_20	Chr12:18190759:18190899:+	TACATGTGTAGATCTAATGATGCGTTCATGCTAGTTTTCATCTGTAATGTCATGATTTATTTATGGAATAGATTAAATCATTATATGTCTATAATCTCAACACTTTGTTCCAGCTAGCAGAACTATCGCGTTCCACATGAA	..((((((..((.(...(((((.((((.((((((((......(((((((...((((((((((...))))))))))...))))))).............((((...))))..))))))))))))))))).).))))))))..	-31.8	-	A1-m0020-3p	76	-	76	-	CAGCTAGCAGAACTATCGCGT
	novel_mir_21	Chr12:18292723:18292803:+	TGATCTGGCACAAGGCAACCTGTGGAGGGCACAATATGTATTTCCAAAACATGTATTCTAGAGTTTGTCATGGCCAGCAAC	....(((((.((.(((((.((.(((((.(((.....((......)).....))).))))).)).))))).)))))))....	-23.9	A1-m0021-5p	-	185	185	-	CAAGGCAACCTGTGGAGGGCA	-
	novel_mir_22	Chr12:18850025:18850182:+	AGAAGCTACTCGAGAAGTTGGACATTGGCACTCTGGGTCAAGTTGTGTGTACTCTATTTCACTATTAATTTGTTTTTTCTACTTTTTCTTTCATCCTTATGTGTGTACTGGATCTTTTGATTGATGCCATGACTTGCTTTTCCAAGATAATGGTTAAA	...(((((.(((((((((.((.(((.((((...(.(((((((......((((.(................................................).)))).......))))))).)))))))).)).)))))))...))...)))))...	-22.7	A1-m0022-5p	-	6	6	-	CGAGAAGTTGGACATTGGCAC	-
	novel_mir_23	Chr12:21175348:21175422:+	ATGCATGGCTGTTGGTTTAGGAGGCATCAGGAGTTCTCATTTGACTTGATCGTTCTGACCCTCACCAAAAGTGCA	.(((((((.((..((((.((((.(.((((((...((......))))))))).))))))))..)))))....))))	-21.1	-	A1-m0023-3p	6	-	6	-	CTTGATCGTTCTGACCCTCAC
	novel_mir_24	Chr12:21724366:21724570:+	GAAACACTTGTACAGTATAAAGATGGTGCATCCTCATGTTTCTGTCAAACACAACACTACTGATATTCTCAAATTCATCACCATAGACGATGCATGTTGTAGGCTTGGTAGGCAGCAGGAATACCAAATCCTGCTCCATCTACTCTCTCAGTGTGCCTTTATTTACATAGGAATATTAGGAGTGTGCCATATCATACGGTTGTTT	.(((((.....((.((((....((((((((((((.((((((((((.........(((.(((((...((((((..(((((.........)))).)..))).)))...((((((.(((((((........)))))))...))))))...))))))))...........)))))))))).)))).))))))))...)))).)))))))	-51.1	-	A1-m0024-3p	8	-	8	-	ATTAGGAGTGTGCCATATCAT
	novel_mir_25	Chr12:21902236:21902550:+	CTCCCATCCAAGCCCTACTCTTTTTCTTGGTAGCTAATCTCGCTAAACCATTATTGTGCTCCTCGTTTAGGAATTAATTACCAACTACTACAAAACATGGTACTTTGTTTCTACACTGCGGAAACACGTGATCTAGCTCATTGTGTGACAAGGCATAGAAGATTGAAATGAAACAAGTGAAATAATAATAAAAGAAGTCATGCATGCATAATTCGCTGGAATTTTCAAAAGCAAAGGAAGTCGAAATTAAACGATGTATTTTTTTATCAAGTGAACAGAGCAGTTGAAAACAGGGTAGTGAGTCTTGGCAATTGC	.......((((((((((((((((((((((((((.((((.((.(((((((((....)))......)))))))))))).)))))))........(((((........)))))....(((((.....(((.(((((((((..(((((((......((((....((((...............................))))))))..)))))))..))))))............((((...((((........))))...))))....))).)))......))))).))))).))))))).).).))))).......	-58.47	-	A1-m0025-3p	7	-	6	-	TGAAAACAGGGTAGTGAGTCT
	novel_mir_26	Chr12:24317796:24317931:+	TTGCAGTTCTTCGCCGGGAATTTCACAAGTATTCTACATGACATATCGTCTTCAAGATTTTGAAAGTGGCGTTTGGCCTAGGAGGCATCAGGACTTCTCATGTCAGAGGATGTAGTCGTGTAGGTGCTGACTGCCA	..((((((.(((.....))).......(((((.((((((((((((((.(((((((....)))))...(((.....))).....(((((.((.....)).))))).)).))))).))))))))))))))))))))..	-39.5	-	A1-m0026-3p	13	-	13	-	GAGGATGTAGTCGTGTAGGTG
	novel_mir_27	Chr12:24867698:24867939:+	CAATTCTCTGATTGCATCTGAATACTACTACATTTTGAATTCAGAGAAGAGGGATGATAACATCCTGGTGCCTCCTAAGCCTACCATAGCAACCCACTGGCTTGGTCCTCGTAGCCTTTTGTTTCTCTCCACCATTTTGTAGCGCTTGGGCTCACTCATCTCATCTTTTATGGAGCGAAAACCGCAGCATGTACAATACCATATATGAATGCATAGTATAATTCAATGCAGTATATGAATGC	..((((....(((((((.(((((..(((((..(((((..((((.(((((((((((((..........(((...(((((((((((...(((((......((((..(....)..))))..)))))...............)))).)))))))..)))))))))).)))))).)))).)))))...(((.((((((........))))))..))).)))))..))))))))))))....))))..	-58.1	A1-m0027-5p	-	11	10	-	ATTGCATCTGAATACTACTAC	-
	novel_mir_28	Chr12:8088493:8088581:-	ACCAGGGTTCTTCCTGTATAGGGGTCAATGTTTTATAGTTCTAGCTTCAATGGGCAATAGAACACTCTCTGAATAGGTAGAATGCAGTT	....(.(((((.(((((.((((((....((((((((.((((..........)))).)))))))).)))))).))))).))))).)....	-25.4	-	A1-m0028-3p	15	-	14	-	AGAACACTCTCTGAATAGGTA
	novel_mir_29	Chr12:8154206:8154517:-	AGTAGTTTCCGAAAGCCTCTTGAATAACTTTTTTTACCATCTGTCAAATTCAGTGGCGAAGATTCATTCACTATCTTTTATCTTTTTAAAATCTGTAGTTTGTGATAAATTTGATATTAAATTTATAATACTGTGATGCATCATCTTAAATCTATATTTTTGTGATAATTTGATTAATATACCTATAGTTTTATGAAATTTACTTAAAACAAAGAAACAACCATCAGTGTCTGCTTGGAAGGCCTGTTTTGGACCTAAAATCAACGTACATGACAGCCCCAGAAATTGTTCAAGTTGGGCTGAAGAACGTTG	....((((.....((((((((((((((.(((((...(((.(((.......))))))((((...((((..(((((.(((((......)))))...)))))..))))....))))........(((((((.((((((..........((((((.((((....))))...))))))..........)))))).))))))).....(((......)))......(((.(((...)))..)))..(((.((((.((.((...........)).)).)))))))..))))))))))))))..)))))...))))....	-53.3	-	A1-m0029-3p	13	-	13	-	GAAATTGTTCAAGTTGGGCTG
	novel_mir_30	Chr12:15141388:15141495:-	CCTATGTAAGTATTCATTATCTGCAGTATGATCTAGCTTTATTTTTGCGAACTTGAGGAGTCCCCTAAAATAGCAATACATCTGCAGTATGAGGGGTAATTGCATAAG	..(((((((.(((((.((((((((((.(((.....(((..(((((.(.(.((((...)))).).).))))))))....))))))))).)))).))))).)))))))..	-25.6	-	A1-m0030-3p	8	-	8	-	ACATCTGCAGTATGAGGGGTA
	novel_mir_31	Chr12:18102039:18102221:-	CAGCCTTGTGCCTAGGCTTCCATGTGGTTAGGGGTCGATAGTAGAGCTTCTGCTCACCATCCATGCCTGAAGAAGGGAACAGTGGACCTAGTCCAACAACCAATGTGGTTAATTTCCCCCACAAAATCTGTAAAAAGTGAAACTTTGTTGCAACTTTCATGGAAGATAGGCTCTCTTTGGCTT	.((((..(.(((((..((((((((.(((((((.((.(((.((.((((....)))))).))).)).)))))....(((((...(((((...)))))..(((((...)))))...)))))..........((((((((((...))))).))))).))..)))))))).))))).).....)))).	-58.2	-	A1-m0031-3p	128	-	127	-	ACTTTCATGGAAGATAGGCTC
	novel_mir_32	Chr12:22077493:22077682:-	CACAAGCTATTGGCAGAGGTAGTTGTGTTACAGCTAAACAAGAGCATCAAAACTTGGATAAGAACTATTGGATAGTTGGCTAACTGCTAATGCACTCGTTTGATTCCCGATGCATCCTAGTTCTACGTTTGTAACGTAACTGCATTGTAAGCATGTGAAGCACTGGTCTTTGCCGAGATGCTAGCTGTGA	((((.(((((((((((((.((((.((.((((((((..((((..(((((((...))))....((((((..((((.((((((.....))))))(((.(((.........))))))))))))))))((((((...))))))..))).)))).))).))))).))))))..))))))))).....)))))))).	-54.4	A1-m0032-5p	-	13	12	-	TGGCAGAGGTAGTTGTGTTAC	-
	novel_mir_33	Chr12:24357224:24357383:-	AAGGGGATGATCTCTGTGATTTTGGTGGCTCCTGTCTTGATCCACGTCTGTGCTTTTTCCTTAATCTTAGTGACGACCATGGTTGTTGTGGTAGCTATGTGCCAGAAGATATTGGCATTGCGCTCGCACTAGAGCCCCCAAGCCGCAAGGTTTTCCTCGG	..(((((.(((((.((((..(((((.(((((...........(((....)))...................((((((....))))))(((..(((...((((((........))))))...)))..)))..))))).))))).))))))))).)))))..	-49.4	A1-m0033-5p	-	5	5	-	TCTCTGTGATTTTGGTGGCTC	-
	novel_mir_34	Chr12:25664707:25664817:-	TTCAGCTTTTGCTGCCCTTGTTTTGCATTGTATAGGTATAGCAATATGCCATTCTGTAGTGGCATACCTCTACAGTGCAAAACAAGGACAACAAGAGGTGGCAAAGCTCTA	.(((.((((((.((.(((((((((((((((((.(((((........(((((((....)))))))))))).))))))))))))))))).)).)))))).)))..........	-49.6	-	A1-m0034-3p	14	-	14	-	AAACAAGGACAACAAGAGGTGG
	novel_mir_35	Chr1:6371499:6371570:+	CGGCACAGCTCGGCTATTGGGCCGTGCCTGGGCCTATGCCTCGGCACGGTGGGCTAGCCCGGTAGAGCACGA	((((...(((.(((((....((((((((.((((....)))).))))))))....))))).)))...)).)).	-36.6	A1-m0035-5p	-	6	6	-	CGGCTATTGGGCCGTGCCTGGGC	-
	novel_mir_36	Chr1:34261987:34262054:+	CTTTTACGCTCCAATTGGGTTCGATCGTGTGAGTGTACCCGCGAATCAAGCGGATAGGAGTAAAAAGA	(((((..(((((.(((.(.((.(((((((.(......).)))).))))).).))).))))).))))).	-19.8	A1-m0036-5p	-	33	33	-	CCAATTGGGTTCGATCGTGTG	-
	novel_mir_37	Chr1:1178978:1179253:-	ACCGCGCACGTCTCCGGCGATCTACAGGTATCGTCGCCACCTCCTAGCCCCCGGTCTCTCATCATACGGTGGCTTCCCCCCGTGGTGGATTCCTCGGTCGGTTCCGATCTGTTCGGGAGGTGGGGGTGGGGGGTCGTTGTTCTGTAGGTTATGGAGCGTTGGTGGTGTTGTTTTTTGTGGGTGGTTCGAGGTGAATCGGTGGGTTGATTCCTGATTTTGCTGTTTGTTTTGGCTGTGATGAAGGTGTAGATCGCTTCCGGAGACATCCAACCGCGG	.(((((...(((((((((((((((((....(((((((((((((..((((((((......((((((((((.((.....)))))))...(((((((((.((..((((((.....)))))).....)).)))))))))..(((((((((...)))))))))....)))))..........)))).)))).))))))((((((.((......))))))))..((((.......)))).)))))))...))))))))))...))))))).......)))))	-102.4	-	A1-m0037-3p	11	-	11	-	TGTAGATCGCTTCCGGAGACAT
	novel_mir_38	Chr1:3147765:3147838:-	GGTGCAGAATAAAGACAACAAGATTAGGGGGTGATTGTTAGACTTAATCTTGTCGTTTGTGTTTTTTTTCATCC	((((.((((.(((.((((((((((((((..............)))))))))))....))).))).)))))))).	-18.8	A1-m0038-5p	-	5	5	-	AAAGACAACAAGATTAGGGGG	-
	novel_mir_39	Chr1:23534792:23534880:-	GCCGGCGGCCAGTGAGAGAAGAGTCGAGCGATGTGCGGCGGCGGTGTCAAGCGGGCCCTTGAGCATGCGGTCGTCGTCCTCGCGCACGG	.((((((.................((((.((((.(((((.(((...(((((......)))))...))).)))))))))))))))).)))	-31.3	-	A1-m0039-3p	11	-	10	-	TTGAGCATGCGGTCGTCGTCC
	novel_mir_40	Chr1:23691498:23691703:-	CCTATATTGTAGGGTGGATCTCGAAAGATAGGAAAGATCTCCCACCAAGATGTCGATATGACTTTTATCGAATACGACTTTACATAGTATTCTATAGGGATCTATGAGACCGAGTGTGGAAATCAGTTTACTCACTTAAAATTTATTAGTATCCGCCTCCCTCCTTTTCCTGTATTTTCCATATTCATACCATCAAGTTCTTAGGT	((((..(((..((((((((...((((((((((((((((((.......)))).((((((.......))))))...........(((((.(((((...)))))))))).((..(((.((((((((.(((((.........))))).)))....))))))))..)).))))))))).)))))...)))))).))..))).....)))).	-42.9	A1-m0040-5p	-	6	5	-	AGGGTGGATCTCGAAAGATAGGA	-
	novel_mir_41	Chr1:34287374:34287536:-	ACACTTGCTCTAAGCGTGCTCAGCTCGTAGGTAGGGTGCGCTCTACGTCGTGGGTGTTGACAACCGCCGTGTCTGGCACAAAATTAGTACCCATGCTTGCCGCCATGTAGCAGTGGAGCCCGTGGAATGAGATGCTTGGGAATGAGACCGCAGAGACGACATG	....(((((((..(((..((((..((.((((((((((.((((((((((((((((((((((.....(((......)))......)))))))))))).........)))))).))))..))))...........)))))).)).))))..))))))).)))....	-50.6	-	A1-m0041-3p	5	-	5	-	TGCTTGGGAATGAGACCGCAG
	novel_mir_42	Chr2:5209900:5210119:+	CATCAAATGGGTTCAGGAGTCGTTTCCGACAGGCGGGGATTGCTCCGGGTTGGTGGTGATCTACGAGCAGTGCGTGCGTGCCTTCTGGCACGACGACCGCTACAAGAACGATCTCCGCTACCTCAAAGTGTGGCTGGAATATGTGAGTTTCATGAATTCAGGATTGGTTCTGAGGTGGATTGGTTGGATTGGATTGGATTGGTTTGGTTTCCTTTTGACA	.(((((((.((((((...(((...((((((...(((((....))))).(((.((((....)))).)))....(((.((((((....))))))))).(((((...(((((((((((((((((((...)).))))).))).....(((((((...))))))).)))).)))))..)))))....))))))...))))))))).)))))))............	-75.5	-	A1-m0042-3p	8	-	8	-	TGGATTGGATTGGTTTGGTTT
	novel_mir_43	Chr2:10612135:10612407:+	CACAGTCGTGCAATGCCAATCGTCTGGACACATTTACGGAAGGGATCTTGTGCAAGCACAAGTTTATAAGTGGCATTTTGTCTTCCTGGTACCTACCATTCCCTTACCATGTTTTCTCTGTACTCCTCTCACACATAATCTAAGCTAAGCTGTTGATTTGCAAAGGAGATTTCCAGAATCAGTCAAGCTAGCAATACAAGTCCGTACCGTACCCATATATATATGTGCAACCGCTCTTCTCTGTCAGACATGTTGGCGTGTGATATATCTTGG	((.((..(((((((((((((.(((((.(((....(((((.(.((((((((((....))))))..((((((.(((((..........((((....))))..........)))))..)).)))).....................((((.(((((((((((.....(((....))).))))))).).))))))).......)))).).)))))..(((((....)))))..............))))))))..)))))))).)).)))..)))).	-54.4	A1-m0043-5p	-	15	14	-	CAATGCCAATCGTCTGGACAC	-
	novel_mir_44	Chr2:13849040:13849383:+	GCCGCCTCTCCCGCCACCGGCGCCGCTTCCCTTCCCATCTCCCTCCCTTCTCGCCGGCTCGGCGCGGCAACGGCGGGGTTCGGCGGAGACGGCGCCGTCCCAACGGCGGCGACGACGGCGTTCGCGGTGGCCGCGCTCCCTCTTCCCCTCTCCTACCCGTCTCGCCGGCTTGGCGCAGCGACGGCGGGGTGCGGCGGAGACGGCGGTGACGGCCGTCCCTCCCCCTCTCTCTCTCCCCGTCGGCCTCGACGGCGACAGCGCCCTCCCAACGGCTGTGATGGCGTCGGCTTCATCCATGGGCGGATCCGGCGGCGGCGGCGGCGGTGGTGGTGGTGTCGGTGGCC	((((((....(((((((((.(((((((.((((.((.(((((((.....((((((((((((.((.((....)))).))).))))).))))((((((((((((((.(.((((((.(((((.((.(((((...)))))...................))))))))))))).))))).(((((...((.(((((((((.((.((((((.......)))))))).))...........((.((((((....)))))).))..))))))).))....)))))))))))))))...........))).))))..)).)).)).))))))).)))))))))....)))))).	-175.4	A1-m0044-5p	-	66	65	-	CCGCCACCGGCGCCGCTTCCC	-
	novel_mir_45	Chr2:18396191:18396261:+	CTCGTGCATGCCTCTTTTAGCCATCTACTGTTACGCCAAAGGTTGGCTTAGAGCAGGTATAATAGCAGTCT	....(((((((((((((.(((((.((..((......))..)).))))).)))).))))))....)))....	-20.6	-	A1-m0045-3p	8	-	8	-	AAGGTTGGCTTAGAGCAGGTATA
	novel_mir_46	Chr2:27148134:27148282:+	GGGCTTATCAAAGGGGCGCTTACTGAGAGTTCTTTGGCATTCTGTCCACCTCCTTGTCGAATCCTCAGAGACAGAAATCTCATATCTGTTGATCTTGGAGGTGGGCATACTGCCAATGGAGCTGTGTAGGCCTCCCTTTGTAAAACCCA	(((.....((((((((.((((((....((((((((((((...(((((((((((..(((((.......((((......)))).......)))).)..)))))))))))...)))))).))))))..)))))).)))))))).....))).	-68.4	A1-m0046-5p	A1-m0046-3p	21	20	1	AAGGGGCGCTTACTGAGAGTTCT	AGCTGTGTAGGCCTCCCTTTG
	novel_mir_47	Chr2:20249942:20250211:-	GACCGCAACTGTAAGGATGACAGAGAAGCATCGATGTTGTCCACCTCTGCGTTTCAACTAGGTACATCTCTTGGGGCCGTACCTATGATTTGTGGATTGCTCAGTATTCATGGTAGCACACATGCCCACTGCACACGCTGCAAAATGAAGATGAACACGCTTTAGGCTTTCGCGTAAGACAACAGGATTCTTAGTGCCGCCCATTTCTATAGTTAAATTGGACATAAAACGCGTATGAGCATGTTGGTTAGTCCCTTGTCAGTTGTCACC	....((((((((((((.((((.((.(.((.(((((((((((((..((((((..(((..(((((((..(((...)))..))))))))))..)))))).((.(((...(((((.(((((.....(((.....)))...)))))...)))))..))).)).......(((...(((.(((((.........))))))))..))).................))))))......)))).))))).).)).))))...))))).)))))))....	-65.4	A1-m0047-5p	-	32	31	-	GTAAGGATGACAGAGAAGCAT	-
	novel_mir_48	Chr2:20404010:20404112:-	AAAGCTGCGGATTTGCCTCCGGTCAGGTACGGAACAAATATAATGCGTGCAGACGGCGATGAGATGCGTGCCATACTTGATCGCGGCAAGGATACGCCTTACA	......(((..((((((..((((((((((.((.((..((...((.(((.......)))))...))..)).)).)))))))))).))))))....)))......	-30.3	-	A1-m0048-3p	31	-	30	-	ATACTTGATCGCGGCAAGGAT
	novel_mir_49	Chr3:30263650:30263716:+	TACCTCCATCCTTTAATATATGACGTTGGTTTGTTCACCAACGTCCTACATTAAAAGAACAGAGGGA	..((((..((.((((((.((.(((((((((......))))))))).)).)))))).))...))))..	-22.8	A1-m0049-5p	-	8	8	-	CTTTAATATATGACGTTGGTT	-
	novel_mir_50	Chr3:32511910:32512120:+	ACCACATGCAAGTGCTATCATTTCACCTACATCGTTTATTAGCTACCAAAATAATTTTTTGAAAGAACTTTTATATATGTGTTCATAGCAATTTAAAAGCTAATGATGAAAAATAAATTACAGCAAAAAAATCAAAATTAACTCTTTAAGAAATATCGGAGCTGGTGAGAAGCAAAGAAAACAAATGTAGAGAGAATGGTCGTGCGATGGA	.(((..((((.(.(((((..((((..((((((..((((((((((.((...(((.(((((((((.((((............)))).((((.........)))).((((.......................))))..........)))))))))))).))))))))))))...............)))))).)))))))))).)))).))).	-32.5	-	A1-m0050-3p	86	-	86	-	ACAAATGTAGAGAGAATGGTC
	novel_mir_18	Chr3:36271499:36271667:+	AGGAGAGGTTATGGATGGATGGATGGATGGGATTGGATTCCCCTTCCCCCGCCCCCAACTAAACAAACAACTAGTATATGCTAAGGGCGGCGCAACGCTAATACTCCTCCCTAGTCCTCCTAGGCTACTCCTCTCCTCCCTTCCATCCATTCACCCTTCGCTTCATCCG	.((((((((...((.((((((((((((.((((..(((.......))).((((((.................((((....)))).))))))...................(((((.....)))))............)))).)))))))))))).))...))))).))).	-55.8	A1-m0051-5p	-	11	11	-	ATGGATGGATGGATGGATGGG	-
	novel_mir_51	Chr3:1205062:1205245:-	AGTGAAGAGAAAGAGTAGCGTTGATACACCGTCGAATCGAATCGAATCGTGCCGGACCCCCACCATCGCCTCCCCTCTCCCCATATCGGAATCGGAATGGGGAGCATCGCATCCCTTCCCTTTCCTTTCCCTCTTGCGTTTGCGTGATTCGTACGGTTTATCACCGCCTCTTTCTCTTCCACTC	(((((((((((((((..(((.(((((.((((((((((((...((((.((((..((....))..)).))........((((((((.(((....))).))))))))...((((.......................))))))))..))))))).))))).))))).)))))))))))))).)))).	-66.1	A1-m0052-5p	-	7	7	-	AAGAGTAGCGTTGATACACCGT	-
	novel_mir_18	Chr3:3825506:3825618:-	GGATGGGTGGATGGATGGATGGATGGATGGGATGGAGCTGATCAATCGTGCGGTCACCTCCGATGGGGACGTCGCACCCAACCATACATCTCACGCCCAGTCCAGCCCAGCCG	((.(((((((((((.((((((..(((.((((.(((((.(((((........))))).)))(((((....))))))))))).)))..)))).))...))).)))).)))).)).	-47.5	A1-m0053-5p	-	12	12	-	ATGGATGGATGGATGGATGGG	-
	novel_mir_52	Chr3:10135725:10135805:-	ATAGAATGTGATATTTCCTAATCCAACGAATCTAAACATGCATATCCAAATTCGTTGAATTAGAAAATGTTTCATTCTATC	((((((((.(((((((.(((((.((((((((..................)))))))).))))).))))))).)))))))).	-25	A1-m0054-5p	A1-m0054-3p	7	5	2	ATATTTCCTAATCCAACGAATCT	ATTCGTTGAATTAGAAAATGTTT
	novel_mir_53	Chr3:27558149:27558297:-	TTATCTCGTGTTCGCTCTCCATTTGTTATCTACAACTTGATGTTTATGTATCAAAGATGAGGAGACACAACAATGAAGAACAGGTTGGTGTTGCATTGATCATCATTCATCAGATTAAAGTGTAAGACAAGTAGAGGGTCACTGCTGAA	.......(((...((((((.(((((((...((((.(((((((..((((.((((...(((..((.((.((((..((.....)).)))))).)).)))))))))).)..)))))......)))))).))))))).))))))))).......	-30.2	-	A1-m0055-3p	6	-	6	-	AGTGTAAGACAAGTAGAGGGT
	novel_mir_54	Chr3:32457424:32457729:-	GCAGAATAATTCGATGATTAGATGAGGCTGCACATGGGATCGATGTTACATGGCTATATTGGTACTAGATTTCATCGTCCGGGTTTCCAAACAGATTATGTCTTCTGCATCAAAGCATTCAATGTTATCGTCGTCGAGGCTCTCACAATCATCATCATCATCATCCAGGTCCTCCTCACAGTCGATTTCTTCCTCATCATCGAAGATTTCATCATCTGGGTTCTCCTCGCAGATCTTGTCCTCTACATCATAGCATTCAATGTCATCGTCGTCGAGGCTCTCATCATCATCATCCAATTCTTCCTC	...(((.((((.((((((..(((((((((.......(((.(((((..(..(((.(((....))))))..)..))))))))((....))...((((........)))).......(((((.((((((((.(..((.((((...........................(((....))).......((..(((((.........)))))..))...(((((.(.......).))))).....)))).))..))))))))).)))))..(((....)))))).))))))...)))))).)))).)))...	-68.8	A1-m0056-5p	-	6	6	-	TCGATGATTAGATGAGGCTGC	-
	novel_mir_55	Chr4:5479935:5480032:+	GGATGATCTAACGGGACGTGGGGTGAGGTGGACCTGGGTTGATACATATTTGACGCTCGGAATACTAGGAGCACGCTGCGCTCCTAGTAGTATCTCTA	(((.(((....((((.(((.(((((.(((.(((....))).)).).))))).)))))))...((((((((((.......))))))))))..)))))).	-30.4	A1-m0057-5p	-	24	23	-	ACGGGACGTGGGGTGAGGTGGAC	-
	novel_mir_56	Chr4:13393623:13393776:+	AGTTCAAGCTACATGACTGTGTCAGGCGTTGAGATATTCTGCATTACTGCAGAGGAGTTGATTCCTTCAGTCAGCTTGTCTCCTTGGATGTGTAGAAATCTGCAAGATGGATGCATGCGAAGGCATAATGGCGCATAGCGATGTGGAAGGAGAG	..(((...((((((..((((((..(.(((((.(...(((((((....)))))))(((((((((.....)))))))))....((((.(.((((((...((((...))))...))))))).))))).))))).)))))))..))))))...)))..	-47.2	A1-m0058-5p	A1-m0058-3p	48	47	1	ACATGACTGTGTCAGGCGTTG	ATGGCGCATAGCGATGTGG
	novel_mir_57	Chr4:14190379:14190652:+	GTCACCTAGTACACATGCTCAGGACCAAGAACGGCATTTCCCTCAATATCTGATAGTTCTAATCCTTCTGCCTCCCAAGCCCAAAAAGCCCCATACACCATCCACGCAGGTAAAATTGAGAAAGGGAATCAACTATGCATAATTTATCACTTCAGGCTAGGGAAGCGGAAGAGCCATCGGATTTTATAGTCAAGCTATTTACACCTTGCCAACTACATCACATTTTGGCCACGAGTAGTGTGCAGTCATTCACCACATGAATACGCAGGTGGCA	(((((((.((((((.(((((.((.((((((..((((...........(((((((.(((((......(((((.((((.((((...............(((.........))).((((((.(...((.......))...).)))))).........)))).)))).)))))))))).)))))))...(((((...)))))........))))............))))))))..))))))))))).((.(((((.....)))))))..))))))).	-66.7	A1-m0059-5p	-	10	10	-	ACACATGCTCAGGACCAAGAA	-
	novel_mir_58	Chr4:17363428:17363576:+	ACGATGCATGGAGGTTCTTAAGTCTACCGAGAGTATTAGATCAAGTATGTACATCTTTCATTCTCGGGGAAATGGTCGATCAGTATGAACCATTGGTGCCGCATATACATAACTGAGCTGATTTCGGATACGTTGGAAATTCCGTTCGC	.(((...((((((.((((...((.(.((((((...((((.(((..((((((.............(((.(.((((((..((....))..))))))..).)))....))))))..))).))))))))))).))...)))).))))))))).	-33.9	-	A1-m0060-3p	5	-	5	-	TGATTTCGGATACGTTGGAAA
	novel_mir_59	Chr4:17418974:17419104:+	AAGGTTAATTTGGAGTTTACTGGCTAGACTATGATCGAAACCGTCACAGGCATATGCGAGGGGCATATAGGAATAGGAGGCATGTGGGAGTTAACTTGAACGAGATCAGATGGTCACTCTATACCCGCTTC	.((((.....((((((..(((..((.((((.((.(((((((..(((((.((((((((.....))))))...........)).)))))..)))...)))).)))).))))..))).)))))).....)))).	-26.5	-	A1-m0061-3p	11	-	11	-	CGAGATCAGATGGTCACTCTA
	novel_mir_60	Chr4:17419054:17419230:+	CATGTGGGAGTTAACTTGAACGAGATCAGATGGTCACTCTATACCCGCTTCTGCCGAGGCAGCTCTCCTCTAGAAACGACTAGAACCGCAAACTATGTAGGCCTGTATCTGGGGGGGAAAATGTTGCATCGTGTATGCATCCTGGGAAATCATCTAGTCACGATCGAGCCTCACGAA	..((((((.(....(((((.((.(((.(((((((..(((.......((...((((((.((((((((((((((((.((....((..(.(((.....))).)..)))).)))))))))))....))))).))).))).)).....)))..))))))).))).)).))))))))))))..	-53.4	A1-m0062-5p	A1-m0062-3p	25	11	13	GAACGAGATCAGATGGTCACT	AAATCATCTAGTCACGATCGA
	novel_mir_61	Chr4:17474107:17474276:+	CACCAAGCAATATGTTGTCTTCTTCACCAGTGCATGCAGATCCTTTTCTCTATAGCTACAATTTTAGGATGGGGAGACGTGAGGAATCAAAATATGCGAAGGATGTGCGACTCAGGAACAAGGTTAGTTACACAACCCACTGGTGCTGAAGTAGGGATGTAGGTTCCAGA	.....(((.((((.((..((((..((((((((..((((.((((((((((((((..(((......))).)))))))....(((....)))........))))))).))))............((((........))))))))))))..))))..)).))))..))).....	-45.2	-	A1-m0063-3p	67	-	66	-	CTGGTGCTGAAGTAGGGATGT
	novel_mir_62	Chr4:17663201:17663402:+	TTGTCCTCAATGGTGATAACAGGAGCTTGGAGCATGGGCGAGCCCATCCTCTCAATAACTTTATCATCATTAAGCCATTAAGTAGACAATGTGACTAGCAGTTCATTAAGCCTGCCATAGCATGCATTGCCATACATGCATGTTTCTTTTTTCTTGAAAAAGGGATTGCCGAGTTAATGTTTCCTAGCCTTGTCGAGGGAAA	.....((.(((((((((((.((..(.((((((.(((((....))))).))).))))..))))))))))))).))......((.(((((...(((((.(((((((..............(((((((((........))))))))).(((((((...))))))))))))))..))))).))))).))..((((....))))...	-53.2	A1-m0064-5p	-	24	24	-	TGGTGATAACAGGAGCTTGGA	-
	novel_mir_63	Chr4:21204394:21204633:+	AGAACAGATCCAACTTGTTAGACTTTTGCATGTATTTGGGGTGTAGGAAATAGTTAAAGGAAAGGTCCAGATTCCCCCCCCCCCAAAAAAAAAAAACTTTAAATTAAAGTTTATCTAGCACCCTAAACTTTGAAACCGAATATTCAATCCCCTCAATTTGACAATACCATTTATAGAACCACCTAAGGTGGTTTTGCATAGTTATTTTTATCTAATTGTTATATAAGTTGGATGAGTCTG	(((.(..(((((((((((..(((..(((.(((..((((((((((.(((..........((...((........))...)).............((((((((...)))))))).))).))))))))))..(((((........)))))..........................((((((((((...))))))))))............))).)))..)))..)))))))))))..)))).	-51.6	A1-m0065-5p	-	8	8	-	CAACTTGTTAGACTTTTGCAT	-
	novel_mir_64	Chr4:13025823:13026157:-	AGTTACTGTTATTCTCCTACTAGGTTTGTTCCTGGCCTCCTGGGCATGGCAGGAATTGGAAACTATTCAGGCACCTTCGATCACCTTGATCCCAGGTCTGGTTGATCTCAGGCCACGCAAGTTCCTTGGATGCTCACATATAGTGCCTGTCAGCCGCCCATGGCCCGCCGTGGCAACGTGCTGCAGACTTGGTAAAATGCTGTTTCACTCTTCGGTGTGATAAGCACACACTAATACGGATGCCCAGGAGAGACCCTAGCTGGTGGTGGCCTGGCCCGGCGGTGTCTCTACTATGCCTAGCGATTGGATAAATTGGTAGAGTGGATGCAGCTGAT	.((((((((.((((.((((((((.(((((((..((((((((((((((.((..((((.(....).))))..))......(((((...)))))(((((((((........(((((((..((((...))))..))............))))).((((((.((((((....))))))...)).))))))))))))).....((((...((((........))))..)))).............))))))))))).).))(((((((((((.((((((......))).))).)))))).).)))).....)))))))))))))).).)))))))).))))	-112.6	-	A1-m0066-3p	57	-	57	-	TGGATAAATTGGTAGAGTGGA
	novel_mir_65	Chr4:14571152:14571268:-	CATGTAGAAGACTGATTTGTCTTGGATGTTTGATGTCACGCCCAGAAATTCACGAACCAGAATTTCTAAGCTGAATATGCATTAAATCCCTGTCCAGGACCAGCCAGGGTATACAAA	..((((.....(((.((.((((((((((((((((((((.((..((((((((........))))))))..)))).....)))))))))....))))))))).)).)))....))))..	-34	A1-m0067-5p	-	125	125	-	ACTGATTTGTCTTGGATGTTT	-
	novel_mir_65	Chr4:15194360:15194476:-	CATGTAGAAGACTGATTTGTCTTGGATGTTTGATGTCACGCCCAGAAATTCACGAACCAGAATTTCTAAGCTGAATGTGCATTAAATCCCTGTCCAGGACCAGCCAGGGTATACAAA	..((((.....(((.((.(((((((((((((((((.(((((..((((((((........))))))))..)).....)))))))))))....))))))))).)).)))....))))..	-35.5	A1-m0068-5p	-	125	125	-	ACTGATTTGTCTTGGATGTTT	-
	novel_mir_66	Chr4:17214940:17215059:-	CTTTAATGTGAAGACATTAGCTAGAACGGAGAATGAAAGAAAACTCTCCTAGTGATGTCACCATATTTGACACCTAGCCGATCATATCTGTTTGAGCTAAACTTCAACTGTAATTAAAGG	(((((((((((((...((((((.(((((((..((((........((..((((.(.(((((.......))))))))))..)))))).))))))).)))))).)))).))....))))))).	-30.8	A1-m0069-5p	-	9	9	-	AAGACATTAGCTAGAACGGAG	-
	novel_mir_67	Chr4:17501349:17501479:-	AGGCATCAAATAGCCTGACTGTCATTGGGAATGGTGAAGCCACTTGTAATCTTCGAACAATACCAAAAAAAAAGGTGTACATCATGATGTAATAATCTGTATTCCCAACTAGCACGACTGAAGGGATGCCC	.((((((...((((.((.(((...((((((((((((....)))................(((((.........)))))....((.(((......)))))))))))))).))))).).)))....)))))).	-29.6	-	A1-m0070-3p	29	-	28	-	ATTCCCAACTAGCACGACTGA
	novel_mir_68	Chr4:17720762:17720925:-	TCTCCCGTCTGGCTCCTCGCCCATTCGGCCGTTCCGGGATTGGGATTCGATGACATTTCCCCATGACATTCTCGATGATTGAGTCACTACACGTGGGTCCAGGCTCATGTGGGTCCCGCATGTCAGTGACTCAATGTCACTGAGAATGTCACGGGTCACGGGGG	.(((((((..(((.....)))(((.(((..((((((....)))))))))))).......(((.(((((((((((.((((((((((((((((.(((((((((........)))).))))).))).)))))))))..)))).))))))))))).)))..)))))))	-74.8	-	A1-m0071-3p	49	-	49	-	ATGTCACTGAGAATGTCACGG
	novel_mir_69	Chr4:19205080:19205155:-	AGACATCGTCAATAGATTGTTTTAGGAGGGGTTATATTTTTCTCCTAGGTTGATTCACTATTGGAGAACTGATCTT	(((((((.(((((((((((.(((((((((((.......))))))))))).))))...))))))).))..)).))).	-19.9	A1-m0072-5p	-	8	8	-	AATAGATTGTTTTAGGAGGGGTT	-
	novel_mir_70	Chr4:27320822:27320938:-	TCAAGCACGATACGATGATGATGATGATGATGTAGGTTTGATCTAGTGAAAGCTACACTGTTTTCATATTCTTGATAAGAACCGTTTTTTGCTCAATGTCGTCTTCTGAGTGGTTGC	.(((.(((..((.((.(((((((.((((((....(((((.(((.(((((((((......)))))))....)).)))..))))).....))).))).))))))).)))).))).))).	-29.1	A1-m0073-5p	-	7	7	-	TACGATGATGATGATGATGAT	-
	novel_mir_71	Chr4:30081881:30082098:-	TCATTTTCACTTTGGGCTAGGTATTTTCACCTTTGTTGCAATTTGGACTACCCTAAACCACTTCTTCAGCACATCAATTCCAGCCCACCGGTGAACTCCTCCACCTCTTTGCAGATTCATATCTTTGCTGGAGGAGAGGCCAGACATGGCTAGGGAAGAGAGTTGAGGTGGTCCAAAGTGCAACAAAGTAAAAAATACCTGGTCCAAAGTAAAAGATT	...((((.(((((((((((((((((((...((((((((((.(((((((((((.............(((((...((..((((.(((....)))...((((((((.......(((((........))))))))))))).(((((....)))))..))))..)))))))))))))))))).))))))))))...))))))))))))))))))).))))...	-91.4	A1-m0074-5p	-	9	9	-	TTTGGGCTAGGTATTTTCACC	-
	novel_mir_72	Chr5:3086479:3086703:+	ACTAGTGAATGGAAGGTATCAGGAATTTGGATCCCTCTTTGTCATTCCTGCATGGAGTAGTTTTAACCTCTTGAATCTTGATGGTGCCTCCATTAGGTTGGTTTAAATAATAACCTAGCCTGTTGTCTCATCCAAGTCTCTAGATTTTATTTTGTATGCTTGCATGGCTCTAATCCATTTTCTGTTGTCAGGATCTGAATATCTTGAGCATCCAGTTGTGCTAGA	.((((((..((((..((.((((((((((((((((((((.(((.......))).))))...........(((.((..((((..((((....((.((((((((((........)))).)))))).))...))))))))..)).)))........((((....))))((((..................)))))))))))))).)))))))).))))....)))))).	-56.4	-	A1-m0075-3p	79	-	78	-	CTGAATATCTTGAGCATCCAG
	novel_mir_73	Chr5:13976637:13976715:+	GCACGGGATAAGTGGAAACCTGAGATAGGTTGGCCAGAAGACGCACGACTTATGCAGGTACGCTCACTTGCTCCTAAAC	....(((((((((((..(((((..((((((((((........)).)))))))).)))))....))))))).))))....	-27	-	A1-m0076-3p	5	-	5	-	CTTATGCAGGTACGCTCACTT
	novel_mir_74	Chr5:24965579:24965672:+	TCCCATCCCGTGCAAACTTGCAGTTCTTGTGGCCGAGCGAGGAAGGCGTGTTCTCTTCAGTTCGTCCGGGCGAAGAAACAGGCAGCAGGGAGGG	.(((.((((.(((...((((...(((((.((.(((.((((((((((.(....))))))..))))).))).))))))).))))..))))))))))	-34.7	-	A1-m0077-3p	21	-	21	-	GTCCGGGCGAAGAAACAGGCA
	novel_mir_75	Chr5:29688157:29688507:+	CTTACTCCTTATCTTTTCAGTTCTTGTTCCAATTCCGATTACGGTGGTGGCCCATGTAATTAAAAGGCCCATATATATATAAGCTGGCAAGGCCGCAAGACTGAAGAGGAGAGGCAATGCCATGCATGCAGATGAAGATCGCTTCTCTTGTATGTAAGTATGTATGTAGAAGGAAAATAAGGGGGAATATATATAGTAAAATAGTAATTCAGGAGTGGTGGGTGTTCCTGAAAGAGCTCATGGCCACAGGGCTTAACATAGAATCATCTTAATTGTGCGGAAGAAACAAAGCATGCACGCGCAGGAGGATGGAGTAGTAGAATGGATGGATGGATGGATGGATGAGGGTAG	.((((.((((((((.((((.(((((..((((.(((.(((((((.(((....))))))))))...((((((.((((((((((...(((((..(((......((....))....)))..)))))(((((((((..((((....))))..)))))))))..))))))))))................((((...(((......)))...))))....(((((.((.((((......)))).).).))))).)))))).........(((((((..(((((((..................))))))).))))))).......)))))))..)).))))))).))))))))))))	-96.7	-	A1-m0078-3p	29	-	29	-	AATGGATGGATGGATGGATGG
	novel_mir_76	Chr5:866809:866922:-	CCCTCCAGTCAAATATATTTGATGTTGGGACTTGGGAGAGCTAAGTCAAATGTATTTGACATTGGGTGAGCTAAACTTAGGTCTCCCAACATCAGATATATTTGACTTGAGTGA	(.(((.((((((((((((((((((((((((((((((..((((.(.((((.(((.....))))))).).))))...))))))..)))))))))))))))))))))))).))).).	-52.2	A1-m0079-5p	-	6	6	-	AAATATATTTGATGTTGGGAC	-
	novel_mir_77	Chr5:19141960:19142045:-	CGGGATCGTCCCTCGGACAGATTGATCAAGAAGAACTTGTTCTCATGACCAATAACTTCATTAATGAATCTGACGGCAACATCTCT	.(((((.((..(.((..((((((.((.((((((...(((.((....)).)))...)))).)).)).)))))).)))..))))))).	-18.6	-	A1-m0080-3p	11	-	11	-	CTTCATTAATGAATCTGACGG
	novel_mir_78	Chr5:24868441:24868653:-	AATCTATTTCTTTGGTTTTTTTTTCTGATAAATCCAAATTATTTTAAAGAATAGTAAAACATGTAAAATTTCAATGACCATTGAACATGATACGATCTGCGGTGAATAATCAAAAAAATTTCTATCTACTTTCTTATCAAAAGTATCCACCAGTTTATGCCATGTGCTGTGGTGACCAAAGGATGGATTGAGAGAAAACCGGCATGGTAGGCA	..((((((...(((((((((((((..(((..((((..(((((((....)))))))..............((((((....))))))..(((((.((.....((((((.............))).))).....)).)))))...((..((((.(((.(((...))).)))))))..))....))))..))))))))))))))))...))))))..	-37.6	-	A1-m0081-3p	8	-	7	-	ATGGATTGAGAGAAAACCGGC
	novel_mir_79	Chr5:25105550:25105704:-	TCAGCTGGAGCTTCTGTAGGATCAGGTTGTTCGTTTCAAATTCCCCATGCATCTCATTCTTAGGGCACCACTGGTTTCTCACAAATCAGAGTAAGGGAATGGTCTGAGATTTGCAGTTTCCGAATGCCTGGTTTGTCCAGAGTAGTAGCAGCCTT	...((((..(((((((..(((((((((.(((((..............((((......(((((((.((((.((.....(((........)))..))))..)).)))))))..)))).....))))))))))))))...))))..)))..))))...	-41.7	A1-m0082-5p	-	61	61	-	CTTCTGTAGGATCAGGTTGTT	-
	novel_mir_80	Chr5:25143438:25143654:-	TGAACTGGACCATACTCAGATCGACGCAGTTCACCTTGAATTCCCCATGAATCCCATTCTTAACTTAAGGGCATGCTATCACTTCTCGTCGTCGAACCACCGCCGGTACGCTGATTTCTCGTAGAAATGACCAGGGTTCGAATTTTGAGTATTGAGCGATCAGCGTGACTTGGAATATTGAGTGATCGAGTGTGACTTGGAACTTAGTGCTATTCAT	((((..(.(((((((((.((((.((.((((...((..(.((((.....))))(((.............)))(((((((((.(((((((...((((((((((...)))...(((((((((...))))))...))))))))))....))))....))).))).)))))).)..))...)))).)))))))))))))............)).)..)))).	-51.2	A1-m0083-5p	-	32	32	-	CATACTCAGATCGACGCAGTT	-
	novel_mir_81	Chr6:9542603:9542780:+	AGCAGGATGCTCTTGTTTTCACTGATGCCTCCTAGTCCTAGTATTTGGACTAGAAGATAAACAAAGATGGACAGATGGTTGAGGCCGGCAGGCATCTGGCATGCATGCTCCAAATTTGTAATAGAAAAACAAACTAACTAATGGAAGTGTGAGCTGAAAACTGAGGGCAAGATTTGAT	..((((.((((((((((((((((.((((.(((((((((........))))))).......(((((..((((((((((.(((.......))).))))))(((....)))))))..)))))........................)).)))).)).))))))).)))))))...))))..	-50.6	-	A1-m0084-3p	5	-	5	-	TGTGAGCTGAAAACTGAGGGC
	novel_mir_82	Chr6:9660121:9660214:+	TTGGCAGTATCTTGGGCAGGTGGCATTTGGAGGAAATTCTAGAAGCATCGTGTTGTAGTTTTCTCCGATGCTTCCTAGTCCTAAGATTTGAAGT	....(((.((((((((((((.((((((.((((((((..(((.((........)).))))))))))))))))).))).).)))))))))))....	-34.4	A1-m0085-5p	-	8	8	-	CTTGGGCAGGTGGCATTTGGA	-
	novel_mir_83	Chr6:11884876:11884953:+	TGTATAGGGGGGAGGGACGGGTGATCGCTAAGGGGAGGGGGAAGCGATCACCCGCCCCACTAGCAGTACCCCAAAAAG	......((((((.(((.((((((((((((.............)))))))))))).))).)).......))))......	-34	A1-m0086-5p	A1-m0086-3p	9	8	1	GGAGGGACGGGTGATCGCTAA	AGCGATCACCCGCCCCACTAG
	novel_mir_84	Chr6:17751138:17751350:+	TTCATCGAGTATTGGGCAATGGAACGACGTGCGGTAAATCACACCATTCCGTAGGTGTAAAATGTTATACATATATTTAGGTTTTATATTTCTCTATTTGTAAAGGGTTTCAGATGAATACAAGTGCTATTCGTAACAATAAAGGATGTTTTTCATTCCAATCTAAGACGTTGTATTTCTGTTTGTACAAATTTGTGCCTTGGCACCGATGAT	.((((((((.((((((..((((((.(((((.(..((....(((((........)))))....((((((..((((((((.(..(((((....((((........))))......)))))..)))))).)))..)))))).))..).)))))))))))))))))))......((((((........))))))....((((....)))))))))).	-42.6	A1-m0087-5p	-	18	18	-	ATTGGGCAATGGAACGACGTG	-
	novel_mir_85	Chr6:24616964:24617158:+	TTGTTTGGTGAACCAAAGAACACCAAAACCCTCTCGGATTGATGTTTTTTTAGTTGAATTCCTCCCATTCCAAAGGAATTGTAGATGATCCAGACACAAATTAAACAAGCTCCTTAAATCGTCAAATGCATAGGGAAAGGGAGGCACCGGGAATACAATTTCAAGGAATGGGATCTGTAGAGGGAAGACGAGCGT	...(((((((..........))))))).((((((((((((..((((((((.(((((.(((((((((.((((......(((...((((((............................)))))).)))......)))).)))).......))))).)))))..)))))))).)))))).))))))...........	-47.5	-	A1-m0088-3p	26	-	26	-	GGAATGGGATCTGTAGAGGGA
	novel_mir_86	Chr6:28312353:28312687:+	TCTGTCTCCTAATCTGCTGGTTTGTGTGGCGAGAGCGCAACTTCAGAATTTTTGAACAGAAAACGCGAACGGCGTTAGAACTCTTCAGAGATATCAAAGATGAAGTTGTAGTGTGGAGAGAGGCCAACATTTTGAGAGAAGTCGGCTAAAGGTCCCGCCTTTGGCGGTTTGCTTCGTTTTTCCTTTTCTTTCTGTTCTTCTCGACTGTTTAATGTCGATTTGTAAAACTTTTCATAACCTCTCCTGATCCTTAATACAATTTGGGCAGCCTGCCTTGGGCCGTCCCGGCTAAAAAAAACCACTGCTAATCAATCGGTGGATTCTTAGGTGACGCG	..((((.(((((((((((((((.(..(((((...((((((((((((((((((((((.((..(((((.....)))))....)).))))))))).)).....))))))))).))((((.((((((..........(((.((((((.(((((((((...))))))))).)...))))).))).....................(((((........)))))...................))))))(((.(((............))))))((......))((((...)))).........)))))))))..))))))))))))...)))).))))..	-94.6	-	A1-m0089-3p	20	-	20	-	CTAATCAATCGGTGGATTCTT
	novel_mir_87	Chr6:4740913:4740987:-	TTGGTGAGTTTGTCTTTCAACTGTGTAATTGCATTGACAATGTTATGAATAGTACTGAAGGGCATAAATTCAGTA	.((.((((((((((((((((((((...((.(((((...))))).))..)))))..)))))))))..)))))).))	-20.2	-	A1-m0090-3p	29	-	29	-	ATGAATAGTACTGAAGGGCAT
	novel_mir_88	Chr6:9574910:9575031:-	CTTCCTTCCCTAGAGCCAGCAGCACAAGTGCACAATTAGGGGTTAGGAGGCATCATGAAGCTCAACAAAGTGCTGCTCGTGAATGTTTGTTCTGCCTAGCACCTAAGACGTATGGAGGGTCT	...((((((.....((.....))....((((....(((((.((((((((((((((((((((.(......).)))..))))).)))).....)).)))))).)))))...))))))))))...	-32.5	-	A1-m0091-3p	5	-	5	-	CTGCCTAGCACCTAAGACGTA
	novel_mir_89	Chr6:9577737:9577853:-	CCATGAACTAAGACAGACCTGCATCTTCTGTACCATGGCAGTGCCCATCGATGCTGCTGTGTGGAAACTCGTTCTTTCTGTCCTGGTACCAGGCTTTGTGGAGTCTGTCTGCTATGC	.((((.....(((((((((((((...(((((((((.(((((.......(((..((((...))))....)))......))))).))))).))))...))))).))))))))..)))).	-38	A1-m0092-5p	-	23	23	-	AGACAGACCTGCATCTTCTGT	-
	novel_mir_90	Chr6:26473452:26473802:-	TCACTATTTAGTTGCCATTTTGTTGCACATTGCCATTCCTCTTCTCCCTCTCTCTGACTGCATGAGTACGTATGTACTCTGCTTAGAGCAAGTTTAATAGTACTAGCTAAATGCTCGTGCGTTACAACAGAATTCTAAAAGAGAACTTCATTTTTCTAAAACCATTCCCCATTGTCGACTCACGAGACTATAGATGCATCAATAAAATTTTATTGGTTAGCTCGCATGACAAAATGATTCCTAATCATGATCCTAACTTAAAGTTGCTATTAAATTTTCTAATGGATTTTTTGCGATTTCGATAGCCTGGTTTTCTTGAATGGCTGTGATGATTTGGCTGCCCCCTCGAGA	..........((.((((..((((((((....(((((((.......((....((((((..(((.((((((....))))))))))))))).(((((((((((((((..(((....((((((.(((((((..((((......((((((......))))))......))))....)))).))).))))))....)))......((((((....))))))(((((....(((((...............)))))...)))))....)).))))))))))))).(((.((((...........)))).)))...)).......)))))))))))))))..)))).))..........	-80.7	-	A1-m0093-3p	79	-	78	-	TGGCTGTGATGATTTGGCTGC
	novel_mir_91	Chr6:28330745:28330822:-	ACTATAGCTCTGCATGGGATTGGGATGTACCGGGACATTTAAGAATGATGGTTCGTTGGATTCCGCAAGTCTATCAGG	.((((((((.(((..((((((..((((.((((...((((....)))).)))).)))).))))))))))).)))).)).	-18.4	-	A1-m0094-3p	26	-	26	-	ATGGTTCGTTGGATTCCGCAA
	novel_mir_92	Chr6:28336875:28337042:-	GGGCATGAGAAGTGTCAGGATGTGCCGAAATGGAACTCTGATCTGATGCTACCATGGAGCTGGTCACGGACCATACGTGAGTGAGCCCTTGGCGAGTACGTTCATGGCTGGCGCTTGATTCATCGTTTCTTGGGAGGATCATGTCGGCATCCATGGCGCGATGGTGGC	.(.(((.(...(((((((((..((((((.((((..((((((((...(((((((((((((((.((((.((.((((......))).).)).)))).)))...))))))).)))))...))))............))))..)))).))))))))).))))))..).))).)	-60	-	A1-m0095-3p	192	-	187	-	ATCATGTCGGCATCCATGGCG
	novel_mir_93	Chr7:5730180:5730396:+	AAACTCCCGCTGCATCTCATGTTCTATCCTGATCCTCAATCCAACACCACTTTACTAAGCAAAAGTTATATGCGCGAAAATTGTTGTGTTTACGATACACAAAATTGCAAAACAAAGTGCTGCTGAATTCTATAAGAATGGGAAGCATTCAGAAAGCAAGAGTTTTTCCAAGAGAGGCAGTACTGCAGTAGAACAAGAGCATAGCAGCTTGGCTCCA	.....((.((((((((((.(((((((..(((.................(((((........))))).......((((...((((.(((((...)))))))))..)))).......(((((((((...((((.......(((((((.((((.........))))))))))))))).))))))))).)))))))))).))).)).)))))..)).....	-50.6	-	A1-m0096-3p	90	-	90	-	AGTAGAACAAGAGCATAGCAG
	novel_mir_94	Chr7:6434033:6434328:+	TATGTAGCCAATGTAAGAGGTCGGTCATGATTCTTGAAGCCCTGCGGTACTTCCTATTGAAAGAGATGGAGGCGGTATGTATAGCTGATTGATCCGTTTGTTGCCATAGGAGCAAACTTCTCTTTATCCCCCTTGACTCTTCAAACACCTTTGATAAGGTCTTTGCTAGAAGACTAGAGCACTAGACAAAAAAACAATGGGATTCACATGTTCTTGGTAGTTTGGCCAATTTGGTGTCTTCTCGGCATAGCATGGGCGACCTTCGGCATTGAAAATACTTTCTTGGTGCTTGCAGC	..((((((((((((..(((((((.(((((......((((((....))..))))...(((((.(((.(.((((.((.(((...((..(.(((.(((...((....))..))).))).)..))...))).)))))).)))))))))..(((((....)))))((.(((((((((((((((...((((((..((.((((.((.......)))))).))....))))))....))))..))))))).)))).))))))).)))))))..)))))).....(((.....))))).))))..	-73.9	A1-m0097-5p	-	163	162	-	ATGTAAGAGGTCGGTCATGAT	-
	novel_mir_95	Chr7:7071638:7071891:+	TACATTGTTTCGTCTATTTTCTCTTTTCTTGGATGAATCTATTGGCATTTGAGCATGTCTCATGGCCTATTAGATTTCTTTCTTAAGTGCTATCATAGTATTATAATAGGCTTAGTAGGTATCAGGAATAGAAGACCGAGCACATTCAGGCATGGTAGGATCAAACTCTGGTACAATTGTTCAACATGGAAACCACTGTCTCAGGCAAAGTCTATATGTTTCTCCAGAAGACGAGAATGGGTATTAGAAGATGT	.(((((......((((((((((((((...((((.((((.(((.(((.((((((((((...))))((((((((((......))...(((((((...))))))).)))))))).......((((((((....((..((((.((........)).))))....))....)))))))).........((((((...))).)))))))))....))).))).)))).))))))))).)))))))))........)))))	-56.6	-	A1-m0098-3p	64	-	62	-	CCAGAAGACGAGAATGGGTAT
	novel_mir_96	Chr7:8601158:8601338:+	GCTTCAGTTCCAGAAGCTGAACTGAATGCACCACATCTTTTAGTATTTTTTCTTCAGATCTTTCTGATAGACGTAATAAACTGGCGTCTCTGTAACACCTGAGCATAATAAGGTTTCATGTGATTTAGCTTGTGTAGCAAAAAGGATTATGCATGCATAGTGCAGTTTTCGGTCTGTAAGA	.((((((..((.(((((((.((((.(((((....(((((((............(((((....))))).((((((.........)))))).(((.(((((((((((((...........)))).)))))...)))).))).)))))))..)))))...)))).))))))).)).))).))).	-43.1	A1-m0099-5p	-	6	6	-	CAGAAGCTGAACTGAATGCAC	-
	novel_mir_97	Chr7:18555300:18555550:+	CCGTCGTCCTCGTCGTGGCCGCCCCCGCCTCCCCCGCCGCCGGACGCCTCGCAGGACCCCGATCTCGCGCCGCGGGAGGCCACCACCCCGCCGGCCTCCTCGTCCTCGCCGTCGCCGCGCGCGTCGGCCAAGGCGAGGGCGTCCGCCGCGGCGGCGGACGGGCTCGCCTCCGGGGTCGCGGCGCTCAGCTTCGAGGAGCCGCTCGGCGCCGGCGCCGGGGAGGACGGGTACGACTACGGCAAGGGCGACTT	..((((((((.(((((((.((..(((((((((((.((.(((((.((((..((.((..(((((.((.(((((((((((((((...........))))))).((((((((((...(((((....).))))...))))))))))...(((.(((.(((((......))))).))).)))))))))))..))..))).))..))))..))))))))))).))))))).))))..)).))))))).))))))))..	-163.7	-	A1-m0100-3p	12	-	12	-	AGGACGGGTACGACTACGGCA
	novel_mir_68	Chr7:538371:538488:-	GTGATATTCCCCTGTGACATTCTCGGTGACATTGAGTCACTGACATGTGGGTCCAGACACATGTGGGTCCCACATGTCAGTGACTCAATGTCACTGAGAATGTCACGGGGGAATGTCA	.((((((((((((((((((((((((((((((((((((((((((((((((((((((........)))).))))))))))))))))))))))))))))))))))))))))))))))))))	-102.7	-	A1-m0101-3p	51	-	50	-	ATGTCACTGAGAATGTCACGG
	novel_mir_98	Chr7:6418469:6418621:-	ACCAACTTGCACGCATTTAGAGATCCTTCATTGGACATGTACGTGAGCATGAGCACGAGCACGAGATTCATCATGTGGCAGAGCACGAGTAAGCTACCCCAATGGATGTAGTCGCAAGCTACCCAATCTAGGACTGGCAGCATGTAAACCTGG	.(((..(((((.((..((((...((((..(((((.(((((......)))))......(((....((((((((...(((...(((........)))...)))...)))).))))....)))..)))))..))))))))..)).)))))...)))	-37	-	A1-m0102-3p	170	-	168	-	CCAATCTAGGACTGGCAGCAT
	novel_mir_99	Chr7:6703796:6704079:-	GTGCAAACGGTCCGACCGGCGGCGACAGAACTACGTCGAGATTTCCATCGATTCGAGGGTAACTTTTATTTCCGCTAAAAGTTTTTGGGTTTTTGGTTTTCCTAACTATTCACTCCTCTCTGGTAGGCTTGGTTACTTGTATTCGATCCTACAGAAACTTACCTTAAAAAATGAATCTGAAAAAAAAACTCAAGAGTCCACACTAGTGCTATATATACTTTCATGCATTCGGCAAATAGCCTTGTCTTCTCGTACTCTGTTTTGCTTGTCTGGACTAGCTTAGT	........((((((((.(((((.((((((..((((..(((((..((.(((...))).)).((((((((.......))))))))..(((((((((((((((.......(((((.........((((((.(((.....(((....))).....)))...))))))........)))))........))))).))))))))))....(((((...............))))).(((.....)))..)))))..)))).))))))))))).))).)))))........	-62.4	-	A1-m0103-3p	27	-	26	-	ACTCTGTTTTGCTTGTCTGGA
	novel_mir_100	Chr7:9043284:9043401:-	GTCGATGTCAAGCAGATCATGAGCTCAGGAAGACTGCAACTACGGTGCAGGTGTGTTGCCCAGGAAGGCTCCATTCGCTCCAGATCGCTGACTCATGTGCCTGCTCACATCCATGGCG	((((((((..(((((..((((((.((((((...(((((.......)))))(.(((..(((......)))..))).)........)).))))))))))...))))).)))))...))).	-35.8	A1-m0104-5p	-	13	12	-	AGCAGATCATGAGCTCAGGAA	-
	novel_mir_101	Chr7:9524020:9524227:-	TTGAAATGGCCGAGAGAATAATTTAGGGCATCATAAGAGAAGAGAAAGGAACGAGCTTATGTGTGTTAGTGCGAGTGATGGGCCGTGGAGTAGATATATTTGTTAATTAGCTGAATTTCGATTACACCATGCTATTATCTGCCTGAAACGGGGGGAAATAAAAGTTTCTTGGGATTCCGGTTTTGATTTGTTCTTTTTCTTTTTCAGG	((((((.((..((((((((((.(((((((..((((((..................))))))....((((.(((.(((((((..(((((.((((....(((((((....))).)))).....)))).)))))))))))).)))))))..(((((((((((....)))))).....)))))))))))).)))))))))).)).)))))).	-46	A1-m0105-5p	-	9	8	-	CGAGAGAATAATTTAGGGCAT	-
	novel_mir_102	Chr7:18540269:18540523:-	TGAAACGGAGAGAGTAGATTTTAGGAAGGCAGCACCATACCTGCTTGGGAGCGTGGAGTTGGAAGAGGCGCACGGGGGGGGGGGGGGGGTCGAAGATGGGCATAAGCCCCTGCGACAATGGCCATCTCGCCCACGCCGGCCACCACCACCTCCGATTCCAAGCTCACCGTTGACTTCTTCATCCTCCCCTCCAACTCCAAGCAGGTATGGCGCAGCCTTCTTGCTGCTTTCCTAAAATCTACTCTCTCCGTTTCT	.((((((((((((((((((((((((((((((((((((((((((((((((((.(.((((...(((((((((.(((((((((((((((((((((..(.(((((....(((..((...))..)))......))))))..))))).)).)).))))).........))).)))))).)))))))...)))))))).....))))))))))))))...........))))))))))))))))))))))))))))))))).	-141.6	A1-m0106-5p	-	20	20	-	AGAGTAGATTTTAGGAAGGCA	-
	novel_mir_103	Chr7:19252986:19253054:-	TGCTGTTCGATGAACGACAATAGGATGACACCCTGTCAGTGTCCTCCTCGTCTGTTTCGACGAATGCAA	(((.(((((.((((((((...((((.(((((.......))))).)))).))).).)))).)))))))).	-22.3	A1-m0107-5p	-	20	20	-	TGAACGACAATAGGATGACAC	-
	novel_mir_104	Chr8:2462643:2462732:+	CTGGAGCAAACAACTGACCAATGAATGACTACGATAACGCCAATTGTGACTTCCGTCATGTTGCTTCATGGTTCAGTTTGGGTTCCTAGA	(((((((....(((((((((.((((((((................(((((....))))))))).))))))).))))))...))))).)).	-23.3	A1-m0108-5p	-	6	5	-	CAACTGACCAATGAATGACTA	-
	novel_mir_105	Chr8:2685181:2685356:+	TGTGCTGTGATTGACGAAACGTTGGGTGTGCTTTATGGATCAAATCGAGTGTTAATCCCCACTTGCTTCGGCTGGAATTGCAACTTGGCCACCAAGGACATTGAGCAAGAACGTTTACTTGTTCTGGTCCATGAACACATACTCCAAGCCATGCAGTGTTCGTCTCGATCTGCAAC	..(((...((((((((((.(((((.(((.(((((((((((((...((((((........)))))).....((.......))..(((((...)))))......(((((((........)))))))))))))))))............)))))).)))))))))))..)))).)))..	-50.6	A1-m0109-5p	-	5	5	-	TTGACGAAACGTTGGGTGTGC	-
	novel_mir_106	Chr8:17177018:17177258:+	GGTGTGCTAACAATATTGGATTACAGACTTCTGTCAAATGTGTGGTTTTAAAAAAATTAAGGTATTAAAACAATTTAATAACAATAAGTTTAGTGTTCTTTTGCTACTTCAGGGTAATGCATAAATATGATATTCTATGTTTTACCTTATAACGAATAGATTCTAATAATTGGTTTATTATCTGTACTTAGGATTACTCCTAACGTTTAGGAGTTTAATTGATCCAGTTTGTTGAGATTTG	.......((((((.(((((((((.(((((((((...(((((.(((((((...)))))))(((((.(((((.(((.....(((.....)))....))).))))).))))).(((((((.(((((((((...)))).))))).))))))).......((((((..(((........)))..))))))...(((((....)))))))))))))))))))...))))))))))))))).......	-47.9	A1-m0110-5p	-	5	5	-	CAATATTGGATTACAGACTTC	-
	novel_mir_107	Chr8:18588098:18588212:+	CAACTTGACAGCGATCAACCCAGTTCTCTGGCACACTGCCCCCGGTCGTTGGATGCTGGCCTCGTCAATGACCTGATTAATATACAGTAGAGCTGGGACGTTCGATATGCTTCTT	...........(((.(..(((((((((((((((...)))....((((((((.(((.......)))))))))))...........))).)))))))))..).)))...........	-32	-	A1-m0111-3p	17	-	16	-	CAGTAGAGCTGGGACGTTCGA
	novel_mir_108	Chr8:18672868:18672961:+	TGGATCGGCCACACAGAGTCGCGCAGTGGTACACTTTGGCCGGTCGAATGCCCTCGCCATTTTCTCTTGTGGTTGACTTTTTGTGTTCGATCCT	.(((((((.((((.((((((((((((.((.......((((.(((.....)))...))))....)).)))))..))))))).)))).))))))).	-33.3	A1-m0112-5p	-	146	144	-	ACACAGAGTCGCGCAGTGGTA	-
	novel_mir_109	Chr8:2458805:2458892:-	TCAAACTGATCCAGGGAATTGAGTGTATGGCGGCTAAGCTCATTGTAGCCACTACGGCCCTACATGTCAGCTCCATGGGTAGTAGGAA	((..(((.(((((.(((.(((((((((.((((((((.........)))))......))).))))).)))).))).))))))))..)).	-28.3	A1-m0113-5p	-	14	14	-	CCAGGGAATTGAGTGTATGGC	-
	novel_mir_110	Chr8:5732641:5732915:-	ACTAGCTTTGTGATCTTTGTTCAGCTCTGGTGGCCAAACTCCCAACACAATCTTAGCAAGAGCCATCTAATATTTACTCCATGGCTATGATCACCAGCTTGACACTTCATTCATTGTAAATGCTATATAATTTGATGGTTCTGCATAGTTCAGGGGAATACATAATAAAAGGTCCCCACATCTATTTATTTAGAAAGAGAACTTGATAGAAACAGGATATTGGGAAAAAAAAACTAAGTGGTTGTGATCAAGAAGAACAGGAGGTGATGAATTAG	.((((.(((((.((((((((((..((.((((.((.....((((((......((..(((.((((((((((.(((((((...((((..(((((((......)))....)))))))).))))))).))........)))))))))))..))....(((((...............)))))...((((......)))).......((((.......))))...))))))......((((....)))))).))))))..))))).))))).)))))))))	-55.7	A1-m0114-5p	A1-m0114-3p	14	2	12	CTTTGTTCAGCTCTGGTGGCC	TGATCAAGAAGAACAGGAGGT
	novel_mir_111	Chr8:6194772:6194842:-	AAATATGAACTTAGCGGGTCCTTACCCCTTTTATCGGATTAGAGCGGAAAGGACCCGCGGAATTCTTACTC	...((.(((.((.((((((((((.((.((((.........)))).)).)))))))))).)).))).))...	-25.7	-	A1-m0115-3p	6	-	6	-	AGAGCGGAAAGGACCCGCGGA
	novel_mir_112	Chr8:17584048:17584173:-	GCCAACTAGCGTAGCGCTGAATGCACGTTGGCACACCAACTCAGACTCCCATCCGTGGTGGCACGGCATATAGCGCTAGTTGACGTGGCGCTGAGGTGTCTAAATTCAGCGTCATACGATTTGGCG	(((((.((((.((((((((.((((.(((..((.(((((.....(.....).....)))))))))))))).))))))))))))..(((((((((((.........))))))))))).....))))).	-49.5	A1-m0116-5p	A1-m0116-3p	32	13	18	GTAGCGCTGAATGCACGTTGGCA	CACGGCATATAGCGCTAGTT
	novel_mir_113	Chr8:18027403:18027628:-	CTCTCTCTATAAAGGTGACGGAGCATATGTCTAAAAAATTTGGTAGCTCAAACTTAGTGTGATTAGGGGTGAAAATGGAGCGGGTATTTCCCGACCGCCCGCCCGACCCGAGGCTCGCGGGAGGAATATGGGAGAAAAAATGGGATACCGAGTTCGAATCCGAATTCGTTAGAAAAATATGGGTTACGAAACGGGAAGACATGTATCCGTCCGTATGTCCCGTATT	........(((.(.(.((((((..((((((((......(((.((((((((..((((((...))))))........(((.((((((...........))))))))).((((...(((.((.........)).)))......))))....((((((((....))))))))...........)))))))).))).....)))))))).))))))).).)))........	-62.8	A1-m0117-5p	-	7	7	-	AAAGGTGACGGAGCATATGTCTA	-
	novel_mir_114	Chr8:21478226:21478419:-	GGAGAGCTGACAGAAAGAGAAGTGAGCACGCAGCGGCAGCTGTATCATCATCATCATTTCATCTCTCTCTCTCTCTCTCTTCCATGGCCGCCGACGGCCTCTCTTTCTTTCTATCTAGCTATCCTGTCGAAGGGAAGATTGATAGATCGATGCAGTCTGGCCGCTGTGTGCTCACTCTCTTCTGTCAACTGCCA	((..((.((((((((.((((.((((((((((((((((((((((((((((((((................................(((((....)))))..((((((((((.................)))))))))).)))).))).))))))).)).)))))))))))))))))))))))))))).)).)).	-85.6	A1-m0118-5p	-	12	12	-	CAGAAAGAGAAGTGAGCACGCAG	-
	novel_mir_114	Chr8:21491228:21491421:-	GGAGAGCTGACAGAAAGAGAAGTGAGCACGCAGCGGCAGCTGTATCATCATCATCATTTCATCTCTCTCTCTCTCTCTCTTCCATGGCCGCCGACGGCCTCTCTTTCTTTCTATCTAGCTATCCTGTCGAAGGGAAGATTGATAGATCGATGCAGTCTGGCCGCTGTGTGCTCACTCTCTTCTGTCAACTGCCA	((..((.((((((((.((((.((((((((((((((((((((((((((((((((................................(((((....)))))..((((((((((.................)))))))))).)))).))).))))))).)).)))))))))))))))))))))))))))).)).)).	-85.6	A1-m0119-5p	-	12	12	-	CAGAAAGAGAAGTGAGCACGCAG	-
	novel_mir_115	Chr9:6762900:6763017:+	TTTTCAATCTAAAGACTGATAAGTAGATCGAGCAGATAGATGTAGTATTAGCTTCCACGTGTCACCTCCTCTACTCTTGAACTATATATGAGATCGTTGGCGGTAACTAGATAGAGCT	........((((.((((.(((.((((.(((((.((.((((.(..((....((......))...))..).))))))))))).)))).))).)).)).))))..................	-20.6	A1-m0120-5p	-	23	22	-	AAAGACTGATAAGTAGATCGA	-
	novel_mir_116	Chr9:9021971:9022217:+	CCGCCAGAGTTGTAGCATGTAGGGAAGGTTAAATCCATTTGGGTATGATGAAGTGTTATTCGAAAGGCTAGACGATTGGCAGCACATCTTGCTGCTAATTTGCCATTTTTTAGATAAAAAAGCCAAGCCTTCTAAAAGGAATGTTTGATGTACCTAGAGAAGTCACTACCAAACAGAAGAATTTGACTGTAATAACAGCTGCAGATTGATCCTTAAAATTCTGTAAAAGTGCTCAACGAAGTGGTGA	.(((((..((((.(((((.((.((((..(((((((.((((((((((((((((......)))....(((.....(((((((((((.....))))))))))).))).((((((((.((...((((....((((....))))...))))....)).)))))))))))).))))...((((....)))).((((....))))...))))).)))..))))..)))).))...)))))))))....))))).	-62.1	A1-m0121-5p	-	140	140	-	TGTAGCATGTAGGGAAGGTTA	-
	novel_mir_117	Chr9:9143270:9143391:+	TCATCATGAACAAAGCTTTGATGTGGAAGTTGATGAGATCAATGACTCGATCTAACTGAAAGTCTAGGTTGAATAGCTTGGGGCGAGCAGCAATGACTGATATCAAAGACTAGTCAAGTAAG	......(((....(((((((((((((..((((...(((((........)))))..(((...(((((((((....))))).))))...)))))))..)).))))))))).))..)))......	-26.1	-	A1-m0122-3p	6	-	5	-	AATGACTGATATCAAAGACTA
	novel_mir_118	Chr9:9156861:9157189:+	TGAAGCTTTGATGTGAAAGTTTGGGGGTGTTGTGGACAAAGAGATGAAAGAGATTTGGGGGTGCAAAGTTCCTATTGCTCTTGAAGAGCAATTTTACGGTCCTTGAGGAGGTACCATGAGGTACCATTTTTTCTATTGTAAATTTGGTATCTCTTGGTACCTAGGTACTATGAGGTACCATGAGGTACCAAATTTTACACTAAAAATTTAGTACCTCATGGTATCTCCTCAAGGATCGTAGAATTGCTCTCCTTTGAAAGTCAAGCATTTCCTGTTTTTGGCTGGGAGAGGGAGAATACCTTGTGCTGAACTCTTAGTTCAGAGAAATT	.....((((((..(((.((((((((((((((.(..............(((((...((((((.......))))))...)))))..((((((((((((((((((((((((((((((((((((((((.(..((((.((.(((((((((((((((((.((((((((..........)))))))).))))))))))).)))))).))))))..).))))))))))))))))))))))))))))))))))))))))(((((...(((((((((.....)))..))))))...))))).).)))))))....))))))).)))..)))))).....	-147.6	A1-m0123-5p	-	8	8	-	ATGTGAAAGTTTGGGGGTGTT	-
	novel_mir_119	Chr9:9324265:9324429:+	TTGGCTATTACAGAGAAATCCAAATCGCGTGCTTTTCTAGTGAAAGACAGGTATTATTCACATCATATTCTTTTTCGTGTGTTCATACTCGTCAGTGTTTAACATGTTTTTCCTTTTTTTTTACCGTGCTGATATGAGGTTTGCATTTTATTCTGTAATTTCTCT	..((..(((((((((((((.((((((.((((........((((((((.(((........................(((((....(((((....)))))...))))).....)))..))))))))........)))).)))))).)))))..))))))))..))..	-29.2	A1-m0124-5p	-	12	12	-	CAGAGAAATCCAAATCGCGTG	-
	novel_mir_120	Chr9:7932854:7933033:-	TTCTTTCCTTTTTGCTATCACCATCAGCTGACCTTTGTTTACCCCATGCGAAAAGTCTATTTTTACCCCTAGAATATATGAAATGCTTCTTAGGATGATAGTGCACTTCTAAGGGTAAAATAGACTTTTTCCATAGGGATTAACGGAGGTCAACTGACTGTGATGGCAAAAGAAAAGGCA	..((((..(((((((((((((..((((.(((((((((((...((((((.((((((((((((((.((((.(((((..(((...((.((....)).))....)))...))))).)))))))))))))))))).))).)))...))))))))))).))))..)))))))))))))..))))..	-74.8	-	A1-m0125-3p	12	-	11	-	TCAACTGACTGTGATGGCAAA
	novel_mir_75	Chr9:18868646:18868929:-	CGCGGTCGCTGCTCGCCGTCTCCGACTACTTCCACCGCCTCCGCACCCTCAGCTCCCTCTGGGTCACCCGCCCCAGGCACCCGCCTCACGACCACCAGCCGCCGCCGCACTCCGCCGCCCCCCACACCTGAGATCACCGCCGCCGGCAACGCATGCAAACACCGTAGCTCTTAGCTAGCAGCTTAGAGATATCGAGAGATCAGAAATTAAGCGATCGATCGAGAGAGGACGACGACTGTGAAACCCCCCATGGAATGGATGGATGGATGGATGGATGAACCGAT	..((((.....((..(((((((((.(((.(((((.........(((..((..(((((((.((((.....)))).((((....))))...........((((.((.((..(((.................))).....)).)).))))......(((.......))).((((.((((...)))).))))...((((..((((...........))))..))))))).))).)..))..)))..........)))))))).))))..)))))..))....))))..	-68.1	-	A1-m0126-3p	29	-	29	-	AATGGATGGATGGATGGATGG

## Sheet: A2
	miRNA ID	Location	miRNA precursor	Structure	MFE	Id(5p)	Id(3p)	count	count(5p)	count(3p)	mature miRNA (5p)	mature miRNA (3p)
	novel_mir_1	Chr10:13988525:13988776:+	CAAATCTTTCAGAAGATGGAACAGATTGGCAAACATAAAAGCAAAGCAAAGTGGAACAAGTCAAAATTCATATCTCCAAATATTGTGAGGTGAAGACTGAATCTTGCGCATCAGATGTATCATTCAAGATTAGACACAGATATCTTCTGTCACATAGAGTGTCTAGGCATTAAAGCCACGGCAGTTGATAGCCCGTTAACGCCTTAGTTTTGTACTCCTTCAGTCCCAATCTTCTGTATTTCAGAGGAACTT	....(((((..(((((((((..(((((((...........(((((((............(((....(((((..((((((...))).)))))))))))(((((..(((((....).))))..)))))....(((((((........(((((...))))))))))))(((......)))..(((.((((((.....)))))))))...)))))))............)))))))))))).)))).)))))....	-51.5	A2-m0001-5p	-	7	7	-	AGAAGATGGAACAGATTGGCA	-
	novel_mir_121	Chr10:11181595:11181721:-	GACTCATATTTGGCTGATGAGGCAGGTCGGACAGGAGTAGGACGATGGGGTCGGACGTATAGCGCGATTCAAAAACATACTCTCCATCCGAAGTCCAAGACCTATTTCTTTTAGCACCACAACCAAA	............(((((.((((.(((((((((.(((...(((..(((((((((..(.....)..)))))).....)))..)))...)))...))))..))))).))))..)))))............	-31.6	A2-m0002-5p	-	14	13	-	TGGCTGATGAGGCAGGTCGGACA	-
	novel_mir_2	Chr10:14220313:14220408:-	AGACATCTGGATATCACTTCTGATGTATTCCTTGGTGTAAGCTACTGAGATTTGGTATGGTAGTTTCTGTGGCACTTGCACAAGGACCAGTTTTAT	......((((((((((....))))))..((((((.((((((((((.((((((.........)))))).)))))..)))))))))))))))......	-28.1	-	A2-m0003-3p	93	-	93	-	TCTGTGGCACTTGCACAAGGA
	novel_mir_3	Chr11:4123111:4123226:+	ACGCGCTGCCGCCGCCGGCGTACCTGCTCCGGCACGGCGAGGCCGACGCCGCCGACCTGCACGCGGCGGCGGAGGAGAGGCGCGGGGAGTGGTAGTACGGCGACGGCGAGGCGCGC	.((((((..(((((.((.((((((((((((..(.((.(....((..((((((((.(......)))))))))..))...).)).).)))))))..))))).)).))))).)))))).	-70.4	-	A2-m0004-3p	33	-	33	-	GGGAGTGGTAGTACGGCGACGG
	novel_mir_6	Chr11:26390432:26390548:+	AGGATCTTTTTGATGCTGTCTAACTAACTCGTTTCATGTTTCATGTTTTATCTTAATTGTAGCTGACATAAGAGCTCAATGTTGTGCAACTTGGTTTCGTAGCGTCAAAGATACACA	......((((((((((((...((((((...(((.((((.................((((.((((........))))))))..)))).)))))))))...))))))))))))......	-23.5	-	A2-m0005-3p	9	-	9	-	CAACTTGGTTTCGTAGCGTCA
	novel_mir_9	Chr11:12147701:12147994:-	GTTGGTCCAATTAATCGTCGATCAGGCACAATTAATTGTCCGATCAGAGCACCTATCGATCACCTTTTGAACAATTCTTAGGGTTTAGCACATGTGAATATGTGCTACTACTGCTGGTTGCTTTATACTAGGGCAAGTGACCATCTTGCCATCAATTATTAGTGCTGTGATTGCTTTATACTATGCACTATATAGAATATAGGTTCTAGTATTCATAGTACTGATCAGGTCGACTAATCGAGGCTGATCGACGATTAATTTTCCTGGTCGGTCCCTTGGTGATCAGGATCAATC	........(((((((((((((((((.(.(.((((.(((.((((((.((.......))))))(((((..(((...)))..))))).(((((((((....)))))))))......(((((........)))))((((((.......)))))).......(((((((((((((.((((..(..(((((..((....))..)))))..)..)))).)))))))))))))..)).))).)))).).).))))))))))))))))).(((((((((.(.....).)))))))))......	-102.6	A2-m0006-5p	-	17	17	-	TTAATCGTCGATCAGGCACAA	-
	novel_mir_10	Chr11:16493226:16493515:-	ACCGGCACCGATTTGTGTGTCTGTAGCGGTGTGTGACAATTACATCATGGATGAGCTCGCTTGTTCCCGTGAAATCGTCACCGAGTTCGCGCAGCATGTACGCGGACTCTGCCCAGAAATCTACTACCAACGAGAACTCGTTGCAAGTTCGTTTTCTGCGCACGCAAGTCATTTACTAATTGTTATATTTTGGGACGAAAGGTATTTTGGGACGGAGGGAGTAGTAGATATACGATTTTTATTAAAACTGTGTTCAGTACAGACTGACAGGTACACACATTCACTAATTA	.........(((.(((((((((((..((((.((((.........((((((..((((......))))))))))..(((((.(((((((((((.........)))))))))(((.((((((...(((..((((((....))))))..)))....)))))).))).((((............))))........)))))))...........(((((.((....(((((((.........)))))))...)).)))))..)))).))))))))))))))).))).........	-79.7	-	A2-m0007-3p	13	-	13	-	CAGACTGACAGGTACACACAT
	novel_mir_122	Chr11:19402805:19402951:-	CTCTATCTATAAGTGGAATAGAATAACCCGGTTGAAGTGTAATGATCATATATTTTGTAATGCATTGTATGTCATTGATTCTTTCCCAATAAATGAAAACTTTTTCTGTAAATACTGCGTATTTGATTCCATTATCATATGATAATA	...(((((((.((((((((.(((((.(.((((.((((.(((((((.((((((...(((...))).))))))))))).)).))))..........((((....)))).......)))).)))))).))))))))...))).))))...	-23.2	A2-m0008-5p	-	17	17	-	AAGTGGAATAGAATAACCCGGT	-
	novel_mir_12	Chr11:24920007:24920082:-	AAGCATGATCAATGGGATTGAGGGGTACCAGGAAAGAACACCTTCCTAGATTTCTCAGAACGGTTGTTGTTCTGCT	.((((.(((((((.(..(((((((((.(.(((((........))))).))))))))))..).))))..))).))))	-22.2	-	A2-m0009-3p	27	-	27	-	CTAGATTTCTCAGAACGGTTG
	novel_mir_123	Chr11:26348042:26348381:-	TGTTCAGTGTTTTCTTATTCACTTTTTGTTATGATGGGCTAGAAAAGGGCTTGGCAATCCCAATTACTGAATTAACCATGTACACCATGCGAAAATGGGAAGAACACCGGACATAGGATTTCGATCAATAACCTTCATTGACACAATGAACAGGTTATCGTCGCTACCAATGAGACAAACAGTAGCATTATCTCTCTTTCACAGTTCTTTCTTCAGAACACAAACCCTTGCTGCGGCAAGAGAACTGAAGATCACAACAGAGTATCATATGAGAGAAAGACCACCTCCGTTATCGTTTCGTGTTTGCTAATGACAAGAAGAATGTGGCGAGCACAAAATC	......((((((..((((...(((((((((((.((((........((...((((.....))))...)).......))))..((((...((((.((((((..(((..((.......))..)))(((..(((((((((((((...))))))..))))))).)))(((((..............)))))....(((.((((((((((((((((((.(((..............))).))..)))))))))..(((.((......)))))...))))))).))).....)))))).))))...))))......)))))))))))...)))).))))))......	-73.5	-	A2-m0010-3p	31	-	30	-	ATGACAAGAAGAATGTGGCGA
	novel_mir_13	Chr12:2441355:2441614:+	GCCCGCGGCGGTGGGGCGGCGGTGGTGGCGGCGAAGGTGATGGACAGGAAGGAGCTGGCCGGGAGGAACAAGGAAGGGCGGGCGAGAACCGAGAGGGAGATCCTCGAGGCCGTCGACCACCCCTTCCTCCCGCGCCTCTACGGCGTGGCCGAGGGGGATCGCTGGTCCTGCCTCCTCACCGAGTTCTGCCCCGGCGGCGACCTCCACGTCCTCCGCCAGCGGCAGCCGCACCGCCGCTTCACCGAGTCCGCCGTCAGGTA	(((.((((((((((((((((((((.(((((.((..((((..((((.(((.(..((((.(((((.(((((.((((((((..(((((...((..((((.....))))..))...))).))..)))))))).(((((((.....)))))))..((((((((((...)))))).))))........)))))..)))))))))..).)))..))))..))))..)).).)))))))))))))))))))......)))))..))).	-149.5	A2-m0011-5p	-	8	8	-	GTGGGGCGGCGGTGGTGGCGG	-
	novel_mir_124	Chr12:9434249:9434520:+	CGAGCACGCGGTCGCGAGGAATCCTGCCGGGCTTCTTTTCCTCTCAAGTCAACGACGCGCGTCACACCACACGTCTAGGTAGACGTTTGTCCATGAACGATCGCGAGGCCCCGCCGCGACCGCCCGCGGCAGCGATCATCGGACGGCGCCGAGGGGCACACGGAAGGATCGGATGGTCCATGCGCGCGCTGGCAGCCTACGCAAGTAACGCAACCCGTGCGACTGCCGGCCGCGTCGCCGCGAGGAGATCAGGAGGCAGGAGCGCGTGCGTT	...(((((((.((.....)).(((((((...(((..(((((((.(...(((..((((.(((((..(((.........))).))))).))))..)))....(((.(..(((((.(.(((.((((((((....)))......)).)))))).).))))).).)))..(((((....)))))..((((((((((((((..(((....))).((((.....)))).))))))).)))).))).).)))))))..))).))))))).)))))))...	-112.5	-	A2-m0012-3p	11	-	11	-	GAGGAGATCAGGAGGCAGGAG
	novel_mir_14	Chr12:14576174:14576431:+	CAGGACTAAAGATGATCTATTAAAAATCATGTAGTCTCGTTCTGCTTATAAACCGGGACTAAAAACCATCTTTAGTCCCGATTTTTATTGCAACCGGGACTATTATGGTTTTGGTCGACCGGGCAAAGATAATTTCTCCACTAGTGTAAGTAGCAATGGTACTTGAAGCATATAGCTAACAATCTCTTGCTGCATCCATTCTCATCTGACGAAGGACGATGAAAATGCTGAGCACGGACGAGCTAGGAGATTGTCCTA	.(((((..................((((.(.(((.(((((((((((((....((((((((((((.((((...((((((((..............))))))))..))))))))))))..))))....(((.....)))............(((((((.((...(((.(((.....)))..))).)).)))))))...((((.(((((...........))))).)))).)))))).)))))))))).).))))))))).	-75.9	-	A2-m0013-3p	5	-	5	-	CTGAGCACGGACGAGCTAGGA
	novel_mir_15	Chr12:15176235:15176307:+	TGCCATGGAACCTGCCTGATTCCTGTGCTGTATTGAATAAAAAGTTAGTAGAGGCTTGCAGGTGGAAATGGCG	.(((((...((((((..(...(((.(((((.(((........)))))))).))))..))))))....))))).	-26.5	-	A2-m0014-3p	14	-	14	-	AGTTAGTAGAGGCTTGCAGGT
	novel_mir_16	Chr12:15283679:15283799:+	AGCGTACAGTAGATGTGACTGTGTATTGCATGGTGGTTGGATTGGGAAGCATCAGGAGCTCTTATGGATGTCACCTTCCCTCCAAACCAATCCAGAGATCGCGGACAGGTTGCCATGTTGC	.(((.(((...(((.((.(((((.(((...(((((((((((..(((((((((((((....)))...))))....))))))))).)))))..)))..)))))))).)).)))....))))))	-36.5	A2-m0015-5p	A2-m0015-3p	24	1	23	TGTGACTGTGTATTGCATGGTGG	TCCAGAGATCGCGGACAGGTT
	novel_mir_18	Chr12:17949899:17949979:+	GTCGTCGTCGAACCATCGCGTCGCGTCCCCGTGTCTGTCGAGCGAGATGGATGGATGGATGGATGGATGGGACCGGACGAG	.(((((......(((((.((((.(((((...((((((((......))))))))...)))))))))))))).....))))).	-34.8	-	A2-m0016-3p	13	-	13	-	ATGGATGGATGGATGGATGGG
	novel_mir_20	Chr12:18190759:18190899:+	TACATGTGTAGATCTAATGATGCGTTCATGCTAGTTTTCATCTGTAATGTCATGATTTATTTATGGAATAGATTAAATCATTATATGTCTATAATCTCAACACTTTGTTCCAGCTAGCAGAACTATCGCGTTCCACATGAA	..((((((..((.(...(((((.((((.((((((((......(((((((...((((((((((...))))))))))...))))))).............((((...))))..))))))))))))))))).).))))))))..	-31.8	-	A2-m0017-3p	21	-	21	-	CAGCTAGCAGAACTATCGCGT
	novel_mir_21	Chr12:18292723:18292803:+	TGATCTGGCACAAGGCAACCTGTGGAGGGCACAATATGTATTTCCAAAACATGTATTCTAGAGTTTGTCATGGCCAGCAAC	....(((((.((.(((((.((.(((((.(((.....((......)).....))).))))).)).))))).)))))))....	-23.9	A2-m0018-5p	-	33	33	-	CAAGGCAACCTGTGGAGGGCA	-
	novel_mir_125	Chr12:24414525:24414688:+	ATAAGAGCCCCACTGCGATGCTCTCTACTGGTAATAGAAAACAATCTGAACCATTAATCTTATTTCATCGAATGGTCTATATCTATTTGTACTATTACCCCAGTTGGTGGTAGTAGAAACATGTATGGGCATTATTATCCAAAGATGTGTCGAGGGGTATAATC	......(((((....((((((..(((...((((((((....((.((((((.............))))..)).))((((((((...(((.((((((((((......)))))))))).)))...)))))))).))))))))...))).)))))).)))))......	-40.2	-	A2-m0019-3p	5	-	5	-	ATTATCCAAAGATGTGTCGAG
	novel_mir_27	Chr12:24867698:24867939:+	CAATTCTCTGATTGCATCTGAATACTACTACATTTTGAATTCAGAGAAGAGGGATGATAACATCCTGGTGCCTCCTAAGCCTACCATAGCAACCCACTGGCTTGGTCCTCGTAGCCTTTTGTTTCTCTCCACCATTTTGTAGCGCTTGGGCTCACTCATCTCATCTTTTATGGAGCGAAAACCGCAGCATGTACAATACCATATATGAATGCATAGTATAATTCAATGCAGTATATGAATGC	..((((....(((((((.(((((..(((((..(((((..((((.(((((((((((((..........(((...(((((((((((...(((((......((((..(....)..))))..)))))...............)))).)))))))..)))))))))).)))))).)))).)))))...(((.((((((........))))))..))).)))))..))))))))))))....))))..	-58.1	A2-m0020-5p	-	7	7	-	ATTGCATCTGAATACTACTAC	-
	novel_mir_126	Chr12:4018238:4018596:-	CCTAGCTTCCATAGTTATTAGAACCGGACCGGACATTGAGCCGGTCGTAGCCTCGGTTCACAGTTTGATTGGTTCAACCGGCTAAACCGTCGGCTCAACACGGTTCATATAGCCTGAGATATGCACTATTATCACCACACCCAACATAGCTCAGTGGTGGGGTTCCTCGTAGGAAAGGAGGAGGTTGAGGGTTCGAATCCCACCCCACAACATTTTATTGCATATTTTCTTCTCTCCATCCCACCAGCGCCTCTTCTCCTCAGGTCCCCACCAGCGCCCCTGGTTTCGGTTTTTTCCGGTCGGACTGCCGGTCCGGTCCGGTCCCAATAACTATGCCAGCTTCACGCCAAGCTCAAGGT	...((((..((((((((((.(.((((((((((((..((((((((........))))))))((((((((((((...(((((((((((((((.(......)))))))....))))(((((.((((.....................)))).)))))((((((((..(((.(.((((.((((((..((((.(((...((..............((......))..............))...)))..)))).)))))).)))))))).))))))))..(((...)))..)))))....))))))))))))...)))))))))))).).))))))))))..))))....(((........)))	-132.5	A2-m0021-5p	-	11	11	-	ATAGTTATTAGAACCGGACCGGA	-
	novel_mir_127	Chr12:14944199:14944386:-	CTGTGGTAATGCTAGATCGGCTGGTCAAACAGTGTGCAGGTGACAAGACTGTGCTACGACTGAGGACCATGCGGCAGTGTGGGGAATATCAATTGGGACAGAAGATACAATGAAGATGAGTAAAATTGACGTTTTGAAATTCTTCTCCTTCCAGAGGACTGATGGCTGGATTGGATTGGAAACTAAAT	..((..((((.((((.((((((((((...((((((((((((......))).))).)).))))....((((((....))))))..........((((((.((((((.....(.((((((...........)))))).)...))))))..))))))..))))...)))))).))))))))...)).....	-41.5	-	A2-m0022-3p	22	-	22	-	ACTGATGGCTGGATTGGATTG
	novel_mir_31	Chr12:18102039:18102221:-	CAGCCTTGTGCCTAGGCTTCCATGTGGTTAGGGGTCGATAGTAGAGCTTCTGCTCACCATCCATGCCTGAAGAAGGGAACAGTGGACCTAGTCCAACAACCAATGTGGTTAATTTCCCCCACAAAATCTGTAAAAAGTGAAACTTTGTTGCAACTTTCATGGAAGATAGGCTCTCTTTGGCTT	.((((..(.(((((..((((((((.(((((((.((.(((.((.((((....)))))).))).)).)))))....(((((...(((((...)))))..(((((...)))))...)))))..........((((((((((...))))).))))).))..)))))))).))))).).....)))).	-58.2	-	A2-m0023-3p	50	-	50	-	ACTTTCATGGAAGATAGGCTC
	novel_mir_128	Chr1:11352760:11352993:+	TTAACTTTTTAAGTCCTTTTTCACCATAAAATACCTTAGCTTTTAAAATGGTCCAGTAACATGATCCTTATGGTGACGTTATACTCTACTGTATTCAACAAAATGTACTTCTTAGGAGTCTGTATCAATGATAATCACAATCGTACTGTACCACTCAATACAACCATAAAGATGTTATTGTACCATTTTAAAAGGTAAAGAGATTTTACGGCGAATAAGGACTTAAAAAAGTTA	.(((((((((((((((((.(((.((.((((((..((((.(((((((((((((.((((((((...((.(((((((.(((((((((......)))).......))))).........((((..((((..(((((.......)))))...)))).))))......))))))).)))))))))).))))))))))))).).)))..)))))).)).))).)))))))).)))))))))	-69	-	A2-m0024-3p	6	-	6	-	TTTTACGGCGAATAAGGACTT
	novel_mir_129	Chr1:20457838:20458137:+	CACACAGTACACCGTGATTGTTTTGCCGGTTCATCCAGGAGATGTAGTGCTGCAGCCTTGATCAGGTGTGGCGTATCCATGAAAACAGCCAGCGGATGCCAAGCGCAGGCACTGTCCTACACGGCGTATCTGAATGTTTCATCGGTTCCTGATGCCTCCGAAGCCTAACTAGCTTGATGGACATTGTCTTTAGTTTTCATGGAAGTGCCAAGCTAGCCATGCATAATGCACAGTGCATGACAAGCAAAATAAATAGCGTATAGCAGGTTTCAGTGCCGGAGACAACGTGGGGGCTGGGGG	....((((...(((((.((((((..(((((.((((.....))))....((((.(((((..........(((((..(((((((((((.....(((.........)))(((((.(((((....(((.(((((.((((.........))))..)))))..)))((((.......))))...))))).)))))...)))))))))))..))))).(((.(.(((((((........))))))).).)))..........((.....))))))).))))))))))))))))))))..))))....	-87.7	A2-m0025-5p	-	6	5	-	ACCGTGATTGTTTTGCCGGTT	-
	novel_mir_130	Chr1:26584247:26584398:+	TGTGTGTAGTTACTTGGGGTGAGGATCATTTACCATAATGTTACTACCATTACAGTCATTAGTTTATAGGTTTCACCCTTCTATTATCTCACATGTCATTACCTATAATGATAGTGTTATTATGGTAGAGGATGTGAACCCAATTACTTGAT	.(((.(((((.(((((.((((((.....)))))).))).)).))))))))....((((..(((.....((((.(((.((((((((((..(((.((((((((....))))))))))).....))))))))))..))))))).....)))))))	-40.5	-	A2-m0026-3p	14	-	13	-	ATGGTAGAGGATGTGAACCCA
	novel_mir_36	Chr1:34261987:34262054:+	CTTTTACGCTCCAATTGGGTTCGATCGTGTGAGTGTACCCGCGAATCAAGCGGATAGGAGTAAAAAGA	(((((..(((((.(((.(.((.(((((((.(......).)))).))))).).))).))))).))))).	-19.8	A2-m0027-5p	-	19	19	-	CCAATTGGGTTCGATCGTGTG	-
	novel_mir_131	Chr1:1352636:1352952:-	TCATAAATAAGGCCTAGTTTAGATCCCCTGGCAAATTTTTTCACCATGTCACATCAAATGTTTGGACACATACATAAAATATTAAATATACGAATAAAAACTAATTACACAAATTACGTGTAAATTGCGAAACGAATCTTTTAAGCTTGTTGTTCAGGGTATGTCTGACTAAGTTGCTTATCTCTGAACTAGTGAAGGAGGAAGGACGAGTATTGTGGATTTCCTTTGGGTTGGGAATGGGTTGAATCCATTTTTCTACACTTGGTTTGGATTGGTTTGGGTGCTCTGTGAGTGGATTGGATTGGTTTGTTTTCTGC	.((.(((..(((((.((((..(((((.((.(((........((((.((((.((.........)))))).............................(((((((((...(((((((.(((((..((((((.((...((((((...(((...((((((((((.((((.....))..)).)))).)))))).....)))...))))))...)).))))))....((........))((((((((...))))))))...))))).)))))))))))))))).))))...))).)).))))).)))))))))..))).)).	-66.3	-	A2-m0028-3p	12	-	11	-	TGTGAGTGGATTGGATTGGTT
	novel_mir_43	Chr2:10612135:10612407:+	CACAGTCGTGCAATGCCAATCGTCTGGACACATTTACGGAAGGGATCTTGTGCAAGCACAAGTTTATAAGTGGCATTTTGTCTTCCTGGTACCTACCATTCCCTTACCATGTTTTCTCTGTACTCCTCTCACACATAATCTAAGCTAAGCTGTTGATTTGCAAAGGAGATTTCCAGAATCAGTCAAGCTAGCAATACAAGTCCGTACCGTACCCATATATATATGTGCAACCGCTCTTCTCTGTCAGACATGTTGGCGTGTGATATATCTTGG	((.((..(((((((((((((.(((((.(((....(((((.(.((((((((((....))))))..((((((.(((((..........((((....))))..........)))))..)).)))).....................((((.(((((((((((.....(((....))).))))))).).))))))).......)))).).)))))..(((((....)))))..............))))))))..)))))))).)).)))..)))).	-54.4	A2-m0029-5p	-	5	5	-	CAATGCCAATCGTCTGGACAC	-
	novel_mir_46	Chr2:27148134:27148282:+	GGGCTTATCAAAGGGGCGCTTACTGAGAGTTCTTTGGCATTCTGTCCACCTCCTTGTCGAATCCTCAGAGACAGAAATCTCATATCTGTTGATCTTGGAGGTGGGCATACTGCCAATGGAGCTGTGTAGGCCTCCCTTTGTAAAACCCA	(((.....((((((((.((((((....((((((((((((...(((((((((((..(((((.......((((......)))).......)))).)..)))))))))))...)))))).))))))..)))))).)))))))).....))).	-68.4	A2-m0030-5p	-	5	5	-	AAGGGGCGCTTACTGAGAGTTCT	-
	novel_mir_132	Chr2:31486980:31487054:+	TACTACAATTTTCTTCTTCAATTCTCAATTCTTATATATATAAAAGAATTGAGAATTGAAGAAGAAAATTGTAGT	.((((((((((((((((((((((((((((((((..........))))))))))))))))))))))))))))))))	-43.8	-	A2-m0031-3p	18	-	17	-	AAAGAATTGAGAATTGAAGAAGA
	novel_mir_47	Chr2:20249942:20250211:-	GACCGCAACTGTAAGGATGACAGAGAAGCATCGATGTTGTCCACCTCTGCGTTTCAACTAGGTACATCTCTTGGGGCCGTACCTATGATTTGTGGATTGCTCAGTATTCATGGTAGCACACATGCCCACTGCACACGCTGCAAAATGAAGATGAACACGCTTTAGGCTTTCGCGTAAGACAACAGGATTCTTAGTGCCGCCCATTTCTATAGTTAAATTGGACATAAAACGCGTATGAGCATGTTGGTTAGTCCCTTGTCAGTTGTCACC	....((((((((((((.((((.((.(.((.(((((((((((((..((((((..(((..(((((((..(((...)))..))))))))))..)))))).((.(((...(((((.(((((.....(((.....)))...)))))...)))))..))).)).......(((...(((.(((((.........))))))))..))).................))))))......)))).))))).).)).))))...))))).)))))))....	-65.4	A2-m0032-5p	-	15	15	-	GTAAGGATGACAGAGAAGCAT	-
	novel_mir_48	Chr2:20404010:20404112:-	AAAGCTGCGGATTTGCCTCCGGTCAGGTACGGAACAAATATAATGCGTGCAGACGGCGATGAGATGCGTGCCATACTTGATCGCGGCAAGGATACGCCTTACA	......(((..((((((..((((((((((.((.((..((...((.(((.......)))))...))..)).)).)))))))))).))))))....)))......	-30.3	-	A2-m0033-3p	5	-	5	-	ATACTTGATCGCGGCAAGGAT
	novel_mir_133	Chr3:11275953:11276107:+	TGAAAGCCAAATGGAAGATACGGATCAGGAGCTATGCACCGTTGCGGTAAGAACAGCGAGTTATCTGCTATATCTCTTTATGTTTGAGCTTGCGCACTCAAGCTAGCGCTAGCTATTATTGTGATCTCTTGTGTTGATCTTCTTTTTATCTGTCT	.((.((..(((.(((((((.(((..((((((.........(((((((((((((((..(((.(((.....))).)))....))))).((((.((((..........)))).)))).))))))))))))))))..)))))))))).)))..)).)).	-35.7	A2-m0034-5p	-	10	9	-	ATGGAAGATACGGATCAGGAG	-
	novel_mir_134	Chr3:29382335:29382441:+	GCAGCTTAAATAGCAAGAGCGTCCCACCACCTCCAGCCGAGCTCAGCAGCGCGAGCTTGTAACCCGAGCGGGGGCATTAAGGTGGTGTGGACGTTGCCGTATGGCTG	.(((((......(((...((((((((((((((...(((((((((.((...))))))))....(((....))))))....)))))))).))))))))).....)))))	-47.3	-	A2-m0035-3p	14	-	13	-	TTAAGGTGGTGTGGACGTTGC
	novel_mir_50	Chr3:32511910:32512120:+	ACCACATGCAAGTGCTATCATTTCACCTACATCGTTTATTAGCTACCAAAATAATTTTTTGAAAGAACTTTTATATATGTGTTCATAGCAATTTAAAAGCTAATGATGAAAAATAAATTACAGCAAAAAAATCAAAATTAACTCTTTAAGAAATATCGGAGCTGGTGAGAAGCAAAGAAAACAAATGTAGAGAGAATGGTCGTGCGATGGA	.(((..((((.(.(((((..((((..((((((..((((((((((.((...(((.(((((((((.((((............)))).((((.........)))).((((.......................))))..........)))))))))))).))))))))))))...............)))))).)))))))))).)))).))).	-32.5	-	A2-m0036-3p	11	-	11	-	ACAAATGTAGAGAGAATGGTC
	novel_mir_18	Chr3:36271499:36271667:+	AGGAGAGGTTATGGATGGATGGATGGATGGGATTGGATTCCCCTTCCCCCGCCCCCAACTAAACAAACAACTAGTATATGCTAAGGGCGGCGCAACGCTAATACTCCTCCCTAGTCCTCCTAGGCTACTCCTCTCCTCCCTTCCATCCATTCACCCTTCGCTTCATCCG	.((((((((...((.((((((((((((.((((..(((.......))).((((((.................((((....)))).))))))...................(((((.....)))))............)))).)))))))))))).))...))))).))).	-55.8	A2-m0037-5p	-	13	13	-	ATGGATGGATGGATGGATGGG	-
	novel_mir_135	Chr3:1675721:1675961:-	CAATCTATGAGCCATCAGTCACATCATGAGCAATTCTTATCACGAATAATGTCAACAGTTTAAAACCATCATTTTGCATTCACTTTACCCTCTAATTCAAATATTCAATTAGATTGTGTTTAGTTCCTAAAATTAGGGAGAAGTTTGAGGAAAGTTGATAGTTTGGAAAAAAAAGTTAGGAGTTTATGTGAGTAGAAAAATTTTAGATGTGATGTGATGTGATGTGATGGAAAGTTAAGTT	...........(((((((((((((((((.(((.((((..(((((...(((.(((((..(((.((((.((((((((.(....(((((.((((((((((.........))))))).....(((((...)))))....))).)))))....).)))).)))).)))).)))......))).)).)))..)))))..))))..........)))..))))))))))).))))))...........	-46.6	-	A2-m0038-3p	10	-	10	-	GTGATGTGATGTGATGTGATGGA
	novel_mir_18	Chr3:3825506:3825618:-	GGATGGGTGGATGGATGGATGGATGGATGGGATGGAGCTGATCAATCGTGCGGTCACCTCCGATGGGGACGTCGCACCCAACCATACATCTCACGCCCAGTCCAGCCCAGCCG	((.(((((((((((.((((((..(((.((((.(((((.(((((........))))).)))(((((....))))))))))).)))..)))).))...))).)))).)))).)).	-47.5	A2-m0039-5p	-	13	13	-	ATGGATGGATGGATGGATGGG	-
	novel_mir_136	Chr3:27557836:27558084:-	CATTGCTTTTCTTCAACATAGGATTCAGGAGTCACATATCTGCTCTATAAAATGACTAAAGTAGTAGGTGCTAAAATAGTTGCAACACTTCATTCTCAATAAGTTCATCCTAGTTTCTCTCGAATACCTGAGAAAAGTTATACACGACGTAATTCTACTAAAAAGAGGGATTTGTTTGCTTGTGTGGAAGGTTAGCCTGCCTGTGTTTTTCGCAATACCTCCTATACCCATGTTGGACGAAATGTGAGA	..((((.((((((((((((.((....(((((.....((((((((((.((.......)).)).))))))))........((((((((((....((((((....((((...............))))...))))))......(((((((.((((((((.((....)).))))).....))))))))))..((((......)))))))))....)))))..)))))...)).)))))))).)))).))))..	-50.5	A2-m0040-5p	-	8	7	-	CTTCAACATAGGATTCAGGAG	-
	novel_mir_55	Chr4:5479935:5480032:+	GGATGATCTAACGGGACGTGGGGTGAGGTGGACCTGGGTTGATACATATTTGACGCTCGGAATACTAGGAGCACGCTGCGCTCCTAGTAGTATCTCTA	(((.(((....((((.(((.(((((.(((.(((....))).)).).))))).)))))))...((((((((((.......))))))))))..)))))).	-30.4	A2-m0041-5p	A2-m0041-3p	31	30	1	ACGGGACGTGGGGTGAGGTGGAC	TGATACATATTTGACGCTCGGAA
	novel_mir_56	Chr4:13393623:13393776:+	AGTTCAAGCTACATGACTGTGTCAGGCGTTGAGATATTCTGCATTACTGCAGAGGAGTTGATTCCTTCAGTCAGCTTGTCTCCTTGGATGTGTAGAAATCTGCAAGATGGATGCATGCGAAGGCATAATGGCGCATAGCGATGTGGAAGGAGAG	..(((...((((((..((((((..(.(((((.(...(((((((....)))))))(((((((((.....)))))))))....((((.(.((((((...((((...))))...))))))).))))).))))).)))))))..))))))...)))..	-47.2	A2-m0042-5p	-	8	8	-	ACATGACTGTGTCAGGCGTTG	-
	novel_mir_137	Chr4:14883477:14883670:+	GCGTGAAGTATCCGGACTGAAAGAGATCGGGAAAAAAAAACGTAAACATTTGCCTGCGTGTGTGTGCGGGGTGGGCTTTGCATCTAGCTAGGCTGTGCAACCTTGGGCCTGGGCCTGTCCCTGGCGCCCCACGGCCTTTCTGTAATATGTAATATGTACCGCAGTCCGCAGTACTGGTGAATGGCCTCTTCACG	.(((((((..(((.((((.....)).)).)))..............((((((((...(((((((.(((.((((.(..((((((.(((..((((((((.......(((((((((......))))).))))))))))))..)))....))))))..).)))).).)).)))).))).))))))))....)))))))	-65.5	-	A2-m0043-3p	9	-	8	-	CAGTCCGCAGTACTGGTGAATGG
	novel_mir_138	Chr4:17419253:17419469:+	GCTTTCAAGTATATATTTGATCAGGGATTCAACATGCCTAAGTGTCATTATGCATAATGCATGACATATAGTCAAAGAACAAGAAAAAGAATGGGTAGTACCAAAATGCTAGGTAAGTGTGATGCATCAGAGACAGCCTTGCGTGGCTGCTGTACAGGATTGAATCATTTTGTGGTTTGGACTGGAATTTAATGTTATCAAGAGTGTGCCATCATTT	........((((((.((((((((.((((((....((.(((.((((((...((((...)))))))))).))).)).................(((......)))..((((..............)))).(.((.(((((......))))))).).(((..(((((((((...))))))))).)))))))))..))..)))))).))))))........	-47.4	A2-m0044-5p	-	5	5	-	ATATATTTGATCAGGGATTCA	-
	novel_mir_61	Chr4:17474107:17474276:+	CACCAAGCAATATGTTGTCTTCTTCACCAGTGCATGCAGATCCTTTTCTCTATAGCTACAATTTTAGGATGGGGAGACGTGAGGAATCAAAATATGCGAAGGATGTGCGACTCAGGAACAAGGTTAGTTACACAACCCACTGGTGCTGAAGTAGGGATGTAGGTTCCAGA	.....(((.((((.((..((((..((((((((..((((.((((((((((((((..(((......))).)))))))....(((....)))........))))))).))))............((((........))))))))))))..))))..)).))))..))).....	-45.2	-	A2-m0045-3p	13	-	13	-	CTGGTGCTGAAGTAGGGATGT
	novel_mir_139	Chr4:17498331:17498495:+	GAACATTCCGTGTCACGAGCAGAAAGAGCCAGTTTGCTTATCTGAAGCCGGTCCTTCAGCCAAAGGAGATTCACAGAGAGCGCCAGATTCTTCTAGTATTCGAAGGCTACTGAGCTTGTTCAGCTCAGACCGTACGTACGCCAATCTTTTCAAAGGGTGTGTTTA	........((.(((..((((.(((.((((((((..((((..((((((......))))))....((((((.((.............)).)))))).........)))).)))).)))).))).)))).)))))....((((((.............))))))....	-40.9	A2-m0046-5p	-	7	7	-	TGTCACGAGCAGAAAGAGCCA	-
	novel_mir_62	Chr4:17663201:17663402:+	TTGTCCTCAATGGTGATAACAGGAGCTTGGAGCATGGGCGAGCCCATCCTCTCAATAACTTTATCATCATTAAGCCATTAAGTAGACAATGTGACTAGCAGTTCATTAAGCCTGCCATAGCATGCATTGCCATACATGCATGTTTCTTTTTTCTTGAAAAAGGGATTGCCGAGTTAATGTTTCCTAGCCTTGTCGAGGGAAA	.....((.(((((((((((.((..(.((((((.(((((....))))).))).))))..))))))))))))).))......((.(((((...(((((.(((((((..............(((((((((........))))))))).(((((((...))))))))))))))..))))).))))).))..((((....))))...	-53.2	A2-m0047-5p	-	6	6	-	TGGTGATAACAGGAGCTTGGA	-
	novel_mir_64	Chr4:13025823:13026157:-	AGTTACTGTTATTCTCCTACTAGGTTTGTTCCTGGCCTCCTGGGCATGGCAGGAATTGGAAACTATTCAGGCACCTTCGATCACCTTGATCCCAGGTCTGGTTGATCTCAGGCCACGCAAGTTCCTTGGATGCTCACATATAGTGCCTGTCAGCCGCCCATGGCCCGCCGTGGCAACGTGCTGCAGACTTGGTAAAATGCTGTTTCACTCTTCGGTGTGATAAGCACACACTAATACGGATGCCCAGGAGAGACCCTAGCTGGTGGTGGCCTGGCCCGGCGGTGTCTCTACTATGCCTAGCGATTGGATAAATTGGTAGAGTGGATGCAGCTGAT	.((((((((.((((.((((((((.(((((((..((((((((((((((.((..((((.(....).))))..))......(((((...)))))(((((((((........(((((((..((((...))))..))............))))).((((((.((((((....))))))...)).))))))))))))).....((((...((((........))))..)))).............))))))))))).).))(((((((((((.((((((......))).))).)))))).).)))).....)))))))))))))).).)))))))).))))	-112.6	-	A2-m0048-3p	27	-	27	-	TGGATAAATTGGTAGAGTGGA
	novel_mir_65	Chr4:14571152:14571268:-	CATGTAGAAGACTGATTTGTCTTGGATGTTTGATGTCACGCCCAGAAATTCACGAACCAGAATTTCTAAGCTGAATATGCATTAAATCCCTGTCCAGGACCAGCCAGGGTATACAAA	..((((.....(((.((.((((((((((((((((((((.((..((((((((........))))))))..)))).....)))))))))....))))))))).)).)))....))))..	-34	A2-m0049-5p	-	35	35	-	ACTGATTTGTCTTGGATGTTT	-
	novel_mir_65	Chr4:15194360:15194476:-	CATGTAGAAGACTGATTTGTCTTGGATGTTTGATGTCACGCCCAGAAATTCACGAACCAGAATTTCTAAGCTGAATGTGCATTAAATCCCTGTCCAGGACCAGCCAGGGTATACAAA	..((((.....(((.((.(((((((((((((((((.(((((..((((((((........))))))))..)).....)))))))))))....))))))))).)).)))....))))..	-35.5	A2-m0050-5p	-	35	35	-	ACTGATTTGTCTTGGATGTTT	-
	novel_mir_140	Chr4:17488209:17488303:-	GGCCGTGGCCAAGTGTGTAATGTTGAACGGACTGCTTCTCTGGCCCTTGTCACGTCTTCTTGTTCAGCATTGGATTGGGCTTGGCGTCAGGACCA	((((...(((((((((.((((((((((((((..((.....((((....)))).))..)).)))))))))))).))...)))))))....)).)).	-32.8	A2-m0051-5p	-	21	21	-	AAGTGTGTAATGTTGAACGGA	-
	novel_mir_67	Chr4:17501349:17501479:-	AGGCATCAAATAGCCTGACTGTCATTGGGAATGGTGAAGCCACTTGTAATCTTCGAACAATACCAAAAAAAAAGGTGTACATCATGATGTAATAATCTGTATTCCCAACTAGCACGACTGAAGGGATGCCC	.((((((...((((.((.(((...((((((((((((....)))................(((((.........)))))....((.(((......)))))))))))))).))))).).)))....)))))).	-29.6	-	A2-m0052-3p	10	-	9	-	ATTCCCAACTAGCACGACTGA
	novel_mir_141	Chr4:18145360:18145640:-	CCTCGCAAGTCGAGCGGGTTGGAAGATGGATCCGAAGAATTACAGTTTTTAGAACAAAACACAAATATTGTAAAGAAGGTTGAGATGATAACTAAGCTTTGGGCGACGCACTGTGGTTGATCTAGAAACAAGTGTACCTTGGTGCAGCGTATTGAGCAAGTGGCATTTCCTGGTGCCTCTTTTTCCAAACACTCTGATCAGGTGCATATAGGTCTCATTTGCTTATGCAAGCTAGAATAGTTGCCTCTTTCATGCCACTTCTGTAACTGGGTTGCTGTGGC	..(((((.(.(((.(.(((((((((.(((....(((((......(((((((((.(((..((((....((((...((((.(((..........))).))))..)))).....)))).))).)))))))))..((((((((.(((.(((.((...(((.(((.((((((....)))))).))).))).....)).))))))))))))))((((((.......))))))((((.(((...))))))).)))))....))))))))..)))).).))))))))).	-74.3	A2-m0053-5p	-	14	13	-	CGAGCGGGTTGGAAGATGGAT	-
	novel_mir_142	Chr4:21089993:21090305:-	TTCCGCGTTTCTAGGGAGTACTAGAGTTGATGCAGCTTTGTCCCAGATGCCTTCCATGCCTATATGCCTAAACTAGAGCGATCGATGCATCATCGTCTCGACGGTCGTTGGAAAATTTAGTTCCCAACTCACTAGGATATATATAGTTTGTTGTCTGGTCTCACTATCACCTCGGTCTTGTATTTCTTTTATAATCATAGCACTATATATACTGGACGCAAAGGAAAATCATGTGTGTTTCACATCTTTTTTTTAGTCCAACAAATATTCCAATGCAGAGGATTATATCTGTATTCTCTAAAAACTTCAGGAT	.(((..((((.((((((((((.(((..((((.(..(((((.....(((((..((.(((((((...........))).)).)).)).)))))(((((....)))))((((((((.((((.(((((..........)))((((((((((..(((((..(((.........)))......(((((.......)))))..))))))))))))))).(((((..((((((((...(((((.....))))).)))))))).))))))))))).))))))))))))))))))..))))))))))))).))))....))).	-67.7	A2-m0054-5p	-	5	5	-	CTAGGGAGTACTAGAGTTGAT	-
	novel_mir_143	Chr5:1441474:1441705:+	TCATGTCCTCCTCGTCGTAGTCGTCGTCGTCGTCGACGTCTTCCTCTTCTTCTTCCCTCACCTCCTCTTGCTCTTGCACGGATGCCATCTCTTCTTGCCTCTCCTCGTGCTGCGCTTCCGCCGCCGCCGACGCCTTCTGCGACTTGCGGGGAGAGGGCGCGGCGATCTCCGCGGCGGCGGCGGCGTCCTTGGTCGGCGAGGGCGCGGCGGCGACGGGGAACCTGGAGGTGAG	((((.(((((((((((((.((((.((((.((((((((...............................(((....))).(((((((..........((..(.......)..))(((.((((((((((((.((((((((.(.........).)))))))))))))......))))))).))))))))))...)))))))).)))))))).))))))))))....))).)))).	-108.5	A2-m0055-5p	-	5	5	-	CTCGTCGTAGTCGTCGTCGTC	-
	novel_mir_72	Chr5:3086479:3086703:+	ACTAGTGAATGGAAGGTATCAGGAATTTGGATCCCTCTTTGTCATTCCTGCATGGAGTAGTTTTAACCTCTTGAATCTTGATGGTGCCTCCATTAGGTTGGTTTAAATAATAACCTAGCCTGTTGTCTCATCCAAGTCTCTAGATTTTATTTTGTATGCTTGCATGGCTCTAATCCATTTTCTGTTGTCAGGATCTGAATATCTTGAGCATCCAGTTGTGCTAGA	.((((((..((((..((.((((((((((((((((((((.(((.......))).))))...........(((.((..((((..((((....((.((((((((((........)))).)))))).))...))))))))..)).)))........((((....))))((((..................)))))))))))))).)))))))).))))....)))))).	-56.4	-	A2-m0056-3p	35	-	34	-	CTGAATATCTTGAGCATCCAG
	novel_mir_144	Chr5:18668026:18668219:+	GATACGCACCTAAAATGGCATCCTCTCTTTCCAATCACGGGACATGCGCCAGAGCATCAAATCATTCACAATTAAACTTTCAAGATTTCGCTGCGCTGCGCCGAAAGTGACTTCGTCGCTTTGTAATTAATAAAGCAAATAGTTATGCAGCATGTGCCGCTGAAAGTGACGGTGTCGCTTTGCAATTATTGTCA	((((......((((.(((((((.((.(((((......(((.(((((((((((.(((.((((((....................))))).).))).))).)).....((((((.....(((((((.....)))))))....))))))...)))))).)))..))))).)).))))))).)))).......)))).	-47.8	A2-m0057-5p	-	13	13	-	TAAAATGGCATCCTCTCTTTC	-
	novel_mir_145	Chr5:21329056:21329150:+	GTTGCCTTGTTGGCTAGTACGGACAACGTGAGGAAAAGAAAACGGGTTACTCTTTGGACTTGTCATGTGTTCAGTACGCGGATGAACATGGAAGT	....((.((((.(((.(((((((((.(((((.(((((((...........)))))....)).)))))))))).))))..)).).)))).))....	-23.4	A2-m0058-5p	-	39	38	-	TGGCTAGTACGGACAACGTGAGG	-
	novel_mir_75	Chr5:29688157:29688507:+	CTTACTCCTTATCTTTTCAGTTCTTGTTCCAATTCCGATTACGGTGGTGGCCCATGTAATTAAAAGGCCCATATATATATAAGCTGGCAAGGCCGCAAGACTGAAGAGGAGAGGCAATGCCATGCATGCAGATGAAGATCGCTTCTCTTGTATGTAAGTATGTATGTAGAAGGAAAATAAGGGGGAATATATATAGTAAAATAGTAATTCAGGAGTGGTGGGTGTTCCTGAAAGAGCTCATGGCCACAGGGCTTAACATAGAATCATCTTAATTGTGCGGAAGAAACAAAGCATGCACGCGCAGGAGGATGGAGTAGTAGAATGGATGGATGGATGGATGGATGAGGGTAG	.((((.((((((((.((((.(((((..((((.(((.(((((((.(((....))))))))))...((((((.((((((((((...(((((..(((......((....))....)))..)))))(((((((((..((((....))))..)))))))))..))))))))))................((((...(((......)))...))))....(((((.((.((((......)))).).).))))).)))))).........(((((((..(((((((..................))))))).))))))).......)))))))..)).))))))).))))))))))))	-96.7	-	A2-m0059-3p	15	-	15	-	AATGGATGGATGGATGGATGG
	novel_mir_79	Chr5:25105550:25105704:-	TCAGCTGGAGCTTCTGTAGGATCAGGTTGTTCGTTTCAAATTCCCCATGCATCTCATTCTTAGGGCACCACTGGTTTCTCACAAATCAGAGTAAGGGAATGGTCTGAGATTTGCAGTTTCCGAATGCCTGGTTTGTCCAGAGTAGTAGCAGCCTT	...((((..(((((((..(((((((((.(((((..............((((......(((((((.((((.((.....(((........)))..))))..)).)))))))..)))).....))))))))))))))...))))..)))..))))...	-41.7	A2-m0060-5p	-	19	19	-	CTTCTGTAGGATCAGGTTGTT	-
	novel_mir_80	Chr5:25143438:25143654:-	TGAACTGGACCATACTCAGATCGACGCAGTTCACCTTGAATTCCCCATGAATCCCATTCTTAACTTAAGGGCATGCTATCACTTCTCGTCGTCGAACCACCGCCGGTACGCTGATTTCTCGTAGAAATGACCAGGGTTCGAATTTTGAGTATTGAGCGATCAGCGTGACTTGGAATATTGAGTGATCGAGTGTGACTTGGAACTTAGTGCTATTCAT	((((..(.(((((((((.((((.((.((((...((..(.((((.....))))(((.............)))(((((((((.(((((((...((((((((((...)))...(((((((((...))))))...))))))))))....))))....))).))).)))))).)..))...)))).)))))))))))))............)).)..)))).	-51.2	A2-m0061-5p	-	10	10	-	CATACTCAGATCGACGCAGTT	-
	novel_mir_86	Chr6:28312353:28312687:+	TCTGTCTCCTAATCTGCTGGTTTGTGTGGCGAGAGCGCAACTTCAGAATTTTTGAACAGAAAACGCGAACGGCGTTAGAACTCTTCAGAGATATCAAAGATGAAGTTGTAGTGTGGAGAGAGGCCAACATTTTGAGAGAAGTCGGCTAAAGGTCCCGCCTTTGGCGGTTTGCTTCGTTTTTCCTTTTCTTTCTGTTCTTCTCGACTGTTTAATGTCGATTTGTAAAACTTTTCATAACCTCTCCTGATCCTTAATACAATTTGGGCAGCCTGCCTTGGGCCGTCCCGGCTAAAAAAAACCACTGCTAATCAATCGGTGGATTCTTAGGTGACGCG	..((((.(((((((((((((((.(..(((((...((((((((((((((((((((((.((..(((((.....)))))....)).))))))))).)).....))))))))).))((((.((((((..........(((.((((((.(((((((((...))))))))).)...))))).))).....................(((((........)))))...................))))))(((.(((............))))))((......))((((...)))).........)))))))))..))))))))))))...)))).))))..	-94.6	-	A2-m0062-3p	11	-	10	-	CTAATCAATCGGTGGATTCTT
	novel_mir_87	Chr6:4740913:4740987:-	TTGGTGAGTTTGTCTTTCAACTGTGTAATTGCATTGACAATGTTATGAATAGTACTGAAGGGCATAAATTCAGTA	.((.((((((((((((((((((((...((.(((((...))))).))..)))))..)))))))))..)))))).))	-20.2	-	A2-m0063-3p	11	-	11	-	ATGAATAGTACTGAAGGGCAT
	novel_mir_89	Chr6:9577737:9577853:-	CCATGAACTAAGACAGACCTGCATCTTCTGTACCATGGCAGTGCCCATCGATGCTGCTGTGTGGAAACTCGTTCTTTCTGTCCTGGTACCAGGCTTTGTGGAGTCTGTCTGCTATGC	.((((.....(((((((((((((...(((((((((.(((((.......(((..((((...))))....)))......))))).))))).))))...))))).))))))))..)))).	-38	A2-m0064-5p	-	5	5	-	AGACAGACCTGCATCTTCTGT	-
	novel_mir_90	Chr6:26473452:26473802:-	TCACTATTTAGTTGCCATTTTGTTGCACATTGCCATTCCTCTTCTCCCTCTCTCTGACTGCATGAGTACGTATGTACTCTGCTTAGAGCAAGTTTAATAGTACTAGCTAAATGCTCGTGCGTTACAACAGAATTCTAAAAGAGAACTTCATTTTTCTAAAACCATTCCCCATTGTCGACTCACGAGACTATAGATGCATCAATAAAATTTTATTGGTTAGCTCGCATGACAAAATGATTCCTAATCATGATCCTAACTTAAAGTTGCTATTAAATTTTCTAATGGATTTTTTGCGATTTCGATAGCCTGGTTTTCTTGAATGGCTGTGATGATTTGGCTGCCCCCTCGAGA	..........((.((((..((((((((....(((((((.......((....((((((..(((.((((((....))))))))))))))).(((((((((((((((..(((....((((((.(((((((..((((......((((((......))))))......))))....)))).))).))))))....)))......((((((....))))))(((((....(((((...............)))))...)))))....)).))))))))))))).(((.((((...........)))).)))...)).......)))))))))))))))..)))).))..........	-80.7	-	A2-m0065-3p	35	-	34	-	TGGCTGTGATGATTTGGCTGC
	novel_mir_144	Chr6:27238478:27238671:-	GATACGCACCTAAAATGGCATCCTCTCTTTCCAATCACGGGACATGCGCCAAAGCATCAAATCATTCACAATTAAACTTTCAAGATTTCGCTGCGCTGCGCCGAAAGTGACTTCGTCGCTTTGTGATTAATAAAGCAAACAGTTATGCAGCATGTGCCGCCGAAAGTGACGGTGTCGCTTTGCAATTATTGTCA	((((......((((.(((((((.((.(((((......(((.((((((((....................................(((((.(((...))).)))))((((((.....(((((((.....)))))))....)))))))).)))))).)))..))))).)).))))))).)))).......)))).	-45.2	A2-m0066-5p	-	13	13	-	TAAAATGGCATCCTCTCTTTC	-
	novel_mir_91	Chr6:28330745:28330822:-	ACTATAGCTCTGCATGGGATTGGGATGTACCGGGACATTTAAGAATGATGGTTCGTTGGATTCCGCAAGTCTATCAGG	.((((((((.(((..((((((..((((.((((...((((....)))).)))).)))).))))))))))).)))).)).	-18.4	-	A2-m0067-3p	7	-	7	-	ATGGTTCGTTGGATTCCGCAA
	novel_mir_93	Chr7:5730180:5730396:+	AAACTCCCGCTGCATCTCATGTTCTATCCTGATCCTCAATCCAACACCACTTTACTAAGCAAAAGTTATATGCGCGAAAATTGTTGTGTTTACGATACACAAAATTGCAAAACAAAGTGCTGCTGAATTCTATAAGAATGGGAAGCATTCAGAAAGCAAGAGTTTTTCCAAGAGAGGCAGTACTGCAGTAGAACAAGAGCATAGCAGCTTGGCTCCA	.....((.((((((((((.(((((((..(((.................(((((........))))).......((((...((((.(((((...)))))))))..)))).......(((((((((...((((.......(((((((.((((.........))))))))))))))).))))))))).)))))))))).))).)).)))))..)).....	-50.6	-	A2-m0068-3p	41	-	40	-	AGTAGAACAAGAGCATAGCAG
	novel_mir_94	Chr7:6434033:6434328:+	TATGTAGCCAATGTAAGAGGTCGGTCATGATTCTTGAAGCCCTGCGGTACTTCCTATTGAAAGAGATGGAGGCGGTATGTATAGCTGATTGATCCGTTTGTTGCCATAGGAGCAAACTTCTCTTTATCCCCCTTGACTCTTCAAACACCTTTGATAAGGTCTTTGCTAGAAGACTAGAGCACTAGACAAAAAAACAATGGGATTCACATGTTCTTGGTAGTTTGGCCAATTTGGTGTCTTCTCGGCATAGCATGGGCGACCTTCGGCATTGAAAATACTTTCTTGGTGCTTGCAGC	..((((((((((((..(((((((.(((((......((((((....))..))))...(((((.(((.(.((((.((.(((...((..(.(((.(((...((....))..))).))).)..))...))).)))))).)))))))))..(((((....)))))((.(((((((((((((((...((((((..((.((((.((.......)))))).))....))))))....))))..))))))).)))).))))))).)))))))..)))))).....(((.....))))).))))..	-73.9	A2-m0069-5p	-	51	51	-	ATGTAAGAGGTCGGTCATGAT	-
	novel_mir_146	Chr7:9043279:9043424:+	AGTGCCGCCATGGATGTGAGCAGGCACATGAGTCAGCGATCTGGAGCGAATGGAGCCTTCCTGGGCAACACACCTGCACCGTAGTTGCAGTCTTCCTGAGCTCATGATCTGCTTGACATCGACAGGCAATGGCAGCGCGGGCGCTC	..(((((((.(.((((((((((((..((((((((((.((.(((.(((..((((.((((....))))............)))).))).)))...)))))).)))))).))))))).))))).)..)))...))))(((....)))..	-53.6	A2-m0070-5p	-	6	5	-	TGGATGTGAGCAGGCACATGA	-
	novel_mir_147	Chr7:28101066:28101292:+	ACAGAGGGAGTAAGGGGCAGTTGTAGTTTTCCGCGTTCAACATTTGACCATCCGTTTTATTTGAAATTTTCTTATGATTTGTATTTTTATTGTTATTAGGTGATAAAACATGAATAATACTTTATACGTGACTTTTTAAAAAAAATTAAATAAGATGGACGGTTAAACATTGGATACGGAATACCACAACTGCACTTATAATTGTACGGAGGGAGTATATAGCTGTA	((((.....(((((..((((((((.((.(((((.((((((..(((((((.((((((((((((((.(((.(((.(((((..(((....))).))))).))).)))....((((.((((....)))).))))...............)))))))))))))).)))))))..)))))).))))).)).)))))))).)))))...(((((.......)))))...)))).	-62.6	A2-m0071-5p	-	6	6	-	TAAGGGGCAGTTGTAGTTTTC	-
	novel_mir_68	Chr7:538371:538488:-	GTGATATTCCCCTGTGACATTCTCGGTGACATTGAGTCACTGACATGTGGGTCCAGACACATGTGGGTCCCACATGTCAGTGACTCAATGTCACTGAGAATGTCACGGGGGAATGTCA	.((((((((((((((((((((((((((((((((((((((((((((((((((((((........)))).))))))))))))))))))))))))))))))))))))))))))))))))))	-102.7	-	A2-m0072-3p	17	-	16	-	ATGTCACTGAGAATGTCACGG
	novel_mir_98	Chr7:6418469:6418621:-	ACCAACTTGCACGCATTTAGAGATCCTTCATTGGACATGTACGTGAGCATGAGCACGAGCACGAGATTCATCATGTGGCAGAGCACGAGTAAGCTACCCCAATGGATGTAGTCGCAAGCTACCCAATCTAGGACTGGCAGCATGTAAACCTGG	.(((..(((((.((..((((...((((..(((((.(((((......)))))......(((....((((((((...(((...(((........)))...)))...)))).))))....)))..)))))..))))))))..)).)))))...)))	-37	-	A2-m0073-3p	64	-	63	-	CCAATCTAGGACTGGCAGCAT
	novel_mir_99	Chr7:6703796:6704079:-	GTGCAAACGGTCCGACCGGCGGCGACAGAACTACGTCGAGATTTCCATCGATTCGAGGGTAACTTTTATTTCCGCTAAAAGTTTTTGGGTTTTTGGTTTTCCTAACTATTCACTCCTCTCTGGTAGGCTTGGTTACTTGTATTCGATCCTACAGAAACTTACCTTAAAAAATGAATCTGAAAAAAAAACTCAAGAGTCCACACTAGTGCTATATATACTTTCATGCATTCGGCAAATAGCCTTGTCTTCTCGTACTCTGTTTTGCTTGTCTGGACTAGCTTAGT	........((((((((.(((((.((((((..((((..(((((..((.(((...))).)).((((((((.......))))))))..(((((((((((((((.......(((((.........((((((.(((.....(((....))).....)))...))))))........)))))........))))).))))))))))....(((((...............))))).(((.....)))..)))))..)))).))))))))))).))).)))))........	-62.4	-	A2-m0074-3p	14	-	14	-	ACTCTGTTTTGCTTGTCTGGA
	novel_mir_107	Chr8:18588098:18588212:+	CAACTTGACAGCGATCAACCCAGTTCTCTGGCACACTGCCCCCGGTCGTTGGATGCTGGCCTCGTCAATGACCTGATTAATATACAGTAGAGCTGGGACGTTCGATATGCTTCTT	...........(((.(..(((((((((((((((...)))....((((((((.(((.......)))))))))))...........))).)))))))))..).)))...........	-32	-	A2-m0075-3p	7	-	7	-	CAGTAGAGCTGGGACGTTCGA
	novel_mir_108	Chr8:18672868:18672961:+	TGGATCGGCCACACAGAGTCGCGCAGTGGTACACTTTGGCCGGTCGAATGCCCTCGCCATTTTCTCTTGTGGTTGACTTTTTGTGTTCGATCCT	.(((((((.((((.((((((((((((.((.......((((.(((.....)))...))))....)).)))))..))))))).)))).))))))).	-33.3	A2-m0076-5p	-	49	48	-	ACACAGAGTCGCGCAGTGGTA	-
	novel_mir_148	Chr8:2750338:2750603:-	TGGTCAAGAAGAAAATGCGTGTGATGCATTTTGCCTTTATTGTCGAGGAGATGCACGAGATTTGCTAAGATGTGTGGAGGCTTAGAAGGCATCAGGAAGTTCAGCCAAGTGTCATAGCCAATATCATGTAGTGCCTCGGCGACATTGAGTACCAGAGCAGCAAACAGGAGAGCGTGGTGTAAGAGAATGCTATCCAGTTGCATGATAACTTGATAAGCTCTAGTATCTCAATGCTAAGTAGGGGAACAAGGTGTGTAGCTTGATTG	.(((((((...............(((((((((((((((((((((((((...((((.((.(((.((((.(((...(((.(((((.((.....))...)))))...)))...))).)))).))).)).))))...)))))))).((((((((((.(((((.((((.(.(((.(((((...........))))).))).)))))...............))))).))).)))))))....)))))))..))))))))))..))))))).	-73.4	-	A2-m0077-3p	5	-	5	-	AAGTAGGGGAACAAGGTGTGT
	novel_mir_148	Chr8:2756315:2756580:-	TGGTCAAGAAGAAAATGCGTGTGATGCATTTTGCCTTTATTGTCGAGGAGATGCACGAGATTTGCTAAGATGTGTGGAGGCTTAGAAGGCATCAGGAAGTTCAGCCAAGTGTCATAGCCAATATCATGTAGTGCCTCGGCGACATTGAGTACCAGAGCAGCAAACAGGAGAGCGTGGTGTAAGAGAATGCTATCCAGTTGCATGATAACTTGATAAGCTCTAGTATCTCAATGCTAAGTAGGGGAACAAGGTGTGTAGCTTGATTG	.(((((((...............(((((((((((((((((((((((((...((((.((.(((.((((.(((...(((.(((((.((.....))...)))))...)))...))).)))).))).)).))))...)))))))).((((((((((.(((((.((((.(.(((.(((((...........))))).))).)))))...............))))).))).)))))))....)))))))..))))))))))..))))))).	-73.4	-	A2-m0078-3p	5	-	5	-	AAGTAGGGGAACAAGGTGTGT
	novel_mir_149	Chr8:25644715:25645000:-	GTCGGCTCGCGCCGGCGGTTGCCGCCGCCGCTGCCGCTGCACTGCTCGGCGTCGGAGTCGTCCTCCTCGTCCTCCTCCTCGACGACGGCGTGGTCGGGGGCGAGGAGAGGGGGCAGGTAGGTGGTGGCCAGCGAGCTGCAGGACGCGCGCCGCCGCGACCACGCGGCGAGGACGCGGCGGCGCTTGTTGAACGGGTTCTCCGGCTTGGCGATCTCCTTCGCCGCCGCCTTCGCCGCCGCCTCGGCCAGGCTCGTGAACGACTTGGACTTGCCGGCGTAGAAGTTGG	..((((..(((.((((((...)))))).))).)))).....((((((((((((.((((((((((((((.(((((.((((((((.((...)).)))))))).))))))))))))..(((((((((((((..(.(((((....((((.(((((((((((.((.((...)).)).))))))))))).)))).....))))).)((((..(((((......))))))))).....))))))))))..)))..........))))))).)))..))))).)))).......	-160.5	-	A2-m0079-3p	8	-	7	-	AACGACTTGGACTTGCCGGCG
	novel_mir_115	Chr9:6762900:6763017:+	TTTTCAATCTAAAGACTGATAAGTAGATCGAGCAGATAGATGTAGTATTAGCTTCCACGTGTCACCTCCTCTACTCTTGAACTATATATGAGATCGTTGGCGGTAACTAGATAGAGCT	........((((.((((.(((.((((.(((((.((.((((.(..((....((......))...))..).))))))))))).)))).))).)).)).))))..................	-20.6	A2-m0080-5p	-	12	12	-	AAAGACTGATAAGTAGATCGA	-
	novel_mir_116	Chr9:9021971:9022217:+	CCGCCAGAGTTGTAGCATGTAGGGAAGGTTAAATCCATTTGGGTATGATGAAGTGTTATTCGAAAGGCTAGACGATTGGCAGCACATCTTGCTGCTAATTTGCCATTTTTTAGATAAAAAAGCCAAGCCTTCTAAAAGGAATGTTTGATGTACCTAGAGAAGTCACTACCAAACAGAAGAATTTGACTGTAATAACAGCTGCAGATTGATCCTTAAAATTCTGTAAAAGTGCTCAACGAAGTGGTGA	.(((((..((((.(((((.((.((((..(((((((.((((((((((((((((......)))....(((.....(((((((((((.....))))))))))).))).((((((((.((...((((....((((....))))...))))....)).)))))))))))).))))...((((....)))).((((....))))...))))).)))..))))..)))).))...)))))))))....))))).	-62.1	A2-m0081-5p	-	42	41	-	TGTAGCATGTAGGGAAGGTTA	-
	novel_mir_119	Chr9:9324265:9324429:+	TTGGCTATTACAGAGAAATCCAAATCGCGTGCTTTTCTAGTGAAAGACAGGTATTATTCACATCATATTCTTTTTCGTGTGTTCATACTCGTCAGTGTTTAACATGTTTTTCCTTTTTTTTTACCGTGCTGATATGAGGTTTGCATTTTATTCTGTAATTTCTCT	..((..(((((((((((((.((((((.((((........((((((((.(((........................(((((....(((((....)))))...))))).....)))..))))))))........)))).)))))).)))))..))))))))..))..	-29.2	A2-m0082-5p	-	6	6	-	CAGAGAAATCCAAATCGCGTG	-
	novel_mir_150	Chr9:15696993:15697099:+	CCTCGGTGGCTTGGCTGATACCCATTGTTGGATGTTGGAGTTGCTTTTCGATTTGGCGACTTTCGTGGCTTTAGGGTCGCTGCGGTTGTGAAGTCGGTGCCACTGGG	.(((((((((....((((((.(((....))).)))))).........(((((((.((((((...((((((....))))))...)))))).))))))).)))))))))	-40.5	-	A2-m0083-3p	6	-	6	-	TCGCTGCGGTTGTGAAGTCGG
	novel_mir_151	Chr9:8887629:8887837:-	GTGGAACATGAACAGCAAGACTCTGTTGCATAAGTGCATGTTTGTTGAACTGGAACTGTATACGAAGGCATTCGTATGAAATTTGATTGAGTTGTGCTCCTCCAAAACAGTTCAAACAATATTCTGCTAGAGATTAACATCCAGGGAACGTTGAATTCATATATTATTAGTCTTTCCATGCAAATCAGAGACTCTGGTGTTCAGTCCAG	.((((.(.((((((.((((.(((((((((((....(((.(..(((((.....((((((((((((((....)))))))....((((...((((...))))...)))))))))))...)))))..)))).(((((((((........(((.......)))........)))))))))..))))))..))))).)).)).))))))))))).	-53	A2-m0084-5p	-	9	8	-	AACAGCAAGACTCTGTTGCAT	-
	novel_mir_75	Chr9:18868646:18868929:-	CGCGGTCGCTGCTCGCCGTCTCCGACTACTTCCACCGCCTCCGCACCCTCAGCTCCCTCTGGGTCACCCGCCCCAGGCACCCGCCTCACGACCACCAGCCGCCGCCGCACTCCGCCGCCCCCCACACCTGAGATCACCGCCGCCGGCAACGCATGCAAACACCGTAGCTCTTAGCTAGCAGCTTAGAGATATCGAGAGATCAGAAATTAAGCGATCGATCGAGAGAGGACGACGACTGTGAAACCCCCCATGGAATGGATGGATGGATGGATGGATGAACCGAT	..((((.....((..(((((((((.(((.(((((.........(((..((..(((((((.((((.....)))).((((....))))...........((((.((.((..(((.................))).....)).)).))))......(((.......))).((((.((((...)))).))))...((((..((((...........))))..))))))).))).)..))..)))..........)))))))).))))..)))))..))....))))..	-68.1	-	A2-m0085-3p	15	-	15	-	AATGGATGGATGGATGGATGG

## Sheet: A3
	miRNA ID	Location	miRNA precursor	Structure	MFE	Id(5p)	Id(3p)	count	count(5p)	count(3p)	mature miRNA (5p)	mature miRNA (3p)
	novel_mir_152	Chr10:10797544:10797664:+	TCATGGTACAATCCTCTTCCTGCTGAGCCCCCTTTCTCCTCGGTCCACAGAGAAAAAATGGAGGACTGGTGCCGACAGTTCATCACGGAAGAAAGAACTCACAGAGCCGGGATCGCTAACT	...((((...(((((....(((.((((....((((((((.((((((.((.........))..))))))(((..((....))..))))).))))))..)))))))....))))).))))...	-28.2	-	A3-m0001-3p	19	-	18	-	AGAAAGAACTCACAGAGCCGGG
	novel_mir_153	Chr10:14848457:14848534:+	GAGCCGCCGGCATCTGCTCTTCCCCGTCGCCGCCGCCGAGAAATCAAGCGGACGAGGAGGAGCAGCCCCGGCTGGCCT	..((((((((...((((((((((.(((..((((....((....))..))))))).))))))))))..))))).)))..	-42	-	A3-m0002-3p	6	-	6	-	GCGGACGAGGAGGAGCAGCCC
	novel_mir_152	Chr10:10897223:10897343:-	TCATGGTACAATCCTCTTCCTGCTGAGCCCCCTTTCTCCTCGGTCCACAGAGAAAAAATGGAGGACTGGTGCCGACAGTTCATCACGGAAGAAAGAACTCACAGAGCCGGGATCGCTAACT	...((((...(((((....(((.((((....((((((((.((((((.((.........))..))))))(((..((....))..))))).))))))..)))))))....))))).))))...	-28.2	-	A3-m0003-3p	19	-	18	-	AGAAAGAACTCACAGAGCCGGG
	novel_mir_2	Chr10:14220313:14220408:-	AGACATCTGGATATCACTTCTGATGTATTCCTTGGTGTAAGCTACTGAGATTTGGTATGGTAGTTTCTGTGGCACTTGCACAAGGACCAGTTTTAT	......((((((((((....))))))..((((((.((((((((((.((((((.........)))))).)))))..)))))))))))))))......	-28.1	-	A3-m0004-3p	29	-	29	-	TCTGTGGCACTTGCACAAGGA
	novel_mir_152	Chr10:20452225:20452345:-	TCATGGTACAATCCTCTTCCTGCTGAGCCCCCTTTCTCCTCGGTCCACAGAGAAAAAATGGAGGACTGGTGCCGACAGTTCATCACGGAAGAAAGAACTCACAGAGCCGGGATCGCTAACT	...((((...(((((....(((.((((....((((((((.((((((.((.........))..))))))(((..((....))..))))).))))))..)))))))....))))).))))...	-28.2	-	A3-m0005-3p	19	-	18	-	AGAAAGAACTCACAGAGCCGGG
	novel_mir_154	Chr11:15497332:15497597:+	GGCAGCCGGCGACGAGCCCCTCCACGACGGAGCTGAGCCCGGAGTGGTTGACGAAGCAGCCCACGCTGCGGTGGCGCAGGATGTGCTGCTGCTGCACCCACCCGGTGTGCAGGATCCCTCTCCCCTTCACCCTCTCCTCCAACCCCGGCGGCGTGAGCTTCCTCAGCTCCGCCTCGGCGTCCGTGCCCTTGGGGAAGTTGAGCACTGCGAGGAACGGCAGGGCGGTGGCCTCTAGTCCGAGGAGGAGCTCCGTCGCGGCGGCGTGC	.((((((((((((((((.(((((.((((((((..(((.((((.((((.((....((((((.((..(((((....)))))..)).))))))....)).)))))))).(((.(((..........))).))).)))..)))).((.((((.((((.(((((.....))))))))))))).))((((..(((((.((..........)).))))).))))..((((....))))...)).)).))))).))).))))))..)))).)))	-126.9	-	A3-m0006-3p	7	-	7	-	TCCGAGGAGGAGCTCCGTCGC
	novel_mir_9	Chr11:12147701:12147994:-	GTTGGTCCAATTAATCGTCGATCAGGCACAATTAATTGTCCGATCAGAGCACCTATCGATCACCTTTTGAACAATTCTTAGGGTTTAGCACATGTGAATATGTGCTACTACTGCTGGTTGCTTTATACTAGGGCAAGTGACCATCTTGCCATCAATTATTAGTGCTGTGATTGCTTTATACTATGCACTATATAGAATATAGGTTCTAGTATTCATAGTACTGATCAGGTCGACTAATCGAGGCTGATCGACGATTAATTTTCCTGGTCGGTCCCTTGGTGATCAGGATCAATC	........(((((((((((((((((.(.(.((((.(((.((((((.((.......))))))(((((..(((...)))..))))).(((((((((....)))))))))......(((((........)))))((((((.......)))))).......(((((((((((((.((((..(..(((((..((....))..)))))..)..)))).)))))))))))))..)).))).)))).).).))))))))))))))))).(((((((((.(.....).)))))))))......	-102.6	A3-m0007-5p	-	20	20	-	TTAATCGTCGATCAGGCACAA	-
	novel_mir_10	Chr11:16493226:16493515:-	ACCGGCACCGATTTGTGTGTCTGTAGCGGTGTGTGACAATTACATCATGGATGAGCTCGCTTGTTCCCGTGAAATCGTCACCGAGTTCGCGCAGCATGTACGCGGACTCTGCCCAGAAATCTACTACCAACGAGAACTCGTTGCAAGTTCGTTTTCTGCGCACGCAAGTCATTTACTAATTGTTATATTTTGGGACGAAAGGTATTTTGGGACGGAGGGAGTAGTAGATATACGATTTTTATTAAAACTGTGTTCAGTACAGACTGACAGGTACACACATTCACTAATTA	.........(((.(((((((((((..((((.((((.........((((((..((((......))))))))))..(((((.(((((((((((.........)))))))))(((.((((((...(((..((((((....))))))..)))....)))))).))).((((............))))........)))))))...........(((((.((....(((((((.........)))))))...)).)))))..)))).))))))))))))))).))).........	-79.7	-	A3-m0008-3p	6	-	6	-	CAGACTGACAGGTACACACAT
	novel_mir_155	Chr11:19402806:19402950:-	TCTATCTATAAGTGGAATAGAATAACCCGGTTGAAGTGTAATGATCATATATTTTGTAATGCATTGTATGTCATTGATTCTTTCCCAATAAATGAAAACTTTTTCTGTAAATACTGCGTATTTGATTCCATTATCATATGATAAT	..(((((((.((((((((.(((((.(.((((.((((.(((((((.((((((...(((...))).))))))))))).)).))))..........((((....)))).......)))).)))))).))))))))...))).))))..	-23.2	A3-m0009-5p	-	6	6	-	AGTGGAATAGAATAACCCGGT	-
	novel_mir_12	Chr11:24920007:24920082:-	AAGCATGATCAATGGGATTGAGGGGTACCAGGAAAGAACACCTTCCTAGATTTCTCAGAACGGTTGTTGTTCTGCT	.((((.(((((((.(..(((((((((.(.(((((........))))).))))))))))..).))))..))).))))	-22.2	-	A3-m0010-3p	10	-	10	-	CTAGATTTCTCAGAACGGTTG
	novel_mir_123	Chr11:26348042:26348381:-	TGTTCAGTGTTTTCTTATTCACTTTTTGTTATGATGGGCTAGAAAAGGGCTTGGCAATCCCAATTACTGAATTAACCATGTACACCATGCGAAAATGGGAAGAACACCGGACATAGGATTTCGATCAATAACCTTCATTGACACAATGAACAGGTTATCGTCGCTACCAATGAGACAAACAGTAGCATTATCTCTCTTTCACAGTTCTTTCTTCAGAACACAAACCCTTGCTGCGGCAAGAGAACTGAAGATCACAACAGAGTATCATATGAGAGAAAGACCACCTCCGTTATCGTTTCGTGTTTGCTAATGACAAGAAGAATGTGGCGAGCACAAAATC	......((((((..((((...(((((((((((.((((........((...((((.....))))...)).......))))..((((...((((.((((((..(((..((.......))..)))(((..(((((((((((((...))))))..))))))).)))(((((..............)))))....(((.((((((((((((((((((.(((..............))).))..)))))))))..(((.((......)))))...))))))).))).....)))))).))))...))))......)))))))))))...)))).))))))......	-73.5	-	A3-m0011-3p	10	-	9	-	ATGACAAGAAGAATGTGGCGA
	novel_mir_13	Chr12:2441355:2441614:+	GCCCGCGGCGGTGGGGCGGCGGTGGTGGCGGCGAAGGTGATGGACAGGAAGGAGCTGGCCGGGAGGAACAAGGAAGGGCGGGCGAGAACCGAGAGGGAGATCCTCGAGGCCGTCGACCACCCCTTCCTCCCGCGCCTCTACGGCGTGGCCGAGGGGGATCGCTGGTCCTGCCTCCTCACCGAGTTCTGCCCCGGCGGCGACCTCCACGTCCTCCGCCAGCGGCAGCCGCACCGCCGCTTCACCGAGTCCGCCGTCAGGTA	(((.((((((((((((((((((((.(((((.((..((((..((((.(((.(..((((.(((((.(((((.((((((((..(((((...((..((((.....))))..))...))).))..)))))))).(((((((.....)))))))..((((((((((...)))))).))))........)))))..)))))))))..).)))..))))..))))..)).).)))))))))))))))))))......)))))..))).	-149.5	A3-m0012-5p	-	6	6	-	GTGGGGCGGCGGTGGTGGCGG	-
	novel_mir_124	Chr12:9434249:9434520:+	CGAGCACGCGGTCGCGAGGAATCCTGCCGGGCTTCTTTTCCTCTCAAGTCAACGACGCGCGTCACACCACACGTCTAGGTAGACGTTTGTCCATGAACGATCGCGAGGCCCCGCCGCGACCGCCCGCGGCAGCGATCATCGGACGGCGCCGAGGGGCACACGGAAGGATCGGATGGTCCATGCGCGCGCTGGCAGCCTACGCAAGTAACGCAACCCGTGCGACTGCCGGCCGCGTCGCCGCGAGGAGATCAGGAGGCAGGAGCGCGTGCGTT	...(((((((.((.....)).(((((((...(((..(((((((.(...(((..((((.(((((..(((.........))).))))).))))..)))....(((.(..(((((.(.(((.((((((((....)))......)).)))))).).))))).).)))..(((((....)))))..((((((((((((((..(((....))).((((.....)))).))))))).)))).))).).)))))))..))).))))))).)))))))...	-112.5	-	A3-m0013-3p	10	-	10	-	GAGGAGATCAGGAGGCAGGAG
	novel_mir_18	Chr12:17949899:17949979:+	GTCGTCGTCGAACCATCGCGTCGCGTCCCCGTGTCTGTCGAGCGAGATGGATGGATGGATGGATGGATGGGACCGGACGAG	.(((((......(((((.((((.(((((...((((((((......))))))))...)))))))))))))).....))))).	-34.8	-	A3-m0014-3p	12	-	12	-	ATGGATGGATGGATGGATGGG
	novel_mir_20	Chr12:18190759:18190899:+	TACATGTGTAGATCTAATGATGCGTTCATGCTAGTTTTCATCTGTAATGTCATGATTTATTTATGGAATAGATTAAATCATTATATGTCTATAATCTCAACACTTTGTTCCAGCTAGCAGAACTATCGCGTTCCACATGAA	..((((((..((.(...(((((.((((.((((((((......(((((((...((((((((((...))))))))))...))))))).............((((...))))..))))))))))))))))).).))))))))..	-31.8	-	A3-m0015-3p	18	-	18	-	CAGCTAGCAGAACTATCGCGT
	novel_mir_21	Chr12:18292723:18292803:+	TGATCTGGCACAAGGCAACCTGTGGAGGGCACAATATGTATTTCCAAAACATGTATTCTAGAGTTTGTCATGGCCAGCAAC	....(((((.((.(((((.((.(((((.(((.....((......)).....))).))))).)).))))).)))))))....	-23.9	A3-m0016-5p	-	11	11	-	CAAGGCAACCTGTGGAGGGCA	-
	novel_mir_156	Chr12:25219058:25219145:+	ATTCTTCTTTTAGATGAAGCTAAAACTGTTTGTCAGGGTTTAGATCACCTCTGAAAGTTAGAACTCTGCCAAACAGGGTGAAAGAGAG	.((((.((((((.............(((((((.((((((((.(((...........))).)))))))).)))))))..))))))))))	-21.5	-	A3-m0017-3p	16	-	15	-	AGTTAGAACTCTGCCAAACAGGG
	novel_mir_127	Chr12:14944199:14944386:-	CTGTGGTAATGCTAGATCGGCTGGTCAAACAGTGTGCAGGTGACAAGACTGTGCTACGACTGAGGACCATGCGGCAGTGTGGGGAATATCAATTGGGACAGAAGATACAATGAAGATGAGTAAAATTGACGTTTTGAAATTCTTCTCCTTCCAGAGGACTGATGGCTGGATTGGATTGGAAACTAAAT	..((..((((.((((.((((((((((...((((((((((((......))).))).)).))))....((((((....))))))..........((((((.((((((.....(.((((((...........)))))).)...))))))..))))))..))))...)))))).))))))))...)).....	-41.5	-	A3-m0018-3p	9	-	9	-	ACTGATGGCTGGATTGGATTG
	novel_mir_31	Chr12:18102039:18102221:-	CAGCCTTGTGCCTAGGCTTCCATGTGGTTAGGGGTCGATAGTAGAGCTTCTGCTCACCATCCATGCCTGAAGAAGGGAACAGTGGACCTAGTCCAACAACCAATGTGGTTAATTTCCCCCACAAAATCTGTAAAAAGTGAAACTTTGTTGCAACTTTCATGGAAGATAGGCTCTCTTTGGCTT	.((((..(.(((((..((((((((.(((((((.((.(((.((.((((....)))))).))).)).)))))....(((((...(((((...)))))..(((((...)))))...)))))..........((((((((((...))))).))))).))..)))))))).))))).).....)))).	-58.2	-	A3-m0019-3p	17	-	17	-	ACTTTCATGGAAGATAGGCTC
	novel_mir_42	Chr12:24620003:24620266:-	GCCTTCGCTGCGACGGCGATGAATAAGCGGCTCAGGCCAGAGCCGCCGCGAATCCGTTGAGGAAGCTAGCACCACCAGGGACACACAATTTTTAGTCAGATGTCTAGGGGGCGCTTGGTTTGGATCTTCTCCTTTTCCCCTTCTTTTTTTCTCCCTTTTTTTGACATAAGTTTCCAAAATATTTATTAGGTTCTTTGAGCCATTGCCATTGGTTGGCATTTGGCAAATGTTGTTGGATTGGATTGGTTTGGTTTGTGAGAAGGA	..(.((((((...)))))).).....(((((((......)))))))......(((.((..(.(((((((.((((((((...((.(((((.(((.((((((((((.((((((.....((...(((...........)))....))......)))))).........((((((.........))))))..(((((...)))))...(((...))).))))))))))))).)))))))..))))..))))))))))).)..)).)))	-71.8	-	A3-m0020-3p	12	-	11	-	TGGATTGGATTGGTTTGGTTT
	novel_mir_157	Chr1:2349250:2349434:-	TAACACCATTTTGGGGCCTGTGAATCTTTGTCACAATAAGTTCTCACTCCCAATATGAGATCCTTCGCTCCGCTGATGATGTAGGCCAGAGGAGAGTGATCCTTTTTCTTTGATTGCAGCAGTCGAACCGCTGTCTCACAGTCAGACTCGCATGAACAAGTTGATATGGCCCTGAATCAACAAAG	.........((((((((((((.(((..((((((......(.(((((.........))))).).((((((..((((.((((..(((..((((((......))))))..)))..)))))))))).))))..((.((((.......))))..)).)).))))))).))).))))))))).........	-42.1	-	A3-m0021-3p	27	-	26	-	AACAAGTTGATATGGCCCTGA
	novel_mir_152	Chr2:813282:813400:+	TCATGGTACAATCCTCTTCCTGCTGAGCCCCCTTTCTCCTCGGTCCACAGAAAAAATGGAGGACTGGTGCCGACAGTTCATCACGGAAGAAAGAACTCACAGAGCCGGGATCGCTAACT	...((((...(((((....(((.((((....((((((((.((((((.((.......))..))))))(((..((....))..))))).))))))..)))))))....))))).))))...	-28.6	-	A3-m0022-3p	19	-	18	-	AGAAAGAACTCACAGAGCCGGG
	novel_mir_42	Chr2:5209900:5210119:+	CATCAAATGGGTTCAGGAGTCGTTTCCGACAGGCGGGGATTGCTCCGGGTTGGTGGTGATCTACGAGCAGTGCGTGCGTGCCTTCTGGCACGACGACCGCTACAAGAACGATCTCCGCTACCTCAAAGTGTGGCTGGAATATGTGAGTTTCATGAATTCAGGATTGGTTCTGAGGTGGATTGGTTGGATTGGATTGGATTGGTTTGGTTTCCTTTTGACA	.(((((((.((((((...(((...((((((...(((((....))))).(((.((((....)))).)))....(((.((((((....))))))))).(((((...(((((((((((((((((((...)).))))).))).....(((((((...))))))).)))).)))))..)))))....))))))...))))))))).)))))))............	-75.5	-	A3-m0023-3p	14	-	13	-	TGGATTGGATTGGTTTGGTTT
	novel_mir_44	Chr2:13849040:13849383:+	GCCGCCTCTCCCGCCACCGGCGCCGCTTCCCTTCCCATCTCCCTCCCTTCTCGCCGGCTCGGCGCGGCAACGGCGGGGTTCGGCGGAGACGGCGCCGTCCCAACGGCGGCGACGACGGCGTTCGCGGTGGCCGCGCTCCCTCTTCCCCTCTCCTACCCGTCTCGCCGGCTTGGCGCAGCGACGGCGGGGTGCGGCGGAGACGGCGGTGACGGCCGTCCCTCCCCCTCTCTCTCTCCCCGTCGGCCTCGACGGCGACAGCGCCCTCCCAACGGCTGTGATGGCGTCGGCTTCATCCATGGGCGGATCCGGCGGCGGCGGCGGCGGTGGTGGTGGTGTCGGTGGCC	((((((....(((((((((.(((((((.((((.((.(((((((.....((((((((((((.((.((....)))).))).))))).))))((((((((((((((.(.((((((.(((((.((.(((((...)))))...................))))))))))))).))))).(((((...((.(((((((((.((.((((((.......)))))))).))...........((.((((((....)))))).))..))))))).))....)))))))))))))))...........))).))))..)).)).)).))))))).)))))))))....)))))).	-175.4	A3-m0024-5p	-	10	9	-	CCGCCACCGGCGCCGCTTCCC	-
	novel_mir_158	Chr3:15610596:15610731:+	CGGAGAGCTTCGCTTCCTTCTGCAATCCCGGTCCCGCTAGCCCTAAGCCTCCGGTGGCGTCCGACCCCCACCGCGCCGCCCCATGAGGCGGCAGCTTGAGTTTGCCGCTGACAGGCTGGATGACGATGACGACTTC	(((.((.....((........))..)))))(((.((.((.((...(((((.((((((((...(((...((..((((((((......)))))).)).)).)))))))))))..))))))).)).))..)))......	-42.9	-	A3-m0025-3p	30	-	29	-	CGCTGACAGGCTGGATGACGA
	novel_mir_159	Chr3:29333218:29333471:+	AAGCTGCGACAAACTTTCCTGGTCGCGTCGGGGAGGAGCGGCGTCTATATTCTGAGAGCGTAAGGCTGCCGGTGAAGAGCCAATCCCAGTCTCCTGTCCTCTTCTCACTGCTCCACTTCCCTCCCGAGAGCTTCTTCCCCTCCCGGCTACCCTCAGTAGTCCTTCTCGATCTGGCCTGAAGGTCACCGGTGGCAATCCCCAGCCGCCAGATGCCACTCCTCCCCGACGCGACCAGGAAAGTTTGTCGCAGCTTT	((((((((((((((((((((((((((((((((((((((.(((((((.....(((((.......((..(((((.((((((.......(((....)))..)))))).....(((((...........).))))...........)))))..)))))))..(((......))).(((((....)))))..((((((........))))))))))))).)))))))))))))))))))))))))))))))))))))).	-134.6	A3-m0026-5p	-	78	76	-	AAACTTTCCTGGTCGCGTCGG	-
	novel_mir_50	Chr3:32511910:32512120:+	ACCACATGCAAGTGCTATCATTTCACCTACATCGTTTATTAGCTACCAAAATAATTTTTTGAAAGAACTTTTATATATGTGTTCATAGCAATTTAAAAGCTAATGATGAAAAATAAATTACAGCAAAAAAATCAAAATTAACTCTTTAAGAAATATCGGAGCTGGTGAGAAGCAAAGAAAACAAATGTAGAGAGAATGGTCGTGCGATGGA	.(((..((((.(.(((((..((((..((((((..((((((((((.((...(((.(((((((((.((((............)))).((((.........)))).((((.......................))))..........)))))))))))).))))))))))))...............)))))).)))))))))).)))).))).	-32.5	-	A3-m0027-3p	5	-	5	-	ACAAATGTAGAGAGAATGGTC
	novel_mir_18	Chr3:36271499:36271667:+	AGGAGAGGTTATGGATGGATGGATGGATGGGATTGGATTCCCCTTCCCCCGCCCCCAACTAAACAAACAACTAGTATATGCTAAGGGCGGCGCAACGCTAATACTCCTCCCTAGTCCTCCTAGGCTACTCCTCTCCTCCCTTCCATCCATTCACCCTTCGCTTCATCCG	.((((((((...((.((((((((((((.((((..(((.......))).((((((.................((((....)))).))))))...................(((((.....)))))............)))).)))))))))))).))...))))).))).	-55.8	A3-m0028-5p	-	12	12	-	ATGGATGGATGGATGGATGGG	-
	novel_mir_18	Chr3:3825506:3825618:-	GGATGGGTGGATGGATGGATGGATGGATGGGATGGAGCTGATCAATCGTGCGGTCACCTCCGATGGGGACGTCGCACCCAACCATACATCTCACGCCCAGTCCAGCCCAGCCG	((.(((((((((((.((((((..(((.((((.(((((.(((((........))))).)))(((((....))))))))))).)))..)))).))...))).)))).)))).)).	-47.5	A3-m0029-5p	-	12	12	-	ATGGATGGATGGATGGATGGG	-
	novel_mir_152	Chr4:9144600:9144720:+	TCATGGTACAATCCTCTTCCTGCTGAGCCCCCTTTCTCCTCGGTCCACAGAGAAAAAATGGAGGACTGGTGCCGACAGTTCATCACGGAAGAAAGAACTCACAGAGCCGGGATCGCTAACT	...((((...(((((....(((.((((....((((((((.((((((.((.........))..))))))(((..((....))..))))).))))))..)))))))....))))).))))...	-28.2	-	A3-m0030-3p	19	-	18	-	AGAAAGAACTCACAGAGCCGGG
	novel_mir_138	Chr4:17419253:17419469:+	GCTTTCAAGTATATATTTGATCAGGGATTCAACATGCCTAAGTGTCATTATGCATAATGCATGACATATAGTCAAAGAACAAGAAAAAGAATGGGTAGTACCAAAATGCTAGGTAAGTGTGATGCATCAGAGACAGCCTTGCGTGGCTGCTGTACAGGATTGAATCATTTTGTGGTTTGGACTGGAATTTAATGTTATCAAGAGTGTGCCATCATTT	........((((((.((((((((.((((((....((.(((.((((((...((((...)))))))))).))).)).................(((......)))..((((..............)))).(.((.(((((......))))))).).(((..(((((((((...))))))))).)))))))))..))..)))))).))))))........	-47.4	A3-m0031-5p	-	5	5	-	ATATATTTGATCAGGGATTCA	-
	novel_mir_61	Chr4:17474107:17474276:+	CACCAAGCAATATGTTGTCTTCTTCACCAGTGCATGCAGATCCTTTTCTCTATAGCTACAATTTTAGGATGGGGAGACGTGAGGAATCAAAATATGCGAAGGATGTGCGACTCAGGAACAAGGTTAGTTACACAACCCACTGGTGCTGAAGTAGGGATGTAGGTTCCAGA	.....(((.((((.((..((((..((((((((..((((.((((((((((((((..(((......))).)))))))....(((....)))........))))))).))))............((((........))))))))))))..))))..)).))))..))).....	-45.2	-	A3-m0032-3p	8	-	7	-	CTGGTGCTGAAGTAGGGATGT
	novel_mir_160	Chr4:25955771:25956094:+	AACAAACCTGACACCGTGACAGCGATCTCCTGCAACGTTGGAGATGTCGTAGAATTTGTTTACACCGTGCATCGCATGCACTTGGTAGGTGACGTGGGTTTGACCGCTTGAGGCTCTGATTAGTTAGATCTTTCTAATCTAACGGTGAAGGCCCTGGTTGTTCTCTTTCGATAATATAAATCCGGTTTCATCAATTTAAGTGAAAATCAAGGATGATATATTTTTGCTTTTTATCATAATTTATATGATTTTCTAAAACTATTAAAGTATCATGTGATGTCTTAGAAGCGTATGTAGAATGTCATGTGATGGTTCAGAAGCATT	.......((((.(((((.(((..(((...((((((((((.(((((((((((((....(((..((((((((((...))))))..))).)..)))((((......))))....(((((((.(((((((((....))))).)))))))....))))...............(((.((((((.((((..((((((........)))))).....))))..)))))).)))......((((((.....))))))........(((.....))).)).)))))))))))...))))).)))))...))).))).))))))))).......	-78.8	-	A3-m0033-3p	9	-	9	-	ATGTAGAATGTCATGTGATGGTT
	novel_mir_152	Chr4:9093013:9093131:-	ATGGTACAATCCTCTTCCTGCTGAGCCCCCTTTCTCCTCGGTCCACAGAGAAAAAATGGAGGACTGGTGCCGACAGTTCATCACGGAAGAAAGAACTCACAGAGCCGGGATTGCTAACT	......(((((((....(((.((((....((((((((.((((((.((.........))..))))))(((..((....))..))))).))))))..)))))))....)))))))......	-30.3	-	A3-m0034-3p	14	-	14	-	AGAAAGAACTCACAGAGCCGGG
	novel_mir_152	Chr4:9169416:9169536:-	TCATGGTACAATCCTCTTCCTGCTGAGCCCCCTTTCTCCTCGGTCCACAGAGAAAAAATGGAGGACTGGTGCCGACAGTTCATCACGGAAGAAAGAACTCACAGAGCCGGGATCGCTAACT	...((((...(((((....(((.((((....((((((((.((((((.((.........))..))))))(((..((....))..))))).))))))..)))))))....))))).))))...	-28.2	-	A3-m0035-3p	19	-	18	-	AGAAAGAACTCACAGAGCCGGG
	novel_mir_152	Chr4:9201291:9201411:-	TCATGGTACAATCCTCTTCCTGCTGAGCCCCCTTTCTCCTCGGTCCACAGAGAAAAAATGGAGGACTGGTGCCGACAGTTCATCACGGAAGAAAGAACTCACAGAGCCGGGATCGCTAACT	...((((...(((((....(((.((((....((((((((.((((((.((.........))..))))))(((..((....))..))))).))))))..)))))))....))))).))))...	-28.2	-	A3-m0036-3p	19	-	18	-	AGAAAGAACTCACAGAGCCGGG
	novel_mir_64	Chr4:13025823:13026157:-	AGTTACTGTTATTCTCCTACTAGGTTTGTTCCTGGCCTCCTGGGCATGGCAGGAATTGGAAACTATTCAGGCACCTTCGATCACCTTGATCCCAGGTCTGGTTGATCTCAGGCCACGCAAGTTCCTTGGATGCTCACATATAGTGCCTGTCAGCCGCCCATGGCCCGCCGTGGCAACGTGCTGCAGACTTGGTAAAATGCTGTTTCACTCTTCGGTGTGATAAGCACACACTAATACGGATGCCCAGGAGAGACCCTAGCTGGTGGTGGCCTGGCCCGGCGGTGTCTCTACTATGCCTAGCGATTGGATAAATTGGTAGAGTGGATGCAGCTGAT	.((((((((.((((.((((((((.(((((((..((((((((((((((.((..((((.(....).))))..))......(((((...)))))(((((((((........(((((((..((((...))))..))............))))).((((((.((((((....))))))...)).))))))))))))).....((((...((((........))))..)))).............))))))))))).).))(((((((((((.((((((......))).))).)))))).).)))).....)))))))))))))).).)))))))).))))	-112.6	-	A3-m0037-3p	10	-	10	-	TGGATAAATTGGTAGAGTGGA
	novel_mir_65	Chr4:14571152:14571268:-	CATGTAGAAGACTGATTTGTCTTGGATGTTTGATGTCACGCCCAGAAATTCACGAACCAGAATTTCTAAGCTGAATATGCATTAAATCCCTGTCCAGGACCAGCCAGGGTATACAAA	..((((.....(((.((.((((((((((((((((((((.((..((((((((........))))))))..)))).....)))))))))....))))))))).)).)))....))))..	-34	A3-m0038-5p	-	18	18	-	ACTGATTTGTCTTGGATGTTT	-
	novel_mir_65	Chr4:15194360:15194476:-	CATGTAGAAGACTGATTTGTCTTGGATGTTTGATGTCACGCCCAGAAATTCACGAACCAGAATTTCTAAGCTGAATGTGCATTAAATCCCTGTCCAGGACCAGCCAGGGTATACAAA	..((((.....(((.((.(((((((((((((((((.(((((..((((((((........))))))))..)).....)))))))))))....))))))))).)).)))....))))..	-35.5	A3-m0039-5p	-	18	18	-	ACTGATTTGTCTTGGATGTTT	-
	novel_mir_140	Chr4:17488209:17488303:-	GGCCGTGGCCAAGTGTGTAATGTTGAACGGACTGCTTCTCTGGCCCTTGTCACGTCTTCTTGTTCAGCATTGGATTGGGCTTGGCGTCAGGACCA	((((...(((((((((.((((((((((((((..((.....((((....)))).))..)).)))))))))))).))...)))))))....)).)).	-32.8	A3-m0040-5p	-	9	9	-	AAGTGTGTAATGTTGAACGGA	-
	novel_mir_68	Chr4:17720762:17720925:-	TCTCCCGTCTGGCTCCTCGCCCATTCGGCCGTTCCGGGATTGGGATTCGATGACATTTCCCCATGACATTCTCGATGATTGAGTCACTACACGTGGGTCCAGGCTCATGTGGGTCCCGCATGTCAGTGACTCAATGTCACTGAGAATGTCACGGGTCACGGGGG	.(((((((..(((.....)))(((.(((..((((((....)))))))))))).......(((.(((((((((((.((((((((((((((((.(((((((((........)))).))))).))).)))))))))..)))).))))))))))).)))..)))))))	-74.8	-	A3-m0041-3p	10	-	9	-	ATGTCACTGAGAATGTCACGG
	novel_mir_141	Chr4:18145360:18145640:-	CCTCGCAAGTCGAGCGGGTTGGAAGATGGATCCGAAGAATTACAGTTTTTAGAACAAAACACAAATATTGTAAAGAAGGTTGAGATGATAACTAAGCTTTGGGCGACGCACTGTGGTTGATCTAGAAACAAGTGTACCTTGGTGCAGCGTATTGAGCAAGTGGCATTTCCTGGTGCCTCTTTTTCCAAACACTCTGATCAGGTGCATATAGGTCTCATTTGCTTATGCAAGCTAGAATAGTTGCCTCTTTCATGCCACTTCTGTAACTGGGTTGCTGTGGC	..(((((.(.(((.(.(((((((((.(((....(((((......(((((((((.(((..((((....((((...((((.(((..........))).))))..)))).....)))).))).)))))))))..((((((((.(((.(((.((...(((.(((.((((((....)))))).))).))).....)).))))))))))))))((((((.......))))))((((.(((...))))))).)))))....))))))))..)))).).))))))))).	-74.3	A3-m0042-5p	-	6	5	-	CGAGCGGGTTGGAAGATGGAT	-
	novel_mir_152	Chr4:19102601:19102721:-	TCATGGTACAATCCTCTTCCTGCTGAGCCCCCTTTCTCCTTGGTCCACAGAGAAAAAATGGAGGACTGGTGCCGACAGTTCATCACGGAAGAAAGAACTCACAGAGCCGGGATCGCTAACT	...((((...(((((....(((.((((....((((((((.(((((((...........))))((((((.......)))))).))).)).))))))..)))))))....))))).))))...	-29.5	-	A3-m0043-3p	19	-	18	-	AGAAAGAACTCACAGAGCCGGG
	novel_mir_71	Chr4:30081881:30082098:-	TCATTTTCACTTTGGGCTAGGTATTTTCACCTTTGTTGCAATTTGGACTACCCTAAACCACTTCTTCAGCACATCAATTCCAGCCCACCGGTGAACTCCTCCACCTCTTTGCAGATTCATATCTTTGCTGGAGGAGAGGCCAGACATGGCTAGGGAAGAGAGTTGAGGTGGTCCAAAGTGCAACAAAGTAAAAAATACCTGGTCCAAAGTAAAAGATT	...((((.(((((((((((((((((((...((((((((((.(((((((((((.............(((((...((..((((.(((....)))...((((((((.......(((((........))))))))))))).(((((....)))))..))))..)))))))))))))))))).))))))))))...))))))))))))))))))).))))...	-91.4	A3-m0044-5p	-	6	6	-	TTTGGGCTAGGTATTTTCACC	-
	novel_mir_161	Chr4:30712317:30712471:-	TTGCCATGCACTGTGAGGAGGAGAACGGGATGCAGCCAAGGATGACTTGCCGGCTCCTGGTATTGGGGGAATCTCAGCTTTGCTGAAGCGCCTTGGAGTTAGCCGGCAAGTCTGTCCTTGGCTACACCTAGCTCTCTTCTTCTAGCGTTTGGCTC	..((((.((.(((.((((((((((.((((.((.((((((((((((((((((((((.......((.((((....(((((...)))))....)))).))...)))))))))))).)))))))))).))))).).))))))))))))).)).))))..	-81.6	A3-m0045-5p	-	5	5	-	CTGTGAGGAGGAGAACGGGATG	-
	novel_mir_143	Chr5:1441474:1441705:+	TCATGTCCTCCTCGTCGTAGTCGTCGTCGTCGTCGACGTCTTCCTCTTCTTCTTCCCTCACCTCCTCTTGCTCTTGCACGGATGCCATCTCTTCTTGCCTCTCCTCGTGCTGCGCTTCCGCCGCCGCCGACGCCTTCTGCGACTTGCGGGGAGAGGGCGCGGCGATCTCCGCGGCGGCGGCGGCGTCCTTGGTCGGCGAGGGCGCGGCGGCGACGGGGAACCTGGAGGTGAG	((((.(((((((((((((.((((.((((.((((((((...............................(((....))).(((((((..........((..(.......)..))(((.((((((((((((.((((((((.(.........).)))))))))))))......))))))).))))))))))...)))))))).)))))))).))))))))))....))).)))).	-108.5	A3-m0046-5p	-	10	9	-	CTCGTCGTAGTCGTCGTCGTC	-
	novel_mir_72	Chr5:3086479:3086703:+	ACTAGTGAATGGAAGGTATCAGGAATTTGGATCCCTCTTTGTCATTCCTGCATGGAGTAGTTTTAACCTCTTGAATCTTGATGGTGCCTCCATTAGGTTGGTTTAAATAATAACCTAGCCTGTTGTCTCATCCAAGTCTCTAGATTTTATTTTGTATGCTTGCATGGCTCTAATCCATTTTCTGTTGTCAGGATCTGAATATCTTGAGCATCCAGTTGTGCTAGA	.((((((..((((..((.((((((((((((((((((((.(((.......))).))))...........(((.((..((((..((((....((.((((((((((........)))).)))))).))...))))))))..)).)))........((((....))))((((..................)))))))))))))).)))))))).))))....)))))).	-56.4	-	A3-m0047-3p	12	-	12	-	CTGAATATCTTGAGCATCCAG
	novel_mir_152	Chr5:12975844:12975964:+	TCATGGTACAATCCTCTTCCTGCTGAGCCCCCTTTCTCCTCGGTCCACAGAGAAAAAATGGAGGACTGGTGCCGACAGTTCATCACGGAAGAAAGAACTCACAGAGCCGGGATCGCTAACT	...((((...(((((....(((.((((....((((((((.((((((.((.........))..))))))(((..((....))..))))).))))))..)))))))....))))).))))...	-28.2	-	A3-m0048-3p	19	-	18	-	AGAAAGAACTCACAGAGCCGGG
	novel_mir_162	Chr5:21070189:21070333:+	ATGTGTTATGATGGAAAGTTAGAAGTTGAGGGAAAGTTGGGTGTGAACTAAACAAAGTCCTAGTACTGACAGTAATCGTAACTCGTAATGTCTTGTTTAACTTCTATTTTTTTAAAAAAACATCACATCGAATTTTTGATATATG	..(((((.(..(((((((.(((((((((((.((..((((.(.((.......((...(((........))).)).......)).).))))...)).))))))))))).)))))))..).)))))...(((((....))))).....	-25.9	A3-m0049-5p	-	11	11	-	ATGGAAAGTTAGAAGTTGAGGGA	-
	novel_mir_163	Chr5:24598137:24598240:+	TTCGGCAGCAGCGGTGGTGACCGTGACTGCGGTCACCGAAGGCATGACGACTTCGGTCGGCTAGCCAAGGGCGTGGCAGACGGCTACTTCTGACTGGTGTGGCA	..(.(((.((((((.((((.((((..(((((((((((((((.........))))))).)))).(((...)))...)))))))).)))).))).))).))).)..	-43	-	A3-m0050-3p	15	-	15	-	TGGCAGACGGCTACTTCTGAC
	novel_mir_75	Chr5:29688157:29688507:+	CTTACTCCTTATCTTTTCAGTTCTTGTTCCAATTCCGATTACGGTGGTGGCCCATGTAATTAAAAGGCCCATATATATATAAGCTGGCAAGGCCGCAAGACTGAAGAGGAGAGGCAATGCCATGCATGCAGATGAAGATCGCTTCTCTTGTATGTAAGTATGTATGTAGAAGGAAAATAAGGGGGAATATATATAGTAAAATAGTAATTCAGGAGTGGTGGGTGTTCCTGAAAGAGCTCATGGCCACAGGGCTTAACATAGAATCATCTTAATTGTGCGGAAGAAACAAAGCATGCACGCGCAGGAGGATGGAGTAGTAGAATGGATGGATGGATGGATGGATGAGGGTAG	.((((.((((((((.((((.(((((..((((.(((.(((((((.(((....))))))))))...((((((.((((((((((...(((((..(((......((....))....)))..)))))(((((((((..((((....))))..)))))))))..))))))))))................((((...(((......)))...))))....(((((.((.((((......)))).).).))))).)))))).........(((((((..(((((((..................))))))).))))))).......)))))))..)).))))))).))))))))))))	-96.7	-	A3-m0051-3p	20	-	20	-	AATGGATGGATGGATGGATGG
	novel_mir_79	Chr5:25105550:25105704:-	TCAGCTGGAGCTTCTGTAGGATCAGGTTGTTCGTTTCAAATTCCCCATGCATCTCATTCTTAGGGCACCACTGGTTTCTCACAAATCAGAGTAAGGGAATGGTCTGAGATTTGCAGTTTCCGAATGCCTGGTTTGTCCAGAGTAGTAGCAGCCTT	...((((..(((((((..(((((((((.(((((..............((((......(((((((.((((.((.....(((........)))..))))..)).)))))))..)))).....))))))))))))))...))))..)))..))))...	-41.7	A3-m0052-5p	-	11	11	-	CTTCTGTAGGATCAGGTTGTT	-
	novel_mir_164	Chr6:7840964:7841300:+	ATCTCACTGACACTGTCCATGAACTGTACAGAATTCAGAGATTATTCAGTTAAATGCATGCAACAATTGTTAGCTTAGTCAGCGATAGCGCTGGCGGCAAAAATCAAGAAAGCCATAGCAGAAGCAAAACGACCTTATCGCTTAGCTTTTGATTTCTTTTTCCTCTTTTACTCTTAGTCTTAGAGATTAGCATATACTCCCTTCGTCTTAAAATATTGAAACCTAATACTAGATTAGACACATCTTAGTAGTCCCTTGTATAAGATGTGTCTGTCCTGTTCGTTTCTTCTGCAGCCAGAGGATAAAATTTTGGATACTCGTGGCATGTTTTTCAAAC	........((((.((.((((((..(((.(((((((..(((((.....(((...((((..(((((....))).))...(((((((....)))))))(((.............)))....(((((((.((.(((.....))).)).)))))))...........((((...(((...)))...))))....))))..)))......)))))..................((..(((.((((((((((((.............)))))))))))))))..)).....(((((((....)))))))...))))))).))).))))))))))))........	-74.2	-	A3-m0053-3p	31	-	31	-	AAATTTTGGATACTCGTGGCATG
	novel_mir_87	Chr6:4740913:4740987:-	TTGGTGAGTTTGTCTTTCAACTGTGTAATTGCATTGACAATGTTATGAATAGTACTGAAGGGCATAAATTCAGTA	.((.((((((((((((((((((((...((.(((((...))))).))..)))))..)))))))))..)))))).))	-20.2	-	A3-m0054-3p	5	-	5	-	ATGAATAGTACTGAAGGGCAT
	novel_mir_165	Chr6:24663460:24663548:-	CCACCATAGGTGGGCAATAGTCTTCCTGCCCCGCTGGATGATAGCAGTTTCAACCGGTAGCATGAAGGCTTTGTTCGCACTAATGCGTG	.((((((((((((((((.(((((((.(((...(((((.(((........))).))))).))).))))))))))))))).)).))).)))	-36	-	A3-m0055-3p	5	-	5	-	AGCATGAAGGCTTTGTTCGCA
	novel_mir_90	Chr6:26473452:26473802:-	TCACTATTTAGTTGCCATTTTGTTGCACATTGCCATTCCTCTTCTCCCTCTCTCTGACTGCATGAGTACGTATGTACTCTGCTTAGAGCAAGTTTAATAGTACTAGCTAAATGCTCGTGCGTTACAACAGAATTCTAAAAGAGAACTTCATTTTTCTAAAACCATTCCCCATTGTCGACTCACGAGACTATAGATGCATCAATAAAATTTTATTGGTTAGCTCGCATGACAAAATGATTCCTAATCATGATCCTAACTTAAAGTTGCTATTAAATTTTCTAATGGATTTTTTGCGATTTCGATAGCCTGGTTTTCTTGAATGGCTGTGATGATTTGGCTGCCCCCTCGAGA	..........((.((((..((((((((....(((((((.......((....((((((..(((.((((((....))))))))))))))).(((((((((((((((..(((....((((((.(((((((..((((......((((((......))))))......))))....)))).))).))))))....)))......((((((....))))))(((((....(((((...............)))))...)))))....)).))))))))))))).(((.((((...........)))).)))...)).......)))))))))))))))..)))).))..........	-80.7	-	A3-m0056-3p	35	-	35	-	TGGCTGTGATGATTTGGCTGC
	novel_mir_92	Chr6:28336875:28337042:-	GGGCATGAGAAGTGTCAGGATGTGCCGAAATGGAACTCTGATCTGATGCTACCATGGAGCTGGTCACGGACCATACGTGAGTGAGCCCTTGGCGAGTACGTTCATGGCTGGCGCTTGATTCATCGTTTCTTGGGAGGATCATGTCGGCATCCATGGCGCGATGGTGGC	.(.(((.(...(((((((((..((((((.((((..((((((((...(((((((((((((((.((((.((.((((......))).).)).)))).)))...))))))).)))))...))))............))))..)))).))))))))).))))))..).))).)	-60	-	A3-m0057-3p	14	-	14	-	ATCATGTCGGCATCCATGGCG
	novel_mir_93	Chr7:5730180:5730396:+	AAACTCCCGCTGCATCTCATGTTCTATCCTGATCCTCAATCCAACACCACTTTACTAAGCAAAAGTTATATGCGCGAAAATTGTTGTGTTTACGATACACAAAATTGCAAAACAAAGTGCTGCTGAATTCTATAAGAATGGGAAGCATTCAGAAAGCAAGAGTTTTTCCAAGAGAGGCAGTACTGCAGTAGAACAAGAGCATAGCAGCTTGGCTCCA	.....((.((((((((((.(((((((..(((.................(((((........))))).......((((...((((.(((((...)))))))))..)))).......(((((((((...((((.......(((((((.((((.........))))))))))))))).))))))))).)))))))))).))).)).)))))..)).....	-50.6	-	A3-m0058-3p	9	-	9	-	AGTAGAACAAGAGCATAGCAG
	novel_mir_94	Chr7:6434033:6434328:+	TATGTAGCCAATGTAAGAGGTCGGTCATGATTCTTGAAGCCCTGCGGTACTTCCTATTGAAAGAGATGGAGGCGGTATGTATAGCTGATTGATCCGTTTGTTGCCATAGGAGCAAACTTCTCTTTATCCCCCTTGACTCTTCAAACACCTTTGATAAGGTCTTTGCTAGAAGACTAGAGCACTAGACAAAAAAACAATGGGATTCACATGTTCTTGGTAGTTTGGCCAATTTGGTGTCTTCTCGGCATAGCATGGGCGACCTTCGGCATTGAAAATACTTTCTTGGTGCTTGCAGC	..((((((((((((..(((((((.(((((......((((((....))..))))...(((((.(((.(.((((.((.(((...((..(.(((.(((...((....))..))).))).)..))...))).)))))).)))))))))..(((((....)))))((.(((((((((((((((...((((((..((.((((.((.......)))))).))....))))))....))))..))))))).)))).))))))).)))))))..)))))).....(((.....))))).))))..	-73.9	A3-m0059-5p	-	20	20	-	ATGTAAGAGGTCGGTCATGAT	-
	novel_mir_95	Chr7:7071638:7071891:+	TACATTGTTTCGTCTATTTTCTCTTTTCTTGGATGAATCTATTGGCATTTGAGCATGTCTCATGGCCTATTAGATTTCTTTCTTAAGTGCTATCATAGTATTATAATAGGCTTAGTAGGTATCAGGAATAGAAGACCGAGCACATTCAGGCATGGTAGGATCAAACTCTGGTACAATTGTTCAACATGGAAACCACTGTCTCAGGCAAAGTCTATATGTTTCTCCAGAAGACGAGAATGGGTATTAGAAGATGT	.(((((......((((((((((((((...((((.((((.(((.(((.((((((((((...))))((((((((((......))...(((((((...))))))).)))))))).......((((((((....((..((((.((........)).))))....))....)))))))).........((((((...))).)))))))))....))).))).)))).))))))))).)))))))))........)))))	-56.6	-	A3-m0060-3p	7	-	6	-	CCAGAAGACGAGAATGGGTAT
	novel_mir_152	Chr7:14235092:14235212:+	TCATGGTACAATCCTCTTCCTGCTGAGCCCCCTTTCTCCTCGGTCCACAGAGAAAAAATGGAGGACTGGTGCCGACAGTTCATCACGGAAGAAAGAACTCACAGAGCCGGGATCGCTAACT	...((((...(((((....(((.((((....((((((((.((((((.((.........))..))))))(((..((....))..))))).))))))..)))))))....))))).))))...	-28.2	-	A3-m0061-3p	19	-	18	-	AGAAAGAACTCACAGAGCCGGG
	novel_mir_68	Chr7:538371:538488:-	GTGATATTCCCCTGTGACATTCTCGGTGACATTGAGTCACTGACATGTGGGTCCAGACACATGTGGGTCCCACATGTCAGTGACTCAATGTCACTGAGAATGTCACGGGGGAATGTCA	.((((((((((((((((((((((((((((((((((((((((((((((((((((((........)))).))))))))))))))))))))))))))))))))))))))))))))))))))	-102.7	-	A3-m0062-3p	14	-	13	-	ATGTCACTGAGAATGTCACGG
	novel_mir_98	Chr7:6418469:6418621:-	ACCAACTTGCACGCATTTAGAGATCCTTCATTGGACATGTACGTGAGCATGAGCACGAGCACGAGATTCATCATGTGGCAGAGCACGAGTAAGCTACCCCAATGGATGTAGTCGCAAGCTACCCAATCTAGGACTGGCAGCATGTAAACCTGG	.(((..(((((.((..((((...((((..(((((.(((((......)))))......(((....((((((((...(((...(((........)))...)))...)))).))))....)))..)))))..))))))))..)).)))))...)))	-37	-	A3-m0063-3p	18	-	18	-	CCAATCTAGGACTGGCAGCAT
	novel_mir_102	Chr7:18540269:18540523:-	TGAAACGGAGAGAGTAGATTTTAGGAAGGCAGCACCATACCTGCTTGGGAGCGTGGAGTTGGAAGAGGCGCACGGGGGGGGGGGGGGGGTCGAAGATGGGCATAAGCCCCTGCGACAATGGCCATCTCGCCCACGCCGGCCACCACCACCTCCGATTCCAAGCTCACCGTTGACTTCTTCATCCTCCCCTCCAACTCCAAGCAGGTATGGCGCAGCCTTCTTGCTGCTTTCCTAAAATCTACTCTCTCCGTTTCT	.((((((((((((((((((((((((((((((((((((((((((((((((((.(.((((...(((((((((.(((((((((((((((((((((..(.(((((....(((..((...))..)))......))))))..))))).)).)).))))).........))).)))))).)))))))...)))))))).....))))))))))))))...........))))))))))))))))))))))))))))))))).	-141.6	A3-m0064-5p	-	5	5	-	AGAGTAGATTTTAGGAAGGCA	-
	novel_mir_130	Chr8:2695274:2695415:+	CCTTCTTCCATGAGTGAGGATCCTCTACCATAATGTTACTACCATTATAGCCACTGGTATATGGGTCCACCCTTATATTACCACACATGCGACTTTAATGGTAGTGTTATTATGGTAGAGGATGTGAACCCATTATTTTTCT	.........(((.((..(.((((((((((((((((.(((((((((((.(((((.(((((((((((......)))))).)))))....)).).)).))))))))))).)))))))))))))))).)..)).))).........	-54	-	A3-m0065-3p	10	-	10	-	ATGGTAGAGGATGTGAACCCA
	novel_mir_152	Chr8:9253154:9253274:+	TCATGGTACAATCCTCTTCCTGCTGAGCCCCCTTTCTCCTCGGTCCACAGAGAAAAAATGGAGGACTGGTGCCGACAGTTCATCACGGAAGAAAGAACTCACAGAGCCGGGATCGCTAACT	...((((...(((((....(((.((((....((((((((.((((((.((.........))..))))))(((..((....))..))))).))))))..)))))))....))))).))))...	-28.2	-	A3-m0066-3p	19	-	18	-	AGAAAGAACTCACAGAGCCGGG
	novel_mir_108	Chr8:18672868:18672961:+	TGGATCGGCCACACAGAGTCGCGCAGTGGTACACTTTGGCCGGTCGAATGCCCTCGCCATTTTCTCTTGTGGTTGACTTTTTGTGTTCGATCCT	.(((((((.((((.((((((((((((.((.......((((.(((.....)))...))))....)).)))))..))))))).)))).))))))).	-33.3	A3-m0067-5p	-	23	22	-	ACACAGAGTCGCGCAGTGGTA	-
	novel_mir_109	Chr8:2458805:2458892:-	TCAAACTGATCCAGGGAATTGAGTGTATGGCGGCTAAGCTCATTGTAGCCACTACGGCCCTACATGTCAGCTCCATGGGTAGTAGGAA	((..(((.(((((.(((.(((((((((.((((((((.........)))))......))).))))).)))).))).))))))))..)).	-28.3	A3-m0068-5p	-	6	6	-	CCAGGGAATTGAGTGTATGGC	-
	novel_mir_166	Chr8:4052080:4052171:-	TGTAGCGCTCTCGCTGTACGAGACCGAACGGTCTCACTGTTTCCTCGCGCGAGATCGAGACCGCGCGGTCTATCGTGCAAGACCATGCACAT	(((.(((...((..((((((((((((..(((((((...((((((....).))))).)))))))..)))))..))))))).))...)))))).	-36.6	A3-m0069-5p	-	9	9	-	TCGCTGTACGAGACCGAACGGT	-
	novel_mir_114	Chr8:21478226:21478419:-	GGAGAGCTGACAGAAAGAGAAGTGAGCACGCAGCGGCAGCTGTATCATCATCATCATTTCATCTCTCTCTCTCTCTCTCTTCCATGGCCGCCGACGGCCTCTCTTTCTTTCTATCTAGCTATCCTGTCGAAGGGAAGATTGATAGATCGATGCAGTCTGGCCGCTGTGTGCTCACTCTCTTCTGTCAACTGCCA	((..((.((((((((.((((.((((((((((((((((((((((((((((((((................................(((((....)))))..((((((((((.................)))))))))).)))).))).))))))).)).)))))))))))))))))))))))))))).)).)).	-85.6	A3-m0070-5p	-	6	6	-	CAGAAAGAGAAGTGAGCACGCAG	-
	novel_mir_114	Chr8:21491228:21491421:-	GGAGAGCTGACAGAAAGAGAAGTGAGCACGCAGCGGCAGCTGTATCATCATCATCATTTCATCTCTCTCTCTCTCTCTCTTCCATGGCCGCCGACGGCCTCTCTTTCTTTCTATCTAGCTATCCTGTCGAAGGGAAGATTGATAGATCGATGCAGTCTGGCCGCTGTGTGCTCACTCTCTTCTGTCAACTGCCA	((..((.((((((((.((((.((((((((((((((((((((((((((((((((................................(((((....)))))..((((((((((.................)))))))))).)))).))).))))))).)).)))))))))))))))))))))))))))).)).)).	-85.6	A3-m0071-5p	-	6	6	-	CAGAAAGAGAAGTGAGCACGCAG	-
	novel_mir_167	Chr8:24548749:24548986:-	CCTTGACCCACCCCCTCGCGATTCCCCCTATCGGCTAATTCGGCCTCACGCGCACACGCGCCACACCCTCAAAAAACCCAAACGCTAACCGCGCGCGCCAGCCCGAGCACGCGTTCTCCGTCGATCAATCTGATCTCCCCCGTAAAACGAATAGACGGAAGAGGTTCCTCTGACGTGAACAGTCCCGTCCTATGACGTGGCCATTGATAGGTGGGTCCGTGAACGGTGGAGCTCACAT	...(((((((((...(((((...(((((((((((((.....))))....((((....)))).....................(((.....)))((((...((....)).))))((((((((((((((...))))).....(((...)))....))))).))))(((((......).)))).(((.((((....)))).)))....)))))).)))..)))))..))))).).)))...	-71.7	-	A3-m0072-3p	6	-	6	-	GATAGGTGGGTCCGTGAACGGTG
	novel_mir_168	Chr9:19261805:19261888:+	ATACTCCCTCCGTCCCAAAATATAGTTGCCTTTGTAGTTCAAACAAAGGTACAAAGGTAGCTATATTTCGGGACAGAAGGAGTA	.((((((.((.(((((.(((((((((((((((((((.((.......)).))))))))))))))))))).))))).)).))))))	-45.4	-	A3-m0073-3p	8	-	8	-	AAGGTAGCTATATTTCGGGAC
	novel_mir_169	Chr9:6560216:6560371:-	GCTGATCAGCGTGGGTGTACGGCGAGGAGAACACACGAGGAGGAGAAGGTCGAGCCGGTGCGATCGACTACTTCCTCTACATCGATGCGCGCTACTTCGCAAGAGTTCCTTCGACTTCTTAGCGTCTTCTTCCGCTGCGCAGCGCGTCGAGTGGTA	(((..((.(((((..(((.(((((.((((((.((.(((((((..(((((.((((..(((((((((((..............))))).))))))..))))........)))))..)))))).).)).))))))))))).))).))))).))..))).	-57.6	A3-m0074-5p	-	12	12	-	GTGGGTGTACGGCGAGGAGAA	-
	novel_mir_151	Chr9:8887629:8887837:-	GTGGAACATGAACAGCAAGACTCTGTTGCATAAGTGCATGTTTGTTGAACTGGAACTGTATACGAAGGCATTCGTATGAAATTTGATTGAGTTGTGCTCCTCCAAAACAGTTCAAACAATATTCTGCTAGAGATTAACATCCAGGGAACGTTGAATTCATATATTATTAGTCTTTCCATGCAAATCAGAGACTCTGGTGTTCAGTCCAG	.((((.(.((((((.((((.(((((((((((....(((.(..(((((.....((((((((((((((....)))))))....((((...((((...))))...)))))))))))...)))))..)))).(((((((((........(((.......)))........)))))))))..))))))..))))).)).)).))))))))))).	-53	A3-m0075-5p	-	6	6	-	AACAGCAAGACTCTGTTGCAT	-
	novel_mir_75	Chr9:18868646:18868929:-	CGCGGTCGCTGCTCGCCGTCTCCGACTACTTCCACCGCCTCCGCACCCTCAGCTCCCTCTGGGTCACCCGCCCCAGGCACCCGCCTCACGACCACCAGCCGCCGCCGCACTCCGCCGCCCCCCACACCTGAGATCACCGCCGCCGGCAACGCATGCAAACACCGTAGCTCTTAGCTAGCAGCTTAGAGATATCGAGAGATCAGAAATTAAGCGATCGATCGAGAGAGGACGACGACTGTGAAACCCCCCATGGAATGGATGGATGGATGGATGGATGAACCGAT	..((((.....((..(((((((((.(((.(((((.........(((..((..(((((((.((((.....)))).((((....))))...........((((.((.((..(((.................))).....)).)).))))......(((.......))).((((.((((...)))).))))...((((..((((...........))))..))))))).))).)..))..)))..........)))))))).))))..)))))..))....))))..	-68.1	-	A3-m0076-3p	20	-	20	-	AATGGATGGATGGATGGATGG

## Sheet: B1
	miRNA ID	Location	miRNA precursor	structure	MFE	Id(5p)	Id(3p)	count	count(5p)	count(3p)	mature miRNA (5p)	mature miRNA (3p)
	novel_mir_166	Chr10:14193529:14193796:-	TGTGAGTGTGAGGAGTCTTCTGGTGGTTGGGGACTTGATGTTGGCACAGAAAGACCATCTGAAGGAGCCTATTTATCACTGATGGAATTTATGTGTTGGTTTCCGGCTTCCATATATACAGCCCCGGCCCAGGCACACAGGGAGTCCTTACGAATCCACGCCACTGCTTGAGAAACTATGATGTCAACAAGTAGTCTAAAGCATAGGGTTTGGGAGTCATCTGGATGTCACTTCTAACATCAAGTAAATCTGGACCATGTAATTTACC	.((((((...............((((((.(((((((((((((((((((.(((..((((((((.(((.....))).)))..)))))..))).))))..((((...((((...........))))..))))..((((..((((((.(((...(((((((..((.((((((((....((......))...)))))))).....))...)))))))))).)).))))..))))....))))))))))))...))).))))))...)))))).	-76.7	-	B1-m0001-3p	16	-	16	-	CATCAAGTAAATCTGGACCAT
	novel_mir_2	Chr10:14220313:14220408:-	AGACATCTGGATATCACTTCTGATGTATTCCTTGGTGTAAGCTACTGAGATTTGGTATGGTAGTTTCTGTGGCACTTGCACAAGGACCAGTTTTAT	......((((((((((....))))))..((((((.((((((((((.((((((.........)))))).)))))..)))))))))))))))......	-28.1	-	B1-m0002-3p	715	-	715	-	TCTGTGGCACTTGCACAAGGA
	novel_mir_167	Chr11:23054542:23054867:+	GTACGTTCTTCTGGCCATGTGAGAGAAGCATGAGAGTTAAGAACAGCGACAACTGAAGGAGAGGAAAGAATGCTCTGTGATCACTCTAGCTCAGATGCAGTAGTTCCTGATACCTCCAAAGCCTGTTGCTTCAGACAATTGGGTGATAGGCAAGACATTCAGAAAGTATTACTATCTTCTTCGTTCTTTGTAGTCTGCACATGCACCAGACTTCATAGCTACAGCTCTAGGGGAAAGATCAATATCTCGACCACGTTATGTTATAGCTAGCTCTGTTCCAATATTATTTTCTTCATTACTTAGATTGTGGCATATGTGGAGGTACA	((((.(((.(((((.(((((((((...(((.(((((..((((((((......)))..(((((((((....(((((((.(..........).)))).)))....))))).....))))...((((((((((.((......))))))))))))..........((.(((...))).)))))))..))))))))..))).))))))..)))))...(((((((((((.((((((((((((...(((((...(((...((((.((....))))))...)))...))))).))))))......))))))))))))).)))).))).)))).	-82	B1-m0003-5p	-	25	24	-	CTGGCCATGTGAGAGAAGCAT	-
	novel_mir_168	Chr11:24453120:24453312:+	CAATTTGTGTTGTAGGCATGCAAACTTGGTGGGCCAAAAGATCCTGATACCTCACAATCCTAGCCGCCTCTGGTATAAACCAATGAAAAACATTATTCTCCTTCAAAGTGTTTTTATCATGGAAAATCAAATTTGCTTTACTCGAGGAGTATGTAGGTCACCCACCTAGTTATGTGCTTGGAGAGATAGCTGT	....((((.((.((((((((..((((.((((((......(((..(((....)))..)))...(((......))).....(((.(((((((((((............))))))))..))))))........((((((..(((((...))))).))))))..)))))).)))).))))))))..)).))))....	-42.4	B1-m0004-5p	-	13	13	-	TGTAGGCATGCAAACTTGGTG	-
	novel_mir_169	Chr11:26328650:26328845:+	GTGATCAACAACCATGAACGATGACAGAGTTGTACATTTTTTCTCACCTTCTCTGCTGATCTACATGTCGCACCAAACTCATAGTTTCTTAACTAAGCACTTTAAAACATAACCAGTTAGTACTGCTTCTGTTTAAATTATTTGGCTACCGCTAACCTATTCATTGTACAAGTGATCGATGGTGAATGATTGATTA	.(((((((((..(((.(.((((.((....(((((((.................(((.(((......)))))).........(((((....))))).........(((((.((.((((....)))).)).))))).......(((((....))))).........))))))))).)))).).)))..)).)))))))	-35.2	-	B1-m0005-3p	7	-	7	-	GTACAAGTGATCGATGGTGAA
	novel_mir_6	Chr11:26390432:26390548:+	AGGATCTTTTTGATGCTGTCTAACTAACTCGTTTCATGTTTCATGTTTTATCTTAATTGTAGCTGACATAAGAGCTCAATGTTGTGCAACTTGGTTTCGTAGCGTCAAAGATACACA	......((((((((((((...((((((...(((.((((.................((((.((((........))))))))..)))).)))))))))...))))))))))))......	-23.5	-	B1-m0006-3p	86	-	84	-	CAACTTGGTTTCGTAGCGTCA
	novel_mir_170	Chr11:26392185:26392409:+	TAGTAGTAATTGTTTCTGTTGAATTGAAGGCCAGGTTTCATCCATTGTCTAAAAAAATTTGTTTCTGAATAAAATCGTCAGACGCCATATTCCTTCATAAGTAACTAGTTAATTTGCGTTATAACTCCTAAGAGATGGCAAAGATATCTTCGAGTGTTCTTTAATTAGTCTGCAGCACCTGCTTGTTTATTTGGTCTTTCAAGTTAATCACGAATATTTCTGGTT	.(.(((.((.(((((.((((((.(((((((((((((........................((.(((((.........))))).))..................(((((((((...((......((((....((((((.......)))))).))))))...)))))))))..((((...))))......)))))).))))))).)))).)).))))).))))).).	-37.1	B1-m0007-5p	-	7	6	-	TGTTTCTGTTGAATTGAAGGC	-
	novel_mir_7	Chr11:8933462:8933545:-	GAAACAGTTCACCAAATAATTCTTTTGCATGTTTGATGGATTAATTATGTGGTCGATATGCGAGAGGACTTGGCTGCTAGTTAT	..((((((...((((....((((((((((((((.(((.(..........).))))))))))))))))).))))..))).)))..	-20.1	B1-m0008-5p	B1-m0008-3p	31	1	29	CAAATAATTCTTTTGCATGTTTGAT	CGATATGCGAGAGGACTTGGC
	novel_mir_8	Chr11:10007473:10007796:-	AAATCAGAAGTACCCACGTTAGCATTCATCAGGGATCACACAAAAACTTCCAAGTATTAACTGCACATTAACTTGGGACTTGGGAGCAGTACATTACATATACCAAACCATCCGTCCATCGGAATAGCACTGTGATGACCTAAAAATTAGAACATGGACCACATAGGAGTAGCTTATACAAGGCAAAACAGTAACGCAAAATGCTAGCATCTTCAGTAATTCAAGCATGCACGCATGCATGAGGAATCAGTAACATTTCTGATTGGTGTCGGCATTCTAATAGGGTTTAGGAGACATGGGGAATTTAGCGTGCACTTGTGGTAG	..((((.((((...((((((((.((((.(((.(..((.........(((((((((.((((.(........).)))).)))))))))........................((((.....))))...(((((((..((.(((.................((.....)).(((.....))).)))))..)))))...))..((((((.(((((........((((.(((((....))))).)))).((((((........))))))))))).))))))((((......))))))..).))).)))))))))))).)))).))))..	-74.1	-	B1-m0009-3p	26	-	26	-	ACATGGGGAATTTAGCGTGCA
	novel_mir_9	Chr11:12147701:12147994:-	GTTGGTCCAATTAATCGTCGATCAGGCACAATTAATTGTCCGATCAGAGCACCTATCGATCACCTTTTGAACAATTCTTAGGGTTTAGCACATGTGAATATGTGCTACTACTGCTGGTTGCTTTATACTAGGGCAAGTGACCATCTTGCCATCAATTATTAGTGCTGTGATTGCTTTATACTATGCACTATATAGAATATAGGTTCTAGTATTCATAGTACTGATCAGGTCGACTAATCGAGGCTGATCGACGATTAATTTTCCTGGTCGGTCCCTTGGTGATCAGGATCAATC	........(((((((((((((((((.(.(.((((.(((.((((((.((.......))))))(((((..(((...)))..))))).(((((((((....)))))))))......(((((........)))))((((((.......)))))).......(((((((((((((.((((..(..(((((..((....))..)))))..)..)))).)))))))))))))..)).))).)))).).).))))))))))))))))).(((((((((.(.....).)))))))))......	-102.6	B1-m0010-5p	-	48	47	-	TTAATCGTCGATCAGGCACAA	-
	novel_mir_10	Chr11:16493226:16493515:-	ACCGGCACCGATTTGTGTGTCTGTAGCGGTGTGTGACAATTACATCATGGATGAGCTCGCTTGTTCCCGTGAAATCGTCACCGAGTTCGCGCAGCATGTACGCGGACTCTGCCCAGAAATCTACTACCAACGAGAACTCGTTGCAAGTTCGTTTTCTGCGCACGCAAGTCATTTACTAATTGTTATATTTTGGGACGAAAGGTATTTTGGGACGGAGGGAGTAGTAGATATACGATTTTTATTAAAACTGTGTTCAGTACAGACTGACAGGTACACACATTCACTAATTA	.........(((.(((((((((((..((((.((((.........((((((..((((......))))))))))..(((((.(((((((((((.........)))))))))(((.((((((...(((..((((((....))))))..)))....)))))).))).((((............))))........)))))))...........(((((.((....(((((((.........)))))))...)).)))))..)))).))))))))))))))).))).........	-79.7	-	B1-m0011-3p	141	-	141	-	CAGACTGACAGGTACACACAT
	novel_mir_171	Chr11:19402805:19402951:-	CTCTATCTATAAGTGGAATAGAATAACCCGGTTGAAGTGTAATGATCATATATTTTGTAATGCATTGTATGTCATTGATTCTTTCCCAATAAATGAAAACTTTTTCTGTAAATACTGCGTATTTGATTCCATTATCATATGATAATA	...(((((((.((((((((.(((((.(.((((.((((.(((((((.((((((...(((...))).))))))))))).)).))))..........((((....)))).......)))).)))))).))))))))...))).))))...	-23.2	B1-m0012-5p	-	35	35	-	AAGTGGAATAGAATAACCCGGT	-
	novel_mir_172	Chr11:22986815:22986904:-	CGGTGTCAGAGCTGGCGTTGTGTGAAGCGAGGTCTACGGTGACATCTTAGCCAACCTCCAGTTTCACTATGTCGTCGTAGCTGACCTCCA	.((.(((((...(((((..((((((((((((((....(((.........))).)))))..))))))).))..)))))...)))))..)).	-29.9	B1-m0013-5p	-	7	7	-	GCTGGCGTTGTGTGAAGCGAG	-
	novel_mir_173	Chr11:24349528:24349608:-	ATTCTTTCTGAGGCGTTTTTGGGAAATCGCCTTCTAGGTAGATAGCTTTGCAGGCATTTTCTAGAAGCGTACATGAGGACT	..(((((.((..(((((((((((((((.((((.(.((((.....)))).).))))))))))))))))))).)).)))))..	-29.1	-	B1-m0014-3p	13	-	12	-	CAGGCATTTTCTAGAAGCGTA
	novel_mir_12	Chr11:24920007:24920082:-	AAGCATGATCAATGGGATTGAGGGGTACCAGGAAAGAACACCTTCCTAGATTTCTCAGAACGGTTGTTGTTCTGCT	.((((.(((((((.(..(((((((((.(.(((((........))))).))))))))))..).))))..))).))))	-22.2	-	B1-m0015-3p	340	-	338	-	CTAGATTTCTCAGAACGGTTG
	novel_mir_174	Chr11:25080561:25080790:-	ATTATTAATTCTTTTACTATCATTTGATTCATTGTTAAATATAATTTTATGTATACATATAGTTTTACATATTTCACAAAAGTTTTTGAATAAGACGAATGGTCAAATATGTTTAATAAAGTTAACGGCGTCAAAGGGAAGGAGGGAGTATATTTTTTCTTTCTTTTCTCTTTCTTTTTTTTTTGTCTGGTAGTCACAATGTTGCAGTCGATAGTGGAAGACAGTGTGAA	.((((....((((((((((((..(((...((((((.......((((.((((....)))).))))..((((((((.((....(((((.....))))).....)).))))))))..............((((..((((((((((((((((...................))))))))))))))))))))........))))))...)))..))))))))))))....)))).	-46.5	-	B1-m0016-3p	10	-	10	-	TGTTGCAGTCGATAGTGGAAG
	novel_mir_13	Chr12:2441355:2441614:+	GCCCGCGGCGGTGGGGCGGCGGTGGTGGCGGCGAAGGTGATGGACAGGAAGGAGCTGGCCGGGAGGAACAAGGAAGGGCGGGCGAGAACCGAGAGGGAGATCCTCGAGGCCGTCGACCACCCCTTCCTCCCGCGCCTCTACGGCGTGGCCGAGGGGGATCGCTGGTCCTGCCTCCTCACCGAGTTCTGCCCCGGCGGCGACCTCCACGTCCTCCGCCAGCGGCAGCCGCACCGCCGCTTCACCGAGTCCGCCGTCAGGTA	(((.((((((((((((((((((((.(((((.((..((((..((((.(((.(..((((.(((((.(((((.((((((((..(((((...((..((((.....))))..))...))).))..)))))))).(((((((.....)))))))..((((((((((...)))))).))))........)))))..)))))))))..).)))..))))..))))..)).).)))))))))))))))))))......)))))..))).	-149.5	B1-m0017-5p	-	12	12	-	GTGGGGCGGCGGTGGTGGCGG	-
	novel_mir_175	Chr12:8242530:8242646:+	TAGAATGATGGACCGGTTGATGAAATGGTGCACTTCATGGAGATCAAGTAAAGTCCCAGATAGGTCATCTGTCCTCAAGATCAAGGTGCAGTGTTATCGGACCAGTACATCAAGGTG	.....(((((.((.(((((((((...(.(((((((..(((.(((........))))))(((((.....)))))..........))))))).).))))).)))).)).))))).....	-30.5	-	B1-m0018-3p	21	-	21	-	TGCAGTGTTATCGGACCAGTA
	novel_mir_123	Chr12:9434249:9434520:+	CGAGCACGCGGTCGCGAGGAATCCTGCCGGGCTTCTTTTCCTCTCAAGTCAACGACGCGCGTCACACCACACGTCTAGGTAGACGTTTGTCCATGAACGATCGCGAGGCCCCGCCGCGACCGCCCGCGGCAGCGATCATCGGACGGCGCCGAGGGGCACACGGAAGGATCGGATGGTCCATGCGCGCGCTGGCAGCCTACGCAAGTAACGCAACCCGTGCGACTGCCGGCCGCGTCGCCGCGAGGAGATCAGGAGGCAGGAGCGCGTGCGTT	...(((((((.((.....)).(((((((...(((..(((((((.(...(((..((((.(((((..(((.........))).))))).))))..)))....(((.(..(((((.(.(((.((((((((....)))......)).)))))).).))))).).)))..(((((....)))))..((((((((((((((..(((....))).((((.....)))).))))))).)))).))).).)))))))..))).))))))).)))))))...	-112.5	-	B1-m0019-3p	7	-	7	-	GAGGAGATCAGGAGGCAGGAG
	novel_mir_176	Chr12:14164985:14165106:+	CTCTCGGTAACTTTACGATTTCCTGGAGCTGCTTCTTCTTTTCCCAGTGCCTCTCATTCTTATGGTACGCGTTCTTTTTCCAGCCGCTTCCAATGGAAAGTTTAGGGTATTTGTTTGAGTGA	(.(((((..((((((...(((((((((((.(((.............(((((............))))).............))).)).))))..)))))...))))))......))))).).	-26.9	B1-m0020-5p	-	6	6	-	CTTTACGATTTCCTGGAGCTG	-
	novel_mir_177	Chr12:14602106:14602225:+	ATTCATATAGAGATGGATCTAGTCAATACGGTCACCTTATTGCAATTTCGGTTCGAAATTTCGGACCCCACCAGGAAATCAATATATCGACTGAAATTGTTGGGTCTTCTCCATTTTTTG	.........((((.((((((((.((((.(((((....(((((..((((((((((((....))))))).......))))))))))....)))))..)))))))))))))))).........	-32.6	-	B1-m0021-3p	8	-	8	-	ACTGAAATTGTTGGGTCTTCT
	novel_mir_15	Chr12:15176235:15176307:+	TGCCATGGAACCTGCCTGATTCCTGTGCTGTATTGAATAAAAAGTTAGTAGAGGCTTGCAGGTGGAAATGGCG	.(((((...((((((..(...(((.(((((.(((........)))))))).))))..))))))....))))).	-26.5	-	B1-m0022-3p	52	-	51	-	AGTTAGTAGAGGCTTGCAGGT
	novel_mir_178	Chr12:15215648:15215792:+	CATCAGGAGCGGATTCTGTCGCAAAAGGTGTGGAAGCTGGCTAAGCAGGCGCCAATTGACCAGTGTGATGATCGCGCCTTGCTGGACATGCAGCCTGACCGCTACTAGGCATCTCATCTTTCGACTAAGTTGAAATTCCGTCCCA	.....((.(((((....((((..(((((((.(((.((((((....(((((..((..((.(((((((((...)))).....))))).))))..)))))...)))....))).))))))))))))))...........))))).)).	-42.2	B1-m0023-5p	B1-m0023-3p	21	14	7	GCAAAAGGTGTGGAAGCTGGC	CTAGGCATCTCATCTTTCGAC
	novel_mir_16	Chr12:15283679:15283799:+	AGCGTACAGTAGATGTGACTGTGTATTGCATGGTGGTTGGATTGGGAAGCATCAGGAGCTCTTATGGATGTCACCTTCCCTCCAAACCAATCCAGAGATCGCGGACAGGTTGCCATGTTGC	.(((.(((...(((.((.(((((.(((...(((((((((((..(((((((((((((....)))...))))....))))))))).)))))..)))..)))))))).)).)))....))))))	-36.5	-	B1-m0024-3p	468	-	466	-	TCCAGAGATCGCGGACAGGTT
	novel_mir_18	Chr12:17949899:17949979:+	GTCGTCGTCGAACCATCGCGTCGCGTCCCCGTGTCTGTCGAGCGAGATGGATGGATGGATGGATGGATGGGACCGGACGAG	.(((((......(((((.((((.(((((...((((((((......))))))))...)))))))))))))).....))))).	-34.8	-	B1-m0025-3p	8	-	8	-	ATGGATGGATGGATGGATGGG
	novel_mir_20	Chr12:18190759:18190899:+	TACATGTGTAGATCTAATGATGCGTTCATGCTAGTTTTCATCTGTAATGTCATGATTTATTTATGGAATAGATTAAATCATTATATGTCTATAATCTCAACACTTTGTTCCAGCTAGCAGAACTATCGCGTTCCACATGAA	..((((((..((.(...(((((.((((.((((((((......(((((((...((((((((((...))))))))))...))))))).............((((...))))..))))))))))))))))).).))))))))..	-31.8	-	B1-m0026-3p	205	-	205	-	CAGCTAGCAGAACTATCGCGT
	novel_mir_21	Chr12:18292723:18292803:+	TGATCTGGCACAAGGCAACCTGTGGAGGGCACAATATGTATTTCCAAAACATGTATTCTAGAGTTTGTCATGGCCAGCAAC	....(((((.((.(((((.((.(((((.(((.....((......)).....))).))))).)).))))).)))))))....	-23.9	B1-m0027-5p	-	410	410	-	CAAGGCAACCTGTGGAGGGCA	-
	novel_mir_22	Chr12:18850025:18850182:+	AGAAGCTACTCGAGAAGTTGGACATTGGCACTCTGGGTCAAGTTGTGTGTACTCTATTTCACTATTAATTTGTTTTTTCTACTTTTTCTTTCATCCTTATGTGTGTACTGGATCTTTTGATTGATGCCATGACTTGCTTTTCCAAGATAATGGTTAAA	...(((((.(((((((((.((.(((.((((...(.(((((((......((((.(................................................).)))).......))))))).)))))))).)).)))))))...))...)))))...	-22.7	B1-m0028-5p	-	24	24	-	CGAGAAGTTGGACATTGGCAC	-
	novel_mir_23	Chr12:21175348:21175422:+	ATGCATGGCTGTTGGTTTAGGAGGCATCAGGAGTTCTCATTTGACTTGATCGTTCTGACCCTCACCAAAAGTGCA	.(((((((.((..((((.((((.(.((((((...((......))))))))).))))))))..)))))....))))	-21.1	-	B1-m0029-3p	17	-	16	-	CTTGATCGTTCTGACCCTCAC
	novel_mir_24	Chr12:21724366:21724570:+	GAAACACTTGTACAGTATAAAGATGGTGCATCCTCATGTTTCTGTCAAACACAACACTACTGATATTCTCAAATTCATCACCATAGACGATGCATGTTGTAGGCTTGGTAGGCAGCAGGAATACCAAATCCTGCTCCATCTACTCTCTCAGTGTGCCTTTATTTACATAGGAATATTAGGAGTGTGCCATATCATACGGTTGTTT	.(((((.....((.((((....((((((((((((.((((((((((.........(((.(((((...((((((..(((((.........)))).)..))).)))...((((((.(((((((........)))))))...))))))...))))))))...........)))))))))).)))).))))))))...)))).)))))))	-51.1	-	B1-m0030-3p	27	-	27	-	ATTAGGAGTGTGCCATATCAT
	novel_mir_179	Chr12:21802879:21802962:+	CAATCTGCTGTATTCAAGAGCTCGTGCAGACGTCTAGGATTGTTAGTTCTGCATGACCTGCTTGGCTGTTCTTAGGAGAGATGT	((.(((.(((((.(((((((.(((((((((...((((.....)))).))))))))).)).))))).))....))).)))..)).	-24	B1-m0031-5p	-	7	6	-	TATTCAAGAGCTCGTGCAGAC	-
	novel_mir_180	Chr12:24256947:24257293:+	GTTGGAAGAACTGAGGAAGAATGAAGATGTGAATGGAATGTTATGCAGACACATGTGAATGGCATCTTAAAAGTTGCTGCTGAGTTTTTAGCACTAAGTTGTATGGTCGAAGACCTTAGACTGTTGGGCTGTTGTCGGTCGGCAAACAGTTGTTTTCTGTTTTCTTTTCTCCTCTGTTGGTTGTGAGCACCTGGGGGAGTTCTCCTCCCTGCAGGTAGTAAGACTTTTTTTTTTTGTAGTAGTAGTGCCACATTTCTTTAATAGAAATGGAGGGTAGATGCAACTCTTGATTTGATGCTATAGCAACCAGTTTCTGCATTTTGCATGGCTTCTTCAGGGTAGCCACT	..(((..(..(((((((((.((((((((((((((((..((((.....))))..(((..((((((((((((.((((((((((((.(...((((.(((((((....((((...))))...))))..))))))).....).))))))(((((.......))))).(((.((((((((((((((.((((.(((((((((((((.....)))))).))))((.((..((...........))..)).)).))))))).....))))))))...)))))).))).)))))).))))...)))))))).))).)))..))).))))))).)))..)))))))))..)..)))..	-101.5	B1-m0032-5p	-	8	8	-	CTGAGGAAGAATGAAGATGTG	-
	novel_mir_26	Chr12:24317796:24317931:+	TTGCAGTTCTTCGCCGGGAATTTCACAAGTATTCTACATGACATATCGTCTTCAAGATTTTGAAAGTGGCGTTTGGCCTAGGAGGCATCAGGACTTCTCATGTCAGAGGATGTAGTCGTGTAGGTGCTGACTGCCA	..((((((.(((.....))).......(((((.((((((((((((((.(((((((....)))))...(((.....))).....(((((.((.....)).))))).)).))))).))))))))))))))))))))..	-39.5	-	B1-m0033-3p	54	-	54	-	GAGGATGTAGTCGTGTAGGTG
	novel_mir_181	Chr12:24828195:24828276:+	AATGTTTCAGGTGGGTGTGACAGGCTAACAGCCCAGAAATGATTTTTCTCTGTGTGTGTGATTTGTCATTTGCCTGAACAAA	..((((.((((((((((.((((.((..((((...(((((.....)))))))))..)).)).))...))))))))))))))..	-24.9	B1-m0034-5p	-	7	7	-	GTGGGTGTGACAGGCTAACAG	-
	novel_mir_27	Chr12:24867698:24867939:+	CAATTCTCTGATTGCATCTGAATACTACTACATTTTGAATTCAGAGAAGAGGGATGATAACATCCTGGTGCCTCCTAAGCCTACCATAGCAACCCACTGGCTTGGTCCTCGTAGCCTTTTGTTTCTCTCCACCATTTTGTAGCGCTTGGGCTCACTCATCTCATCTTTTATGGAGCGAAAACCGCAGCATGTACAATACCATATATGAATGCATAGTATAATTCAATGCAGTATATGAATGC	..((((....(((((((.(((((..(((((..(((((..((((.(((((((((((((..........(((...(((((((((((...(((((......((((..(....)..))))..)))))...............)))).)))))))..)))))))))).)))))).)))).)))))...(((.((((((........))))))..))).)))))..))))))))))))....))))..	-58.1	B1-m0035-5p	-	58	58	-	ATTGCATCTGAATACTACTAC	-
	novel_mir_182	Chr12:3133656:3133769:-	CTATTCTTTGCTAGTTGAAGGCAGTACAGAGGCTAACTATTTCAACAATTGCAGCTAAACTACTGCATGCATGCTTTATTTTCTGGGCTGCTCTTTGGGTTGTTTGATGAATTT	..((((...((.(.(((((((((((.((((((.(((......((.....(((((........)))))))......))).)))))).))))).)))))).).)).....))))..	-23.6	B1-m0036-5p	-	10	10	-	CTAGTTGAAGGCAGTACAGAG	-
	novel_mir_183	Chr12:7558830:7558936:-	AATGGCTATTGTTCACCTGATGATGTGGCTCATCCTAGTAGCATTTTGAAATTTACTTTTCACTAGGTAAGATGTGTGAAACACATGCACACGGCGAGCAACACATA	.(((....((((((.((((.(((((((..((((((((((........((((......))))))))))........))))..))))).)))).)).))))))..))).	-26.3	-	B1-m0037-3p	8	-	8	-	TGAAACACATGCACACGGCGA
	novel_mir_184	Chr12:8109726:8110029:-	CAAGATGCTTCAAGCTCTCATTCACTGACGAGATTGTGTTCTTCTGACGCCGCTCATTTCCAATGCAATCACCATGCATATATATTGTCCCATGGTTGATCATCTATCACCGTTACATATAAAATTTAATTCCATCCTATAGTAGATGAAGATAACATAGAAATTATATACAGTTTGGATCAAAAGTTGAGAGAAAGAGAAGAAAGCTAAAAGATATGAGGAGGGAGCTAGGTTGTATTAGAGTATGAGGGTTTATTATATTATGAGCATCAGTGACATATGGAGGCTTTTTAAAGCAGTCCCA	...(((((((.(((((.(((((((((((.......(((((.....)))))..((((((((.(((((((((.(((.((.((((((...((.....((((.((((((((..................................))))))))...))))...))...))))))..)).))).((((...))))..............((((.................)))).))))))))).))).))))).((((((......)))))).)))))))...)))).)))))....))))).))...	-56.77	B1-m0038-5p	-	6	6	-	CAAGCTCTCATTCACTGACGA	-
	novel_mir_185	Chr12:8153975:8154044:-	GATTATGTCATTACAACCATGAGTCCTTATCAGGACCTTGCCATGGACTGATGGTTGTAACGACATGAAT	..(((((((.((((((((((.(((((....(((....)))....))))).)))))))))).)))))))..	-32.1	-	B1-m0039-3p	9	-	9	-	GCCATGGACTGATGGTTGTAA
	novel_mir_29	Chr12:8154206:8154517:-	AGTAGTTTCCGAAAGCCTCTTGAATAACTTTTTTTACCATCTGTCAAATTCAGTGGCGAAGATTCATTCACTATCTTTTATCTTTTTAAAATCTGTAGTTTGTGATAAATTTGATATTAAATTTATAATACTGTGATGCATCATCTTAAATCTATATTTTTGTGATAATTTGATTAATATACCTATAGTTTTATGAAATTTACTTAAAACAAAGAAACAACCATCAGTGTCTGCTTGGAAGGCCTGTTTTGGACCTAAAATCAACGTACATGACAGCCCCAGAAATTGTTCAAGTTGGGCTGAAGAACGTTG	....((((.....((((((((((((((.(((((...(((.(((.......))))))((((...((((..(((((.(((((......)))))...)))))..))))....))))........(((((((.((((((..........((((((.((((....))))...))))))..........)))))).))))))).....(((......)))......(((.(((...)))..)))..(((.((((.((.((...........)).)).)))))))..))))))))))))))..)))))...))))....	-53.3	-	B1-m0040-3p	52	-	52	-	GAAATTGTTCAAGTTGGGCTG
	novel_mir_186	Chr12:8173311:8173569:-	TAAATTATCATGGGTAGGGAGCTACACACCAATGTGATAAACCATGACATATGGGTCTTTTCCATGCCAACTACCATCAGCACATCTGGCGGATCAGTAATCCTCGGTTGAGCAGGCAGACATCTGACTGTTCTGAGATATCATTTTCCTGATCCCGCGCATTCCAATCAGACATTCATATTTCAATTGAAATGGAATTAAATGTGAAAAATACCCCCCTACAAATCACTTGTGTTTCTTCTTTGCCTACTACTACTTG	..........(((((((((((..(((((.....(((((...(((((...)))))((((.....((((..........(((.....)))(((((((((.((..((((...((((((.(((....))).))))))))))........)).))))).)))))))).......)))).(((((((((.((((.......)))))))))))))................))))).)))))..).))))))))))..........	-55.1	B1-m0041-5p	-	9	8	-	TGGGTAGGGAGCTACACACCA	-
	novel_mir_187	Chr12:14550813:14550905:-	AATGCTCGATGACCTTTATCCATATATATTGGGCTTGGAAGACACCGGAAATCTTTGATGCAAGGTGAGATATTGATAGGGGTCGAGATCAGG	..((.((..(((((((((((.((((.((((..((.(.(((((.........))))).).))..))))..)))).))))))))))).)).))..	-26.6	-	B1-m0042-3p	9	-	9	-	AGGTGAGATATTGATAGGGGT
	novel_mir_188	Chr12:14677420:14677680:-	CAGATCGTACCCGGAGTCGGACAATGCCGATTTGACCATTCACATGCCGCTAGTCAGATCGGGCCCACACCGTCGGTCCCATCGATTGTATGGTGGCAGTCAGACCGGCCTCATATGGAAAACCGGGTCTTTTCCAAATCTAGCCACGTTCGACTTCCTATCTTGGATGCCAAATTTTAGTGTTAATATTTTAGCTAGATCAGTTGATACATGGTGATCTTACATATAAAAAATATTGTCTGATCTCTCGGGTACACCGCA	......((((((((((((((((((((((((((((((................))))))))))(((...((((((((((.....))))).))))))))((((.(((.(((......(((((((.......)))))))......)))..))).))))(((......)))..............(((((....))))).((((((.(........).)))))).............)))))))))).))).)))))))......	-82.4	-	B1-m0043-3p	6	-	6	-	AAATATTGTCTGATCTCTCGG
	novel_mir_126	Chr12:14944199:14944386:-	CTGTGGTAATGCTAGATCGGCTGGTCAAACAGTGTGCAGGTGACAAGACTGTGCTACGACTGAGGACCATGCGGCAGTGTGGGGAATATCAATTGGGACAGAAGATACAATGAAGATGAGTAAAATTGACGTTTTGAAATTCTTCTCCTTCCAGAGGACTGATGGCTGGATTGGATTGGAAACTAAAT	..((..((((.((((.((((((((((...((((((((((((......))).))).)).))))....((((((....))))))..........((((((.((((((.....(.((((((...........)))))).)...))))))..))))))..))))...)))))).))))))))...)).....	-41.5	-	B1-m0044-3p	355	-	340	-	ACTGATGGCTGGATTGGATTG
	novel_mir_30	Chr12:15141388:15141495:-	CCTATGTAAGTATTCATTATCTGCAGTATGATCTAGCTTTATTTTTGCGAACTTGAGGAGTCCCCTAAAATAGCAATACATCTGCAGTATGAGGGGTAATTGCATAAG	..(((((((.(((((.((((((((((.(((.....(((..(((((.(.(.((((...)))).).).))))))))....))))))))).)))).))))).)))))))..	-25.6	-	B1-m0045-3p	16	-	15	-	ACATCTGCAGTATGAGGGGTA
	novel_mir_189	Chr12:15218166:15218237:-	CTAGCATGCTGTACGTCCGGCAGGATCATTCCATTGTGCTGATCGAATGATGCCCGGTTCGTCAGCTGTAAC	...(((.((((.(((.((((..(.(((((((.(((.....))).))))))).)))))..))))))))))...	-25.4	-	B1-m0046-3p	14	-	14	-	ATCGAATGATGCCCGGTTCGT
	novel_mir_31	Chr12:18102039:18102221:-	CAGCCTTGTGCCTAGGCTTCCATGTGGTTAGGGGTCGATAGTAGAGCTTCTGCTCACCATCCATGCCTGAAGAAGGGAACAGTGGACCTAGTCCAACAACCAATGTGGTTAATTTCCCCCACAAAATCTGTAAAAAGTGAAACTTTGTTGCAACTTTCATGGAAGATAGGCTCTCTTTGGCTT	.((((..(.(((((..((((((((.(((((((.((.(((.((.((((....)))))).))).)).)))))....(((((...(((((...)))))..(((((...)))))...)))))..........((((((((((...))))).))))).))..)))))))).))))).).....)))).	-58.2	-	B1-m0047-3p	562	-	560	-	ACTTTCATGGAAGATAGGCTC
	novel_mir_190	Chr12:21894054:21894146:-	GATACCTGGACAAATGAAGCCTGTAATTTGTAGAAGATGGTCAATTGATTCCCTTAATCTCTCGAATCTGCGTGTTGTATTTCTCCTGGTACC	..((((.(((.(((((.(((.(((((((((.(((.(((((((....))))......))))))))))).)))).))).))))).))).))))..	-20.8	B1-m0048-5p	-	8	7	-	CAAATGAAGCCTGTAATTTGT	-
	novel_mir_191	Chr12:21913511:21913688:-	TCTTCACGTACGGGCAGTAACAGGATATCGAAGATCACCTTGTACCATCTCTGACTCATTGTGGGTGGGAGGAGTATCAGTATTCCCAATGCCTTCCACTTCTATTTCTTATCGCGCATACTTGAAAATAAAAACCTCTTGAACTTTGATGGTGTTGTCCATTGCTTGCAAAAATATC	..........((((((((.((((.(((((((((.(((....((((..(((((.(((((...))))).))))).))))..(((((...)))))............((((...............))))............))).))))))).)).))))..))))))))..........	-34.4	B1-m0049-5p	-	10	10	-	CGGGCAGTAACAGGATATCGA	-
	novel_mir_192	Chr12:21924269:21924420:-	ATATGAGTGCCTCGAAAAGGGATTATCTGACTTAGCTATTGTGCAGTTGAGTCACTGACATGTGGATTATAGCAAAGTGGGATTCATATTCATATGACTGTGACTCAATTGCATGTGTAGTTAAGTCAGAGAATCCTGTCAGGCATTTCCCT	....((((((((.((...((((((.((((((((((((((.(((((((((((((((.(.(((((((((....................))))))))).).)))))))))))))))..)))))))))))))).)))))).))))))))))....	-71.3	B1-m0050-5p	-	11	10	-	CTCGAAAAGGGATTATCTGAC	-
	novel_mir_193	Chr12:24413893:24414003:-	GGTCTGTTCTCTGTTTTTGAAGTGTAGTTGAGTTAGTGAAAGAAAATGAGTTGTATTTCTTTGGATGCAAGGCGTTATAAACTCTGGCTTTCAGGAACAGAGTTCAGAGTG	(.((((..((((((((((((((.((....(((((.(((.......(((..((((((((....))))))))..)))))).)))))..))))))))))))))))..)))).).	-35.4	B1-m0051-5p	B1-m0051-3p	10	6	4	CTGTTTTTGAAGTGTAGTTGA	TGGCTTTCAGGAACAGAG
	novel_mir_42	Chr12:24620003:24620266:-	GCCTTCGCTGCGACGGCGATGAATAAGCGGCTCAGGCCAGAGCCGCCGCGAATCCGTTGAGGAAGCTAGCACCACCAGGGACACACAATTTTTAGTCAGATGTCTAGGGGGCGCTTGGTTTGGATCTTCTCCTTTTCCCCTTCTTTTTTTCTCCCTTTTTTTGACATAAGTTTCCAAAATATTTATTAGGTTCTTTGAGCCATTGCCATTGGTTGGCATTTGGCAAATGTTGTTGGATTGGATTGGTTTGGTTTGTGAGAAGGA	..(.((((((...)))))).).....(((((((......)))))))......(((.((..(.(((((((.((((((((...((.(((((.(((.((((((((((.((((((.....((...(((...........)))....))......)))))).........((((((.........))))))..(((((...)))))...(((...))).))))))))))))).)))))))..))))..))))))))))).)..)).)))	-71.8	-	B1-m0052-3p	7	-	7	-	TGGATTGGATTGGTTTGGTTT
	novel_mir_194	Chr1:2278803:2279128:+	ACATCAAGATGCTATTGTGCACGCAATGAAAAGTTTGGTATCAACTCTTGAGATGCTGAACTTTCTCAGCTTATCTGCTACTCTGAATGTCAGATTATTTTGCCTGGGAATGGAATAATAGGAGGGAACAACAACATCTGAATATCTTCAGAAACTTGAGTCGTCTGTATCAGTGCATGAACTTTGATGTCCATATGATGCTGTGACAGGCTATCTTTCATACTAACCAGTATGTATCTGAGATTTTGGTTGTTTAAATAAGATCATATATAAATGTTTTGGTTGAAAACCAACAAGGTCGTTGTAGTATAGTGGTGAGTATTCCC	.........(((((((((((..((((((((((((((((((((.........)))))))))))))...(((......))).....((((.((((((..((((.((((............)))).)))).........((((((....)))))).....(((..((((((..(((((((((.((......))...)))).)))))..))))))...))).((((((....)))))).)))))).))))(((((.(((((.(((((.(((......)))))))).))))))))))......))))))).))))))))))).........	-78.6	-	B1-m0053-3p	13	-	13	-	AAGGTCGTTGTAGTATAGTGGT
	novel_mir_195	Chr1:2331841:2331923:+	ATGGTGCGGAGTATGAGTTTTGTTCCTTCATAATTTTCTCATCTTTGAGTGGCTTATGCTAGAACGGGGGCATCTCCTGCCGA	.(((((.((((.(((..((((((((...(((((.((.((((....)))).)).)))))...)))))))).)))))))))))).	-25.3	-	B1-m0054-3p	20	-	20	-	CTTATGCTAGAACGGGGGCAT
	novel_mir_196	Chr1:2347861:2348034:+	TTGCCGTTTCTTTTACTTGCATATGTTTTGCATCACCATACAAGATATGTTTTATGTGCATATCATAGTGGGCTTGGGAGGGGTCGAGAATGAATTCAGACAGTGGAGGCGGTTCAGCATCAAATTATTATGCACATGTGCACAAAACATATGCCTAGGTTTCAGAAATAAACA	.....((((((...((((((((((((((((.................(((..((((((((((((((..(.(((((.....))))).)..)))).((((.....)))).((......))..........)))))))))).)))))))))))))))..))))...)))))).....	-42.3	-	B1-m0055-3p	7	-	6	-	AAAACATATGCCTAGGTTTCA
	novel_mir_197	Chr1:6223532:6223746:+	CTCCACGACCCCGAGTGTGGGACGCGGCGGGGGGCTGTGGCTGCGCCGTGAACTGATGCAGGTGGTGGTGGTGGCCGACGCCACCGAAGGAGAGGAGCTGAGGCTGGAAGCCGTGTTGGTGGTGGTGGGAGTGGCCGCCGGCGTCGCCCATGGGCGAGAGAAGGGCATACTCGGCGGAGGAGCCCGACAGCTGCCTCACGGACGCCGGCTGGAGG	((((((.(((((..((((.((.(((((((.((........)).)))))))..)).)))).)).))).))((((((....))))))...)))).....((..((((((...(((((..((((((.((.((.((..(((((((.((.((((.............))))..)))))))))....)))).)).)))))).)))))...))))))..)).	-102.7	B1-m0056-5p	-	6	5	-	CCGAGTGTGGGACGCGGCGGG	-
	novel_mir_198	Chr1:11352760:11352993:+	TTAACTTTTTAAGTCCTTTTTCACCATAAAATACCTTAGCTTTTAAAATGGTCCAGTAACATGATCCTTATGGTGACGTTATACTCTACTGTATTCAACAAAATGTACTTCTTAGGAGTCTGTATCAATGATAATCACAATCGTACTGTACCACTCAATACAACCATAAAGATGTTATTGTACCATTTTAAAAGGTAAAGAGATTTTACGGCGAATAAGGACTTAAAAAAGTTA	.(((((((((((((((((.(((.((.((((((..((((.(((((((((((((.((((((((...((.(((((((.(((((((((......)))).......))))).........((((..((((..(((((.......)))))...)))).))))......))))))).)))))))))).))))))))))))).).)))..)))))).)).))).)))))))).)))))))))	-69	-	B1-m0057-3p	9	-	8	-	TTTTACGGCGAATAAGGACTT
	novel_mir_199	Chr1:32852694:32853022:+	AGGGAGTGTTGTGGCGATCTGGATCCATCCAACATGGACTTTGTTTGGATAATCGAGTTGGAATAGTAATAACAAAAAAGGGGGGAAATAAACTATATAATATTGGTCAACTCGAACTGTTCTGCGGAATCTCTTTGGCCGAAATTAGAGTTTTGGAGTTGGTTTCGGTTTGATGATTCGCGATTAAGAAATCTGGATTTTGCGTCTGTAATGTAATCACATCATCTCTCACGAGGATTCAAATCAGTAGTGACTGCAACTTTAACAGTATCCATCATCCAACCATCGAGTACATAAGGGATGGTCTAGATTCGTTGCTTAATTTCCCC	.(((((....(((((((((((((.((((((...(((.((((((.((((((..(((((((((..(((((................................))))).)))))))))((((((..(((.((((((...((((((((((((..........)))))))))))).)).)))))))((((....))))((((((((.(((..(..(((.........)))..)..)))))))))))...((((....)))).......)))))).......)))))).))..)))).)))...)))))))))))).))))))).....))))).	-87.24	-	B1-m0058-3p	8	-	8	-	AGGGATGGTCTAGATTCGTTGCT
	novel_mir_200	Chr1:34222147:34222290:+	ACATAAGCTTCTCAGTTGACCATGTCGATCGGCGGCTGCATTTCTTTTACTGCGGGCTCTGGGGATGGGATGTATCAGGAGCTGGAGAGACACAGGCCGACTGGTTCACTCGCCGGTCGGTGGCCGCAATTGAGACGACAGATT	.......(.(((((((((.((((..((((((((..(((((..........)))))(((((...((((.....)))).)))))..(((.((..(((.....)))..)).)))))))))))))))...))))))))).).......	-48.3	-	B1-m0059-3p	6	-	5	-	CGGTCGGTGGCCGCAATTGAG
	novel_mir_36	Chr1:34261987:34262054:+	CTTTTACGCTCCAATTGGGTTCGATCGTGTGAGTGTACCCGCGAATCAAGCGGATAGGAGTAAAAAGA	(((((..(((((.(((.(.((.(((((((.(......).)))).))))).).))).))))).))))).	-19.8	B1-m0060-5p	-	194	194	-	CCAATTGGGTTCGATCGTGTG	-
	novel_mir_37	Chr1:1178978:1179253:-	ACCGCGCACGTCTCCGGCGATCTACAGGTATCGTCGCCACCTCCTAGCCCCCGGTCTCTCATCATACGGTGGCTTCCCCCCGTGGTGGATTCCTCGGTCGGTTCCGATCTGTTCGGGAGGTGGGGGTGGGGGGTCGTTGTTCTGTAGGTTATGGAGCGTTGGTGGTGTTGTTTTTTGTGGGTGGTTCGAGGTGAATCGGTGGGTTGATTCCTGATTTTGCTGTTTGTTTTGGCTGTGATGAAGGTGTAGATCGCTTCCGGAGACATCCAACCGCGG	.(((((...(((((((((((((((((....(((((((((((((..((((((((......((((((((((.((.....)))))))...(((((((((.((..((((((.....)))))).....)).)))))))))..(((((((((...)))))))))....)))))..........)))).)))).))))))((((((.((......))))))))..((((.......)))).)))))))...))))))))))...))))))).......)))))	-102.4	-	B1-m0061-3p	19	-	19	-	TGTAGATCGCTTCCGGAGACAT
	novel_mir_38	Chr1:3147765:3147838:-	GGTGCAGAATAAAGACAACAAGATTAGGGGGTGATTGTTAGACTTAATCTTGTCGTTTGTGTTTTTTTTCATCC	((((.((((.(((.((((((((((((((..............)))))))))))....))).))).)))))))).	-18.8	B1-m0062-5p	-	10	10	-	AAAGACAACAAGATTAGGGGG	-
	novel_mir_201	Chr1:19145105:19145339:-	TGGAGGGCCTCATTTTCTCATCGGCTAGTCAGGGGAATATAGAGGTAATGTGCTGCATGACATGCTGAGCAAGCAGCGTTCTCCATGTACCGTGCCTTTTGATATCTTCAGCGCAACGCGCCCGTGGTGAACAATGCATCTACTTGCTTCGTGTCTTGCTTCGTGGTTCTAACTGATCTCGACTGGCTGAATGGAGGTTGCATTGCATCAGCGAATCACATCTGGGTGCCTGCAT	((.(((((((((.(((((..((((((((((.(((.....(((((.((.((....(((.((((((..(((((((((..((((.(((((..((((((...((((.....)))).)).))).)..))))).))))..)))......)))))))))))).)))..)))).))))).....))).))))))))))..))))).))..((((....)))).........)))).))).)).	-75.4	B1-m0063-5p	B1-m0063-3p	100	33	66	CATTTTCTCATCGGCTAGTCA	ACTGGCTGAATGGAGGTTGCA
	novel_mir_202	Chr1:23765736:23766099:-	AAAGCGTTTTTATCCGGTGCAACGCAGTAGCTATTTTCTAGCCGATTATAGAAATCTTTCACGTAACCACGTTTTGGGTTGGTGGCAGTGACGTAACAACACACGCATGTTTGAACAGTGGGCCAACGGATCTACGGTGCCATGGTGGGCTCGATATTAATTAGCCCACGTACTGTCTCCATTCTCTAGATGCAGCCCATAGCCCAGAGGAACATTTATACAACCGAGATAACAGGGAACTGTCTAGGCATCTTTCGTGTGATTTTTGAGAAAAATTCTCCCCTTATATTTACATCCAACCATAAATAAAAAGTACAGAGAAACCGTTCAGATAGCTTGTGATTGTATTGGTTACTAGAGTAGT	...((.((..((.(((((((((((((..((((((((((((........))))).(((((...(((.....((((..((((((((..((((.........((((((.(((((((.(((((...((...(((...(((((((....(((((((.(((....))))))))))))))))).))).((((((....((........))..)))))).......................))..))))).)))))))....))))))......(((((...)))))......))))..)).))))))..))))......)))))))).........))))))))))).))))))))).))..)).))...	-86.7	-	B1-m0064-3p	8	-	8	-	ATAGCTTGTGATTGTATTGGTTA
	novel_mir_203	Chr1:34204211:34204381:-	ACAAACAAAGTATTGGGAACCTCCGCTTGTATAGTTTGTGCCACTGTTGCTTGTTGTTCCTTGGAATGGGAGAATAGAGCTGGGAATTTCTCTTGCAGCGGCATTTTTAAGCCATCTATCTTTCCAAAAGCTGGTTCTGATGCAAACTATGCTGGCGTGGACCATGTTTAC	..(((((......(((...((..((((.(((((((((((((((((.(((.(((((.((((.......)))).))))).((((.((.......)).))))(((........)))...........))).)).))))......))))))))))).)))).)).))))))))..	-45.5	-	B1-m0065-3p	7	-	6	-	TGCAAACTATGCTGGCGTGGA
	novel_mir_204	Chr1:34224784:34224872:-	TAATATATGTCCGGTTCCAAATGTTCCATCATGCATAGGCTGATAGCTTATACAAGCCCGTGACATATATTGGAACCGGAGATGTTTAC	....((((.(((((((((((.(((....(((((....((((..((.....))..)))))))))...)))))))))))))).))))....	-31.7	-	B1-m0066-3p	13	-	13	-	CGTGACATATATTGGAACCGG
	novel_mir_205	Chr2:1522642:1522841:+	CACAGAAGTGTGCAAGGTCAGCATGCAAAAGGCCAATATATTCAAGGTTTCAAAGCATGCATGTACATGGCTCAAAAACATTTGTGATTTGGGTTGGGCTTAGGGGGCATGGGGAATTCAATGTATACGTTCCATATTGATCTAGTTTCCACCTCATCGTAGCGATGGGCCTTTGCTTGTATGCGGCTTCCAGCTAGTGT	.(((..(((.....(((((.((((((((((((((..........((((.......(((((........(((((((...((.........))..)))))))......)))))(((((((((((((.........)))))))....))))))))))(((((...)))))))))))...)))))))))))))...)))..)))	-53.1	-	B1-m0067-3p	6	-	5	-	CCTTTGCTTGTATGCGGCTTC
	novel_mir_42	Chr2:5209900:5210119:+	CATCAAATGGGTTCAGGAGTCGTTTCCGACAGGCGGGGATTGCTCCGGGTTGGTGGTGATCTACGAGCAGTGCGTGCGTGCCTTCTGGCACGACGACCGCTACAAGAACGATCTCCGCTACCTCAAAGTGTGGCTGGAATATGTGAGTTTCATGAATTCAGGATTGGTTCTGAGGTGGATTGGTTGGATTGGATTGGATTGGTTTGGTTTCCTTTTGACA	.(((((((.((((((...(((...((((((...(((((....))))).(((.((((....)))).)))....(((.((((((....))))))))).(((((...(((((((((((((((((((...)).))))).))).....(((((((...))))))).)))).)))))..)))))....))))))...))))))))).)))))))............	-75.5	-	B1-m0068-3p	11	-	10	-	TGGATTGGATTGGTTTGGTTT
	novel_mir_206	Chr2:5493760:5493965:+	GGTGGTGGTTGGTGCGACGACGTCGGCGCCGGGTGCTATGCGAGAGACGGAGAGAGAATAGCCGAAAGGAGATGGGAGGAGTATGTGCGTGGGGTCCACAGTTGGCCAGTCATTTTTGGCTAGCCAAATTTGGCTAGTGAAGGGAGGGTTTTGGCCAGCCAGATGGCTTAGCCATCCGGTTAGAGAGGTTGTTGGAGGGTATTTTT	...((((.((....(((((((.((...(((((((((((.((.(....(((..(.....)..)))...(.(.(((.......))).).)((((...)))).(((((((((((.(((((.((((((((....)))))))).))))).))...)))))))))....).)).))).))))))))....)).)))))))..)).))))...	-70.6	-	B1-m0069-3p	9	-	9	-	ATCCGGTTAGAGAGGTTGTTGGA
	novel_mir_207	Chr2:10897494:10897580:+	AGTGGCGCCGCCCAGGCCCACGTCGGCGACGGCGTGGAGGTCGACCCTCAGCGCCACCGCGTCGGCTGGCCGGTGGCAGTAGTACAC	.(((((((((((..((((...(((((((..(((((.((((.....)))).)))))....))))))).)))))))))).))....)))	-44.5	-	B1-m0070-3p	15	-	15	-	CCGCGTCGGCTGGCCGGTGGC
	novel_mir_44	Chr2:13849040:13849383:+	GCCGCCTCTCCCGCCACCGGCGCCGCTTCCCTTCCCATCTCCCTCCCTTCTCGCCGGCTCGGCGCGGCAACGGCGGGGTTCGGCGGAGACGGCGCCGTCCCAACGGCGGCGACGACGGCGTTCGCGGTGGCCGCGCTCCCTCTTCCCCTCTCCTACCCGTCTCGCCGGCTTGGCGCAGCGACGGCGGGGTGCGGCGGAGACGGCGGTGACGGCCGTCCCTCCCCCTCTCTCTCTCCCCGTCGGCCTCGACGGCGACAGCGCCCTCCCAACGGCTGTGATGGCGTCGGCTTCATCCATGGGCGGATCCGGCGGCGGCGGCGGCGGTGGTGGTGGTGTCGGTGGCC	((((((....(((((((((.(((((((.((((.((.(((((((.....((((((((((((.((.((....)))).))).))))).))))((((((((((((((.(.((((((.(((((.((.(((((...)))))...................))))))))))))).))))).(((((...((.(((((((((.((.((((((.......)))))))).))...........((.((((((....)))))).))..))))))).))....)))))))))))))))...........))).))))..)).)).)).))))))).)))))))))....)))))).	-175.4	B1-m0071-5p	-	56	55	-	CCGCCACCGGCGCCGCTTCCC	-
	novel_mir_208	Chr2:16568797:16568950:+	TGATGTTTGGTTTATGAAGGAGAGTCTTGAAAGGCATTGGCCATAGGATTTGAATTGTACGTGAGTTGTTTGATATATTCTGGACATGGATTCAACTGAAGCAGTTGGGTGAAATCATAAAGTTCGGGGCCGGCTTTACATAATTTATACATAG	..((((.(((.(((((((((...((((((((.(((....))).((((((((((((...((....)).))))))...))))))((.....(((((((((...)))))))))....))......))))))))...)))).))))).))).))))..	-31.9	-	B1-m0072-3p	14	-	13	-	TCGGGGCCGGCTTTACATAAT
	novel_mir_209	Chr2:22852348:22852428:+	CTCCATGCCTTGCAGTTGTGTGTTGATCTTCGTTTCGAGTCCAGCGCATATGCAACAGAAATCTTGTCCAATGGCAGCCCC	.....(((((((((..(((((((((..(((......)))..)))))))))))))).................)))).....	-19.6	B1-m0073-5p	-	5	5	-	TGCAGTTGTGTGTTGATCTTC	-
	novel_mir_46	Chr2:27148134:27148282:+	GGGCTTATCAAAGGGGCGCTTACTGAGAGTTCTTTGGCATTCTGTCCACCTCCTTGTCGAATCCTCAGAGACAGAAATCTCATATCTGTTGATCTTGGAGGTGGGCATACTGCCAATGGAGCTGTGTAGGCCTCCCTTTGTAAAACCCA	(((.....((((((((.((((((....((((((((((((...(((((((((((..(((((.......((((......)))).......)))).)..)))))))))))...)))))).))))))..)))))).)))))))).....))).	-68.4	B1-m0074-5p	B1-m0074-3p	53	51	2	AAGGGGCGCTTACTGAGAGTTCT	AGCTGTGTAGGCCTCCCTTTG
	novel_mir_210	Chr2:10619769:10619888:-	CCATAAAGAGATTCAGGAGAGGGGCATTGTGTCCCTCGTGTCAGTAAAGGGTAGTCTCAGATGTAAGCTAACCGATCTGCATGACCAATATATATGCATCTCCTTTCATGATCACTATGA	.((((..((...(((.((((((((((((((((...(((((.(((....((.(((.((........))))).))...))))))))...))))).))))...))))))).)))))..)))).	-29.7	B1-m0075-5p	-	7	7	-	ATTCAGGAGAGGGGCATTGTG	-
	novel_mir_207	Chr2:10932229:10932315:-	AGTGGCGCCGCCCAGGCCCACGCCGGCGACGGCGTGGAGGTCGACCCTCAGCGCCACCGCGTCGGCTGGCCGGTGGCAGTAGTACAC	.(((((((((((..((((...(((((((..(((((.((((.....)))).)))))....))))))).)))))))))).))....)))	-47.2	-	B1-m0076-3p	15	-	15	-	CCGCGTCGGCTGGCCGGTGGC
	novel_mir_48	Chr2:20404010:20404112:-	AAAGCTGCGGATTTGCCTCCGGTCAGGTACGGAACAAATATAATGCGTGCAGACGGCGATGAGATGCGTGCCATACTTGATCGCGGCAAGGATACGCCTTACA	......(((..((((((..((((((((((.((.((..((...((.(((.......)))))...))..)).)).)))))))))).))))))....)))......	-30.3	-	B1-m0077-3p	187	-	184	-	ATACTTGATCGCGGCAAGGAT
	novel_mir_211	Chr2:20910121:20910189:-	TGGGTCACTCCCTGCCTCTAGGTCCTGGATCACCCTGCTCCTGAGACGTTGGAGGCAGCAGGCAACTTT	.((((..((..((((((((((((((.(((.((...)).))).).))).))))))))))..))..)))).	-25.5	-	B1-m0078-3p	7	-	7	-	TCCTGAGACGTTGGAGGCAGC
	novel_mir_212	Chr2:22560882:22561103:-	CTCGCTCATGTATATCTATTAGGTAATACTCACTTAAATTTAGGTATAGGTAGTCTCTTTGAAATATGTACGTGTATGAATATGTAATCTCTAATAGGAGGTGCTAATAAAGATAGGGTGTACGTGTATACGTTAATAGAGGTGAGTACTCATAGATGTATGATGTGCATAAATGCGTTAATAGAAAGAAGTGATCATATGGATATGGTGTACGTGTGCGTC	..(((.((((((((((((((..(((....((((((...((((..(((.((((.((((((.........(((((((....))))))).........)))))))))).)))........((((((((.((((((((.((.(((.......))))).))))))))))))))))...........))))...))))))...))).)))).)))))))))).)))..	-54.4	-	B1-m0079-3p	9	-	9	-	AGTGATCATATGGATATGGTGTA
	novel_mir_213	Chr2:34459772:34459915:-	CTTCGCTGGTGCCGGCGCCAATCCAGTGGATCACTGCATTTCTGCAATTCCCTTTTCACTACCCATTTTTAAGCAGGTAGTAATAGGATTAATTAGTAAGTATCAGCAGGGCGGATTCACAATGGGGGCGGAGGGGTCTCGAGA	.((((..(((.((..((((..(((((((((((.((((....((((((((.(((.((.((((((............)))))))).)))...)))).)).)).....))))....)))))))..))))))))..)).))).)))).	-38.4	-	B1-m0080-3p	19	-	18	-	CGGATTCACAATGGGGGCGGAGG
	novel_mir_214	Chr3:1468912:1469119:+	TTGGCTGACGTCCATTGTTGGATGTCGGAGCTACTTTTCGCTTTGGTGACTTTCGTGGCTTCAGTGTTGCTGCAGTTGTGGAGTCGGCGCTGCTAGGTCGCTTGGGCGGCTAGCTTAGCAATGGTAACACCTCTTCTGCAATGTGGGAGCTGTTGTGTCGCTTTTGTGTTTAGTTTGGCAGTGACGTCCTACGATTAGGCTCCGCCGT	.((((.((.(((.(((((.((((((((..((((((...(((...((((((......((((((..((((((.(.((..(((..((((..((((((((.((((....)))))))))..)))..))))..)))..)).).))))))..)))))).....))))))...)))...)))..)))..)))))))).)))))..))))).)))).	-75.4	B1-m0081-5p	-	13	13	-	TCCATTGTTGGATGTCGGAGC	-
	novel_mir_215	Chr3:18586963:18587042:+	TGTACCAACACAGCAAGTACAGGAGGAGCATGCCTCTGATCCTCTCGTGGCTCTTTCTGATTTAGCCTTGTATTGCTGCC	.(((.(((.(((((((((.((((((((((..((.............)).)))))))))))))).))..))).))).))).	-21.1	B1-m0082-5p	B1-m0082-3p	28	26	1	CAGCAAGTACAGGAGGAGCAT	GCTCTTTCTGATTTAGCCTTGTA
	novel_mir_216	Chr3:27564241:27564427:+	AATGCTTGATTGGTTGGATTTGCATACATGATTGATTACCTATTTATTGCATCTATCTGTGTACTACTTGTGTATTAAATTGGGGTTCACAAACAGTTAAATCACCGTAGAAACAATGGAATGTACTGTAGCAATTAATATTGTCCATCCAAATTTGATCTAACGGCTATAAATAGCTTATGGCATG	...........(((((((((((.(((((..(((((((..((((....(((((((((.(((...((((..(((.(((.(((((...........))))).)))))).))))..))))))).)))))..)))).)))))))..)))..)).))))))))))).....(((((((.....)))))))...	-37.3	B1-m0083-5p	-	7	7	-	TGGTTGGATTTGCATACATGA	-
	novel_mir_154	Chr3:29333218:29333471:+	AAGCTGCGACAAACTTTCCTGGTCGCGTCGGGGAGGAGCGGCGTCTATATTCTGAGAGCGTAAGGCTGCCGGTGAAGAGCCAATCCCAGTCTCCTGTCCTCTTCTCACTGCTCCACTTCCCTCCCGAGAGCTTCTTCCCCTCCCGGCTACCCTCAGTAGTCCTTCTCGATCTGGCCTGAAGGTCACCGGTGGCAATCCCCAGCCGCCAGATGCCACTCCTCCCCGACGCGACCAGGAAAGTTTGTCGCAGCTTT	((((((((((((((((((((((((((((((((((((((.(((((((.....(((((.......((..(((((.((((((.......(((....)))..)))))).....(((((...........).))))...........)))))..)))))))..(((......))).(((((....)))))..((((((........))))))))))))).)))))))))))))))))))))))))))))))))))))).	-134.6	B1-m0084-5p	B1-m0084-3p	148	146	1	AAACTTTCCTGGTCGCGTCGG	GACGCGACCAGGAAAGTTTGT
	novel_mir_49	Chr3:30263650:30263716:+	TACCTCCATCCTTTAATATATGACGTTGGTTTGTTCACCAACGTCCTACATTAAAAGAACAGAGGGA	..((((..((.((((((.((.(((((((((......))))))))).)).)))))).))...))))..	-22.8	B1-m0085-5p	-	21	21	-	CTTTAATATATGACGTTGGTT	-
	novel_mir_50	Chr3:32511910:32512120:+	ACCACATGCAAGTGCTATCATTTCACCTACATCGTTTATTAGCTACCAAAATAATTTTTTGAAAGAACTTTTATATATGTGTTCATAGCAATTTAAAAGCTAATGATGAAAAATAAATTACAGCAAAAAAATCAAAATTAACTCTTTAAGAAATATCGGAGCTGGTGAGAAGCAAAGAAAACAAATGTAGAGAGAATGGTCGTGCGATGGA	.(((..((((.(.(((((..((((..((((((..((((((((((.((...(((.(((((((((.((((............)))).((((.........)))).((((.......................))))..........)))))))))))).))))))))))))...............)))))).)))))))))).)))).))).	-32.5	-	B1-m0086-3p	204	-	204	-	ACAAATGTAGAGAGAATGGTC
	novel_mir_18	Chr3:36271499:36271667:+	AGGAGAGGTTATGGATGGATGGATGGATGGGATTGGATTCCCCTTCCCCCGCCCCCAACTAAACAAACAACTAGTATATGCTAAGGGCGGCGCAACGCTAATACTCCTCCCTAGTCCTCCTAGGCTACTCCTCTCCTCCCTTCCATCCATTCACCCTTCGCTTCATCCG	.((((((((...((.((((((((((((.((((..(((.......))).((((((.................((((....)))).))))))...................(((((.....)))))............)))).)))))))))))).))...))))).))).	-55.8	B1-m0087-5p	-	8	8	-	ATGGATGGATGGATGGATGGG	-
	novel_mir_18	Chr3:3825506:3825618:-	GGATGGGTGGATGGATGGATGGATGGATGGGATGGAGCTGATCAATCGTGCGGTCACCTCCGATGGGGACGTCGCACCCAACCATACATCTCACGCCCAGTCCAGCCCAGCCG	((.(((((((((((.((((((..(((.((((.(((((.(((((........))))).)))(((((....))))))))))).)))..)))).))...))).)))).)))).)).	-47.5	B1-m0088-5p	-	8	8	-	ATGGATGGATGGATGGATGGG	-
	novel_mir_217	Chr3:7365997:7366080:-	AATTGCAAAGAGAAAGCTTCTATACTGTGCCAATCGGAGCACATGGTAGTATGGTACTGTAACCAGAAGCGGGCTCGGGCTTTA	....((...(((...((((((.(((.((((((((((.......))))....)))))).)))...))))))...)))..))....	-23.5	-	B1-m0089-3p	8	-	8	-	TGGTACTGTAACCAGAAGCGGGC
	novel_mir_154	Chr3:29333217:29333470:-	AAGCTGCGACAAACTTTCCTGGTCGCGTCGGGGAGGAGTGGCATCTGGCGGCTGGGGATTGCCACCGGTGACCTTCAGGCCAGATCGAGAAGGACTACTGAGGGTAGCCGGGAGGGGAAGAAGCTCTCGGGAGGGAAGTGGAGCAGTGAGAAGAGGACAGGAGACTGGGATTGGCTCTTCACCGGCAGCCTTACGCTCTCAGAATATAGACGCCGCTCCTCCCCGACGCGACCAGGAAAGTTTGTCGCAGCTTT	((((((((((((((((((((((((((((((((((((((((((.((((..(((........))).(((((.((((((((...((.((......)))).)))))))).)))))(((((.......)))))(((((.((((.(..((.((((..((((..(((....))).......))))))))..))..)))).).)))))......)))).)))))))))))))))))))))))))))))))))))))))))).	-152.1	B1-m0090-5p	B1-m0090-3p	151	146	1	AAACTTTCCTGGTCGCGTCGG	GACGCGACCAGGAAAGTTTGT
	novel_mir_218	Chr3:32478127:32478230:-	GCTGGGTGAGAAATGTTTGAGCATTGCATTGGCCTCCTACTAGGAGTGGAAGGCATCCGGATAATTTCTGAGAAAGGTGCTTGATCAATCGTTCTCTACTGAAA	..(.((((((((.((.((((.((..(((((.((((.(((((...))))).)))).((((((.....)))).))..))))).)).)))).))))))).))).)..	-29.2	-	B1-m0091-3p	13	-	13	-	AAGGTGCTTGATCAATCGTTC
	novel_mir_219	Chr4:13025969:13026054:+	AGTCTGCAGCACGTTGCCACGGCGGGCCATGGGCGGCTGACAGGCACTATATGTGAGCATCCAAGGAACTTGCGTGGCCTGAGATC	.((((.(((......((((((.((((((.((((..(((.(((.........))).))).)))).))..))))))))))))))))).	-31.4	-	B1-m0092-3p	11	-	10	-	AGCATCCAAGGAACTTGCGTG
	novel_mir_220	Chr4:13157402:13157549:+	TTTATTTCACGGTACATGGAACAGGTAGGGTGTAATGGAGCTCCTGATGCCTCTTAGACCTAATATGCATGTAAGTTTTTTTAGGAGCAAATTTTTGTCGTATGCTTGGCAGGTTATTCCTTGCCTTCTGCTATGTCTGAGCTGCTCC	.........(((.((((((...((((((((.(((((...((((((((.....((((.(.(......)..).)))).....))))))))......((((((......))))))))))).))))))))....))))))))).........	-39.7	B1-m0093-5p	-	7	7	-	GGTACATGGAACAGGTAGGGT	-
	novel_mir_56	Chr4:13393623:13393776:+	AGTTCAAGCTACATGACTGTGTCAGGCGTTGAGATATTCTGCATTACTGCAGAGGAGTTGATTCCTTCAGTCAGCTTGTCTCCTTGGATGTGTAGAAATCTGCAAGATGGATGCATGCGAAGGCATAATGGCGCATAGCGATGTGGAAGGAGAG	..(((...((((((..((((((..(.(((((.(...(((((((....)))))))(((((((((.....)))))))))....((((.(.((((((...((((...))))...))))))).))))).))))).)))))))..))))))...)))..	-47.2	B1-m0094-5p	-	107	105	-	ACATGACTGTGTCAGGCGTTG	-
	novel_mir_57	Chr4:14190379:14190652:+	GTCACCTAGTACACATGCTCAGGACCAAGAACGGCATTTCCCTCAATATCTGATAGTTCTAATCCTTCTGCCTCCCAAGCCCAAAAAGCCCCATACACCATCCACGCAGGTAAAATTGAGAAAGGGAATCAACTATGCATAATTTATCACTTCAGGCTAGGGAAGCGGAAGAGCCATCGGATTTTATAGTCAAGCTATTTACACCTTGCCAACTACATCACATTTTGGCCACGAGTAGTGTGCAGTCATTCACCACATGAATACGCAGGTGGCA	(((((((.((((((.(((((.((.((((((..((((...........(((((((.(((((......(((((.((((.((((...............(((.........))).((((((.(...((.......))...).)))))).........)))).)))).)))))))))).)))))))...(((((...)))))........))))............))))))))..))))))))))).((.(((((.....)))))))..))))))).	-66.7	B1-m0095-5p	-	20	20	-	ACACATGCTCAGGACCAAGAA	-
	novel_mir_221	Chr4:14370058:14370143:+	CGGGTACAGTCTACAAGAGCTGCTCTATGCTGTGAACTACCCATGTCTAGTTTGGTAGAGCATCTCCAGTGTGGGGCTAGCATCGA	(((((....((((((.(((.((((((((....(((((((........))))))))))))))).)))...))))))....)).))).	-25.3	B1-m0096-5p	B1-m0096-3p	6	5	1	CTACAAGAGCTGCTCTATGCT	GGTAGAGCATCTCCAGTGTGGGG
	novel_mir_222	Chr4:14601824:14602180:+	ACAAATAATTCATTGCATGCCGTTCAGATAGCCTAGCAGTTTTGCTGTAGACCAAAAGATGGAATAAGCTGTATAAAACCACTTTTGTACTTAGTACGTATATCAAGCAAGGTGAGCAAAATAATGAATTGAAAGACATCTTGTACGGGTAAAAATCAGGAGAGAACTCACTAACTAGGGCAAGTTGTCAATAGATTCAAGAGTCTCTATAACACTGGGTGATCTTGTTCGATTGAGCACTCTTAACAGCAAAGTTGGGTAACTATCCCTCCCGGTTAAGGCTGCGAGACCTCTTTATTTCTTGATTGCCTGCAGCCTGCGTGCTGTCTGGATGTGGTACGTAGAGCCACTATTTGG	.((((((...(.((((.(((((((((((((((...((((....(((((((..(((..((.((((((((((((((((((....))))))))..)))..((.((((......)))).)).......((((((....((((.(((((...(((.......(((((....))).)).)))...))))).))))....))))))((((((((.....(((((((.(((..(((((....)))))..((((((......)))))).....)))...))))))...).....)))).)))))))))))))..))).)))))))))))..)))))))))))..)))).)))).)....)))))).	-91	-	B1-m0097-3p	90	-	89	-	TCTGGATGTGGTACGTAGAGC
	novel_mir_223	Chr4:15004453:15004575:+	AAAGAAGGGATCTGGAGTTTTGACGAATTAAAGGCTATAAACACATCAAGAAAGAAATATTAATGCATTATCAATAGCAGAAACTGCGAATAGTTTTTCAATCTCTAGGGAGCCCAATCTTTT	(((((.(((.(((((((..((((.((((((...((..........((......)).........))..........((((...))))...)))))).)))).)))))))...)))..))))).	-22	B1-m0098-5p	-	17	17	-	TCTGGAGTTTTGACGAATTAA	-
	novel_mir_224	Chr4:17250300:17250383:+	CTCTTTGTTTGGGGATGTAACTTCAGCGGGAACCTCAAGTTTTCCTCACATATCCGATTGATGGATAGATTGCCGAAGGAAGAA	.(((((.(((((.(((.((.(((((((((((((.....))))...........))).)))).)).)).))).))))).))))).	-21.7	B1-m0099-5p	B1-m0099-3p	12	4	8	GGATGTAACTTCAGCGGGA	CCGATTGATGGATAGATTGCC
	novel_mir_225	Chr4:17355683:17355878:+	ATACTGTAGCAAAATAGATCCGATGAGTCTATCGCCGCTCTCATTGAACATAAGGAATCACTCCGAGAAGAATTTATGTTTTTTATCAGCGACCGGCTTTTGCAGCTTTCCAATGCCAGGCTTAATCATGGGCTGGCTAGCCAAGGTGATATAGACTTTTTTTTTTCGACTAGAGTTTGGGATCAATCTGCATAAA	....(((((....((.(((((.(.((.(((((((.((((......(((((((((...((.......))....)))))))))......))))....((....)).(((((.....(((((.((.......)).))))).....)))))...................))).)))).))).))))).)))))))....	-42.6	B1-m0100-5p	B1-m0100-3p	14	1	12	GATCCGATGAGTCTATCGCCG	TCGACTAGAGTTTGGGATCAA
	novel_mir_58	Chr4:17363428:17363576:+	ACGATGCATGGAGGTTCTTAAGTCTACCGAGAGTATTAGATCAAGTATGTACATCTTTCATTCTCGGGGAAATGGTCGATCAGTATGAACCATTGGTGCCGCATATACATAACTGAGCTGATTTCGGATACGTTGGAAATTCCGTTCGC	.(((...((((((.((((...((.(.((((((...((((.(((..((((((.............(((.(.((((((..((....))..))))))..).)))....))))))..))).))))))))))).))...)))).))))))))).	-33.9	-	B1-m0101-3p	17	-	16	-	TGATTTCGGATACGTTGGAAA
	novel_mir_59	Chr4:17418974:17419104:+	AAGGTTAATTTGGAGTTTACTGGCTAGACTATGATCGAAACCGTCACAGGCATATGCGAGGGGCATATAGGAATAGGAGGCATGTGGGAGTTAACTTGAACGAGATCAGATGGTCACTCTATACCCGCTTC	.((((.....((((((..(((..((.((((.((.(((((((..(((((.((((((((.....))))))...........)).)))))..)))...)))).)))).))))..))).)))))).....)))).	-26.5	-	B1-m0102-3p	44	-	44	-	CGAGATCAGATGGTCACTCTA
	novel_mir_61	Chr4:17474107:17474276:+	CACCAAGCAATATGTTGTCTTCTTCACCAGTGCATGCAGATCCTTTTCTCTATAGCTACAATTTTAGGATGGGGAGACGTGAGGAATCAAAATATGCGAAGGATGTGCGACTCAGGAACAAGGTTAGTTACACAACCCACTGGTGCTGAAGTAGGGATGTAGGTTCCAGA	.....(((.((((.((..((((..((((((((..((((.((((((((((((((..(((......))).)))))))....(((....)))........))))))).))))............((((........))))))))))))..))))..)).))))..))).....	-45.2	-	B1-m0103-3p	290	-	287	-	CTGGTGCTGAAGTAGGGATGT
	novel_mir_226	Chr4:17572052:17572127:+	TATGGTTGTCCCTGGCAAGTTGTTTGGCTGTAACTCTGTTGACATCCAGTGGCCGATGTGCCAGAGGGCTTCTGAC	..(((..((((((((((.((((..(.((((....((....))....)))).).)))).)))))).))))..)))..	-25.2	B1-m0104-5p	-	7	6	-	CCTGGCAAGTTGTTTGGCTGT	-
	novel_mir_62	Chr4:17663201:17663402:+	TTGTCCTCAATGGTGATAACAGGAGCTTGGAGCATGGGCGAGCCCATCCTCTCAATAACTTTATCATCATTAAGCCATTAAGTAGACAATGTGACTAGCAGTTCATTAAGCCTGCCATAGCATGCATTGCCATACATGCATGTTTCTTTTTTCTTGAAAAAGGGATTGCCGAGTTAATGTTTCCTAGCCTTGTCGAGGGAAA	.....((.(((((((((((.((..(.((((((.(((((....))))).))).))))..))))))))))))).))......((.(((((...(((((.(((((((..............(((((((((........))))))))).(((((((...))))))))))))))..))))).))))).))..((((....))))...	-53.2	B1-m0105-5p	-	102	100	-	TGGTGATAACAGGAGCTTGGA	-
	novel_mir_63	Chr4:21204394:21204633:+	AGAACAGATCCAACTTGTTAGACTTTTGCATGTATTTGGGGTGTAGGAAATAGTTAAAGGAAAGGTCCAGATTCCCCCCCCCCCAAAAAAAAAAAACTTTAAATTAAAGTTTATCTAGCACCCTAAACTTTGAAACCGAATATTCAATCCCCTCAATTTGACAATACCATTTATAGAACCACCTAAGGTGGTTTTGCATAGTTATTTTTATCTAATTGTTATATAAGTTGGATGAGTCTG	(((.(..(((((((((((..(((..(((.(((..((((((((((.(((..........((...((........))...)).............((((((((...)))))))).))).))))))))))..(((((........)))))..........................((((((((((...))))))))))............))).)))..)))..)))))))))))..)))).	-51.6	B1-m0106-5p	-	45	45	-	CAACTTGTTAGACTTTTGCAT	-
	novel_mir_227	Chr4:21645306:21645443:+	GGAGCACCTAAGAACGATAGGAATGGGAGGCATCGGGAAAAATACTGAGACAAATATCCACCTCCACTTCCAGAAGTGAACACTGAGAGCTCATTTTTCCTCTATGTTCCCATTCCCACTGCTCTTAGACTACCTCTT	((((...((((((.((...((((((((((.(((.((((((((...((((.......((......(((((....)))))......))...))))))))))))..)))))))))))))...)).)))))).....)))).	-38.7	B1-m0107-5p	-	9	9	-	AGAACGATAGGAATGGGAGGC	-
	novel_mir_227	Chr4:21661515:21661649:+	GAAGTGCTTAAGAACGATAGGAATGGGAGGCATCGGGAAAAAACCAAACCAAATTTCCACCTCCATTGCTGGAGGAAGAAATTTGGTTTTTAGGCTTTCCTCCATGTTCCCATTCCCACTGCTCTTAGGCTCTCT	..((.((((((((.((...((((((((((.(((.((((((...((((((((((((((..((((((....))))))..))))))))))))...)).))))))..)))))))))))))...)).)))))))).))..	-59.9	B1-m0108-5p	-	9	9	-	AGAACGATAGGAATGGGAGGC	-
	novel_mir_64	Chr4:13025823:13026157:-	AGTTACTGTTATTCTCCTACTAGGTTTGTTCCTGGCCTCCTGGGCATGGCAGGAATTGGAAACTATTCAGGCACCTTCGATCACCTTGATCCCAGGTCTGGTTGATCTCAGGCCACGCAAGTTCCTTGGATGCTCACATATAGTGCCTGTCAGCCGCCCATGGCCCGCCGTGGCAACGTGCTGCAGACTTGGTAAAATGCTGTTTCACTCTTCGGTGTGATAAGCACACACTAATACGGATGCCCAGGAGAGACCCTAGCTGGTGGTGGCCTGGCCCGGCGGTGTCTCTACTATGCCTAGCGATTGGATAAATTGGTAGAGTGGATGCAGCTGAT	.((((((((.((((.((((((((.(((((((..((((((((((((((.((..((((.(....).))))..))......(((((...)))))(((((((((........(((((((..((((...))))..))............))))).((((((.((((((....))))))...)).))))))))))))).....((((...((((........))))..)))).............))))))))))).).))(((((((((((.((((((......))).))).)))))).).)))).....)))))))))))))).).)))))))).))))	-112.6	-	B1-m0109-3p	188	-	186	-	TGGATAAATTGGTAGAGTGGA
	novel_mir_228	Chr4:13168723:13168910:-	CTTCCAATTGCCACATGGTATGACAGGCGAGATGATACCTCTGGCAAAGGATCGAGGAATGGCAGCAGAGTACTTTAGGCTTCAATATCTTAATCTCTGTCCCCTGTTACTGGATAAGTTTTTACAAATTTGCTTTTAGCGGTCAATCTCTTCCTCAATTTCACTTGTGGACTAACGGTCAAGAGGAG	.((((..(((((...((((.(.(((((.((((((((.(((.......))))))((((((.((..((((((......(((........)))....))))))...((((((..((.(((((((....)))))))))..)))))).....)).)))))).))))).))))).)))))..)).)))..))))	-41.8	B1-m0110-5p	B1-m0110-3p	31	5	25	ACATGGTATGACAGGCGAGATGA	ATTTCACTTGTGGACTAACGG
	novel_mir_229	Chr4:13253541:13253891:-	CATGCCGAGGTGTGATCAGCCGTAGATACTGCAACATTGGCCATGCCTCCATGCGATGCGCCAATTCATGTGTAGCTGAGGTGATTAGTGCCACATTGAGAAACAGATACTACTGGAGAAATCATCTTTGGTCGGTTGTCCAAAATCCACAATTGGTCCGGTTTAAATAAGAACCGGGACTAAACAATATTTTTAGTCTGGTTTAAAGAACTGACGTCACCTTTTGATCTTTAGTCCCGGTTGGAGTTACCAACCAGGACTAAAATTTTTTTAGTCCCGGTTTAAAAGAAAGCAGACTTTGTCAGACCCCTCCTCTATCTTTAGTCCCGGTTGGTATTACTGATCGGGACT	...(((((((.(((((...((((((((.(((....(((((((((((......)).))).))))))(((((((..(((((.....)))))..)))).)))....))))).)))).))....)))))))))))).((((...(((...........((((.(.(((......((((((((((((((...........(((.(((((...))))))))((((.....)))).((((((((.((((((.....)))))).)))))))).....)))))))))))))).....))).).)))))))...))))..............(((((((((((((...)))))))))))))	-110.7	B1-m0111-5p	-	5	5	-	TGTGATCAGCCGTAGATACTG	-
	novel_mir_223	Chr4:14287023:14287145:-	AAAGAAGGGATCTGGAGTTTTGACGAATTAAAGGCTATAAACACATCAAGAAAGAAATATTAATGCATTATCAATAGCAGAAACTGCGAATAGTTTTTCAATCTCTAGGGAGCCCAATCTTTT	(((((.(((.(((((((..((((.((((((...((..........((......)).........))..........((((...))))...)))))).)))).)))))))...)))..))))).	-22	B1-m0112-5p	-	17	17	-	TCTGGAGTTTTGACGAATTAA	-
	novel_mir_65	Chr4:14571152:14571268:-	CATGTAGAAGACTGATTTGTCTTGGATGTTTGATGTCACGCCCAGAAATTCACGAACCAGAATTTCTAAGCTGAATATGCATTAAATCCCTGTCCAGGACCAGCCAGGGTATACAAA	..((((.....(((.((.((((((((((((((((((((.((..((((((((........))))))))..)))).....)))))))))....))))))))).)).)))....))))..	-34	B1-m0113-5p	-	484	484	-	ACTGATTTGTCTTGGATGTTT	-
	novel_mir_221	Chr4:14902803:14902888:-	CGGGTACAGTCTACAAGAGCTGCTCTATGCTGTGAACTACCCGTGTCTAGTTTGGTAGAGCATCTCCAGTGTGGGGCTAGCATCGA	(((((....((((((.(((.((((((((....(((((((........))))))))))))))).)))...))))))....)).))).	-25.3	B1-m0114-5p	B1-m0114-3p	6	5	1	CTACAAGAGCTGCTCTATGCT	GGTAGAGCATCTCCAGTGTGGGG
	novel_mir_65	Chr4:15194360:15194476:-	CATGTAGAAGACTGATTTGTCTTGGATGTTTGATGTCACGCCCAGAAATTCACGAACCAGAATTTCTAAGCTGAATGTGCATTAAATCCCTGTCCAGGACCAGCCAGGGTATACAAA	..((((.....(((.((.(((((((((((((((((.(((((..((((((((........))))))))..)).....)))))))))))....))))))))).)).)))....))))..	-35.5	B1-m0115-5p	-	484	484	-	ACTGATTTGTCTTGGATGTTT	-
	novel_mir_230	Chr4:17397144:17397319:-	CCGTAGCAGCAAACAGAAGCCTTCATTCCGATCACGGAGCTCTTCCGCAACACGCATCAAATCTCTTATGCCTCCCGTTCCTAGTTTGTGCGCACGTAACACATGCCCAGTCATTTCCTCTCTCAATCTTGCTTGTTTATATATGGGGTGCCGGGTGCAGCTTTTTGCTCAGTATC	.......((((((.((..((((.(((((((....((((.....)))).....((((.(((((.....(((.....))).....)))))))))...((((.(((.((..((.................)).)).)))))))...)))))))..))))....)).)))))).......	-30.9	B1-m0116-5p	-	5	5	-	AAACAGAAGCCTTCATTCCGA	-
	novel_mir_137	Chr4:17488209:17488303:-	GGCCGTGGCCAAGTGTGTAATGTTGAACGGACTGCTTCTCTGGCCCTTGTCACGTCTTCTTGTTCAGCATTGGATTGGGCTTGGCGTCAGGACCA	((((...(((((((((.((((((((((((((..((.....((((....)))).))..)).)))))))))))).))...)))))))....)).)).	-32.8	B1-m0117-5p	B1-m0117-3p	170	168	1	AAGTGTGTAATGTTGAACGGA	TTGTTCAGCATTGGATTGGGCTTGG
	novel_mir_231	Chr4:17705685:17705995:-	TGGCATCAAAGTGAACAGGCCCATAGTTACTCCCGCCGATTACCCGCACTTGGTTGAATTTCTTCACTTTGACATTCAGAGATCTGGGCATAAATTACATTGCGTCAGCATCCGCGAGGACCATCGCAATGCTTTATTTTAATTAAACAGTCGGATTCCCCTTGTCCGTACTAGTTCTGAGTCGGTTGTTCGACGCCCGGCGAAGGCCCCCGAAGGGGGCCGTTCCCGGTCCGTCCCCTGGCCGGCACGTGGCGGATCGATCTCATGGCAGGATGGACAGACAGTAACTTGGGCTTCGTGGCATTGAGTCC	.(((.((((.((.(..(((((((.(((((((.((((((....((((.......((((((.((........)).)))))).....)))).........(((((((......(((....)))....)))))))..............(((((((((((.......))))).))).)))....((((((((...((((.((((.((((((((((...))))))).)))))))..))))...))))))))...)))))).((.((((.......)))).)).....))))))))))))))..).)).))))))).	-108.7	-	B1-m0118-3p	8	-	8	-	ACAGTAACTTGGGCTTCGTGG
	novel_mir_68	Chr4:17720762:17720925:-	TCTCCCGTCTGGCTCCTCGCCCATTCGGCCGTTCCGGGATTGGGATTCGATGACATTTCCCCATGACATTCTCGATGATTGAGTCACTACACGTGGGTCCAGGCTCATGTGGGTCCCGCATGTCAGTGACTCAATGTCACTGAGAATGTCACGGGTCACGGGGG	.(((((((..(((.....)))(((.(((..((((((....)))))))))))).......(((.(((((((((((.((((((((((((((((.(((((((((........)))).))))).))).)))))))))..)))).))))))))))).)))..)))))))	-74.8	-	B1-m0119-3p	102	-	99	-	ATGTCACTGAGAATGTCACGG
	novel_mir_215	Chr4:20987821:20987900:-	TGTACCAACACAGCAAGTACAGGAGGAGCATGCCTCTGATCCTCTCGTGGCTCTTTCTGATTTAGCCTTGTATTGCTGCC	.(((.(((.(((((((((.((((((((((..((.............)).)))))))))))))).))..))).))).))).	-21.1	B1-m0120-5p	B1-m0120-3p	28	26	1	CAGCAAGTACAGGAGGAGCAT	GCTCTTTCTGATTTAGCCTTGTA
	novel_mir_139	Chr4:21089993:21090305:-	TTCCGCGTTTCTAGGGAGTACTAGAGTTGATGCAGCTTTGTCCCAGATGCCTTCCATGCCTATATGCCTAAACTAGAGCGATCGATGCATCATCGTCTCGACGGTCGTTGGAAAATTTAGTTCCCAACTCACTAGGATATATATAGTTTGTTGTCTGGTCTCACTATCACCTCGGTCTTGTATTTCTTTTATAATCATAGCACTATATATACTGGACGCAAAGGAAAATCATGTGTGTTTCACATCTTTTTTTTAGTCCAACAAATATTCCAATGCAGAGGATTATATCTGTATTCTCTAAAAACTTCAGGAT	.(((..((((.((((((((((.(((..((((.(..(((((.....(((((..((.(((((((...........))).)).)).)).)))))(((((....)))))((((((((.((((.(((((..........)))((((((((((..(((((..(((.........)))......(((((.......)))))..))))))))))))))).(((((..((((((((...(((((.....))))).)))))))).))))))))))).))))))))))))))))))..))))))))))))).))))....))).	-67.7	B1-m0121-5p	-	41	40	-	CTAGGGAGTACTAGAGTTGAT	-
	novel_mir_72	Chr5:3086479:3086703:+	ACTAGTGAATGGAAGGTATCAGGAATTTGGATCCCTCTTTGTCATTCCTGCATGGAGTAGTTTTAACCTCTTGAATCTTGATGGTGCCTCCATTAGGTTGGTTTAAATAATAACCTAGCCTGTTGTCTCATCCAAGTCTCTAGATTTTATTTTGTATGCTTGCATGGCTCTAATCCATTTTCTGTTGTCAGGATCTGAATATCTTGAGCATCCAGTTGTGCTAGA	.((((((..((((..((.((((((((((((((((((((.(((.......))).))))...........(((.((..((((..((((....((.((((((((((........)))).)))))).))...))))))))..)).)))........((((....))))((((..................)))))))))))))).)))))))).))))....)))))).	-56.4	-	B1-m0122-3p	232	-	232	-	CTGAATATCTTGAGCATCCAG
	novel_mir_73	Chr5:13976637:13976715:+	GCACGGGATAAGTGGAAACCTGAGATAGGTTGGCCAGAAGACGCACGACTTATGCAGGTACGCTCACTTGCTCCTAAAC	....(((((((((((..(((((..((((((((((........)).)))))))).)))))....))))))).))))....	-27	-	B1-m0123-3p	8	-	8	-	CTTATGCAGGTACGCTCACTT
	novel_mir_140	Chr5:18668026:18668219:+	GATACGCACCTAAAATGGCATCCTCTCTTTCCAATCACGGGACATGCGCCAGAGCATCAAATCATTCACAATTAAACTTTCAAGATTTCGCTGCGCTGCGCCGAAAGTGACTTCGTCGCTTTGTAATTAATAAAGCAAATAGTTATGCAGCATGTGCCGCTGAAAGTGACGGTGTCGCTTTGCAATTATTGTCA	((((......((((.(((((((.((.(((((......(((.(((((((((((.(((.((((((....................))))).).))).))).)).....((((((.....(((((((.....)))))))....))))))...)))))).)))..))))).)).))))))).)))).......)))).	-47.8	B1-m0124-5p	-	17	17	-	TAAAATGGCATCCTCTCTTTC	-
	novel_mir_75	Chr5:29688157:29688507:+	CTTACTCCTTATCTTTTCAGTTCTTGTTCCAATTCCGATTACGGTGGTGGCCCATGTAATTAAAAGGCCCATATATATATAAGCTGGCAAGGCCGCAAGACTGAAGAGGAGAGGCAATGCCATGCATGCAGATGAAGATCGCTTCTCTTGTATGTAAGTATGTATGTAGAAGGAAAATAAGGGGGAATATATATAGTAAAATAGTAATTCAGGAGTGGTGGGTGTTCCTGAAAGAGCTCATGGCCACAGGGCTTAACATAGAATCATCTTAATTGTGCGGAAGAAACAAAGCATGCACGCGCAGGAGGATGGAGTAGTAGAATGGATGGATGGATGGATGGATGAGGGTAG	.((((.((((((((.((((.(((((..((((.(((.(((((((.(((....))))))))))...((((((.((((((((((...(((((..(((......((....))....)))..)))))(((((((((..((((....))))..)))))))))..))))))))))................((((...(((......)))...))))....(((((.((.((((......)))).).).))))).)))))).........(((((((..(((((((..................))))))).))))))).......)))))))..)).))))))).))))))))))))	-96.7	-	B1-m0125-3p	16	-	16	-	AATGGATGGATGGATGGATGG
	novel_mir_232	Chr5:24790027:24790376:-	ATCGCGGCGGCGGCCGATCTCGCCGCCGCGGCCGAGGAGGACTCACCGTGCTCGTGAGATGAAAACCCTAGCTCTCGTATCCTCGTTTAACAGTATAGTTTTTCTCCTGTTCGTAATAAGATTGTATCATCTTGGTATTATTGGTCAAATTTAATAACTCAAGATATCACTGCTTTTCTTATATACGAGCTTTTTTACAATCTTGTTGCAACGACTCTCTCAGTTACCACCTAAGTTATTTGTGGTTTCACTGCATTGTTTCCCTCTGTAGCGGGTGAAACGTTGCACGGGGGAGCCAAGCAACGGCTTGTCTTGGATCAACCACGGACACGTGTCGGCCTCTGGCTTGA	..(((((((((((......)))))))))))(((..(((((.((.((((((.(((((.(.(((...((..((...........(((((((((((.((.((.........(((((((((((((..(((..(((((((..(((((((......))))))).))))))).....)))...)))))).)))))))......)).)).)))))).)))))......((((.(((((..((....)).)))))...))))....((((((((.(((((((.......))))))).))))))))(((((....))))).)).)).))).)))))).)))).)).))))))))))....	-114.4	-	B1-m0126-3p	8	-	7	-	AACCACGGACACGTGTCGGCC
	novel_mir_233	Chr5:24910675:24910761:-	TAGCTAGTAAACTGAAATGAACTGATGGCTAATGTGATTTTGCTCCCAATACCATACGTTGTCAGTTTGTCACATATTTATGTGCAG	..((..(((((.((..(((((((((((((...((((...(((....)))...)))).)))))))))))))..))..)))))..))..	-19.5	B1-m0127-5p	-	15	15	-	ACTGAAATGAACTGATGGCTA	-
	novel_mir_79	Chr5:25105550:25105704:-	TCAGCTGGAGCTTCTGTAGGATCAGGTTGTTCGTTTCAAATTCCCCATGCATCTCATTCTTAGGGCACCACTGGTTTCTCACAAATCAGAGTAAGGGAATGGTCTGAGATTTGCAGTTTCCGAATGCCTGGTTTGTCCAGAGTAGTAGCAGCCTT	...((((..(((((((..(((((((((.(((((..............((((......(((((((.((((.((.....(((........)))..))))..)).)))))))..)))).....))))))))))))))...))))..)))..))))...	-41.7	B1-m0128-5p	-	159	159	-	CTTCTGTAGGATCAGGTTGTT	-
	novel_mir_80	Chr5:25143438:25143654:-	TGAACTGGACCATACTCAGATCGACGCAGTTCACCTTGAATTCCCCATGAATCCCATTCTTAACTTAAGGGCATGCTATCACTTCTCGTCGTCGAACCACCGCCGGTACGCTGATTTCTCGTAGAAATGACCAGGGTTCGAATTTTGAGTATTGAGCGATCAGCGTGACTTGGAATATTGAGTGATCGAGTGTGACTTGGAACTTAGTGCTATTCAT	((((..(.(((((((((.((((.((.((((...((..(.((((.....))))(((.............)))(((((((((.(((((((...((((((((((...)))...(((((((((...))))))...))))))))))....))))....))).))).)))))).)..))...)))).)))))))))))))............)).)..)))).	-51.2	B1-m0129-5p	-	75	73	-	CATACTCAGATCGACGCAGTT	-
	novel_mir_234	Chr6:3649180:3649418:+	ACTTTCGTGCAATGGTTGTGCGAGATCGACGGTATATTTTTGTAAAAGTTTTGAATCCCGGATATTTCTATAAATAAAATAAATGAACATTATATTTTCAAATTTAATTCGCTGCTTATAATACGAAGCGAAGGGAGTACTATTCTCCCAAGTTCTTAAACTGTAATATTAGCATCACACAAGGACGCAAGTGAAAATTACCCATCGATCTACTACCACCACCAGGTCGCACGATCGGC	.((.((((((..((((.(((.((((((((.((((....(((((((((..((((.....))))..))).))))))...................(((((((.......((((((.............))))))(((((.......)))))..((((((....(((.......)))......)))))).....)))))))))))..))))))).)...))).))))....))))))..)).	-51.3	B1-m0130-5p	-	11	10	-	AATGGTTGTGCGAGATCGACGGT	-
	novel_mir_235	Chr6:4746346:4746596:+	TCATGAGAGCATGGAAGTTGTTTTTCCCTTGTTTTGTTTTCTTTACCTTTAAGAGTTTTTTTTTAAAAAAATAAAAAACTTTTTTGGAAGTTCTTCCTTTCGTAGTAACACGGTAGAAAAAGAAATAACTTATACAAGAATTTTTTTTATAATCGAAGAAAACTTCTGACCACTGAAGCAATGCTCTTTAATTGTTGGTGAGTGGTGACATACACAATGCAAACGATCGAAAGACAACCTTGCCACACCAC	(((((....)))))..((((((((((..((((((.(((((((((...((((((((....))))))))...((((((((..((((((.((((((((.((.((((......)))).))...))))....))))...))))))..))))))))....)))))))))...(.((((((..((((((........))))))....)))))).)(((.....))).))))))..)))))))))).............	-50.6	-	B1-m0131-3p	24	-	24	-	AAACGATCGAAAGACAACCTT
	novel_mir_236	Chr6:9494316:9494381:+	GTTCATGATGGGCAGCATGTGAGTACCTTCGTTACAGTGTAACTCGCCGTGCTGCCCATCATGCCG	...(((((((((((((((((((((((((.......)).)).))))).))))))))))))))))...	-37	B1-m0132-5p	B1-m0132-3p	22	1	21	CAGCATGTGAGTACCTTC	AGTGTAACTCGCCGTGCTGCC
	novel_mir_237	Chr6:9531755:9531911:+	TACTTGTTCAAGAAGCTTCTGGCACCTTCCACCGCTTGTATCTCCCTATAGTTGTTCGCCATCCAATTCTCTCTTCTGCGGTAGACTTTGCTGCTACTTTTACTGTTGGATTATCAGTTGAGTTGGTGTTGAGATTGCTGATTTGGGTTGCTAAGAA	..((((((((((.(((.(((((((((..(((..(((.(((....................(((((((..........((((((.....))))))..........)))))))))).))))).)..)))))).)))..)))..))))))....))))..	-30.2	B1-m0133-5p	-	6	5	-	AGAAGCTTCTGGCACCTTCCA	-
	novel_mir_81	Chr6:9542603:9542780:+	AGCAGGATGCTCTTGTTTTCACTGATGCCTCCTAGTCCTAGTATTTGGACTAGAAGATAAACAAAGATGGACAGATGGTTGAGGCCGGCAGGCATCTGGCATGCATGCTCCAAATTTGTAATAGAAAAACAAACTAACTAATGGAAGTGTGAGCTGAAAACTGAGGGCAAGATTTGAT	..((((.((((((((((((((((.((((.(((((((((........))))))).......(((((..((((((((((.(((.......))).))))))(((....)))))))..)))))........................)).)))).)).))))))).)))))))...))))..	-50.6	-	B1-m0134-3p	20	-	19	-	TGTGAGCTGAAAACTGAGGGC
	novel_mir_215	Chr6:11766557:11766636:+	TGTACCAACACAGCAAGTACAGGAGGAGCATGCCTCTGATCCTCTCGTGGCTCTTTCTGATTTAGCCTTGTATTGCTGCC	.(((.(((.(((((((((.((((((((((..((.............)).)))))))))))))).))..))).))).))).	-21.1	B1-m0135-5p	B1-m0135-3p	28	26	1	CAGCAAGTACAGGAGGAGCAT	GCTCTTTCTGATTTAGCCTTGTA
	novel_mir_215	Chr6:11816408:11816487:+	TGTACCAACACAGCAAGTACAGGAGGAGCATGCCTCTGATCCTCTCGTGGCTCTTTCTGATTTAGCCTTGTATTGCTGCC	.(((.(((.(((((((((.((((((((((..((.............)).)))))))))))))).))..))).))).))).	-21.1	B1-m0136-5p	B1-m0136-3p	28	26	1	CAGCAAGTACAGGAGGAGCAT	GCTCTTTCTGATTTAGCCTTGTA
	novel_mir_238	Chr6:15730156:15730371:+	CGGACGGCGCCGTCCTCTGCCGACCACTTCTCCGACAACGGGCACAGGCGACGGCGCGACCTCTGGTGCCCGCTGCCACCACCTTCCCCGATGATGACGAGCTTCGGCTAAGTTGATAAGGGGCAATTTTGTCTCATCACCTAGTAGAGGAGAGAAAATCTTTTTGAAAATGAATAAAATGATAAAAATGGCAAAGTGGCGGTAGACGCACGCTCC	.((((((((......(((((((.((((((..(((.((.((((((((((((......)).)))...))))))).))..........((((......(((.(((....)))..))).....))))..(((((.((((.((........)).)))).))))).............................)))..)))))))))))))))).)).)))	-67.8	-	B1-m0137-3p	5	-	5	-	AAAATGGCAAAGTGGCGGTAGA
	novel_mir_85	Chr6:24616964:24617158:+	TTGTTTGGTGAACCAAAGAACACCAAAACCCTCTCGGATTGATGTTTTTTTAGTTGAATTCCTCCCATTCCAAAGGAATTGTAGATGATCCAGACACAAATTAAACAAGCTCCTTAAATCGTCAAATGCATAGGGAAAGGGAGGCACCGGGAATACAATTTCAAGGAATGGGATCTGTAGAGGGAAGACGAGCGT	...(((((((..........))))))).((((((((((((..((((((((.(((((.(((((((((.((((......(((...((((((............................)))))).)))......)))).)))).......))))).)))))..)))))))).)))))).))))))...........	-47.5	-	B1-m0138-3p	72	-	71	-	GGAATGGGATCTGTAGAGGGA
	novel_mir_86	Chr6:28312353:28312687:+	TCTGTCTCCTAATCTGCTGGTTTGTGTGGCGAGAGCGCAACTTCAGAATTTTTGAACAGAAAACGCGAACGGCGTTAGAACTCTTCAGAGATATCAAAGATGAAGTTGTAGTGTGGAGAGAGGCCAACATTTTGAGAGAAGTCGGCTAAAGGTCCCGCCTTTGGCGGTTTGCTTCGTTTTTCCTTTTCTTTCTGTTCTTCTCGACTGTTTAATGTCGATTTGTAAAACTTTTCATAACCTCTCCTGATCCTTAATACAATTTGGGCAGCCTGCCTTGGGCCGTCCCGGCTAAAAAAAACCACTGCTAATCAATCGGTGGATTCTTAGGTGACGCG	..((((.(((((((((((((((.(..(((((...((((((((((((((((((((((.((..(((((.....)))))....)).))))))))).)).....))))))))).))((((.((((((..........(((.((((((.(((((((((...))))))))).)...))))).))).....................(((((........)))))...................))))))(((.(((............))))))((......))((((...)))).........)))))))))..))))))))))))...)))).))))..	-94.6	-	B1-m0139-3p	94	-	91	-	CTAATCAATCGGTGGATTCTT
	novel_mir_194	Chr6:818604:818787:-	ATAATCAAGCAAGGTCGTTGTAGTATAGTGGTGAGTATTCCCGCCTGTCACGCGGGTGACCCGGGTTCGATCCCCGGCAACGGCGATTTTACTCCTTTTTTTAATTTGGGCCATATTAGATTGGAGCCCATATCGATCAGCCCACGGGCCGAACCGCTATATGGCGCCCATGTTGCCCATATTA	........((((.((.(.(((.(((((((((((((((....((((.(((((....)))))(((((.......)))))....))))....))))).........((.(((((..((......))..))))).))...((.(((....))).)))))))))))).))).).)).))))........	-58.5	B1-m0140-5p	-	9	9	-	AAGGTCGTTGTAGTATAGTGGT	-
	novel_mir_87	Chr6:4740913:4740987:-	TTGGTGAGTTTGTCTTTCAACTGTGTAATTGCATTGACAATGTTATGAATAGTACTGAAGGGCATAAATTCAGTA	.((.((((((((((((((((((((...((.(((((...))))).))..)))))..)))))))))..)))))).))	-20.2	-	B1-m0141-3p	69	-	69	-	ATGAATAGTACTGAAGGGCAT
	novel_mir_239	Chr6:4746595:4746783:-	GATTCTTACTCCGGGAAAGTTCAGACGTGTGGCAGGCCAAGCTGTTCTGGTCACTTAGTGACAGCACTTGATCTCATGTTACATTCAAGCATTTAGCACAACTTGTGCTCGCATCCTTCAATTTTTTTTGTCTTGTTTTGTCAAAAGGTATTTAACGGCCAGACGATGGGCTAATTTTCAGTGAGCCGT	....((((((..(((((((((((..(((.(((((((.((((.((((...(((((...))))))))))))).))).(((((.......)))))..((((((...))))))..........(((.(((((((.(.......).))))))).))).....)))).))).))))))..)))))))))))....	-46.5	B1-m0142-5p	-	17	17	-	CCGGGAAAGTTCAGACGTGTG	-
	novel_mir_240	Chr6:9494339:9494430:-	TTCCTGAACCGCAGTGAGCTCGGCGTCTCGCCTTCACCCGAGCGCCACACGGCATGATGGGCAGCACGGCGAGTTACACTGTAACGAAGGTA	..(((.....((((((((((((.(((((.(((((((.(((.........)))..))).)))))).))).)))))).)))))).....)))..	-36.7	-	B1-m0143-3p	27	-	26	-	CAGCACGGCGAGTTACACTGT
	novel_mir_241	Chr6:9573536:9573625:-	AGTGCCATGCCACTAGCCCTAGACACTGCAATCCTGTATGGCAGGTGCAGCCATGGTGAAGGGGATCTCAGGTGTCGGCTCAGTTGGCAC	.((((((....(((((((...((((((...(((((.((((((.......))))).....).)))))....)))))))))).)))))))))	-34.3	-	B1-m0144-3p	14	-	13	-	AGGGGATCTCAGGTGTCGGCT
	novel_mir_88	Chr6:9574910:9575031:-	CTTCCTTCCCTAGAGCCAGCAGCACAAGTGCACAATTAGGGGTTAGGAGGCATCATGAAGCTCAACAAAGTGCTGCTCGTGAATGTTTGTTCTGCCTAGCACCTAAGACGTATGGAGGGTCT	...((((((.....((.....))....((((....(((((.((((((((((((((((((((.(......).)))..))))).)))).....)).)))))).)))))...))))))))))...	-32.5	-	B1-m0145-3p	9	-	9	-	CTGCCTAGCACCTAAGACGTA
	novel_mir_242	Chr6:9604625:9604734:-	GATTCAGGAATCCTCATCAGTTGGATGATTTGAAACGATTGAAATGCTTGGATATTCAATAGAGCCATAATGTGGGCCTTAGATCTAGTCCATTTGATAGAGAATGAATG	.(((((......((((((((.((((((((((((....((((((((......)).))))))...(((........))).)))))))..))))).))))).)))..))))).	-23.5	B1-m0146-5p	-	5	5	-	TCCTCATCAGTTGGATGATTT	-
	novel_mir_243	Chr6:9731103:9731292:-	GTGGGTCAGCTATGGCATGCAGAGGATTTGTTCTCTTCGGCGTTGACGCTTTCAGGGAGAAGGCTAGCTGAAAGCATGCCGTGTATCTACCAACTTGTGGAAACACGTTCTATAGGTGCAGGTGTGATGCTGAATTATAATGAGTGGCACAAATTCAGGGAAAAGTGGTTGCATGCTGAGTAAGACTTGA	..(((((.(((..(((((((((...((((.(((((..((((((....((((((((..((....))..)))))))))))))).(((((((((.((((((((((.....))))))))))...)))).)))))..........(((((.......))))))))))))))..))))))))).)))..)))))..	-62.9	-	B1-m0147-3p	5	-	5	-	GAAAAGTGGTTGCATGCTGAG
	novel_mir_244	Chr6:12021153:12021429:-	GTGCATGTGTTACCTAGCTGAAACCATATCAAATAATGCAAGTTGCCATCTCTAGGCATGAAAGGAGTCAGGCATGTCGCCATAGGACTCTATTGGAGCAAAGGTCAGGTGTTATCAATTATCTGGACAACATGCCGCCATAGCAGGATAGGATATGGGTTGTTCGATGCTGCTTTGGATGAGTACAAGTTAGCACGATCTCCCAGTCAGTGTAGGATTCGCAATTTCAGACTCAATTTTGAACCAAATGATAGGTTTTTGTAGGATTAGCCAGACA	.((..((.((((((((.(.((((((.(((((..........(((((.(((.(((.((.(((..((((((.((((((((.((((((....))).))).).....((((((((........))))).))).))))))).(((.(((((.((.(((((.....))))).)).))))).)))..................)).))))...))))).))))))..)))))((((((......)))))).....))))))))))).)))))..))))))..))	-71.4	-	B1-m0148-3p	13	-	12	-	AATGATAGGTTTTTGTAGGAT
	novel_mir_245	Chr6:25683457:25683601:-	CCAAGTCCCGAATCCTTTTGTCTCAAGTCTGCCTTGGTAATGTGACCAAGATCCAAATTCGAATTGGTTCCTGGTCCTGTTTGGACATAGAATCGAGTCCTTGTGAATGGGCAATTGGATTTGGATAGAAGGGTACATTCTTTTA	...........(((((((((((.(((((((..((((((......)))))).............(((((((...((((.....))))...)))))))((((........))))....))))))))))))))))))...........	-43.9	-	B1-m0149-3p	19	-	18	-	TTGGATTTGGATAGAAGGGTA
	novel_mir_90	Chr6:26473452:26473802:-	TCACTATTTAGTTGCCATTTTGTTGCACATTGCCATTCCTCTTCTCCCTCTCTCTGACTGCATGAGTACGTATGTACTCTGCTTAGAGCAAGTTTAATAGTACTAGCTAAATGCTCGTGCGTTACAACAGAATTCTAAAAGAGAACTTCATTTTTCTAAAACCATTCCCCATTGTCGACTCACGAGACTATAGATGCATCAATAAAATTTTATTGGTTAGCTCGCATGACAAAATGATTCCTAATCATGATCCTAACTTAAAGTTGCTATTAAATTTTCTAATGGATTTTTTGCGATTTCGATAGCCTGGTTTTCTTGAATGGCTGTGATGATTTGGCTGCCCCCTCGAGA	..........((.((((..((((((((....(((((((.......((....((((((..(((.((((((....))))))))))))))).(((((((((((((((..(((....((((((.(((((((..((((......((((((......))))))......))))....)))).))).))))))....)))......((((((....))))))(((((....(((((...............)))))...)))))....)).))))))))))))).(((.((((...........)))).)))...)).......)))))))))))))))..)))).))..........	-80.7	-	B1-m0150-3p	90	-	89	-	TGGCTGTGATGATTTGGCTGC
	novel_mir_140	Chr6:27238478:27238671:-	GATACGCACCTAAAATGGCATCCTCTCTTTCCAATCACGGGACATGCGCCAAAGCATCAAATCATTCACAATTAAACTTTCAAGATTTCGCTGCGCTGCGCCGAAAGTGACTTCGTCGCTTTGTGATTAATAAAGCAAACAGTTATGCAGCATGTGCCGCCGAAAGTGACGGTGTCGCTTTGCAATTATTGTCA	((((......((((.(((((((.((.(((((......(((.((((((((....................................(((((.(((...))).)))))((((((.....(((((((.....)))))))....)))))))).)))))).)))..))))).)).))))))).)))).......)))).	-45.2	B1-m0151-5p	-	17	17	-	TAAAATGGCATCCTCTCTTTC	-
	novel_mir_91	Chr6:28330745:28330822:-	ACTATAGCTCTGCATGGGATTGGGATGTACCGGGACATTTAAGAATGATGGTTCGTTGGATTCCGCAAGTCTATCAGG	.((((((((.(((..((((((..((((.((((...((((....)))).)))).)))).))))))))))).)))).)).	-18.4	-	B1-m0152-3p	67	-	67	-	ATGGTTCGTTGGATTCCGCAA
	novel_mir_92	Chr6:28336875:28337042:-	GGGCATGAGAAGTGTCAGGATGTGCCGAAATGGAACTCTGATCTGATGCTACCATGGAGCTGGTCACGGACCATACGTGAGTGAGCCCTTGGCGAGTACGTTCATGGCTGGCGCTTGATTCATCGTTTCTTGGGAGGATCATGTCGGCATCCATGGCGCGATGGTGGC	.(.(((.(...(((((((((..((((((.((((..((((((((...(((((((((((((((.((((.((.((((......))).).)).)))).)))...))))))).)))))...))))............))))..)))).))))))))).))))))..).))).)	-60	-	B1-m0153-3p	428	-	408	-	ATCATGTCGGCATCCATGGCG
	novel_mir_246	Chr6:28340672:28340788:-	CGGGACATCCCATTGGAGCAGTGAAGTTTGGCAATTTTCAAGCTTGAAAGGAGAAAATTGGTGATTTGAAATTGGATTTGAATTCAAACTTTATGTTTGAACTCAGGGAAATTTGGG	(.(((..((((.((.(((((.(((((((((.((((((((...((....))..))))))))..((((((((......)))))))))))))))))))))).))....))))..))).).	-25.4	B1-m0154-5p	-	6	6	-	CATTGGAGCAGTGAAGTTTGG	-
	novel_mir_93	Chr7:5730180:5730396:+	AAACTCCCGCTGCATCTCATGTTCTATCCTGATCCTCAATCCAACACCACTTTACTAAGCAAAAGTTATATGCGCGAAAATTGTTGTGTTTACGATACACAAAATTGCAAAACAAAGTGCTGCTGAATTCTATAAGAATGGGAAGCATTCAGAAAGCAAGAGTTTTTCCAAGAGAGGCAGTACTGCAGTAGAACAAGAGCATAGCAGCTTGGCTCCA	.....((.((((((((((.(((((((..(((.................(((((........))))).......((((...((((.(((((...)))))))))..)))).......(((((((((...((((.......(((((((.((((.........))))))))))))))).))))))))).)))))))))).))).)).)))))..)).....	-50.6	-	B1-m0155-3p	285	-	284	-	AGTAGAACAAGAGCATAGCAG
	novel_mir_94	Chr7:6434033:6434328:+	TATGTAGCCAATGTAAGAGGTCGGTCATGATTCTTGAAGCCCTGCGGTACTTCCTATTGAAAGAGATGGAGGCGGTATGTATAGCTGATTGATCCGTTTGTTGCCATAGGAGCAAACTTCTCTTTATCCCCCTTGACTCTTCAAACACCTTTGATAAGGTCTTTGCTAGAAGACTAGAGCACTAGACAAAAAAACAATGGGATTCACATGTTCTTGGTAGTTTGGCCAATTTGGTGTCTTCTCGGCATAGCATGGGCGACCTTCGGCATTGAAAATACTTTCTTGGTGCTTGCAGC	..((((((((((((..(((((((.(((((......((((((....))..))))...(((((.(((.(.((((.((.(((...((..(.(((.(((...((....))..))).))).)..))...))).)))))).)))))))))..(((((....)))))((.(((((((((((((((...((((((..((.((((.((.......)))))).))....))))))....))))..))))))).)))).))))))).)))))))..)))))).....(((.....))))).))))..	-73.9	B1-m0156-5p	-	460	459	-	ATGTAAGAGGTCGGTCATGAT	-
	novel_mir_247	Chr7:6439139:6439305:+	AAAAGAAAAAAGGTTATGGAATGAAGTACGCCGCTTATCTTTTTGTTCGGAATGTTTCTAAGCTCTGAACTGGTGCTGGAAAACCATGGTAGCTTCTGTTTCTTTGTTAGTAGTTCTCTGTAGTCCTTTCTTGTACAAGACTTTGCTCCTGTTCTAGGCTTTCTTTC	.(((((((((((((((((((..(((.(((...............(((((((..(((....))))))))))((((........)))).((.(((....))).))......))).)))))))))).)))))((((.(((.((......)).)))..)))).))))))).	-29	B1-m0157-5p	-	7	7	-	AGGTTATGGAATGAAGTACGC	-
	novel_mir_248	Chr7:6910207:6910372:+	GCTTCGATGATCCTATTATCTATCCTCTCTTTCATTTCTTGCCTCCCAGTGTAAGGCAATGTGATCAGCACATGCCATGGGGATCCCAGCTTCGTTGCTGACGAGTGCGCAGGTAACCAAATAGGCAATTAGCTACTGTGGATTTGAGAAGGAGAGATATTGAATT	..(((((((..................((((((.(((((((..((((((((...((((.((((.....)))))))).((((...))))(((..((((((......(((....)))........)))))).)))))))).)))..))))))))))))))))))))..	-43.3	-	B1-m0158-3p	9	-	9	-	CTGTGGATTTGAGAAGGAGAG
	novel_mir_249	Chr7:7048727:7048792:+	ATGTCGGAACATGAGAGTTTGGTTGTTCTGTGGGACAGGACACATCAGCACCTTATGTTTAGATTC	..(((.(((((((((.(((((((((((((((...)))))))).))))).))))))))))).)))..	-24.2	B1-m0159-5p	-	16	16	-	ATGAGAGTTTGGTTGTTCTGT	-
	novel_mir_96	Chr7:8601158:8601338:+	GCTTCAGTTCCAGAAGCTGAACTGAATGCACCACATCTTTTAGTATTTTTTCTTCAGATCTTTCTGATAGACGTAATAAACTGGCGTCTCTGTAACACCTGAGCATAATAAGGTTTCATGTGATTTAGCTTGTGTAGCAAAAAGGATTATGCATGCATAGTGCAGTTTTCGGTCTGTAAGA	.((((((..((.(((((((.((((.(((((....(((((((............(((((....))))).((((((.........)))))).(((.(((((((((((((...........)))).)))))...)))).))).)))))))..)))))...)))).))))))).)).))).))).	-43.1	B1-m0160-5p	-	13	13	-	CAGAAGCTGAACTGAATGCAC	-
	novel_mir_234	Chr7:14769077:14769387:+	ACTTTCGCGTAATGGTTGTGCGAGATCGACGGTATATTTTTTAAAAAGTTTTAAATTCCGAATATTTCTAAAAATAAAATGAATGAACAGTATATTTCTAAATTTAATTCGAAGTCAACATGACCTTATTAAGCTTTTACCTCGTAGTGGCGATACTGATGTCACGGCCGGGTAACAAGAAAAACAAATACACTACTGTGTTATCTTTTATTGGAAAATTCATTTGGTATCTTGTATTCAATCATATTGTCAGCAAACTGGTTCACTAAAAGAATCGGACCTCATCTTTTCGCTCATCATTATGCTTATCA	......((((((((((.(.((((((..((.(((.(((((((..(((.((((........)))).)))..)))))))((((((((...(((((.....................((((...)))).........(((((((((.((.((((((.......)))))).)).)))))).)))..........((((....)))).......)))))....))))))))......((((...((((...))))...)))).(((((((.......))))))))))))....)))))).)))))))))))......	-61.5	B1-m0161-5p	-	8	8	-	AATGGTTGTGCGAGATCGACGGT	-
	novel_mir_97	Chr7:18555300:18555550:+	CCGTCGTCCTCGTCGTGGCCGCCCCCGCCTCCCCCGCCGCCGGACGCCTCGCAGGACCCCGATCTCGCGCCGCGGGAGGCCACCACCCCGCCGGCCTCCTCGTCCTCGCCGTCGCCGCGCGCGTCGGCCAAGGCGAGGGCGTCCGCCGCGGCGGCGGACGGGCTCGCCTCCGGGGTCGCGGCGCTCAGCTTCGAGGAGCCGCTCGGCGCCGGCGCCGGGGAGGACGGGTACGACTACGGCAAGGGCGACTT	..((((((((.(((((((.((..(((((((((((.((.(((((.((((..((.((..(((((.((.(((((((((((((((...........))))))).((((((((((...(((((....).))))...))))))))))...(((.(((.(((((......))))).))).)))))))))))..))..))).))..))))..))))))))))).))))))).))))..)).))))))).))))))))..	-163.7	-	B1-m0162-3p	7	-	7	-	AGGACGGGTACGACTACGGCA
	novel_mir_68	Chr7:538371:538488:-	GTGATATTCCCCTGTGACATTCTCGGTGACATTGAGTCACTGACATGTGGGTCCAGACACATGTGGGTCCCACATGTCAGTGACTCAATGTCACTGAGAATGTCACGGGGGAATGTCA	.((((((((((((((((((((((((((((((((((((((((((((((((((((((........)))).))))))))))))))))))))))))))))))))))))))))))))))))))	-102.7	-	B1-m0163-3p	99	-	99	-	ATGTCACTGAGAATGTCACGG
	novel_mir_250	Chr7:6367378:6367489:-	TTTTGACATAACATGGAAGGACTAGTTTGCTAGACGAACAAATACTAGGACAGAATCTTCATTCCTGATGCATCCTAACCCTAACGCGCATTGGTTTTTGCATATGAACATA	......((((...((.((((((((((.((((((............(((((..((....))..))))).............)))..))).)))))))))).))))))......	-18.4	B1-m0164-5p	-	8	8	-	ACATGGAAGGACTAGTTTGCT	-
	novel_mir_98	Chr7:6418469:6418621:-	ACCAACTTGCACGCATTTAGAGATCCTTCATTGGACATGTACGTGAGCATGAGCACGAGCACGAGATTCATCATGTGGCAGAGCACGAGTAAGCTACCCCAATGGATGTAGTCGCAAGCTACCCAATCTAGGACTGGCAGCATGTAAACCTGG	.(((..(((((.((..((((...((((..(((((.(((((......)))))......(((....((((((((...(((...(((........)))...)))...)))).))))....)))..)))))..))))))))..)).)))))...)))	-37	-	B1-m0165-3p	535	-	524	-	CCAATCTAGGACTGGCAGCAT
	novel_mir_251	Chr7:6722749:6722837:-	GCTCCCTGTGTAGGGACAGAGGCCATGGGATATGATGCTATTGTGCATATTCTTGAATTGGTTCCCTGTGCCTCCTAATCCTACGAGCT	((((.....((((((...(((((((.((((....((((......))))..............)))))).)))))....)))))))))).	-28.8	B1-m0166-5p	-	7	7	-	TAGGGACAGAGGCCATGGGAT	-
	novel_mir_252	Chr7:6979761:6979855:-	TGCATTGCTGGATCAACCTACCGTGCCCTCTTCCTTGGCTGTTGGCCGTCTTCAGATCCCATAGAAAATGAGACGCTAGCTAGTTTATAGCATGT	.((((.(..((.....))..).))))..........((((((((((.((((.((..((.....))...)))))))))))).))))..........	-19	-	B1-m0167-3p	8	-	7	-	AAAATGAGACGCTAGCTAGTT
	novel_mir_253	Chr7:13733265:13733347:-	AAGCACATCACCAGCGGTGAGGAATAGGCAAAGAGCTTCGTGCAAATGCGTATATCCTTGTTCAGCTCAGTGACTTGGGGCAC	..((.((((((.(((((.((((((((.(((....((.....))...))).))).)))))..)).)))..))))..))..))..	-19.9	B1-m0168-5p	-	10	9	-	CCAGCGGTGAGGAATAGGCAA	-
	novel_mir_102	Chr7:18540269:18540523:-	TGAAACGGAGAGAGTAGATTTTAGGAAGGCAGCACCATACCTGCTTGGGAGCGTGGAGTTGGAAGAGGCGCACGGGGGGGGGGGGGGGGTCGAAGATGGGCATAAGCCCCTGCGACAATGGCCATCTCGCCCACGCCGGCCACCACCACCTCCGATTCCAAGCTCACCGTTGACTTCTTCATCCTCCCCTCCAACTCCAAGCAGGTATGGCGCAGCCTTCTTGCTGCTTTCCTAAAATCTACTCTCTCCGTTTCT	.((((((((((((((((((((((((((((((((((((((((((((((((((.(.((((...(((((((((.(((((((((((((((((((((..(.(((((....(((..((...))..)))......))))))..))))).)).)).))))).........))).)))))).)))))))...)))))))).....))))))))))))))...........))))))))))))))))))))))))))))))))).	-141.6	B1-m0169-5p	-	7	7	-	AGAGTAGATTTTAGGAAGGCA	-
	novel_mir_254	Chr8:2439083:2439167:+	TGGTGTTAAAAGTACAAAGGATACATGCGCATAAAAGAGAGCATAACCATGCCCTTTGTATGTGTCCGTGCTCTGTTAATTTCAG	(((.(((((.(((((...(((((((((((.......(((.((((....)))).)))))))))))))))))))...))))).))).	-24.8	B1-m0170-5p	-	5	5	-	AGTACAAAGGATACATGCGCA	-
	novel_mir_104	Chr8:2462643:2462732:+	CTGGAGCAAACAACTGACCAATGAATGACTACGATAACGCCAATTGTGACTTCCGTCATGTTGCTTCATGGTTCAGTTTGGGTTCCTAGA	(((((((....(((((((((.((((((((................(((((....))))))))).))))))).))))))...))))).)).	-23.3	B1-m0171-5p	-	14	14	-	CAACTGACCAATGAATGACTA	-
	novel_mir_105	Chr8:2685181:2685356:+	TGTGCTGTGATTGACGAAACGTTGGGTGTGCTTTATGGATCAAATCGAGTGTTAATCCCCACTTGCTTCGGCTGGAATTGCAACTTGGCCACCAAGGACATTGAGCAAGAACGTTTACTTGTTCTGGTCCATGAACACATACTCCAAGCCATGCAGTGTTCGTCTCGATCTGCAAC	..(((...((((((((((.(((((.(((.(((((((((((((...((((((........)))))).....((.......))..(((((...)))))......(((((((........)))))))))))))))))............)))))).)))))))))))..)))).)))..	-50.6	B1-m0172-5p	-	8	7	-	TTGACGAAACGTTGGGTGTGC	-
	novel_mir_106	Chr8:17177018:17177258:+	GGTGTGCTAACAATATTGGATTACAGACTTCTGTCAAATGTGTGGTTTTAAAAAAATTAAGGTATTAAAACAATTTAATAACAATAAGTTTAGTGTTCTTTTGCTACTTCAGGGTAATGCATAAATATGATATTCTATGTTTTACCTTATAACGAATAGATTCTAATAATTGGTTTATTATCTGTACTTAGGATTACTCCTAACGTTTAGGAGTTTAATTGATCCAGTTTGTTGAGATTTG	.......((((((.(((((((((.(((((((((...(((((.(((((((...)))))))(((((.(((((.(((.....(((.....)))....))).))))).))))).(((((((.(((((((((...)))).))))).))))))).......((((((..(((........)))..))))))...(((((....)))))))))))))))))))...))))))))))))))).......	-47.9	B1-m0173-5p	-	10	10	-	CAATATTGGATTACAGACTTC	-
	novel_mir_107	Chr8:18588098:18588212:+	CAACTTGACAGCGATCAACCCAGTTCTCTGGCACACTGCCCCCGGTCGTTGGATGCTGGCCTCGTCAATGACCTGATTAATATACAGTAGAGCTGGGACGTTCGATATGCTTCTT	...........(((.(..(((((((((((((((...)))....((((((((.(((.......)))))))))))...........))).)))))))))..).)))...........	-32	-	B1-m0174-3p	34	-	33	-	CAGTAGAGCTGGGACGTTCGA
	novel_mir_108	Chr8:18672868:18672961:+	TGGATCGGCCACACAGAGTCGCGCAGTGGTACACTTTGGCCGGTCGAATGCCCTCGCCATTTTCTCTTGTGGTTGACTTTTTGTGTTCGATCCT	.(((((((.((((.((((((((((((.((.......((((.(((.....)))...))))....)).)))))..))))))).)))).))))))).	-33.3	B1-m0175-5p	-	360	358	-	ACACAGAGTCGCGCAGTGGTA	-
	novel_mir_109	Chr8:2458805:2458892:-	TCAAACTGATCCAGGGAATTGAGTGTATGGCGGCTAAGCTCATTGTAGCCACTACGGCCCTACATGTCAGCTCCATGGGTAGTAGGAA	((..(((.(((((.(((.(((((((((.((((((((.........)))))......))).))))).)))).))).))))))))..)).	-28.3	B1-m0176-5p	-	44	43	-	CCAGGGAATTGAGTGTATGGC	-
	novel_mir_255	Chr8:2462315:2462429:-	CTCAAGGACTATAAAATTACTCGAGACATGCTTTGAGCCTTTGACTCATCTTTTTTACTAGTAAAATCATCTTGGATTCTTGATTCTTGAGTGGGTTTGTATGTTGCCTTGGTGA	.((((((((((((((.((((((((((.((.....(((((..(((.....((........)).....)))....)).)))...)))))))))))).)))))).))..))))))...	-23.4	B1-m0177-5p	-	7	7	-	ATAAAATTACTCGAGACATGC	-
	novel_mir_256	Chr8:4403867:4403960:-	GTCATTCAAAGTGAGGATTAGAGGGAACTGAATCACACCCATCTGGAACAAAAGATGGATGGTTCAGTTTCTTCTAATATCTCACATTGAATGG	.((((((((.(((((((((((((((((((((((((...((((((........)))))).))))))))))))))))))).)))))).))))))))	-50.4	-	B1-m0178-3p	7	-	7	-	TTCAGTTTCTTCTAATATCTCA
	novel_mir_110	Chr8:5732641:5732915:-	ACTAGCTTTGTGATCTTTGTTCAGCTCTGGTGGCCAAACTCCCAACACAATCTTAGCAAGAGCCATCTAATATTTACTCCATGGCTATGATCACCAGCTTGACACTTCATTCATTGTAAATGCTATATAATTTGATGGTTCTGCATAGTTCAGGGGAATACATAATAAAAGGTCCCCACATCTATTTATTTAGAAAGAGAACTTGATAGAAACAGGATATTGGGAAAAAAAAACTAAGTGGTTGTGATCAAGAAGAACAGGAGGTGATGAATTAG	.((((.(((((.((((((((((..((.((((.((.....((((((......((..(((.((((((((((.(((((((...((((..(((((((......)))....)))))))).))))))).))........)))))))))))..))....(((((...............)))))...((((......)))).......((((.......))))...))))))......((((....)))))).))))))..))))).))))).)))))))))	-55.7	B1-m0179-5p	B1-m0179-3p	21	2	18	CTTTGTTCAGCTCTGGTGGCC	TGATCAAGAAGAACAGGAGGT
	novel_mir_257	Chr8:16855096:16855264:-	CCTTTGTTTCATGAATCTATGAACTGGCTGTTGTATGAATTGGTTGATGTCTCATAGGTTTAATAGGGTAACCCTTTGCTCCATTGGATAACCATTTATTTAATAAAACCATCAAGGGTTGCCCCCTACTAAACCATGGGCCAGAGTGGTCATGTGGAATGGTTTAGGT	...........(((((((((((((.(((((.(......).)))))...)).)))))))))))...(((((((((((((....(((((((((....))))))))).....))..)))))))))))(((((((..((((.(((((...)))))..))))..))))..))).	-47.2	B1-m0180-5p	-	29	29	-	ATGAATCTATGAACTGGCTGT	-
	novel_mir_258	Chr8:17118328:17118544:-	ACTTCTTCAGTAATCAGTAGGATCAGCATGTTCACCAGTTCAGCAAGTAGCATCAGCAGGCAAATTATTTTGAGTGTTCCTAGACATTAACCGCATAAATCCCACGAACAGCAGTGAGCCTGCCTGCAGCTTTGCGCAACTGCAGCTCTCATGGACGTCGCCGAGACTGTTCAAATGTGCGGTAGTGCTGCCATCTTTACTGCTTACAACTGATGTG	((.((....((((.(((((((((((((((.....((.(((..((.....))...))).))((((....))))((((((....)))))).((((((((.............((((.....))))((((((..........))))))......((((((((.....))).)))))..)))))))).))))))..))).)))))).))))....)).)).	-55.5	B1-m0181-5p	-	8	7	-	TAATCAGTAGGATCAGCATGT	-
	novel_mir_112	Chr8:17584048:17584173:-	GCCAACTAGCGTAGCGCTGAATGCACGTTGGCACACCAACTCAGACTCCCATCCGTGGTGGCACGGCATATAGCGCTAGTTGACGTGGCGCTGAGGTGTCTAAATTCAGCGTCATACGATTTGGCG	(((((.((((.((((((((.((((.(((..((.(((((.....(.....).....)))))))))))))).))))))))))))..(((((((((((.........))))))))))).....))))).	-49.5	B1-m0182-5p	B1-m0182-3p	25	10	15	GTAGCGCTGAATGCACGTTGGCA	CACGGCATATAGCGCTAGTT
	novel_mir_259	Chr9:6661317:6661467:+	GTCAGCAGAAGTACTATTTCTCCACATATCATCTGTCATGAAAGATTCATCTGTGGGTTAAGGTCTGCCTGTCGGACAAGGATTATCTATTGGTAAAGCTCTAGATATCATAGTCAGACAATATGTCGGTAAACGGTATGTCTGTCGTGAA	.((((((((.(((((.(((..((((((((..((((.(((((...((((.(((((((((........))))).))))...))))((((((..(......)..)))))))))).).))))..)))))).)).))).))))).)))))..))).	-38.5	-	B1-m0183-3p	12	-	11	-	ATATGTCGGTAAACGGTATGT
	novel_mir_260	Chr9:6757423:6757641:+	TACACATTGTCTACATCAAGATGAACTCTGGTGTCCCCCGTGCTCTCCTTCGCACACTTGCCCATTCTTGTTGGCAGTGTCAAATATCGAACCCAGATAGTTTACACCACAGAAGTGAGAATTTATCCTCGGCTATACCTCTACATGGGTTAGCTGCTGCTCCTTCCGATGGACAATAGGACAATAACATTGGAGATCACAAGTTGTAGATAGTACTTT	.....((((((((((.(..(.(((.(((((((((.....((((........))))...((((.((....)).))))((((....((((.......))))....))))(((....)))............((((((..((.......))..)))))).((.(((((((...)))....))))))...))))))))).))))..).)))))))))).....	-57.4	-	B1-m0184-3p	13	-	12	-	ATTGGAGATCACAAGTTGTAG
	novel_mir_115	Chr9:6762900:6763017:+	TTTTCAATCTAAAGACTGATAAGTAGATCGAGCAGATAGATGTAGTATTAGCTTCCACGTGTCACCTCCTCTACTCTTGAACTATATATGAGATCGTTGGCGGTAACTAGATAGAGCT	........((((.((((.(((.((((.(((((.((.((((.(..((....((......))...))..).))))))))))).)))).))).)).)).))))..................	-20.6	B1-m0185-5p	-	89	87	-	AAAGACTGATAAGTAGATCGA	-
	novel_mir_261	Chr9:8918957:8919037:+	GGACAGCTTTATATAGTTGATCTGGGCTTGTCGTAATATATAACTATCGACATTACCAAGGTAGCGACTATGCAGTGGTCG	.(((.(((...((((((((((((((...(((((..............)))))...)).))))..)))))))).))).))).	-22.1	B1-m0186-5p	-	5	5	-	ATATAGTTGATCTGGGCTTGT	-
	novel_mir_116	Chr9:9021971:9022217:+	CCGCCAGAGTTGTAGCATGTAGGGAAGGTTAAATCCATTTGGGTATGATGAAGTGTTATTCGAAAGGCTAGACGATTGGCAGCACATCTTGCTGCTAATTTGCCATTTTTTAGATAAAAAAGCCAAGCCTTCTAAAAGGAATGTTTGATGTACCTAGAGAAGTCACTACCAAACAGAAGAATTTGACTGTAATAACAGCTGCAGATTGATCCTTAAAATTCTGTAAAAGTGCTCAACGAAGTGGTGA	.(((((..((((.(((((.((.((((..(((((((.((((((((((((((((......)))....(((.....(((((((((((.....))))))))))).))).((((((((.((...((((....((((....))))...))))....)).)))))))))))).))))...((((....)))).((((....))))...))))).)))..))))..)))).))...)))))))))....))))).	-62.1	B1-m0187-5p	-	391	379	-	TGTAGCATGTAGGGAAGGTTA	-
	novel_mir_118	Chr9:9156861:9157189:+	TGAAGCTTTGATGTGAAAGTTTGGGGGTGTTGTGGACAAAGAGATGAAAGAGATTTGGGGGTGCAAAGTTCCTATTGCTCTTGAAGAGCAATTTTACGGTCCTTGAGGAGGTACCATGAGGTACCATTTTTTCTATTGTAAATTTGGTATCTCTTGGTACCTAGGTACTATGAGGTACCATGAGGTACCAAATTTTACACTAAAAATTTAGTACCTCATGGTATCTCCTCAAGGATCGTAGAATTGCTCTCCTTTGAAAGTCAAGCATTTCCTGTTTTTGGCTGGGAGAGGGAGAATACCTTGTGCTGAACTCTTAGTTCAGAGAAATT	.....((((((..(((.((((((((((((((.(..............(((((...((((((.......))))))...)))))..((((((((((((((((((((((((((((((((((((((((.(..((((.((.(((((((((((((((((.((((((((..........)))))))).))))))))))).)))))).))))))..).))))))))))))))))))))))))))))))))))))))))(((((...(((((((((.....)))..))))))...))))).).)))))))....))))))).)))..)))))).....	-147.6	B1-m0188-5p	-	37	37	-	ATGTGAAAGTTTGGGGGTGTT	-
	novel_mir_119	Chr9:9324265:9324429:+	TTGGCTATTACAGAGAAATCCAAATCGCGTGCTTTTCTAGTGAAAGACAGGTATTATTCACATCATATTCTTTTTCGTGTGTTCATACTCGTCAGTGTTTAACATGTTTTTCCTTTTTTTTTACCGTGCTGATATGAGGTTTGCATTTTATTCTGTAATTTCTCT	..((..(((((((((((((.((((((.((((........((((((((.(((........................(((((....(((((....)))))...))))).....)))..))))))))........)))).)))))).)))))..))))))))..))..	-29.2	B1-m0189-5p	-	108	108	-	CAGAGAAATCCAAATCGCGTG	-
	novel_mir_163	Chr9:19261805:19261888:+	ATACTCCCTCCGTCCCAAAATATAGTTGCCTTTGTAGTTCAAACAAAGGTACAAAGGTAGCTATATTTCGGGACAGAAGGAGTA	.((((((.((.(((((.(((((((((((((((((((.((.......)).))))))))))))))))))).))))).)).))))))	-45.4	-	B1-m0190-3p	9	-	9	-	AAGGTAGCTATATTTCGGGAC
	novel_mir_262	Chr9:6627701:6627802:-	ACCTCGTGTTGTGACGTGTGCTGTGGGAGGCAGATTCAGGGAAGCTTGTAGAACTATGTCAACCTCGACCAAATTACAGCGCTATCCCATAAGAGAAGAGAG	..(((...(((((..(((((((((((((((..(((.((((....)))).........)))..)))).......))))))))).))..))))).....)))..	-22.4	-	B1-m0191-3p	6	-	6	-	AATTACAGCGCTATCCCATAA
	novel_mir_263	Chr9:8884285:8884594:-	TTTCGGTGCAAGTTGATCGCGAGAGGATGTTCATGTGTAAATTTGGCAAGGGCAACTTCCACTTGTACTACAAACCCTCTTATCTCAGAAGATATATAAGATTGATCTCCCACACCACACCACAGCACTAGACTCGAGCACCGCAAAGCGTGCATCCTACTACTCATCGTCCTAGATGAGACTCCCCTGATGTTGTGCAGTTTACAATTGTGCCACTGACATGGGGCCCACATGTCAGTCGCACAACTGCAGGCTGCACAAAGTCGGAGGATCTGTTTCCCATCATCTTTGTGGTTAAGCAACGCCGTGC	...(((((....((((((((((((.((((....((((((....(((.(((.....))))))....))).))).....((((((.((....))...))))))(((((((.....................))).))))((((.((...)))))).........((((((......))))))..(((.(((((.(((((((((((.((.((((((.(((((((((.......))))))))).)))))).)).))))))))))).))))).))).........)))).)).))))))))))....)))))...	-99	B1-m0192-5p	-	21	20	-	AGTTGATCGCGAGAGGATGTT	-
	novel_mir_75	Chr9:18868646:18868929:-	CGCGGTCGCTGCTCGCCGTCTCCGACTACTTCCACCGCCTCCGCACCCTCAGCTCCCTCTGGGTCACCCGCCCCAGGCACCCGCCTCACGACCACCAGCCGCCGCCGCACTCCGCCGCCCCCCACACCTGAGATCACCGCCGCCGGCAACGCATGCAAACACCGTAGCTCTTAGCTAGCAGCTTAGAGATATCGAGAGATCAGAAATTAAGCGATCGATCGAGAGAGGACGACGACTGTGAAACCCCCCATGGAATGGATGGATGGATGGATGGATGAACCGAT	..((((.....((..(((((((((.(((.(((((.........(((..((..(((((((.((((.....)))).((((....))))...........((((.((.((..(((.................))).....)).)).))))......(((.......))).((((.((((...)))).))))...((((..((((...........))))..))))))).))).)..))..)))..........)))))))).))))..)))))..))....))))..	-68.1	-	B1-m0193-3p	17	-	16	-	AATGGATGGATGGATGGATGG

## Sheet: B2
	miRNA ID	Location	miRNA precursor	structure	MFE	Id(5p)	Id(3p)	count	count(5p)	count(3p)	mature miRNA (5p)	mature miRNA (3p)
	novel_mir_2	Chr10:14220313:14220408:-	AGACATCTGGATATCACTTCTGATGTATTCCTTGGTGTAAGCTACTGAGATTTGGTATGGTAGTTTCTGTGGCACTTGCACAAGGACCAGTTTTAT	......((((((((((....))))))..((((((.((((((((((.((((((.........)))))).)))))..)))))))))))))))......	-28.1	-	B2-m0001-3p	134	-	134	-	TCTGTGGCACTTGCACAAGGA
	novel_mir_167	Chr11:23054542:23054867:+	GTACGTTCTTCTGGCCATGTGAGAGAAGCATGAGAGTTAAGAACAGCGACAACTGAAGGAGAGGAAAGAATGCTCTGTGATCACTCTAGCTCAGATGCAGTAGTTCCTGATACCTCCAAAGCCTGTTGCTTCAGACAATTGGGTGATAGGCAAGACATTCAGAAAGTATTACTATCTTCTTCGTTCTTTGTAGTCTGCACATGCACCAGACTTCATAGCTACAGCTCTAGGGGAAAGATCAATATCTCGACCACGTTATGTTATAGCTAGCTCTGTTCCAATATTATTTTCTTCATTACTTAGATTGTGGCATATGTGGAGGTACA	((((.(((.(((((.(((((((((...(((.(((((..((((((((......)))..(((((((((....(((((((.(..........).)))).)))....))))).....))))...((((((((((.((......))))))))))))..........((.(((...))).)))))))..))))))))..))).))))))..)))))...(((((((((((.((((((((((((...(((((...(((...((((.((....))))))...)))...))))).))))))......))))))))))))).)))).))).)))).	-82	B2-m0002-5p	-	10	9	-	CTGGCCATGTGAGAGAAGCAT	-
	novel_mir_264	Chr11:24335705:24335800:+	AGCTGTAAGGTAACTGCGATGTTGCCCATGATTCACTTTGTCAGGCTGATCCATGCAGCCGGCGGAGGAGTCAGTCGGCGACGTCGAGCAATCGGC	.((((....(...((.((((((((((..((((((.(((((((.(((((.......))))))))))))))))))...)))))))))))))...))))	-43.1	-	B2-m0003-3p	8	-	7	-	AGGAGTCAGTCGGCGACGTCG
	novel_mir_265	Chr11:24806423:24806711:+	ATCGGCTGCACGGTGGCGTGAGGGCTGAGTTGTGCTGCTCTGCCATTGGCAGCTCGCGAGACAGTTGCGTGCGCAGCTAGTACCGCGAGATGCGAGTGGCTCTGCGTATGGAAATTGCTACGCAGATACCAATCAAACTGTCCGACTCCGACTCATGTACGACTGAATTTGATCGAATGGTTGTAAACGGCTACAGTGCATATATATTGCTATTCGGTGATTGATATATGGTTGCATGTCTCTAGTTTTAAATAAGTTGTACAACTCGATCGTACGTATAGCAGTATTC	....(((((......(((((.((..((((((((((.(((..((((((.(((.((((((..((((((((....)))))).))..)))))).))).))))))((((((((.(.......)))))))))........((((((...(((..((((.(((((((((.......(.((((((((((.(((....((......)).....))).)))))))))).)))).))))))))))...)))..))))))......))).)))))))))).)).)))))...)))))....	-102	-	B2-m0004-3p	5	-	5	-	GTACAACTCGATCGTACGTAT
	novel_mir_266	Chr11:24918909:24919175:+	ATACATATGGTGTGATTGTGAGACGTTGTACCAACAGAGCTCAGTGGTTGTCGTAGTCTTGTTCACGATGCCTCCTAGACCTAGCTACCATGTGTTGAGTAAGGTAAGGATGTAAAATTTTCAGAAGGATTTCAATTCTCAGCAACCGTAAATTTGTGATCGATCAAAGCTTGTCCTTGTTGCTAATTGAGAGAGTGAGTTCATGAGAATAATAGAAGTACACGCGTACTCCCTCCGTCACATAATATAAGAGATTTTGGGTGTATT	((((((...(((((((.(.((((((((((((.(((((.(((..(.......)..))).))))).....(((.((((..((((.(((..((.....))))).)))).)))).)))..(((((((...((((((..((((((((((((.((((.((((........))))..))).)...))))))......)))))))))))).))))))).......))))).)))).)))...).))))))).................)))))).	-54.8	B2-m0005-5p	-	7	6	-	TGTGATTGTGAGACGTTGTAC	-
	novel_mir_6	Chr11:26390432:26390548:+	AGGATCTTTTTGATGCTGTCTAACTAACTCGTTTCATGTTTCATGTTTTATCTTAATTGTAGCTGACATAAGAGCTCAATGTTGTGCAACTTGGTTTCGTAGCGTCAAAGATACACA	......((((((((((((...((((((...(((.((((.................((((.((((........))))))))..)))).)))))))))...))))))))))))......	-23.5	-	B2-m0006-3p	12	-	12	-	CAACTTGGTTTCGTAGCGTCA
	novel_mir_8	Chr11:10007473:10007796:-	AAATCAGAAGTACCCACGTTAGCATTCATCAGGGATCACACAAAAACTTCCAAGTATTAACTGCACATTAACTTGGGACTTGGGAGCAGTACATTACATATACCAAACCATCCGTCCATCGGAATAGCACTGTGATGACCTAAAAATTAGAACATGGACCACATAGGAGTAGCTTATACAAGGCAAAACAGTAACGCAAAATGCTAGCATCTTCAGTAATTCAAGCATGCACGCATGCATGAGGAATCAGTAACATTTCTGATTGGTGTCGGCATTCTAATAGGGTTTAGGAGACATGGGGAATTTAGCGTGCACTTGTGGTAG	..((((.((((...((((((((.((((.(((.(..((.........(((((((((.((((.(........).)))).)))))))))........................((((.....))))...(((((((..((.(((.................((.....)).(((.....))).)))))..)))))...))..((((((.(((((........((((.(((((....))))).)))).((((((........))))))))))).))))))((((......))))))..).))).)))))))))))).)))).))))..	-74.1	-	B2-m0007-3p	10	-	10	-	ACATGGGGAATTTAGCGTGCA
	novel_mir_9	Chr11:12147701:12147994:-	GTTGGTCCAATTAATCGTCGATCAGGCACAATTAATTGTCCGATCAGAGCACCTATCGATCACCTTTTGAACAATTCTTAGGGTTTAGCACATGTGAATATGTGCTACTACTGCTGGTTGCTTTATACTAGGGCAAGTGACCATCTTGCCATCAATTATTAGTGCTGTGATTGCTTTATACTATGCACTATATAGAATATAGGTTCTAGTATTCATAGTACTGATCAGGTCGACTAATCGAGGCTGATCGACGATTAATTTTCCTGGTCGGTCCCTTGGTGATCAGGATCAATC	........(((((((((((((((((.(.(.((((.(((.((((((.((.......))))))(((((..(((...)))..))))).(((((((((....)))))))))......(((((........)))))((((((.......)))))).......(((((((((((((.((((..(..(((((..((....))..)))))..)..)))).)))))))))))))..)).))).)))).).).))))))))))))))))).(((((((((.(.....).)))))))))......	-102.6	B2-m0008-5p	-	57	57	-	TTAATCGTCGATCAGGCACAA	-
	novel_mir_10	Chr11:16493226:16493515:-	ACCGGCACCGATTTGTGTGTCTGTAGCGGTGTGTGACAATTACATCATGGATGAGCTCGCTTGTTCCCGTGAAATCGTCACCGAGTTCGCGCAGCATGTACGCGGACTCTGCCCAGAAATCTACTACCAACGAGAACTCGTTGCAAGTTCGTTTTCTGCGCACGCAAGTCATTTACTAATTGTTATATTTTGGGACGAAAGGTATTTTGGGACGGAGGGAGTAGTAGATATACGATTTTTATTAAAACTGTGTTCAGTACAGACTGACAGGTACACACATTCACTAATTA	.........(((.(((((((((((..((((.((((.........((((((..((((......))))))))))..(((((.(((((((((((.........)))))))))(((.((((((...(((..((((((....))))))..)))....)))))).))).((((............))))........)))))))...........(((((.((....(((((((.........)))))))...)).)))))..)))).))))))))))))))).))).........	-79.7	-	B2-m0009-3p	37	-	37	-	CAGACTGACAGGTACACACAT
	novel_mir_171	Chr11:19402805:19402951:-	CTCTATCTATAAGTGGAATAGAATAACCCGGTTGAAGTGTAATGATCATATATTTTGTAATGCATTGTATGTCATTGATTCTTTCCCAATAAATGAAAACTTTTTCTGTAAATACTGCGTATTTGATTCCATTATCATATGATAATA	...(((((((.((((((((.(((((.(.((((.((((.(((((((.((((((...(((...))).))))))))))).)).))))..........((((....)))).......)))).)))))).))))))))...))).))))...	-23.2	B2-m0010-5p	-	19	19	-	AAGTGGAATAGAATAACCCGGT	-
	novel_mir_12	Chr11:24920007:24920082:-	AAGCATGATCAATGGGATTGAGGGGTACCAGGAAAGAACACCTTCCTAGATTTCTCAGAACGGTTGTTGTTCTGCT	.((((.(((((((.(..(((((((((.(.(((((........))))).))))))))))..).))))..))).))))	-22.2	-	B2-m0011-3p	49	-	48	-	CTAGATTTCTCAGAACGGTTG
	novel_mir_13	Chr12:2441355:2441614:+	GCCCGCGGCGGTGGGGCGGCGGTGGTGGCGGCGAAGGTGATGGACAGGAAGGAGCTGGCCGGGAGGAACAAGGAAGGGCGGGCGAGAACCGAGAGGGAGATCCTCGAGGCCGTCGACCACCCCTTCCTCCCGCGCCTCTACGGCGTGGCCGAGGGGGATCGCTGGTCCTGCCTCCTCACCGAGTTCTGCCCCGGCGGCGACCTCCACGTCCTCCGCCAGCGGCAGCCGCACCGCCGCTTCACCGAGTCCGCCGTCAGGTA	(((.((((((((((((((((((((.(((((.((..((((..((((.(((.(..((((.(((((.(((((.((((((((..(((((...((..((((.....))))..))...))).))..)))))))).(((((((.....)))))))..((((((((((...)))))).))))........)))))..)))))))))..).)))..))))..))))..)).).)))))))))))))))))))......)))))..))).	-149.5	B2-m0012-5p	-	9	9	-	GTGGGGCGGCGGTGGTGGCGG	-
	novel_mir_267	Chr12:6695540:6695834:+	GGCTCTTGGAGAAGGGATGTAGATTTAGGCTAGGAAGAAAAACATTGTTGGGAGGGAGAGATTAGACTAATTGATATTTATTGCCTAATTGATAATAGATATACCTAGATATAATCACATCCTTATATGGATGATACAACTTGACCCCTAAGTAAGAACTTAATCTTATCTTATCTCTAACTAACTAACTAACTAACTAACTTAATCTTATCTTATCTCTTACTAACTAATAATCTTATCTCTAACTTAATTGGTATAGGCTGCCTATAAGCCTCAGCCTTCCAGCCCAATGCCC	((((...(((((.((((((.(((((.(((.(((..((.........(((((.((..((((((.((((((....((((((((((.(.....).))))))))))...))).........(((((......)))))......((((.....))))(((((......)))))))).))))))..))..)))))...))..))).)))))))))))))).)))))................................(((..(((((.......)))))..)))....))))........	-62.6	B2-m0013-5p	-	8	8	-	GAAGGGATGTAGATTTAGGCT	-
	novel_mir_14	Chr12:14576174:14576431:+	CAGGACTAAAGATGATCTATTAAAAATCATGTAGTCTCGTTCTGCTTATAAACCGGGACTAAAAACCATCTTTAGTCCCGATTTTTATTGCAACCGGGACTATTATGGTTTTGGTCGACCGGGCAAAGATAATTTCTCCACTAGTGTAAGTAGCAATGGTACTTGAAGCATATAGCTAACAATCTCTTGCTGCATCCATTCTCATCTGACGAAGGACGATGAAAATGCTGAGCACGGACGAGCTAGGAGATTGTCCTA	.(((((..................((((.(.(((.(((((((((((((....((((((((((((.((((...((((((((..............))))))))..))))))))))))..))))....(((.....)))............(((((((.((...(((.(((.....)))..))).)).)))))))...((((.(((((...........))))).)))).)))))).)))))))))).).))))))))).	-75.9	-	B2-m0014-3p	8	-	8	-	CTGAGCACGGACGAGCTAGGA
	novel_mir_15	Chr12:15176235:15176307:+	TGCCATGGAACCTGCCTGATTCCTGTGCTGTATTGAATAAAAAGTTAGTAGAGGCTTGCAGGTGGAAATGGCG	.(((((...((((((..(...(((.(((((.(((........)))))))).))))..))))))....))))).	-26.5	-	B2-m0015-3p	23	-	23	-	AGTTAGTAGAGGCTTGCAGGT
	novel_mir_16	Chr12:15283679:15283799:+	AGCGTACAGTAGATGTGACTGTGTATTGCATGGTGGTTGGATTGGGAAGCATCAGGAGCTCTTATGGATGTCACCTTCCCTCCAAACCAATCCAGAGATCGCGGACAGGTTGCCATGTTGC	.(((.(((...(((.((.(((((.(((...(((((((((((..(((((((((((((....)))...))))....))))))))).)))))..)))..)))))))).)).)))....))))))	-36.5	-	B2-m0016-3p	51	-	50	-	TCCAGAGATCGCGGACAGGTT
	novel_mir_18	Chr12:17949899:17949979:+	GTCGTCGTCGAACCATCGCGTCGCGTCCCCGTGTCTGTCGAGCGAGATGGATGGATGGATGGATGGATGGGACCGGACGAG	.(((((......(((((.((((.(((((...((((((((......))))))))...)))))))))))))).....))))).	-34.8	-	B2-m0017-3p	11	-	11	-	ATGGATGGATGGATGGATGGG
	novel_mir_19	Chr12:18041571:18041660:+	CTAGATTGTAGATGAACTTCTGAAGGGCGGAACTAGAAATTGGCCAAGGCCTTAGCCCCGTCCATGGAAGTTTGGGTCCTACACAATAGA	(((...((((((((((((((((..((((((..((((.....(((....)))))))..)))))).)))))))))..)).)))))...))).	-30.2	B2-m0018-5p	-	13	13	-	GATGAACTTCTGAAGGGCGGA	-
	novel_mir_20	Chr12:18190759:18190899:+	TACATGTGTAGATCTAATGATGCGTTCATGCTAGTTTTCATCTGTAATGTCATGATTTATTTATGGAATAGATTAAATCATTATATGTCTATAATCTCAACACTTTGTTCCAGCTAGCAGAACTATCGCGTTCCACATGAA	..((((((..((.(...(((((.((((.((((((((......(((((((...((((((((((...))))))))))...))))))).............((((...))))..))))))))))))))))).).))))))))..	-31.8	-	B2-m0019-3p	45	-	45	-	CAGCTAGCAGAACTATCGCGT
	novel_mir_21	Chr12:18292723:18292803:+	TGATCTGGCACAAGGCAACCTGTGGAGGGCACAATATGTATTTCCAAAACATGTATTCTAGAGTTTGTCATGGCCAGCAAC	....(((((.((.(((((.((.(((((.(((.....((......)).....))).))))).)).))))).)))))))....	-23.9	B2-m0020-5p	-	66	66	-	CAAGGCAACCTGTGGAGGGCA	-
	novel_mir_22	Chr12:18850025:18850182:+	AGAAGCTACTCGAGAAGTTGGACATTGGCACTCTGGGTCAAGTTGTGTGTACTCTATTTCACTATTAATTTGTTTTTTCTACTTTTTCTTTCATCCTTATGTGTGTACTGGATCTTTTGATTGATGCCATGACTTGCTTTTCCAAGATAATGGTTAAA	...(((((.(((((((((.((.(((.((((...(.(((((((......((((.(................................................).)))).......))))))).)))))))).)).)))))))...))...)))))...	-22.7	B2-m0021-5p	-	6	6	-	CGAGAAGTTGGACATTGGCAC	-
	novel_mir_24	Chr12:21724366:21724570:+	GAAACACTTGTACAGTATAAAGATGGTGCATCCTCATGTTTCTGTCAAACACAACACTACTGATATTCTCAAATTCATCACCATAGACGATGCATGTTGTAGGCTTGGTAGGCAGCAGGAATACCAAATCCTGCTCCATCTACTCTCTCAGTGTGCCTTTATTTACATAGGAATATTAGGAGTGTGCCATATCATACGGTTGTTT	.(((((.....((.((((....((((((((((((.((((((((((.........(((.(((((...((((((..(((((.........)))).)..))).)))...((((((.(((((((........)))))))...))))))...))))))))...........)))))))))).)))).))))))))...)))).)))))))	-51.1	-	B2-m0022-3p	10	-	10	-	ATTAGGAGTGTGCCATATCAT
	novel_mir_27	Chr12:24867698:24867939:+	CAATTCTCTGATTGCATCTGAATACTACTACATTTTGAATTCAGAGAAGAGGGATGATAACATCCTGGTGCCTCCTAAGCCTACCATAGCAACCCACTGGCTTGGTCCTCGTAGCCTTTTGTTTCTCTCCACCATTTTGTAGCGCTTGGGCTCACTCATCTCATCTTTTATGGAGCGAAAACCGCAGCATGTACAATACCATATATGAATGCATAGTATAATTCAATGCAGTATATGAATGC	..((((....(((((((.(((((..(((((..(((((..((((.(((((((((((((..........(((...(((((((((((...(((((......((((..(....)..))))..)))))...............)))).)))))))..)))))))))).)))))).)))).)))))...(((.((((((........))))))..))).)))))..))))))))))))....))))..	-58.1	B2-m0023-5p	-	7	7	-	ATTGCATCTGAATACTACTAC	-
	novel_mir_28	Chr12:8088493:8088581:-	ACCAGGGTTCTTCCTGTATAGGGGTCAATGTTTTATAGTTCTAGCTTCAATGGGCAATAGAACACTCTCTGAATAGGTAGAATGCAGTT	....(.(((((.(((((.((((((....((((((((.((((..........)))).)))))))).)))))).))))).))))).)....	-25.4	-	B2-m0024-3p	7	-	7	-	AGAACACTCTCTGAATAGGTA
	novel_mir_30	Chr12:15141388:15141495:-	CCTATGTAAGTATTCATTATCTGCAGTATGATCTAGCTTTATTTTTGCGAACTTGAGGAGTCCCCTAAAATAGCAATACATCTGCAGTATGAGGGGTAATTGCATAAG	..(((((((.(((((.((((((((((.(((.....(((..(((((.(.(.((((...)))).).).))))))))....))))))))).)))).))))).)))))))..	-25.6	B2-m0025-5p	B2-m0025-3p	8	2	6	TTCATTATCTGCAGTATGATC	ACATCTGCAGTATGAGGGGTA
	novel_mir_268	Chr12:16284206:16284474:-	ATAATAGAAATGGATTACATCTCCGGCATCTACCCGTAGGTACACAGCCAAAAAGTTTAGAAATAAACATAGAAGAGCTTTAAAAAAATGCGAGATGAGATAAACCCCCAACTTCTGTGAATAATATGATCTACTAAAAAAATGTTTCTAAAATCACGTTGATTATATCACTGAGCTAGATAGCATGGTCACTTTTGACTACCTTGTCGATCATTAATCCTACTTTGGAAATTATCAACTAGATCTCTGGAAATGTGGCCACCTAGAAT	....(((...(((.((((((.(((((.(((((......(((.....)))....(((((((.......((((((((....................................))))))))....((((((((.((.......................)).))))))))..))))))).(((((..((((((....))))))..)))))(((.(((..(((......)))))).)))...)))))..))))).))))))))).)))....	-48.11	-	B2-m0026-3p	7	-	7	-	CTAGATCTCTGGAAATGTGGC
	novel_mir_31	Chr12:18102039:18102221:-	CAGCCTTGTGCCTAGGCTTCCATGTGGTTAGGGGTCGATAGTAGAGCTTCTGCTCACCATCCATGCCTGAAGAAGGGAACAGTGGACCTAGTCCAACAACCAATGTGGTTAATTTCCCCCACAAAATCTGTAAAAAGTGAAACTTTGTTGCAACTTTCATGGAAGATAGGCTCTCTTTGGCTT	.((((..(.(((((..((((((((.(((((((.((.(((.((.((((....)))))).))).)).)))))....(((((...(((((...)))))..(((((...)))))...)))))..........((((((((((...))))).))))).))..)))))))).))))).).....)))).	-58.2	-	B2-m0027-3p	77	-	77	-	ACTTTCATGGAAGATAGGCTC
	novel_mir_269	Chr12:22037591:22037813:-	ATTCTCTGAAACCTAGAAAGTTAGTGGACGGAGACTCATTGCACAGCAAAACCCCGAGTCCCCGACCATCCTTGTATGACCATAGGGGACCATCGCGAGGAGCTTGAGCATGATTTCTACACCAGGCGATCCATTTGCCTGCTGGTCTTGGAACATGGTACCACTGATGTTCTTACATTACTTTTCCCAGGTCTCTGCATTGTTTTCTCGGTTCATCAGCGAA	.(((.((((((((.(((((..(((((..(((((((((((.((.((((....((((((((((((.....................))))))..))).).)).)).)).)))))).........(((((((.....)))))))((((....((((((((((...))).))))))).............)))))))))))))))).))))).))))..)))).)))	-64.3	B2-m0028-5p	B2-m0028-3p	11	3	7	CCTAGAAAGTTAGTGGACGGAGAC	CTCTGCATTGTTTTCTCGGTT
	novel_mir_42	Chr12:24620003:24620266:-	GCCTTCGCTGCGACGGCGATGAATAAGCGGCTCAGGCCAGAGCCGCCGCGAATCCGTTGAGGAAGCTAGCACCACCAGGGACACACAATTTTTAGTCAGATGTCTAGGGGGCGCTTGGTTTGGATCTTCTCCTTTTCCCCTTCTTTTTTTCTCCCTTTTTTTGACATAAGTTTCCAAAATATTTATTAGGTTCTTTGAGCCATTGCCATTGGTTGGCATTTGGCAAATGTTGTTGGATTGGATTGGTTTGGTTTGTGAGAAGGA	..(.((((((...)))))).).....(((((((......)))))))......(((.((..(.(((((((.((((((((...((.(((((.(((.((((((((((.((((((.....((...(((...........)))....))......)))))).........((((((.........))))))..(((((...)))))...(((...))).))))))))))))).)))))))..))))..))))))))))).)..)).)))	-71.8	-	B2-m0029-3p	6	-	6	-	TGGATTGGATTGGTTTGGTTT
	novel_mir_36	Chr1:34261987:34262054:+	CTTTTACGCTCCAATTGGGTTCGATCGTGTGAGTGTACCCGCGAATCAAGCGGATAGGAGTAAAAAGA	(((((..(((((.(((.(.((.(((((((.(......).)))).))))).).))).))))).))))).	-19.8	B2-m0030-5p	-	19	19	-	CCAATTGGGTTCGATCGTGTG	-
	novel_mir_270	Chr2:1489893:1490038:+	GGTCGTCTGTAGCAGCTGAGCGTAGCCACTGTATGGTGTGTGCGCTGACTTGCAGCCAAATTCCAAGCGGTGGTGCCATCTTCACTGGAGGCGCAGCTGCAAAATCTTGGTCATCATAGGCGCTATGCAACGGCTGCACAATGGAT	.(((...(((.(((((((.(((((((...(.(((((((..((.((((.....))))))....(((((((((.(((((.(((.....)))))))).)))))......)))).))))))).).)))))))..))))))))))...)))	-56	-	B2-m0031-3p	7	-	7	-	ATAGGCGCTATGCAACGGCTG
	novel_mir_42	Chr2:5209900:5210119:+	CATCAAATGGGTTCAGGAGTCGTTTCCGACAGGCGGGGATTGCTCCGGGTTGGTGGTGATCTACGAGCAGTGCGTGCGTGCCTTCTGGCACGACGACCGCTACAAGAACGATCTCCGCTACCTCAAAGTGTGGCTGGAATATGTGAGTTTCATGAATTCAGGATTGGTTCTGAGGTGGATTGGTTGGATTGGATTGGATTGGTTTGGTTTCCTTTTGACA	.(((((((.((((((...(((...((((((...(((((....))))).(((.((((....)))).)))....(((.((((((....))))))))).(((((...(((((((((((((((((((...)).))))).))).....(((((((...))))))).)))).)))))..)))))....))))))...))))))))).)))))))............	-75.5	-	B2-m0032-3p	6	-	6	-	TGGATTGGATTGGTTTGGTTT
	novel_mir_43	Chr2:10612135:10612407:+	CACAGTCGTGCAATGCCAATCGTCTGGACACATTTACGGAAGGGATCTTGTGCAAGCACAAGTTTATAAGTGGCATTTTGTCTTCCTGGTACCTACCATTCCCTTACCATGTTTTCTCTGTACTCCTCTCACACATAATCTAAGCTAAGCTGTTGATTTGCAAAGGAGATTTCCAGAATCAGTCAAGCTAGCAATACAAGTCCGTACCGTACCCATATATATATGTGCAACCGCTCTTCTCTGTCAGACATGTTGGCGTGTGATATATCTTGG	((.((..(((((((((((((.(((((.(((....(((((.(.((((((((((....))))))..((((((.(((((..........((((....))))..........)))))..)).)))).....................((((.(((((((((((.....(((....))).))))))).).))))))).......)))).).)))))..(((((....)))))..............))))))))..)))))))).)).)))..)))).	-54.4	B2-m0033-5p	B2-m0033-3p	11	10	1	CAATGCCAATCGTCTGGACAC	GTCAGACATGTTGGCGTGTGAT
	novel_mir_44	Chr2:13848913:13849080:+	GGAGAGGGAGGGAGGGGGCGGCGCCGCCTGATGGGAGGGGGAGGGGAAGCGGCGGCCCTCTAGCCTCCCTCCCGCGGCAGATCCGCTGTCGCGCCGCCGACGCCGTCTCTTCCCCTCCCCCCAGTCAGCCGCCTCTCCCGCCACCGGCGCCGCTTCCCTTCCCATCTC	.(((((((((((..((((((((((((..((.((((((((((((((((((.((((((..((..((........((((((((.....))))))))..)).)).)))))).)))))))))))))..............))))).)).))))))))))))))))))).))))	-101.3	-	B2-m0034-3p	29	-	29	-	CCGCCACCGGCGCCGCTTCCC
	novel_mir_46	Chr2:27148134:27148282:+	GGGCTTATCAAAGGGGCGCTTACTGAGAGTTCTTTGGCATTCTGTCCACCTCCTTGTCGAATCCTCAGAGACAGAAATCTCATATCTGTTGATCTTGGAGGTGGGCATACTGCCAATGGAGCTGTGTAGGCCTCCCTTTGTAAAACCCA	(((.....((((((((.((((((....((((((((((((...(((((((((((..(((((.......((((......)))).......)))).)..)))))))))))...)))))).))))))..)))))).)))))))).....))).	-68.4	B2-m0035-5p	B2-m0035-3p	15	13	2	AAGGGGCGCTTACTGAGAGTTCT	AGCTGTGTAGGCCTCCCTTTG
	novel_mir_47	Chr2:20249942:20250211:-	GACCGCAACTGTAAGGATGACAGAGAAGCATCGATGTTGTCCACCTCTGCGTTTCAACTAGGTACATCTCTTGGGGCCGTACCTATGATTTGTGGATTGCTCAGTATTCATGGTAGCACACATGCCCACTGCACACGCTGCAAAATGAAGATGAACACGCTTTAGGCTTTCGCGTAAGACAACAGGATTCTTAGTGCCGCCCATTTCTATAGTTAAATTGGACATAAAACGCGTATGAGCATGTTGGTTAGTCCCTTGTCAGTTGTCACC	....((((((((((((.((((.((.(.((.(((((((((((((..((((((..(((..(((((((..(((...)))..))))))))))..)))))).((.(((...(((((.(((((.....(((.....)))...)))))...)))))..))).)).......(((...(((.(((((.........))))))))..))).................))))))......)))).))))).).)).))))...))))).)))))))....	-65.4	B2-m0036-5p	-	17	17	-	GTAAGGATGACAGAGAAGCAT	-
	novel_mir_42	Chr3:5579170:5579507:+	TTGCTGTTGGGGCCTCAACATCAGCGAGGCATTTCATTTCAGTACCAGTCAGGAGGCAGCAGCTGCCGGCCTCGTGACGGCGCCCAGTGCATACTACGTGACAGGGCCCGGCAGAGGCAGGTCGAGGTTGACGGTGATGAACAGATATTTCGGATGCATGCATGGGTGCAGCCATGCGTTTAAGCCTGCTAATGGGTTGGGATAAAGTGAGTAAAATGGATTGTTTTTAAGTTTGGGTTGTCTTTGGTTGGATAGAAATGGGCTGAGGAGGCTAATGGGTTGGAGCGGATTGGTCCACATGTGGAAATGGATTGGATTGGTTTGGTTTTTAATAGGTT	...(((((((((((((..(.(((((....((((((..((((..((((((((.(((((.((....))..))))).))))((((((((((.(((..(((.(.((....((((((...(((((((((((((.....((.....))....)))))).....((((((((......))))))))....))))))).....)))))).....)).))))..))).))............)))).))))..))))))))..)))))).))))))))))))........(((.(((((((((((((((......)))...)))))))))))).))))))))))...	-103.5	-	B2-m0037-3p	7	-	6	-	TGGATTGGATTGGTTTGGTTT
	novel_mir_42	Chr3:5579560:5579697:+	CATGTGGAAATGGATTGGATTGGTTTGGTTTTTAATAGGTTGGGTTGAAGCGGGTAAAATGGATTGGTTTTAAGTTTGGGTTGTCTTTGGTTGGATGGAAATGGGCTGAGGACTGGACCAATCTGCTCCAACCCATGC	((((.((...((((.(((((((((((((((((((..........(((((((.(((.......))).)))))))(((((..((((((......))))))...)))))))))))))))))))))))).)))).)))))).	-38.8	B2-m0038-5p	-	6	6	-	TGGATTGGATTGGTTTGGTTT	-
	novel_mir_154	Chr3:29333218:29333471:+	AAGCTGCGACAAACTTTCCTGGTCGCGTCGGGGAGGAGCGGCGTCTATATTCTGAGAGCGTAAGGCTGCCGGTGAAGAGCCAATCCCAGTCTCCTGTCCTCTTCTCACTGCTCCACTTCCCTCCCGAGAGCTTCTTCCCCTCCCGGCTACCCTCAGTAGTCCTTCTCGATCTGGCCTGAAGGTCACCGGTGGCAATCCCCAGCCGCCAGATGCCACTCCTCCCCGACGCGACCAGGAAAGTTTGTCGCAGCTTT	((((((((((((((((((((((((((((((((((((((.(((((((.....(((((.......((..(((((.((((((.......(((....)))..)))))).....(((((...........).))))...........)))))..)))))))..(((......))).(((((....)))))..((((((........))))))))))))).)))))))))))))))))))))))))))))))))))))).	-134.6	B2-m0039-5p	B2-m0039-3p	106	103	1	AAACTTTCCTGGTCGCGTCGG	GACGCGACCAGGAAAGTTTGT
	novel_mir_133	Chr3:29382335:29382441:+	GCAGCTTAAATAGCAAGAGCGTCCCACCACCTCCAGCCGAGCTCAGCAGCGCGAGCTTGTAACCCGAGCGGGGGCATTAAGGTGGTGTGGACGTTGCCGTATGGCTG	.(((((......(((...((((((((((((((...(((((((((.((...))))))))....(((....))))))....)))))))).))))))))).....)))))	-47.3	-	B2-m0040-3p	19	-	19	-	TTAAGGTGGTGTGGACGTTGC
	novel_mir_50	Chr3:32511910:32512120:+	ACCACATGCAAGTGCTATCATTTCACCTACATCGTTTATTAGCTACCAAAATAATTTTTTGAAAGAACTTTTATATATGTGTTCATAGCAATTTAAAAGCTAATGATGAAAAATAAATTACAGCAAAAAAATCAAAATTAACTCTTTAAGAAATATCGGAGCTGGTGAGAAGCAAAGAAAACAAATGTAGAGAGAATGGTCGTGCGATGGA	.(((..((((.(.(((((..((((..((((((..((((((((((.((...(((.(((((((((.((((............)))).((((.........)))).((((.......................))))..........)))))))))))).))))))))))))...............)))))).)))))))))).)))).))).	-32.5	-	B2-m0041-3p	35	-	35	-	ACAAATGTAGAGAGAATGGTC
	novel_mir_18	Chr3:36271499:36271667:+	AGGAGAGGTTATGGATGGATGGATGGATGGGATTGGATTCCCCTTCCCCCGCCCCCAACTAAACAAACAACTAGTATATGCTAAGGGCGGCGCAACGCTAATACTCCTCCCTAGTCCTCCTAGGCTACTCCTCTCCTCCCTTCCATCCATTCACCCTTCGCTTCATCCG	.((((((((...((.((((((((((((.((((..(((.......))).((((((.................((((....)))).))))))...................(((((.....)))))............)))).)))))))))))).))...))))).))).	-55.8	B2-m0042-5p	-	11	11	-	ATGGATGGATGGATGGATGGG	-
	novel_mir_51	Chr3:1205062:1205245:-	AGTGAAGAGAAAGAGTAGCGTTGATACACCGTCGAATCGAATCGAATCGTGCCGGACCCCCACCATCGCCTCCCCTCTCCCCATATCGGAATCGGAATGGGGAGCATCGCATCCCTTCCCTTTCCTTTCCCTCTTGCGTTTGCGTGATTCGTACGGTTTATCACCGCCTCTTTCTCTTCCACTC	(((((((((((((((..(((.(((((.((((((((((((...((((.((((..((....))..)).))........((((((((.(((....))).))))))))...((((.......................))))))))..))))))).))))).))))).)))))))))))))).)))).	-66.1	B2-m0043-5p	-	7	7	-	AAGAGTAGCGTTGATACACCGT	-
	novel_mir_18	Chr3:3825506:3825618:-	GGATGGGTGGATGGATGGATGGATGGATGGGATGGAGCTGATCAATCGTGCGGTCACCTCCGATGGGGACGTCGCACCCAACCATACATCTCACGCCCAGTCCAGCCCAGCCG	((.(((((((((((.((((((..(((.((((.(((((.(((((........))))).)))(((((....))))))))))).)))..)))).))...))).)))).)))).)).	-47.5	B2-m0044-5p	-	13	12	-	ATGGATGGATGGATGGATGGG	-
	novel_mir_53	Chr3:27558149:27558297:-	TTATCTCGTGTTCGCTCTCCATTTGTTATCTACAACTTGATGTTTATGTATCAAAGATGAGGAGACACAACAATGAAGAACAGGTTGGTGTTGCATTGATCATCATTCATCAGATTAAAGTGTAAGACAAGTAGAGGGTCACTGCTGAA	.......(((...((((((.(((((((...((((.(((((((..((((.((((...(((..((.((.((((..((.....)).)))))).)).)))))))))).)..)))))......)))))).))))))).))))))))).......	-30.2	-	B2-m0045-3p	8	-	8	-	AGTGTAAGACAAGTAGAGGGT
	novel_mir_55	Chr4:5479935:5480032:+	GGATGATCTAACGGGACGTGGGGTGAGGTGGACCTGGGTTGATACATATTTGACGCTCGGAATACTAGGAGCACGCTGCGCTCCTAGTAGTATCTCTA	(((.(((....((((.(((.(((((.(((.(((....))).)).).))))).)))))))...((((((((((.......))))))))))..)))))).	-30.4	B2-m0046-5p	-	49	49	-	ACGGGACGTGGGGTGAGGTGGAC	-
	novel_mir_56	Chr4:13393623:13393776:+	AGTTCAAGCTACATGACTGTGTCAGGCGTTGAGATATTCTGCATTACTGCAGAGGAGTTGATTCCTTCAGTCAGCTTGTCTCCTTGGATGTGTAGAAATCTGCAAGATGGATGCATGCGAAGGCATAATGGCGCATAGCGATGTGGAAGGAGAG	..(((...((((((..((((((..(.(((((.(...(((((((....)))))))(((((((((.....)))))))))....((((.(.((((((...((((...))))...))))))).))))).))))).)))))))..))))))...)))..	-47.2	B2-m0047-5p	-	17	16	-	ACATGACTGTGTCAGGCGTTG	-
	novel_mir_222	Chr4:14601824:14602180:+	ACAAATAATTCATTGCATGCCGTTCAGATAGCCTAGCAGTTTTGCTGTAGACCAAAAGATGGAATAAGCTGTATAAAACCACTTTTGTACTTAGTACGTATATCAAGCAAGGTGAGCAAAATAATGAATTGAAAGACATCTTGTACGGGTAAAAATCAGGAGAGAACTCACTAACTAGGGCAAGTTGTCAATAGATTCAAGAGTCTCTATAACACTGGGTGATCTTGTTCGATTGAGCACTCTTAACAGCAAAGTTGGGTAACTATCCCTCCCGGTTAAGGCTGCGAGACCTCTTTATTTCTTGATTGCCTGCAGCCTGCGTGCTGTCTGGATGTGGTACGTAGAGCCACTATTTGG	.((((((...(.((((.(((((((((((((((...((((....(((((((..(((..((.((((((((((((((((((....))))))))..)))..((.((((......)))).)).......((((((....((((.(((((...(((.......(((((....))).)).)))...))))).))))....))))))((((((((.....(((((((.(((..(((((....)))))..((((((......)))))).....)))...))))))...).....)))).)))))))))))))..))).)))))))))))..)))))))))))..)))).)))).)....)))))).	-91	-	B2-m0048-3p	6	-	6	-	TCTGGATGTGGTACGTAGAGC
	novel_mir_271	Chr4:17386271:17386500:+	TTCCTCTCAATATAGCCATGGTCTCGTAGCCACCGTGTAGAAATATGTTTACTGATGTGTTCAATATACAGTATAAAAGTAAAAAACTGATTCTAAGAGTAGTATGAATGAAAAAATTACAGGCTCAATCACACACAATCGATAAAATTACTCACAGGTGAATCAAACTAGAAAAAAAATGATTCGGCCACAAATCCATCTGGTGGCTTTGTTGGATCTTGATATAAGGA	.((((.....((((..((.(((((((.((((((((.((.((........(((((((((.....)))).)))))..............(((((....((((.(((.............)))..))))))))).........................(((((((((..............)))))).))).....)).)).)))))))).))..))))).)).))))))))	-40.7	-	B2-m0049-3p	15	-	14	-	CTGGTGGCTTTGTTGGATCTT
	novel_mir_59	Chr4:17418974:17419104:+	AAGGTTAATTTGGAGTTTACTGGCTAGACTATGATCGAAACCGTCACAGGCATATGCGAGGGGCATATAGGAATAGGAGGCATGTGGGAGTTAACTTGAACGAGATCAGATGGTCACTCTATACCCGCTTC	.((((.....((((((..(((..((.((((.((.(((((((..(((((.((((((((.....))))))...........)).)))))..)))...)))).)))).))))..))).)))))).....)))).	-26.5	-	B2-m0050-3p	7	-	7	-	CGAGATCAGATGGTCACTCTA
	novel_mir_135	Chr4:17419253:17419469:+	GCTTTCAAGTATATATTTGATCAGGGATTCAACATGCCTAAGTGTCATTATGCATAATGCATGACATATAGTCAAAGAACAAGAAAAAGAATGGGTAGTACCAAAATGCTAGGTAAGTGTGATGCATCAGAGACAGCCTTGCGTGGCTGCTGTACAGGATTGAATCATTTTGTGGTTTGGACTGGAATTTAATGTTATCAAGAGTGTGCCATCATTT	........((((((.((((((((.((((((....((.(((.((((((...((((...)))))))))).))).)).................(((......)))..((((..............)))).(.((.(((((......))))))).).(((..(((((((((...))))))))).)))))))))..))..)))))).))))))........	-47.4	B2-m0051-5p	-	9	8	-	ATATATTTGATCAGGGATTCA	-
	novel_mir_61	Chr4:17474107:17474276:+	CACCAAGCAATATGTTGTCTTCTTCACCAGTGCATGCAGATCCTTTTCTCTATAGCTACAATTTTAGGATGGGGAGACGTGAGGAATCAAAATATGCGAAGGATGTGCGACTCAGGAACAAGGTTAGTTACACAACCCACTGGTGCTGAAGTAGGGATGTAGGTTCCAGA	.....(((.((((.((..((((..((((((((..((((.((((((((((((((..(((......))).)))))))....(((....)))........))))))).))))............((((........))))))))))))..))))..)).))))..))).....	-45.2	-	B2-m0052-3p	46	-	46	-	CTGGTGCTGAAGTAGGGATGT
	novel_mir_136	Chr4:17498331:17498495:+	GAACATTCCGTGTCACGAGCAGAAAGAGCCAGTTTGCTTATCTGAAGCCGGTCCTTCAGCCAAAGGAGATTCACAGAGAGCGCCAGATTCTTCTAGTATTCGAAGGCTACTGAGCTTGTTCAGCTCAGACCGTACGTACGCCAATCTTTTCAAAGGGTGTGTTTA	........((.(((..((((.(((.((((((((..((((..((((((......))))))....((((((.((.............)).)))))).........)))).)))).)))).))).)))).)))))....((((((.............))))))....	-40.9	B2-m0053-5p	-	9	8	-	TGTCACGAGCAGAAAGAGCCA	-
	novel_mir_62	Chr4:17663201:17663402:+	TTGTCCTCAATGGTGATAACAGGAGCTTGGAGCATGGGCGAGCCCATCCTCTCAATAACTTTATCATCATTAAGCCATTAAGTAGACAATGTGACTAGCAGTTCATTAAGCCTGCCATAGCATGCATTGCCATACATGCATGTTTCTTTTTTCTTGAAAAAGGGATTGCCGAGTTAATGTTTCCTAGCCTTGTCGAGGGAAA	.....((.(((((((((((.((..(.((((((.(((((....))))).))).))))..))))))))))))).))......((.(((((...(((((.(((((((..............(((((((((........))))))))).(((((((...))))))))))))))..))))).))))).))..((((....))))...	-53.2	B2-m0054-5p	-	14	14	-	TGGTGATAACAGGAGCTTGGA	-
	novel_mir_64	Chr4:13025823:13026157:-	AGTTACTGTTATTCTCCTACTAGGTTTGTTCCTGGCCTCCTGGGCATGGCAGGAATTGGAAACTATTCAGGCACCTTCGATCACCTTGATCCCAGGTCTGGTTGATCTCAGGCCACGCAAGTTCCTTGGATGCTCACATATAGTGCCTGTCAGCCGCCCATGGCCCGCCGTGGCAACGTGCTGCAGACTTGGTAAAATGCTGTTTCACTCTTCGGTGTGATAAGCACACACTAATACGGATGCCCAGGAGAGACCCTAGCTGGTGGTGGCCTGGCCCGGCGGTGTCTCTACTATGCCTAGCGATTGGATAAATTGGTAGAGTGGATGCAGCTGAT	.((((((((.((((.((((((((.(((((((..((((((((((((((.((..((((.(....).))))..))......(((((...)))))(((((((((........(((((((..((((...))))..))............))))).((((((.((((((....))))))...)).))))))))))))).....((((...((((........))))..)))).............))))))))))).).))(((((((((((.((((((......))).))).)))))).).)))).....)))))))))))))).).)))))))).))))	-112.6	-	B2-m0055-3p	43	-	43	-	TGGATAAATTGGTAGAGTGGA
	novel_mir_65	Chr4:14571152:14571268:-	CATGTAGAAGACTGATTTGTCTTGGATGTTTGATGTCACGCCCAGAAATTCACGAACCAGAATTTCTAAGCTGAATATGCATTAAATCCCTGTCCAGGACCAGCCAGGGTATACAAA	..((((.....(((.((.((((((((((((((((((((.((..((((((((........))))))))..)))).....)))))))))....))))))))).)).)))....))))..	-34	B2-m0056-5p	-	72	72	-	ACTGATTTGTCTTGGATGTTT	-
	novel_mir_65	Chr4:15194360:15194476:-	CATGTAGAAGACTGATTTGTCTTGGATGTTTGATGTCACGCCCAGAAATTCACGAACCAGAATTTCTAAGCTGAATGTGCATTAAATCCCTGTCCAGGACCAGCCAGGGTATACAAA	..((((.....(((.((.(((((((((((((((((.(((((..((((((((........))))))))..)).....)))))))))))....))))))))).)).)))....))))..	-35.5	B2-m0057-5p	-	72	72	-	ACTGATTTGTCTTGGATGTTT	-
	novel_mir_137	Chr4:17488209:17488303:-	GGCCGTGGCCAAGTGTGTAATGTTGAACGGACTGCTTCTCTGGCCCTTGTCACGTCTTCTTGTTCAGCATTGGATTGGGCTTGGCGTCAGGACCA	((((...(((((((((.((((((((((((((..((.....((((....)))).))..)).)))))))))))).))...)))))))....)).)).	-32.8	B2-m0058-5p	-	47	47	-	AAGTGTGTAATGTTGAACGGA	-
	novel_mir_67	Chr4:17501349:17501479:-	AGGCATCAAATAGCCTGACTGTCATTGGGAATGGTGAAGCCACTTGTAATCTTCGAACAATACCAAAAAAAAAGGTGTACATCATGATGTAATAATCTGTATTCCCAACTAGCACGACTGAAGGGATGCCC	.((((((...((((.((.(((...((((((((((((....)))................(((((.........)))))....((.(((......)))))))))))))).))))).).)))....)))))).	-29.6	-	B2-m0059-3p	15	-	14	-	ATTCCCAACTAGCACGACTGA
	novel_mir_68	Chr4:17720762:17720925:-	TCTCCCGTCTGGCTCCTCGCCCATTCGGCCGTTCCGGGATTGGGATTCGATGACATTTCCCCATGACATTCTCGATGATTGAGTCACTACACGTGGGTCCAGGCTCATGTGGGTCCCGCATGTCAGTGACTCAATGTCACTGAGAATGTCACGGGTCACGGGGG	.(((((((..(((.....)))(((.(((..((((((....)))))))))))).......(((.(((((((((((.((((((((((((((((.(((((((((........)))).))))).))).)))))))))..)))).))))))))))).)))..)))))))	-74.8	-	B2-m0060-3p	30	-	29	-	ATGTCACTGAGAATGTCACGG
	novel_mir_139	Chr4:21089993:21090305:-	TTCCGCGTTTCTAGGGAGTACTAGAGTTGATGCAGCTTTGTCCCAGATGCCTTCCATGCCTATATGCCTAAACTAGAGCGATCGATGCATCATCGTCTCGACGGTCGTTGGAAAATTTAGTTCCCAACTCACTAGGATATATATAGTTTGTTGTCTGGTCTCACTATCACCTCGGTCTTGTATTTCTTTTATAATCATAGCACTATATATACTGGACGCAAAGGAAAATCATGTGTGTTTCACATCTTTTTTTTAGTCCAACAAATATTCCAATGCAGAGGATTATATCTGTATTCTCTAAAAACTTCAGGAT	.(((..((((.((((((((((.(((..((((.(..(((((.....(((((..((.(((((((...........))).)).)).)).)))))(((((....)))))((((((((.((((.(((((..........)))((((((((((..(((((..(((.........)))......(((((.......)))))..))))))))))))))).(((((..((((((((...(((((.....))))).)))))))).))))))))))).))))))))))))))))))..))))))))))))).))))....))).	-67.7	B2-m0061-5p	-	6	6	-	CTAGGGAGTACTAGAGTTGAT	-
	novel_mir_272	Chr4:22407619:22407760:-	TTAGAAGTTTAAAGAAATTAGAATGATGTGATGTAAAAATTAGAATATTCAAACTTCCAACTTTTCCGTCACATCGAACTTTACTACACACATCAACTTTCAACTTTTCCGTTACATCGTTCTAATTTTTTCAAACTTCCAT	...(((((((.((((((((((((((((((((((.((((.((.(((.....................................................))))).)))).)))))))))))))))))))))).)))))))...	-32.99	B2-m0062-5p	-	9	9	-	AAAGAAATTAGAATGATGTGATG	-
	novel_mir_71	Chr4:30081881:30082098:-	TCATTTTCACTTTGGGCTAGGTATTTTCACCTTTGTTGCAATTTGGACTACCCTAAACCACTTCTTCAGCACATCAATTCCAGCCCACCGGTGAACTCCTCCACCTCTTTGCAGATTCATATCTTTGCTGGAGGAGAGGCCAGACATGGCTAGGGAAGAGAGTTGAGGTGGTCCAAAGTGCAACAAAGTAAAAAATACCTGGTCCAAAGTAAAAGATT	...((((.(((((((((((((((((((...((((((((((.(((((((((((.............(((((...((..((((.(((....)))...((((((((.......(((((........))))))))))))).(((((....)))))..))))..)))))))))))))))))).))))))))))...))))))))))))))))))).))))...	-91.4	B2-m0063-5p	-	5	5	-	TTTGGGCTAGGTATTTTCACC	-
	novel_mir_72	Chr5:3086479:3086703:+	ACTAGTGAATGGAAGGTATCAGGAATTTGGATCCCTCTTTGTCATTCCTGCATGGAGTAGTTTTAACCTCTTGAATCTTGATGGTGCCTCCATTAGGTTGGTTTAAATAATAACCTAGCCTGTTGTCTCATCCAAGTCTCTAGATTTTATTTTGTATGCTTGCATGGCTCTAATCCATTTTCTGTTGTCAGGATCTGAATATCTTGAGCATCCAGTTGTGCTAGA	.((((((..((((..((.((((((((((((((((((((.(((.......))).))))...........(((.((..((((..((((....((.((((((((((........)))).)))))).))...))))))))..)).)))........((((....))))((((..................)))))))))))))).)))))))).))))....)))))).	-56.4	-	B2-m0064-3p	55	-	55	-	CTGAATATCTTGAGCATCCAG
	novel_mir_273	Chr5:18626120:18626315:+	TTGTTAGTTTGAGATACATCCCACCAACCCCATTGTTTGGGGCCTTGGGCTCATATGACAGTGATAGTTGACTATTACAGTCACTGCATATGGATCCCACCCTGTTGCCCCACACGTAAGTATCTATAATGGTAATGGCATTACGATAAAGGATGAGAACCCGACAGTGATGTTGGATGGCTGGCAGAACTACCAT	.((.((((((......((..((((((((..(((((((((((((..((((.(((((((.(((((((.((........)).))))))))))))))..)))).......))))))..(((((((...(((....)))...)).))))).....((........)))))))))..))))).))).))...)))))).)).	-56.7	-	B2-m0065-3p	10	-	9	-	ACAGTGATGTTGGATGGCTGGCA
	novel_mir_140	Chr5:18668026:18668219:+	GATACGCACCTAAAATGGCATCCTCTCTTTCCAATCACGGGACATGCGCCAGAGCATCAAATCATTCACAATTAAACTTTCAAGATTTCGCTGCGCTGCGCCGAAAGTGACTTCGTCGCTTTGTAATTAATAAAGCAAATAGTTATGCAGCATGTGCCGCTGAAAGTGACGGTGTCGCTTTGCAATTATTGTCA	((((......((((.(((((((.((.(((((......(((.(((((((((((.(((.((((((....................))))).).))).))).)).....((((((.....(((((((.....)))))))....))))))...)))))).)))..))))).)).))))))).)))).......)))).	-47.8	B2-m0066-5p	-	11	11	-	TAAAATGGCATCCTCTCTTTC	-
	novel_mir_75	Chr5:29688157:29688507:+	CTTACTCCTTATCTTTTCAGTTCTTGTTCCAATTCCGATTACGGTGGTGGCCCATGTAATTAAAAGGCCCATATATATATAAGCTGGCAAGGCCGCAAGACTGAAGAGGAGAGGCAATGCCATGCATGCAGATGAAGATCGCTTCTCTTGTATGTAAGTATGTATGTAGAAGGAAAATAAGGGGGAATATATATAGTAAAATAGTAATTCAGGAGTGGTGGGTGTTCCTGAAAGAGCTCATGGCCACAGGGCTTAACATAGAATCATCTTAATTGTGCGGAAGAAACAAAGCATGCACGCGCAGGAGGATGGAGTAGTAGAATGGATGGATGGATGGATGGATGAGGGTAG	.((((.((((((((.((((.(((((..((((.(((.(((((((.(((....))))))))))...((((((.((((((((((...(((((..(((......((....))....)))..)))))(((((((((..((((....))))..)))))))))..))))))))))................((((...(((......)))...))))....(((((.((.((((......)))).).).))))).)))))).........(((((((..(((((((..................))))))).))))))).......)))))))..)).))))))).))))))))))))	-96.7	-	B2-m0067-3p	18	-	18	-	AATGGATGGATGGATGGATGG
	novel_mir_77	Chr5:19141960:19142045:-	CGGGATCGTCCCTCGGACAGATTGATCAAGAAGAACTTGTTCTCATGACCAATAACTTCATTAATGAATCTGACGGCAACATCTCT	.(((((.((..(.((..((((((.((.((((((...(((.((....)).)))...)))).)).)).)))))).)))..))))))).	-18.6	-	B2-m0068-3p	9	-	9	-	CTTCATTAATGAATCTGACGG
	novel_mir_79	Chr5:25105550:25105704:-	TCAGCTGGAGCTTCTGTAGGATCAGGTTGTTCGTTTCAAATTCCCCATGCATCTCATTCTTAGGGCACCACTGGTTTCTCACAAATCAGAGTAAGGGAATGGTCTGAGATTTGCAGTTTCCGAATGCCTGGTTTGTCCAGAGTAGTAGCAGCCTT	...((((..(((((((..(((((((((.(((((..............((((......(((((((.((((.((.....(((........)))..))))..)).)))))))..)))).....))))))))))))))...))))..)))..))))...	-41.7	B2-m0069-5p	-	48	48	-	CTTCTGTAGGATCAGGTTGTT	-
	novel_mir_274	Chr5:25129390:25129534:-	CTGAGAAGCGAGCAGCTAACATGAACTGGACCATACTGATGTCACCAAAGTTCATCTCCAATTCCCCATGACTCCCATTCTTATTAAGGCATACTATCACATTTTGTTGTCGAAACGCCGGTATATGTTGTGTTGCTCTTTCCAC	.((.((((.((((((((((((((.(((((........((((..((....)).))))...........(((.....))).........((((.((...........))))))......))))).))))))).))))))))))))).	-29.5	B2-m0070-5p	-	13	12	-	AGCAGCTAACATGAACTGGAC	-
	novel_mir_80	Chr5:25143438:25143654:-	TGAACTGGACCATACTCAGATCGACGCAGTTCACCTTGAATTCCCCATGAATCCCATTCTTAACTTAAGGGCATGCTATCACTTCTCGTCGTCGAACCACCGCCGGTACGCTGATTTCTCGTAGAAATGACCAGGGTTCGAATTTTGAGTATTGAGCGATCAGCGTGACTTGGAATATTGAGTGATCGAGTGTGACTTGGAACTTAGTGCTATTCAT	((((..(.(((((((((.((((.((.((((...((..(.((((.....))))(((.............)))(((((((((.(((((((...((((((((((...)))...(((((((((...))))))...))))))))))....))))....))).))).)))))).)..))...)))).)))))))))))))............)).)..)))).	-51.2	B2-m0071-5p	-	15	14	-	CATACTCAGATCGACGCAGTT	-
	novel_mir_84	Chr6:17751138:17751350:+	TTCATCGAGTATTGGGCAATGGAACGACGTGCGGTAAATCACACCATTCCGTAGGTGTAAAATGTTATACATATATTTAGGTTTTATATTTCTCTATTTGTAAAGGGTTTCAGATGAATACAAGTGCTATTCGTAACAATAAAGGATGTTTTTCATTCCAATCTAAGACGTTGTATTTCTGTTTGTACAAATTTGTGCCTTGGCACCGATGAT	.((((((((.((((((..((((((.(((((.(..((....(((((........)))))....((((((..((((((((.(..(((((....((((........))))......)))))..)))))).)))..)))))).))..).)))))))))))))))))))......((((((........))))))....((((....)))))))))).	-42.6	B2-m0072-5p	-	15	14	-	ATTGGGCAATGGAACGACGTG	-
	novel_mir_85	Chr6:24616964:24617158:+	TTGTTTGGTGAACCAAAGAACACCAAAACCCTCTCGGATTGATGTTTTTTTAGTTGAATTCCTCCCATTCCAAAGGAATTGTAGATGATCCAGACACAAATTAAACAAGCTCCTTAAATCGTCAAATGCATAGGGAAAGGGAGGCACCGGGAATACAATTTCAAGGAATGGGATCTGTAGAGGGAAGACGAGCGT	...(((((((..........))))))).((((((((((((..((((((((.(((((.(((((((((.((((......(((...((((((............................)))))).)))......)))).)))).......))))).)))))..)))))))).)))))).))))))...........	-47.5	-	B2-m0073-3p	15	-	15	-	GGAATGGGATCTGTAGAGGGA
	novel_mir_86	Chr6:28312353:28312687:+	TCTGTCTCCTAATCTGCTGGTTTGTGTGGCGAGAGCGCAACTTCAGAATTTTTGAACAGAAAACGCGAACGGCGTTAGAACTCTTCAGAGATATCAAAGATGAAGTTGTAGTGTGGAGAGAGGCCAACATTTTGAGAGAAGTCGGCTAAAGGTCCCGCCTTTGGCGGTTTGCTTCGTTTTTCCTTTTCTTTCTGTTCTTCTCGACTGTTTAATGTCGATTTGTAAAACTTTTCATAACCTCTCCTGATCCTTAATACAATTTGGGCAGCCTGCCTTGGGCCGTCCCGGCTAAAAAAAACCACTGCTAATCAATCGGTGGATTCTTAGGTGACGCG	..((((.(((((((((((((((.(..(((((...((((((((((((((((((((((.((..(((((.....)))))....)).))))))))).)).....))))))))).))((((.((((((..........(((.((((((.(((((((((...))))))))).)...))))).))).....................(((((........)))))...................))))))(((.(((............))))))((......))((((...)))).........)))))))))..))))))))))))...)))).))))..	-94.6	-	B2-m0074-3p	10	-	10	-	CTAATCAATCGGTGGATTCTT
	novel_mir_87	Chr6:4740913:4740987:-	TTGGTGAGTTTGTCTTTCAACTGTGTAATTGCATTGACAATGTTATGAATAGTACTGAAGGGCATAAATTCAGTA	.((.((((((((((((((((((((...((.(((((...))))).))..)))))..)))))))))..)))))).))	-20.2	-	B2-m0075-3p	14	-	14	-	ATGAATAGTACTGAAGGGCAT
	novel_mir_88	Chr6:9574910:9575031:-	CTTCCTTCCCTAGAGCCAGCAGCACAAGTGCACAATTAGGGGTTAGGAGGCATCATGAAGCTCAACAAAGTGCTGCTCGTGAATGTTTGTTCTGCCTAGCACCTAAGACGTATGGAGGGTCT	...((((((.....((.....))....((((....(((((.((((((((((((((((((((.(......).)))..))))).)))).....)).)))))).)))))...))))))))))...	-32.5	-	B2-m0076-3p	5	-	5	-	CTGCCTAGCACCTAAGACGTA
	novel_mir_89	Chr6:9577737:9577853:-	CCATGAACTAAGACAGACCTGCATCTTCTGTACCATGGCAGTGCCCATCGATGCTGCTGTGTGGAAACTCGTTCTTTCTGTCCTGGTACCAGGCTTTGTGGAGTCTGTCTGCTATGC	.((((.....(((((((((((((...(((((((((.(((((.......(((..((((...))))....)))......))))).))))).))))...))))).))))))))..)))).	-38	B2-m0077-5p	-	12	12	-	AGACAGACCTGCATCTTCTGT	-
	novel_mir_243	Chr6:9731103:9731292:-	GTGGGTCAGCTATGGCATGCAGAGGATTTGTTCTCTTCGGCGTTGACGCTTTCAGGGAGAAGGCTAGCTGAAAGCATGCCGTGTATCTACCAACTTGTGGAAACACGTTCTATAGGTGCAGGTGTGATGCTGAATTATAATGAGTGGCACAAATTCAGGGAAAAGTGGTTGCATGCTGAGTAAGACTTGA	..(((((.(((..(((((((((...((((.(((((..((((((....((((((((..((....))..)))))))))))))).(((((((((.((((((((((.....))))))))))...)))).)))))..........(((((.......))))))))))))))..))))))))).)))..)))))..	-62.9	-	B2-m0078-3p	5	-	5	-	GAAAAGTGGTTGCATGCTGAG
	novel_mir_162	Chr6:24663460:24663548:-	CCACCATAGGTGGGCAATAGTCTTCCTGCCCCGCTGGATGATAGCAGTTTCAACCGGTAGCATGAAGGCTTTGTTCGCACTAATGCGTG	.((((((((((((((((.(((((((.(((...(((((.(((........))).))))).))).))))))))))))))).)).))).)))	-36	-	B2-m0079-3p	11	-	10	-	AGCATGAAGGCTTTGTTCGCA
	novel_mir_90	Chr6:26473452:26473802:-	TCACTATTTAGTTGCCATTTTGTTGCACATTGCCATTCCTCTTCTCCCTCTCTCTGACTGCATGAGTACGTATGTACTCTGCTTAGAGCAAGTTTAATAGTACTAGCTAAATGCTCGTGCGTTACAACAGAATTCTAAAAGAGAACTTCATTTTTCTAAAACCATTCCCCATTGTCGACTCACGAGACTATAGATGCATCAATAAAATTTTATTGGTTAGCTCGCATGACAAAATGATTCCTAATCATGATCCTAACTTAAAGTTGCTATTAAATTTTCTAATGGATTTTTTGCGATTTCGATAGCCTGGTTTTCTTGAATGGCTGTGATGATTTGGCTGCCCCCTCGAGA	..........((.((((..((((((((....(((((((.......((....((((((..(((.((((((....))))))))))))))).(((((((((((((((..(((....((((((.(((((((..((((......((((((......))))))......))))....)))).))).))))))....)))......((((((....))))))(((((....(((((...............)))))...)))))....)).))))))))))))).(((.((((...........)))).)))...)).......)))))))))))))))..)))).))..........	-80.7	-	B2-m0080-3p	59	-	59	-	TGGCTGTGATGATTTGGCTGC
	novel_mir_275	Chr6:26493461:26493658:-	CCGTTGCTTCCGGCGAGTCTCCCGAGCAGCGGCGGCCGCCTCGGATCTCCGCCATCCCCCCCGCCGAGCTGCGCCTCGCCGGCGTTGGCACGGAGGCCACCGCTTCGGCAGCCGCAGATGCCGCGGGCGCATGCGGCGGCGGGGGATGGGGGACCCCGTGCGTCGGCTTCCTGCTCGGGGGCTTGGCCCGGGCAACGA	.((((((..((((((((((.(((((((((.(((.(.(((..(((...(((.(((((((((((((((...((((((.(((.((((((....(((..(((........)))..)))..)))))))))))))))..)))))).))))))))).)))..))).))).).)))..)))))))))))))))..)))))))))).	-132.5	-	B2-m0081-3p	9	-	9	-	TTCCTGCTCGGGGGCTTGGCC
	novel_mir_140	Chr6:27238478:27238671:-	GATACGCACCTAAAATGGCATCCTCTCTTTCCAATCACGGGACATGCGCCAAAGCATCAAATCATTCACAATTAAACTTTCAAGATTTCGCTGCGCTGCGCCGAAAGTGACTTCGTCGCTTTGTGATTAATAAAGCAAACAGTTATGCAGCATGTGCCGCCGAAAGTGACGGTGTCGCTTTGCAATTATTGTCA	((((......((((.(((((((.((.(((((......(((.((((((((....................................(((((.(((...))).)))))((((((.....(((((((.....)))))))....)))))))).)))))).)))..))))).)).))))))).)))).......)))).	-45.2	B2-m0082-5p	-	11	11	-	TAAAATGGCATCCTCTCTTTC	-
	novel_mir_91	Chr6:28330745:28330822:-	ACTATAGCTCTGCATGGGATTGGGATGTACCGGGACATTTAAGAATGATGGTTCGTTGGATTCCGCAAGTCTATCAGG	.((((((((.(((..((((((..((((.((((...((((....)))).)))).)))).))))))))))).)))).)).	-18.4	-	B2-m0083-3p	13	-	13	-	ATGGTTCGTTGGATTCCGCAA
	novel_mir_93	Chr7:5730180:5730396:+	AAACTCCCGCTGCATCTCATGTTCTATCCTGATCCTCAATCCAACACCACTTTACTAAGCAAAAGTTATATGCGCGAAAATTGTTGTGTTTACGATACACAAAATTGCAAAACAAAGTGCTGCTGAATTCTATAAGAATGGGAAGCATTCAGAAAGCAAGAGTTTTTCCAAGAGAGGCAGTACTGCAGTAGAACAAGAGCATAGCAGCTTGGCTCCA	.....((.((((((((((.(((((((..(((.................(((((........))))).......((((...((((.(((((...)))))))))..)))).......(((((((((...((((.......(((((((.((((.........))))))))))))))).))))))))).)))))))))).))).)).)))))..)).....	-50.6	-	B2-m0084-3p	76	-	74	-	AGTAGAACAAGAGCATAGCAG
	novel_mir_94	Chr7:6434033:6434328:+	TATGTAGCCAATGTAAGAGGTCGGTCATGATTCTTGAAGCCCTGCGGTACTTCCTATTGAAAGAGATGGAGGCGGTATGTATAGCTGATTGATCCGTTTGTTGCCATAGGAGCAAACTTCTCTTTATCCCCCTTGACTCTTCAAACACCTTTGATAAGGTCTTTGCTAGAAGACTAGAGCACTAGACAAAAAAACAATGGGATTCACATGTTCTTGGTAGTTTGGCCAATTTGGTGTCTTCTCGGCATAGCATGGGCGACCTTCGGCATTGAAAATACTTTCTTGGTGCTTGCAGC	..((((((((((((..(((((((.(((((......((((((....))..))))...(((((.(((.(.((((.((.(((...((..(.(((.(((...((....))..))).))).)..))...))).)))))).)))))))))..(((((....)))))((.(((((((((((((((...((((((..((.((((.((.......)))))).))....))))))....))))..))))))).)))).))))))).)))))))..)))))).....(((.....))))).))))..	-73.9	B2-m0085-5p	-	106	105	-	ATGTAAGAGGTCGGTCATGAT	-
	novel_mir_247	Chr7:6439139:6439305:+	AAAAGAAAAAAGGTTATGGAATGAAGTACGCCGCTTATCTTTTTGTTCGGAATGTTTCTAAGCTCTGAACTGGTGCTGGAAAACCATGGTAGCTTCTGTTTCTTTGTTAGTAGTTCTCTGTAGTCCTTTCTTGTACAAGACTTTGCTCCTGTTCTAGGCTTTCTTTC	.(((((((((((((((((((..(((.(((...............(((((((..(((....))))))))))((((........)))).((.(((....))).))......))).)))))))))).)))))((((.(((.((......)).)))..)))).))))))).	-29	B2-m0086-5p	-	5	5	-	AGGTTATGGAATGAAGTACGC	-
	novel_mir_276	Chr7:6990539:6990779:+	CGACATGACTTCGTCTACTCCAATTGCTAGTAATACTCTTAAGACAACGAGCATGGATGAATCTTCCATCCAACGCTGTTAGAGTTGTTCCTTAGGGGAATGCATAAAGTCTACTAGGATTAGGAGGCAGTGGGAATTCAGCATTGAGAGGATGAATCCTTTCGAGTTTTGAATTGTCATATACTCTCTGGAAATCATTGATCAGGTGGAGCAGTGATTGGCAAGACGTGTCTGAGGTGTC	.((((((((..(((((...(((((((((.((....(((((((((((((.((((((((((.......))))))....))))...)))))..))))))))...........((((((..(((((((((...((((.(((((((..(((((((((....)))))))))...))))))).))))...))))...........))))).)))))))))))))))))..))))).)))....)))))	-73.9	-	B2-m0087-3p	5	-	5	-	GCAGTGATTGGCAAGACGTGT
	novel_mir_142	Chr7:9043279:9043424:+	AGTGCCGCCATGGATGTGAGCAGGCACATGAGTCAGCGATCTGGAGCGAATGGAGCCTTCCTGGGCAACACACCTGCACCGTAGTTGCAGTCTTCCTGAGCTCATGATCTGCTTGACATCGACAGGCAATGGCAGCGCGGGCGCTC	..(((((((.(.((((((((((((..((((((((((.((.(((.(((..((((.((((....))))............)))).))).)))...)))))).)))))).))))))).))))).)..)))...))))(((....)))..	-53.6	B2-m0088-5p	-	5	5	-	TGGATGTGAGCAGGCACATGA	-
	novel_mir_97	Chr7:18555300:18555550:+	CCGTCGTCCTCGTCGTGGCCGCCCCCGCCTCCCCCGCCGCCGGACGCCTCGCAGGACCCCGATCTCGCGCCGCGGGAGGCCACCACCCCGCCGGCCTCCTCGTCCTCGCCGTCGCCGCGCGCGTCGGCCAAGGCGAGGGCGTCCGCCGCGGCGGCGGACGGGCTCGCCTCCGGGGTCGCGGCGCTCAGCTTCGAGGAGCCGCTCGGCGCCGGCGCCGGGGAGGACGGGTACGACTACGGCAAGGGCGACTT	..((((((((.(((((((.((..(((((((((((.((.(((((.((((..((.((..(((((.((.(((((((((((((((...........))))))).((((((((((...(((((....).))))...))))))))))...(((.(((.(((((......))))).))).)))))))))))..))..))).))..))))..))))))))))).))))))).))))..)).))))))).))))))))..	-163.7	-	B2-m0089-3p	8	-	8	-	AGGACGGGTACGACTACGGCA
	novel_mir_68	Chr7:538371:538488:-	GTGATATTCCCCTGTGACATTCTCGGTGACATTGAGTCACTGACATGTGGGTCCAGACACATGTGGGTCCCACATGTCAGTGACTCAATGTCACTGAGAATGTCACGGGGGAATGTCA	.((((((((((((((((((((((((((((((((((((((((((((((((((((((........)))).))))))))))))))))))))))))))))))))))))))))))))))))))	-102.7	B2-m0090-5p	B2-m0090-3p	32	1	31	GTGACATTCTCGGTGACATTG	ATGTCACTGAGAATGTCACGG
	novel_mir_98	Chr7:6418469:6418621:-	ACCAACTTGCACGCATTTAGAGATCCTTCATTGGACATGTACGTGAGCATGAGCACGAGCACGAGATTCATCATGTGGCAGAGCACGAGTAAGCTACCCCAATGGATGTAGTCGCAAGCTACCCAATCTAGGACTGGCAGCATGTAAACCTGG	.(((..(((((.((..((((...((((..(((((.(((((......)))))......(((....((((((((...(((...(((........)))...)))...)))).))))....)))..)))))..))))))))..)).)))))...)))	-37	-	B2-m0091-3p	125	-	122	-	CCAATCTAGGACTGGCAGCAT
	novel_mir_99	Chr7:6703796:6704079:-	GTGCAAACGGTCCGACCGGCGGCGACAGAACTACGTCGAGATTTCCATCGATTCGAGGGTAACTTTTATTTCCGCTAAAAGTTTTTGGGTTTTTGGTTTTCCTAACTATTCACTCCTCTCTGGTAGGCTTGGTTACTTGTATTCGATCCTACAGAAACTTACCTTAAAAAATGAATCTGAAAAAAAAACTCAAGAGTCCACACTAGTGCTATATATACTTTCATGCATTCGGCAAATAGCCTTGTCTTCTCGTACTCTGTTTTGCTTGTCTGGACTAGCTTAGT	........((((((((.(((((.((((((..((((..(((((..((.(((...))).)).((((((((.......))))))))..(((((((((((((((.......(((((.........((((((.(((.....(((....))).....)))...))))))........)))))........))))).))))))))))....(((((...............))))).(((.....)))..)))))..)))).))))))))))).))).)))))........	-62.4	-	B2-m0092-3p	17	-	17	-	ACTCTGTTTTGCTTGTCTGGA
	novel_mir_277	Chr8:2470868:2470965:+	CAGGAGCAAACAATTATGGCATGAATGACTACAGTAGAGCCATCGACTCCTTCAATCCTGGTACTTCATGCTTCAGTAAGGGTTCCTCATGCCTCCCG	..(((((((((..((((((((((((..((((..((.(((...........))).))..))))..))))))))...))))..))).....)).))))..	-20.1	B2-m0093-5p	-	5	5	-	CAATTATGGCATGAATGACTA	-
	novel_mir_107	Chr8:18588098:18588212:+	CAACTTGACAGCGATCAACCCAGTTCTCTGGCACACTGCCCCCGGTCGTTGGATGCTGGCCTCGTCAATGACCTGATTAATATACAGTAGAGCTGGGACGTTCGATATGCTTCTT	...........(((.(..(((((((((((((((...)))....((((((((.(((.......)))))))))))...........))).)))))))))..).)))...........	-32	-	B2-m0094-3p	17	-	16	-	CAGTAGAGCTGGGACGTTCGA
	novel_mir_108	Chr8:18672868:18672961:+	TGGATCGGCCACACAGAGTCGCGCAGTGGTACACTTTGGCCGGTCGAATGCCCTCGCCATTTTCTCTTGTGGTTGACTTTTTGTGTTCGATCCT	.(((((((.((((.((((((((((((.((.......((((.(((.....)))...))))....)).)))))..))))))).)))).))))))).	-33.3	B2-m0095-5p	-	90	90	-	ACACAGAGTCGCGCAGTGGTA	-
	novel_mir_109	Chr8:2458805:2458892:-	TCAAACTGATCCAGGGAATTGAGTGTATGGCGGCTAAGCTCATTGTAGCCACTACGGCCCTACATGTCAGCTCCATGGGTAGTAGGAA	((..(((.(((((.(((.(((((((((.((((((((.........)))))......))).))))).)))).))).))))))))..)).	-28.3	B2-m0096-5p	-	11	11	-	CCAGGGAATTGAGTGTATGGC	-
	novel_mir_110	Chr8:5732641:5732915:-	ACTAGCTTTGTGATCTTTGTTCAGCTCTGGTGGCCAAACTCCCAACACAATCTTAGCAAGAGCCATCTAATATTTACTCCATGGCTATGATCACCAGCTTGACACTTCATTCATTGTAAATGCTATATAATTTGATGGTTCTGCATAGTTCAGGGGAATACATAATAAAAGGTCCCCACATCTATTTATTTAGAAAGAGAACTTGATAGAAACAGGATATTGGGAAAAAAAAACTAAGTGGTTGTGATCAAGAAGAACAGGAGGTGATGAATTAG	.((((.(((((.((((((((((..((.((((.((.....((((((......((..(((.((((((((((.(((((((...((((..(((((((......)))....)))))))).))))))).))........)))))))))))..))....(((((...............)))))...((((......)))).......((((.......))))...))))))......((((....)))))).))))))..))))).))))).)))))))))	-55.7	-	B2-m0097-3p	6	-	5	-	TGATCAAGAAGAACAGGAGGT
	novel_mir_278	Chr8:18567100:18567198:-	TGCCATGGGCATCGTGTGGACACGTGTGCTCAACCCTGTGTTGTGGGATCACACTTGTCACTAAGGAAGAGCACACGTATATGTCGGGCCACCATGGCC	.(((((((((.(((((((...((((((((((..((..(((..(((......)))....)))...))..)))))))))).)))).)))))..))))))).	-40.7	-	B2-m0098-3p	6	-	5	-	GAGCACACGTATATGTCGGGC
	novel_mir_115	Chr9:6762900:6763017:+	TTTTCAATCTAAAGACTGATAAGTAGATCGAGCAGATAGATGTAGTATTAGCTTCCACGTGTCACCTCCTCTACTCTTGAACTATATATGAGATCGTTGGCGGTAACTAGATAGAGCT	........((((.((((.(((.((((.(((((.((.((((.(..((....((......))...))..).))))))))))).)))).))).)).)).))))..................	-20.6	B2-m0099-5p	-	18	18	-	AAAGACTGATAAGTAGATCGA	-
	novel_mir_116	Chr9:9021971:9022217:+	CCGCCAGAGTTGTAGCATGTAGGGAAGGTTAAATCCATTTGGGTATGATGAAGTGTTATTCGAAAGGCTAGACGATTGGCAGCACATCTTGCTGCTAATTTGCCATTTTTTAGATAAAAAAGCCAAGCCTTCTAAAAGGAATGTTTGATGTACCTAGAGAAGTCACTACCAAACAGAAGAATTTGACTGTAATAACAGCTGCAGATTGATCCTTAAAATTCTGTAAAAGTGCTCAACGAAGTGGTGA	.(((((..((((.(((((.((.((((..(((((((.((((((((((((((((......)))....(((.....(((((((((((.....))))))))))).))).((((((((.((...((((....((((....))))...))))....)).)))))))))))).))))...((((....)))).((((....))))...))))).)))..))))..)))).))...)))))))))....))))).	-62.1	B2-m0100-5p	-	60	59	-	TGTAGCATGTAGGGAAGGTTA	-
	novel_mir_119	Chr9:9324265:9324429:+	TTGGCTATTACAGAGAAATCCAAATCGCGTGCTTTTCTAGTGAAAGACAGGTATTATTCACATCATATTCTTTTTCGTGTGTTCATACTCGTCAGTGTTTAACATGTTTTTCCTTTTTTTTTACCGTGCTGATATGAGGTTTGCATTTTATTCTGTAATTTCTCT	..((..(((((((((((((.((((((.((((........((((((((.(((........................(((((....(((((....)))))...))))).....)))..))))))))........)))).)))))).)))))..))))))))..))..	-29.2	B2-m0101-5p	-	22	22	-	CAGAGAAATCCAAATCGCGTG	-
	novel_mir_163	Chr9:19261805:19261888:+	ATACTCCCTCCGTCCCAAAATATAGTTGCCTTTGTAGTTCAAACAAAGGTACAAAGGTAGCTATATTTCGGGACAGAAGGAGTA	.((((((.((.(((((.(((((((((((((((((((.((.......)).))))))))))))))))))).))))).)).))))))	-45.4	-	B2-m0102-3p	11	-	11	-	AAGGTAGCTATATTTCGGGAC
	novel_mir_146	Chr9:8887629:8887837:-	GTGGAACATGAACAGCAAGACTCTGTTGCATAAGTGCATGTTTGTTGAACTGGAACTGTATACGAAGGCATTCGTATGAAATTTGATTGAGTTGTGCTCCTCCAAAACAGTTCAAACAATATTCTGCTAGAGATTAACATCCAGGGAACGTTGAATTCATATATTATTAGTCTTTCCATGCAAATCAGAGACTCTGGTGTTCAGTCCAG	.((((.(.((((((.((((.(((((((((((....(((.(..(((((.....((((((((((((((....)))))))....((((...((((...))))...)))))))))))...)))))..)))).(((((((((........(((.......)))........)))))))))..))))))..))))).)).)).))))))))))).	-53	B2-m0103-5p	-	14	14	-	AACAGCAAGACTCTGTTGCAT	-
	novel_mir_75	Chr9:18868646:18868929:-	CGCGGTCGCTGCTCGCCGTCTCCGACTACTTCCACCGCCTCCGCACCCTCAGCTCCCTCTGGGTCACCCGCCCCAGGCACCCGCCTCACGACCACCAGCCGCCGCCGCACTCCGCCGCCCCCCACACCTGAGATCACCGCCGCCGGCAACGCATGCAAACACCGTAGCTCTTAGCTAGCAGCTTAGAGATATCGAGAGATCAGAAATTAAGCGATCGATCGAGAGAGGACGACGACTGTGAAACCCCCCATGGAATGGATGGATGGATGGATGGATGAACCGAT	..((((.....((..(((((((((.(((.(((((.........(((..((..(((((((.((((.....)))).((((....))))...........((((.((.((..(((.................))).....)).)).))))......(((.......))).((((.((((...)))).))))...((((..((((...........))))..))))))).))).)..))..)))..........)))))))).))))..)))))..))....))))..	-68.1	-	B2-m0104-3p	18	-	18	-	AATGGATGGATGGATGGATGG

## Sheet: B3
	miRNA ID	Location	miRNA precursor	structure	MFE	Id(5p)	Id(3p)	count	count(5p)	count(3p)	mature miRNA (5p)	mature miRNA (3p)
	novel_mir_279	Chr10:21953807:21953892:+	ACATTGATCCGCTTTGTTGCGTCGATTGGAGGAACGACTCTTCTTGTGCGTGCTTCCTTCATTGATGCATCAACGCACACTGCTAT	..........((.(((.(((((((((.(((((((..((.(.......).))..)))))))))))))))).))).))..........	-27.1	B3-m0001-5p	-	8	8	-	GCTTTGTTGCGTCGATTGGAGGA	-
	novel_mir_2	Chr10:14220313:14220408:-	AGACATCTGGATATCACTTCTGATGTATTCCTTGGTGTAAGCTACTGAGATTTGGTATGGTAGTTTCTGTGGCACTTGCACAAGGACCAGTTTTAT	......((((((((((....))))))..((((((.((((((((((.((((((.........)))))).)))))..)))))))))))))))......	-28.1	-	B3-m0002-3p	33	-	33	-	TCTGTGGCACTTGCACAAGGA
	novel_mir_280	Chr11:14073837:14073991:+	TGCAAATCAAATTAACATGCAATCTCCAATATTACTTGATCTCAATTGATGGGCTGCACAGGTCCTACATTTGCACATCGTACTCCATGTGGCTGGCCGTAGAGGATAGGGTGGAGTCCACCGGTGATGGAGATTGTTTGCTATTTTTCTTTTGC	.(((((..(((.((.((.((((((((((...(((((......(((.((..(((((.....)))))..)).)))(((((.(....).))))).(((.((.....)).)))(((((...)))))))))))))))))))).)).))..)))..)))))	-44.2	-	B3-m0003-3p	7	-	7	-	TGATGGAGATTGTTTGCTATT
	novel_mir_148	Chr11:15497332:15497597:+	GGCAGCCGGCGACGAGCCCCTCCACGACGGAGCTGAGCCCGGAGTGGTTGACGAAGCAGCCCACGCTGCGGTGGCGCAGGATGTGCTGCTGCTGCACCCACCCGGTGTGCAGGATCCCTCTCCCCTTCACCCTCTCCTCCAACCCCGGCGGCGTGAGCTTCCTCAGCTCCGCCTCGGCGTCCGTGCCCTTGGGGAAGTTGAGCACTGCGAGGAACGGCAGGGCGGTGGCCTCTAGTCCGAGGAGGAGCTCCGTCGCGGCGGCGTGC	.((((((((((((((((.(((((.((((((((..(((.((((.((((.((....((((((.((..(((((....)))))..)).))))))....)).)))))))).(((.(((..........))).))).)))..)))).((.((((.((((.(((((.....))))))))))))).))((((..(((((.((..........)).))))).))))..((((....))))...)).)).))))).))).))))))..)))).)))	-126.9	-	B3-m0004-3p	7	-	6	-	TCCGAGGAGGAGCTCCGTCGC
	novel_mir_266	Chr11:24918909:24919175:+	ATACATATGGTGTGATTGTGAGACGTTGTACCAACAGAGCTCAGTGGTTGTCGTAGTCTTGTTCACGATGCCTCCTAGACCTAGCTACCATGTGTTGAGTAAGGTAAGGATGTAAAATTTTCAGAAGGATTTCAATTCTCAGCAACCGTAAATTTGTGATCGATCAAAGCTTGTCCTTGTTGCTAATTGAGAGAGTGAGTTCATGAGAATAATAGAAGTACACGCGTACTCCCTCCGTCACATAATATAAGAGATTTTGGGTGTATT	((((((...(((((((.(.((((((((((((.(((((.(((..(.......)..))).))))).....(((.((((..((((.(((..((.....))))).)))).)))).)))..(((((((...((((((..((((((((((((.((((.((((........))))..))).)...))))))......)))))))))))).))))))).......))))).)))).)))...).))))))).................)))))).	-54.8	B3-m0005-5p	-	6	6	-	TGTGATTGTGAGACGTTGTAC	-
	novel_mir_9	Chr11:12147701:12147994:-	GTTGGTCCAATTAATCGTCGATCAGGCACAATTAATTGTCCGATCAGAGCACCTATCGATCACCTTTTGAACAATTCTTAGGGTTTAGCACATGTGAATATGTGCTACTACTGCTGGTTGCTTTATACTAGGGCAAGTGACCATCTTGCCATCAATTATTAGTGCTGTGATTGCTTTATACTATGCACTATATAGAATATAGGTTCTAGTATTCATAGTACTGATCAGGTCGACTAATCGAGGCTGATCGACGATTAATTTTCCTGGTCGGTCCCTTGGTGATCAGGATCAATC	........(((((((((((((((((.(.(.((((.(((.((((((.((.......))))))(((((..(((...)))..))))).(((((((((....)))))))))......(((((........)))))((((((.......)))))).......(((((((((((((.((((..(..(((((..((....))..)))))..)..)))).)))))))))))))..)).))).)))).).).))))))))))))))))).(((((((((.(.....).)))))))))......	-102.6	B3-m0006-5p	-	30	30	-	TTAATCGTCGATCAGGCACAA	-
	novel_mir_10	Chr11:16493226:16493515:-	ACCGGCACCGATTTGTGTGTCTGTAGCGGTGTGTGACAATTACATCATGGATGAGCTCGCTTGTTCCCGTGAAATCGTCACCGAGTTCGCGCAGCATGTACGCGGACTCTGCCCAGAAATCTACTACCAACGAGAACTCGTTGCAAGTTCGTTTTCTGCGCACGCAAGTCATTTACTAATTGTTATATTTTGGGACGAAAGGTATTTTGGGACGGAGGGAGTAGTAGATATACGATTTTTATTAAAACTGTGTTCAGTACAGACTGACAGGTACACACATTCACTAATTA	.........(((.(((((((((((..((((.((((.........((((((..((((......))))))))))..(((((.(((((((((((.........)))))))))(((.((((((...(((..((((((....))))))..)))....)))))).))).((((............))))........)))))))...........(((((.((....(((((((.........)))))))...)).)))))..)))).))))))))))))))).))).........	-79.7	-	B3-m0007-3p	9	-	9	-	CAGACTGACAGGTACACACAT
	novel_mir_281	Chr11:20800999:20801269:-	TCCCATCCCAATCCCGTGCACTGTGGCGGATCCAGAAAATCGATTCGTTGGTGTCATAACGTGTCTAACGGTGTCATAGTATACTAATTATGCTTAGATCATGATGTTATAACATATGAATAAGCAGTTTTGCTATACCTTTTTACCGAGAGTCGTCGGTGTCGCCTGACACCGGTCCTAGTACGTACTATAGATCCGCCCGTGCAGCACTCGAGCAGGCAGCGGCGAGCCAGCGGCGAGTCTGTCGCAGCACCACGGGAACGGGAAGGCG	..((.((((..(((((((..(((((((((((........(((..((((((((......(((..(((..(((((.....(((((.(((...((((((..(((((.(((....)))))))).))))))...))).))))).....))))))))..)))(((((((....)))))))(((.((((....))))..))).((((..(((.((......))..)))..)))).))))))))))))))))))))))...)))))))..)))).))..	-101.4	B3-m0008-5p	-	13	12	-	ATCCCGTGCACTGTGGCGGATCC	-
	novel_mir_12	Chr11:24920007:24920082:-	AAGCATGATCAATGGGATTGAGGGGTACCAGGAAAGAACACCTTCCTAGATTTCTCAGAACGGTTGTTGTTCTGCT	.((((.(((((((.(..(((((((((.(.(((((........))))).))))))))))..).))))..))).))))	-22.2	-	B3-m0009-3p	8	-	8	-	CTAGATTTCTCAGAACGGTTG
	novel_mir_13	Chr12:2441355:2441614:+	GCCCGCGGCGGTGGGGCGGCGGTGGTGGCGGCGAAGGTGATGGACAGGAAGGAGCTGGCCGGGAGGAACAAGGAAGGGCGGGCGAGAACCGAGAGGGAGATCCTCGAGGCCGTCGACCACCCCTTCCTCCCGCGCCTCTACGGCGTGGCCGAGGGGGATCGCTGGTCCTGCCTCCTCACCGAGTTCTGCCCCGGCGGCGACCTCCACGTCCTCCGCCAGCGGCAGCCGCACCGCCGCTTCACCGAGTCCGCCGTCAGGTA	(((.((((((((((((((((((((.(((((.((..((((..((((.(((.(..((((.(((((.(((((.((((((((..(((((...((..((((.....))))..))...))).))..)))))))).(((((((.....)))))))..((((((((((...)))))).))))........)))))..)))))))))..).)))..))))..))))..)).).)))))))))))))))))))......)))))..))).	-149.5	B3-m0010-5p	-	5	5	-	GTGGGGCGGCGGTGGTGGCGG	-
	novel_mir_123	Chr12:9434249:9434520:+	CGAGCACGCGGTCGCGAGGAATCCTGCCGGGCTTCTTTTCCTCTCAAGTCAACGACGCGCGTCACACCACACGTCTAGGTAGACGTTTGTCCATGAACGATCGCGAGGCCCCGCCGCGACCGCCCGCGGCAGCGATCATCGGACGGCGCCGAGGGGCACACGGAAGGATCGGATGGTCCATGCGCGCGCTGGCAGCCTACGCAAGTAACGCAACCCGTGCGACTGCCGGCCGCGTCGCCGCGAGGAGATCAGGAGGCAGGAGCGCGTGCGTT	...(((((((.((.....)).(((((((...(((..(((((((.(...(((..((((.(((((..(((.........))).))))).))))..)))....(((.(..(((((.(.(((.((((((((....)))......)).)))))).).))))).).)))..(((((....)))))..((((((((((((((..(((....))).((((.....)))).))))))).)))).))).).)))))))..))).))))))).)))))))...	-112.5	-	B3-m0011-3p	7	-	7	-	GAGGAGATCAGGAGGCAGGAG
	novel_mir_15	Chr12:15176235:15176307:+	TGCCATGGAACCTGCCTGATTCCTGTGCTGTATTGAATAAAAAGTTAGTAGAGGCTTGCAGGTGGAAATGGCG	.(((((...((((((..(...(((.(((((.(((........)))))))).))))..))))))....))))).	-26.5	-	B3-m0012-3p	6	-	6	-	AGTTAGTAGAGGCTTGCAGGT
	novel_mir_16	Chr12:15283679:15283799:+	AGCGTACAGTAGATGTGACTGTGTATTGCATGGTGGTTGGATTGGGAAGCATCAGGAGCTCTTATGGATGTCACCTTCCCTCCAAACCAATCCAGAGATCGCGGACAGGTTGCCATGTTGC	.(((.(((...(((.((.(((((.(((...(((((((((((..(((((((((((((....)))...))))....))))))))).)))))..)))..)))))))).)).)))....))))))	-36.5	-	B3-m0013-3p	16	-	16	-	TCCAGAGATCGCGGACAGGTT
	novel_mir_18	Chr12:17949899:17949979:+	GTCGTCGTCGAACCATCGCGTCGCGTCCCCGTGTCTGTCGAGCGAGATGGATGGATGGATGGATGGATGGGACCGGACGAG	.(((((......(((((.((((.(((((...((((((((......))))))))...)))))))))))))).....))))).	-34.8	-	B3-m0014-3p	15	-	15	-	ATGGATGGATGGATGGATGGG
	novel_mir_20	Chr12:18190759:18190899:+	TACATGTGTAGATCTAATGATGCGTTCATGCTAGTTTTCATCTGTAATGTCATGATTTATTTATGGAATAGATTAAATCATTATATGTCTATAATCTCAACACTTTGTTCCAGCTAGCAGAACTATCGCGTTCCACATGAA	..((((((..((.(...(((((.((((.((((((((......(((((((...((((((((((...))))))))))...))))))).............((((...))))..))))))))))))))))).).))))))))..	-31.8	-	B3-m0015-3p	18	-	18	-	CAGCTAGCAGAACTATCGCGT
	novel_mir_21	Chr12:18292723:18292803:+	TGATCTGGCACAAGGCAACCTGTGGAGGGCACAATATGTATTTCCAAAACATGTATTCTAGAGTTTGTCATGGCCAGCAAC	....(((((.((.(((((.((.(((((.(((.....((......)).....))).))))).)).))))).)))))))....	-23.9	B3-m0016-5p	-	17	17	-	CAAGGCAACCTGTGGAGGGCA	-
	novel_mir_151	Chr12:25219058:25219145:+	ATTCTTCTTTTAGATGAAGCTAAAACTGTTTGTCAGGGTTTAGATCACCTCTGAAAGTTAGAACTCTGCCAAACAGGGTGAAAGAGAG	.((((.((((((.............(((((((.((((((((.(((...........))).)))))))).)))))))..))))))))))	-21.5	-	B3-m0017-3p	12	-	11	-	AGTTAGAACTCTGCCAAACAGGG
	novel_mir_126	Chr12:14944199:14944386:-	CTGTGGTAATGCTAGATCGGCTGGTCAAACAGTGTGCAGGTGACAAGACTGTGCTACGACTGAGGACCATGCGGCAGTGTGGGGAATATCAATTGGGACAGAAGATACAATGAAGATGAGTAAAATTGACGTTTTGAAATTCTTCTCCTTCCAGAGGACTGATGGCTGGATTGGATTGGAAACTAAAT	..((..((((.((((.((((((((((...((((((((((((......))).))).)).))))....((((((....))))))..........((((((.((((((.....(.((((((...........)))))).)...))))))..))))))..))))...)))))).))))))))...)).....	-41.5	-	B3-m0018-3p	23	-	23	-	ACTGATGGCTGGATTGGATTG
	novel_mir_31	Chr12:18102039:18102221:-	CAGCCTTGTGCCTAGGCTTCCATGTGGTTAGGGGTCGATAGTAGAGCTTCTGCTCACCATCCATGCCTGAAGAAGGGAACAGTGGACCTAGTCCAACAACCAATGTGGTTAATTTCCCCCACAAAATCTGTAAAAAGTGAAACTTTGTTGCAACTTTCATGGAAGATAGGCTCTCTTTGGCTT	.((((..(.(((((..((((((((.(((((((.((.(((.((.((((....)))))).))).)).)))))....(((((...(((((...)))))..(((((...)))))...)))))..........((((((((((...))))).))))).))..)))))))).))))).).....)))).	-58.2	-	B3-m0019-3p	14	-	13	-	ACTTTCATGGAAGATAGGCTC
	novel_mir_42	Chr12:24620003:24620266:-	GCCTTCGCTGCGACGGCGATGAATAAGCGGCTCAGGCCAGAGCCGCCGCGAATCCGTTGAGGAAGCTAGCACCACCAGGGACACACAATTTTTAGTCAGATGTCTAGGGGGCGCTTGGTTTGGATCTTCTCCTTTTCCCCTTCTTTTTTTCTCCCTTTTTTTGACATAAGTTTCCAAAATATTTATTAGGTTCTTTGAGCCATTGCCATTGGTTGGCATTTGGCAAATGTTGTTGGATTGGATTGGTTTGGTTTGTGAGAAGGA	..(.((((((...)))))).).....(((((((......)))))))......(((.((..(.(((((((.((((((((...((.(((((.(((.((((((((((.((((((.....((...(((...........)))....))......)))))).........((((((.........))))))..(((((...)))))...(((...))).))))))))))))).)))))))..))))..))))))))))).)..)).)))	-71.8	-	B3-m0020-3p	13	-	12	-	TGGATTGGATTGGTTTGGTTT
	novel_mir_36	Chr1:34261987:34262054:+	CTTTTACGCTCCAATTGGGTTCGATCGTGTGAGTGTACCCGCGAATCAAGCGGATAGGAGTAAAAAGA	(((((..(((((.(((.(.((.(((((((.(......).)))).))))).).))).))))).))))).	-19.8	B3-m0021-5p	-	8	8	-	CCAATTGGGTTCGATCGTGTG	-
	novel_mir_282	Chr1:34262196:34262502:+	GACGACGTAGAGATTCTGGCTGGGCGCGTTCTCTATTCTTAATTCCATATCCTTTTCACTTTATATGGCCCAGTTTTATATAGCCCAACCACTCAATAACTTGTACACGCCAGCCACATCCACAGCTCTCGCACTGTGCTGATAGCTTGCCGACGACCACCTAGCAAGCTTCATTCTGATGCCAAAGGTTGATAATGGCAGCGTGGTGACCGACTTTGAGATGATGCCAGGTCAGGTGGCATCACGCCGCAAGAGAGGAACCGGAGGACTGTCTCGAGAGGATAGCCAGCCATGTCTCTAGATCCTT	...((..(((((((..(((((((.(..(((((((.........(((...(((..(((.((((...((((...(((......))).......(((((.........(((((..((((......((((.(.......).))))..(((((((.............)))))))(((.(((........))).)))...)))).)))))..........))))).((((((((.......)))))))).))))....)))))))..))))))........))))))).)))))))).)))))))..))...	-89.9	B3-m0022-5p	-	10	10	-	AGATTCTGGCTGGGCGCGTTC	-
	novel_mir_283	Chr1:42783917:42784212:+	TTTTTTAGACGTTTTATTTTCGCTATTTTTTGGGAGTCGGACTTCTTTTCCGCTTTTTTTTCCGGATGGCTTTTTTTGTCGGAGACGGTTGAATCGGGATGTGACTATTATAAAGTTGTGAATTTTTTAAGTAGTTAAGGTTTTTTTTTACGGGCTATGACACGGGTGATCGCTGTTAAGGAACAGGGACGATGCAACTTAATTGGAACACTAAGCGGATTAGGATGACGTACCAAACGGACCAACAAAAACATCTTCAATTTTTATAATAGTAGAGATAGGACAGCTCTATTCTA	.....(((((((((((((((.((((((.(((((..((((...((((..(((((((....((((((((((((((....((((.(..(.(......).)..).))))......))))))))...........((.((((.(((((........))))).))))))(.((..((.(((((....))))).))..)).).......))))))....)))))))..))))))))...))))).(......).....................)))))).)))))))))).).)))).....	-63.3	-	B3-m0023-3p	5	-	5	-	ATAATAGTAGAGATAGGACAG
	novel_mir_42	Chr2:5209900:5210119:+	CATCAAATGGGTTCAGGAGTCGTTTCCGACAGGCGGGGATTGCTCCGGGTTGGTGGTGATCTACGAGCAGTGCGTGCGTGCCTTCTGGCACGACGACCGCTACAAGAACGATCTCCGCTACCTCAAAGTGTGGCTGGAATATGTGAGTTTCATGAATTCAGGATTGGTTCTGAGGTGGATTGGTTGGATTGGATTGGATTGGTTTGGTTTCCTTTTGACA	.(((((((.((((((...(((...((((((...(((((....))))).(((.((((....)))).)))....(((.((((((....))))))))).(((((...(((((((((((((((((((...)).))))).))).....(((((((...))))))).)))).)))))..)))))....))))))...))))))))).)))))))............	-75.5	-	B3-m0024-3p	13	-	13	-	TGGATTGGATTGGTTTGGTTT
	novel_mir_44	Chr2:13848913:13849080:+	GGAGAGGGAGGGAGGGGGCGGCGCCGCCTGATGGGAGGGGGAGGGGAAGCGGCGGCCCTCTAGCCTCCCTCCCGCGGCAGATCCGCTGTCGCGCCGCCGACGCCGTCTCTTCCCCTCCCCCCAGTCAGCCGCCTCTCCCGCCACCGGCGCCGCTTCCCTTCCCATCTC	.(((((((((((..((((((((((((..((.((((((((((((((((((.((((((..((..((........((((((((.....))))))))..)).)).)))))).)))))))))))))..............))))).)).))))))))))))))))))).))))	-101.3	-	B3-m0025-3p	10	-	10	-	CCGCCACCGGCGCCGCTTCCC
	novel_mir_284	Chr2:3563206:3563471:-	GCTCACCCTAGGCAGAGCGCGCCGCCGTCGAGCGGCCTTGCAACGGTGTGGTCGGCGCCCTCTCGTCTCCCCCCGGCTTCGGCGACGGCCGGCGACGGCGGTGGATGGGGAAACACGGCGGCGCCATCTTTTCTTTTCTCTTCTCTTCTCCCCCCACTGTCTCTAGCCCCCACCGCGAAATGAGAGAAAGAGGGTGGCGGCCGAAGGAGATGGCGGCGCCGCCGCGGGCCTCCTCGCCGGTGCGCGCGTGCACCCGCGGGTGCGCG	((.(((((..((....(((((((((((.((((.(((((.((...(((((.....))))).((((((((.((.(((.(.(((((....))))).).))).)).)))))))).....(((((.(((((((((..............((((..((.(((((..((((..(.(.((........)).).)..))))))))).))..))))))))))))).)))))..)))))))..)))).))))).))))))....))..))))).)).	-126.8	B3-m0026-5p	-	7	7	-	GGCAGAGCGCGCCGCCGTCGAGC	-
	novel_mir_47	Chr2:20249942:20250211:-	GACCGCAACTGTAAGGATGACAGAGAAGCATCGATGTTGTCCACCTCTGCGTTTCAACTAGGTACATCTCTTGGGGCCGTACCTATGATTTGTGGATTGCTCAGTATTCATGGTAGCACACATGCCCACTGCACACGCTGCAAAATGAAGATGAACACGCTTTAGGCTTTCGCGTAAGACAACAGGATTCTTAGTGCCGCCCATTTCTATAGTTAAATTGGACATAAAACGCGTATGAGCATGTTGGTTAGTCCCTTGTCAGTTGTCACC	....((((((((((((.((((.((.(.((.(((((((((((((..((((((..(((..(((((((..(((...)))..))))))))))..)))))).((.(((...(((((.(((((.....(((.....)))...)))))...)))))..))).)).......(((...(((.(((((.........))))))))..))).................))))))......)))).))))).).)).))))...))))).)))))))....	-65.4	B3-m0027-5p	-	5	5	-	GTAAGGATGACAGAGAAGCAT	-
	novel_mir_48	Chr2:20404010:20404112:-	AAAGCTGCGGATTTGCCTCCGGTCAGGTACGGAACAAATATAATGCGTGCAGACGGCGATGAGATGCGTGCCATACTTGATCGCGGCAAGGATACGCCTTACA	......(((..((((((..((((((((((.((.((..((...((.(((.......)))))...))..)).)).)))))))))).))))))....)))......	-30.3	-	B3-m0028-3p	6	-	6	-	ATACTTGATCGCGGCAAGGAT
	novel_mir_214	Chr3:1468912:1469119:+	TTGGCTGACGTCCATTGTTGGATGTCGGAGCTACTTTTCGCTTTGGTGACTTTCGTGGCTTCAGTGTTGCTGCAGTTGTGGAGTCGGCGCTGCTAGGTCGCTTGGGCGGCTAGCTTAGCAATGGTAACACCTCTTCTGCAATGTGGGAGCTGTTGTGTCGCTTTTGTGTTTAGTTTGGCAGTGACGTCCTACGATTAGGCTCCGCCGT	.((((.((.(((.(((((.((((((((..((((((...(((...((((((......((((((..((((((.(.((..(((..((((..((((((((.((((....)))))))))..)))..))))..)))..)).).))))))..)))))).....))))))...)))...)))..)))..)))))))).)))))..))))).)))).	-75.4	B3-m0029-5p	-	21	20	-	TCCATTGTTGGATGTCGGAGC	-
	novel_mir_42	Chr3:5579170:5579507:+	TTGCTGTTGGGGCCTCAACATCAGCGAGGCATTTCATTTCAGTACCAGTCAGGAGGCAGCAGCTGCCGGCCTCGTGACGGCGCCCAGTGCATACTACGTGACAGGGCCCGGCAGAGGCAGGTCGAGGTTGACGGTGATGAACAGATATTTCGGATGCATGCATGGGTGCAGCCATGCGTTTAAGCCTGCTAATGGGTTGGGATAAAGTGAGTAAAATGGATTGTTTTTAAGTTTGGGTTGTCTTTGGTTGGATAGAAATGGGCTGAGGAGGCTAATGGGTTGGAGCGGATTGGTCCACATGTGGAAATGGATTGGATTGGTTTGGTTTTTAATAGGTT	...(((((((((((((..(.(((((....((((((..((((..((((((((.(((((.((....))..))))).))))((((((((((.(((..(((.(.((....((((((...(((((((((((((.....((.....))....)))))).....((((((((......))))))))....))))))).....)))))).....)).))))..))).))............)))).))))..))))))))..)))))).))))))))))))........(((.(((((((((((((((......)))...)))))))))))).))))))))))...	-103.5	-	B3-m0030-3p	12	-	12	-	TGGATTGGATTGGTTTGGTTT
	novel_mir_42	Chr3:5579560:5579697:+	CATGTGGAAATGGATTGGATTGGTTTGGTTTTTAATAGGTTGGGTTGAAGCGGGTAAAATGGATTGGTTTTAAGTTTGGGTTGTCTTTGGTTGGATGGAAATGGGCTGAGGACTGGACCAATCTGCTCCAACCCATGC	((((.((...((((.(((((((((((((((((((..........(((((((.(((.......))).)))))))(((((..((((((......))))))...)))))))))))))))))))))))).)))).)))))).	-38.8	B3-m0031-5p	-	12	12	-	TGGATTGGATTGGTTTGGTTT	-
	novel_mir_154	Chr3:29333218:29333471:+	AAGCTGCGACAAACTTTCCTGGTCGCGTCGGGGAGGAGCGGCGTCTATATTCTGAGAGCGTAAGGCTGCCGGTGAAGAGCCAATCCCAGTCTCCTGTCCTCTTCTCACTGCTCCACTTCCCTCCCGAGAGCTTCTTCCCCTCCCGGCTACCCTCAGTAGTCCTTCTCGATCTGGCCTGAAGGTCACCGGTGGCAATCCCCAGCCGCCAGATGCCACTCCTCCCCGACGCGACCAGGAAAGTTTGTCGCAGCTTT	((((((((((((((((((((((((((((((((((((((.(((((((.....(((((.......((..(((((.((((((.......(((....)))..)))))).....(((((...........).))))...........)))))..)))))))..(((......))).(((((....)))))..((((((........))))))))))))).)))))))))))))))))))))))))))))))))))))).	-134.6	B3-m0032-5p	-	87	85	-	AAACTTTCCTGGTCGCGTCGG	-
	novel_mir_50	Chr3:32511910:32512120:+	ACCACATGCAAGTGCTATCATTTCACCTACATCGTTTATTAGCTACCAAAATAATTTTTTGAAAGAACTTTTATATATGTGTTCATAGCAATTTAAAAGCTAATGATGAAAAATAAATTACAGCAAAAAAATCAAAATTAACTCTTTAAGAAATATCGGAGCTGGTGAGAAGCAAAGAAAACAAATGTAGAGAGAATGGTCGTGCGATGGA	.(((..((((.(.(((((..((((..((((((..((((((((((.((...(((.(((((((((.((((............)))).((((.........)))).((((.......................))))..........)))))))))))).))))))))))))...............)))))).)))))))))).)))).))).	-32.5	-	B3-m0033-3p	13	-	13	-	ACAAATGTAGAGAGAATGGTC
	novel_mir_18	Chr3:36271499:36271667:+	AGGAGAGGTTATGGATGGATGGATGGATGGGATTGGATTCCCCTTCCCCCGCCCCCAACTAAACAAACAACTAGTATATGCTAAGGGCGGCGCAACGCTAATACTCCTCCCTAGTCCTCCTAGGCTACTCCTCTCCTCCCTTCCATCCATTCACCCTTCGCTTCATCCG	.((((((((...((.((((((((((((.((((..(((.......))).((((((.................((((....)))).))))))...................(((((.....)))))............)))).)))))))))))).))...))))).))).	-55.8	B3-m0034-5p	-	15	15	-	ATGGATGGATGGATGGATGGG	-
	novel_mir_18	Chr3:3825506:3825618:-	GGATGGGTGGATGGATGGATGGATGGATGGGATGGAGCTGATCAATCGTGCGGTCACCTCCGATGGGGACGTCGCACCCAACCATACATCTCACGCCCAGTCCAGCCCAGCCG	((.(((((((((((.((((((..(((.((((.(((((.(((((........))))).)))(((((....))))))))))).)))..)))).))...))).)))).)))).)).	-47.5	B3-m0035-5p	-	15	15	-	ATGGATGGATGGATGGATGGG	-
	novel_mir_285	Chr3:21775216:21775309:-	TAAAAATATATACACATATACAAAGTTTATATACGATGTATACAAAGCTTATATAGGACATATATGAACTTTGTATATGATGTATATGAACTTT	......(((((((((((((((((((((((((((...((((((.......)))))).....))))))))))))))))))).))))))))......	-30.7	-	B3-m0036-3p	11	-	11	-	ATATGAACTTTGTATATGATGTA
	novel_mir_154	Chr3:29333217:29333470:-	AAGCTGCGACAAACTTTCCTGGTCGCGTCGGGGAGGAGTGGCATCTGGCGGCTGGGGATTGCCACCGGTGACCTTCAGGCCAGATCGAGAAGGACTACTGAGGGTAGCCGGGAGGGGAAGAAGCTCTCGGGAGGGAAGTGGAGCAGTGAGAAGAGGACAGGAGACTGGGATTGGCTCTTCACCGGCAGCCTTACGCTCTCAGAATATAGACGCCGCTCCTCCCCGACGCGACCAGGAAAGTTTGTCGCAGCTTT	((((((((((((((((((((((((((((((((((((((((((.((((..(((........))).(((((.((((((((...((.((......)))).)))))))).)))))(((((.......)))))(((((.((((.(..((.((((..((((..(((....))).......))))))))..))..)))).).)))))......)))).)))))))))))))))))))))))))))))))))))))))))).	-152.1	B3-m0037-5p	-	88	85	-	AAACTTTCCTGGTCGCGTCGG	-
	novel_mir_55	Chr4:5479935:5480032:+	GGATGATCTAACGGGACGTGGGGTGAGGTGGACCTGGGTTGATACATATTTGACGCTCGGAATACTAGGAGCACGCTGCGCTCCTAGTAGTATCTCTA	(((.(((....((((.(((.(((((.(((.(((....))).)).).))))).)))))))...((((((((((.......))))))))))..)))))).	-30.4	B3-m0038-5p	-	42	42	-	ACGGGACGTGGGGTGAGGTGGAC	-
	novel_mir_56	Chr4:13393623:13393776:+	AGTTCAAGCTACATGACTGTGTCAGGCGTTGAGATATTCTGCATTACTGCAGAGGAGTTGATTCCTTCAGTCAGCTTGTCTCCTTGGATGTGTAGAAATCTGCAAGATGGATGCATGCGAAGGCATAATGGCGCATAGCGATGTGGAAGGAGAG	..(((...((((((..((((((..(.(((((.(...(((((((....)))))))(((((((((.....)))))))))....((((.(.((((((...((((...))))...))))))).))))).))))).)))))))..))))))...)))..	-47.2	B3-m0039-5p	-	9	9	-	ACATGACTGTGTCAGGCGTTG	-
	novel_mir_271	Chr4:17386271:17386500:+	TTCCTCTCAATATAGCCATGGTCTCGTAGCCACCGTGTAGAAATATGTTTACTGATGTGTTCAATATACAGTATAAAAGTAAAAAACTGATTCTAAGAGTAGTATGAATGAAAAAATTACAGGCTCAATCACACACAATCGATAAAATTACTCACAGGTGAATCAAACTAGAAAAAAAATGATTCGGCCACAAATCCATCTGGTGGCTTTGTTGGATCTTGATATAAGGA	.((((.....((((..((.(((((((.((((((((.((.((........(((((((((.....)))).)))))..............(((((....((((.(((.............)))..))))))))).........................(((((((((..............)))))).))).....)).)).)))))))).))..))))).)).))))))))	-40.7	-	B3-m0040-3p	10	-	10	-	CTGGTGGCTTTGTTGGATCTT
	novel_mir_135	Chr4:17419253:17419469:+	GCTTTCAAGTATATATTTGATCAGGGATTCAACATGCCTAAGTGTCATTATGCATAATGCATGACATATAGTCAAAGAACAAGAAAAAGAATGGGTAGTACCAAAATGCTAGGTAAGTGTGATGCATCAGAGACAGCCTTGCGTGGCTGCTGTACAGGATTGAATCATTTTGTGGTTTGGACTGGAATTTAATGTTATCAAGAGTGTGCCATCATTT	........((((((.((((((((.((((((....((.(((.((((((...((((...)))))))))).))).)).................(((......)))..((((..............)))).(.((.(((((......))))))).).(((..(((((((((...))))))))).)))))))))..))..)))))).))))))........	-47.4	B3-m0041-5p	-	6	5	-	ATATATTTGATCAGGGATTCA	-
	novel_mir_61	Chr4:17474107:17474276:+	CACCAAGCAATATGTTGTCTTCTTCACCAGTGCATGCAGATCCTTTTCTCTATAGCTACAATTTTAGGATGGGGAGACGTGAGGAATCAAAATATGCGAAGGATGTGCGACTCAGGAACAAGGTTAGTTACACAACCCACTGGTGCTGAAGTAGGGATGTAGGTTCCAGA	.....(((.((((.((..((((..((((((((..((((.((((((((((((((..(((......))).)))))))....(((....)))........))))))).))))............((((........))))))))))))..))))..)).))))..))).....	-45.2	-	B3-m0042-3p	7	-	6	-	CTGGTGCTGAAGTAGGGATGT
	novel_mir_286	Chr4:6533687:6534031:-	ATAGACGTCCGAGGAATGTCGGCACGACGCGAGCCACATGATTCGCTTACCTTTTCTACGGAGGGAGTCAACCGCGGCCATAACTTCCTGGTTGGTACTCACGATTCCATCTCTAAACTTCTCCCACAAAGTTTTCGCATCCCTTACTAACTCCCCTGCAATGTCGGTCTGCATGAAGCGTAGCAACAATGTTAGAAAGTGGAACCCTATGTATAAGGACACACAGATGCAACAAAATATTTAAATGCTAGTAGTACCGTCAAGTGAGCGGGGGGTGCTAGCTGCATATCATATATTTGATCAATTGTTGGTGGACCTCGCTCGTCGGGATCCTCGGGTGCAAGC	.....((((((((((.(.(((..((((.(((((((((.((((((.((..((........)))).))))))....((((((........)))))).............(((((..((((((........)))))).....((((((.(((((.....(((.((((...((.....)).)))).))).....))))).))).)))..(((.......)))......)))))((((((.........((((...(((((((.((.........)).)))))))...))))((((......))))...))))))))))..)))))))))))).))))))))))).....	-94.4	B3-m0043-5p	-	8	7	-	GAGGAATGTCGGCACGACGCGA	-
	novel_mir_64	Chr4:13025823:13026157:-	AGTTACTGTTATTCTCCTACTAGGTTTGTTCCTGGCCTCCTGGGCATGGCAGGAATTGGAAACTATTCAGGCACCTTCGATCACCTTGATCCCAGGTCTGGTTGATCTCAGGCCACGCAAGTTCCTTGGATGCTCACATATAGTGCCTGTCAGCCGCCCATGGCCCGCCGTGGCAACGTGCTGCAGACTTGGTAAAATGCTGTTTCACTCTTCGGTGTGATAAGCACACACTAATACGGATGCCCAGGAGAGACCCTAGCTGGTGGTGGCCTGGCCCGGCGGTGTCTCTACTATGCCTAGCGATTGGATAAATTGGTAGAGTGGATGCAGCTGAT	.((((((((.((((.((((((((.(((((((..((((((((((((((.((..((((.(....).))))..))......(((((...)))))(((((((((........(((((((..((((...))))..))............))))).((((((.((((((....))))))...)).))))))))))))).....((((...((((........))))..)))).............))))))))))).).))(((((((((((.((((((......))).))).)))))).).)))).....)))))))))))))).).)))))))).))))	-112.6	-	B3-m0044-3p	19	-	19	-	TGGATAAATTGGTAGAGTGGA
	novel_mir_65	Chr4:14571152:14571268:-	CATGTAGAAGACTGATTTGTCTTGGATGTTTGATGTCACGCCCAGAAATTCACGAACCAGAATTTCTAAGCTGAATATGCATTAAATCCCTGTCCAGGACCAGCCAGGGTATACAAA	..((((.....(((.((.((((((((((((((((((((.((..((((((((........))))))))..)))).....)))))))))....))))))))).)).)))....))))..	-34	B3-m0045-5p	-	17	17	-	ACTGATTTGTCTTGGATGTTT	-
	novel_mir_65	Chr4:15194360:15194476:-	CATGTAGAAGACTGATTTGTCTTGGATGTTTGATGTCACGCCCAGAAATTCACGAACCAGAATTTCTAAGCTGAATGTGCATTAAATCCCTGTCCAGGACCAGCCAGGGTATACAAA	..((((.....(((.((.(((((((((((((((((.(((((..((((((((........))))))))..)).....)))))))))))....))))))))).)).)))....))))..	-35.5	B3-m0046-5p	-	17	17	-	ACTGATTTGTCTTGGATGTTT	-
	novel_mir_137	Chr4:17488209:17488303:-	GGCCGTGGCCAAGTGTGTAATGTTGAACGGACTGCTTCTCTGGCCCTTGTCACGTCTTCTTGTTCAGCATTGGATTGGGCTTGGCGTCAGGACCA	((((...(((((((((.((((((((((((((..((.....((((....)))).))..)).)))))))))))).))...)))))))....)).)).	-32.8	B3-m0047-5p	-	12	12	-	AAGTGTGTAATGTTGAACGGA	-
	novel_mir_67	Chr4:17501349:17501479:-	AGGCATCAAATAGCCTGACTGTCATTGGGAATGGTGAAGCCACTTGTAATCTTCGAACAATACCAAAAAAAAAGGTGTACATCATGATGTAATAATCTGTATTCCCAACTAGCACGACTGAAGGGATGCCC	.((((((...((((.((.(((...((((((((((((....)))................(((((.........)))))....((.(((......)))))))))))))).))))).).)))....)))))).	-29.6	-	B3-m0048-3p	7	-	7	-	ATTCCCAACTAGCACGACTGA
	novel_mir_287	Chr4:20974164:20974379:-	TTACGGCGTGACAAAGATGATAGATTTGCTGCACGTTAACTCTCTCGTGGTTCTTACTACCCATGCCTCCATAGCTACTTATGGCCTGCCATACACACCCTCTGCAATACCACTGGCGATGTATGAGCCACTCACGTGGGACCAGACCCGCTTGTCAGTGACTTCTAGTTCTAGCCGCAGTGCAAAGGATCTATGCGCATTTTATCACAACTGTTG	..((((.((((..((((((((((((((..(((((............((((((...((((.........((((((....))))))...((((((((...((..((......))..))...)))))).))((((((.(((((......))))).))..)))).....))))...)))))).)))))..))))))))...)))))).))))..))))..	-54.3	B3-m0049-5p	B3-m0049-3p	9	6	2	ACAAAGATGATAGATTTGCTG	AAGGATCTATGCGCATTTTATCA
	novel_mir_272	Chr4:22407619:22407760:-	TTAGAAGTTTAAAGAAATTAGAATGATGTGATGTAAAAATTAGAATATTCAAACTTCCAACTTTTCCGTCACATCGAACTTTACTACACACATCAACTTTCAACTTTTCCGTTACATCGTTCTAATTTTTTCAAACTTCCAT	...(((((((.((((((((((((((((((((((.((((.((.(((.....................................................))))).)))).)))))))))))))))))))))).)))))))...	-32.99	B3-m0050-5p	-	7	7	-	AAAGAAATTAGAATGATGTGATG	-
	novel_mir_72	Chr5:3086479:3086703:+	ACTAGTGAATGGAAGGTATCAGGAATTTGGATCCCTCTTTGTCATTCCTGCATGGAGTAGTTTTAACCTCTTGAATCTTGATGGTGCCTCCATTAGGTTGGTTTAAATAATAACCTAGCCTGTTGTCTCATCCAAGTCTCTAGATTTTATTTTGTATGCTTGCATGGCTCTAATCCATTTTCTGTTGTCAGGATCTGAATATCTTGAGCATCCAGTTGTGCTAGA	.((((((..((((..((.((((((((((((((((((((.(((.......))).))))...........(((.((..((((..((((....((.((((((((((........)))).)))))).))...))))))))..)).)))........((((....))))((((..................)))))))))))))).)))))))).))))....)))))).	-56.4	-	B3-m0051-3p	24	-	24	-	CTGAATATCTTGAGCATCCAG
	novel_mir_279	Chr5:21373452:21373537:+	ACATTGATCCGCTTTGTTGCGTCGATTGGAGGAACGGCTCTTCTTGTACGTGCTTCCTTCATTGATGCATCAACGCACGCTGCTAT	..........((.(((.(((((((((.((((((..(((.............)))))))))))))))))).))).))..........	-25.9	B3-m0052-5p	-	8	8	-	GCTTTGTTGCGTCGATTGGAGGA	-
	novel_mir_75	Chr5:29688157:29688507:+	CTTACTCCTTATCTTTTCAGTTCTTGTTCCAATTCCGATTACGGTGGTGGCCCATGTAATTAAAAGGCCCATATATATATAAGCTGGCAAGGCCGCAAGACTGAAGAGGAGAGGCAATGCCATGCATGCAGATGAAGATCGCTTCTCTTGTATGTAAGTATGTATGTAGAAGGAAAATAAGGGGGAATATATATAGTAAAATAGTAATTCAGGAGTGGTGGGTGTTCCTGAAAGAGCTCATGGCCACAGGGCTTAACATAGAATCATCTTAATTGTGCGGAAGAAACAAAGCATGCACGCGCAGGAGGATGGAGTAGTAGAATGGATGGATGGATGGATGGATGAGGGTAG	.((((.((((((((.((((.(((((..((((.(((.(((((((.(((....))))))))))...((((((.((((((((((...(((((..(((......((....))....)))..)))))(((((((((..((((....))))..)))))))))..))))))))))................((((...(((......)))...))))....(((((.((.((((......)))).).).))))).)))))).........(((((((..(((((((..................))))))).))))))).......)))))))..)).))))))).))))))))))))	-96.7	-	B3-m0053-3p	26	-	26	-	AATGGATGGATGGATGGATGG
	novel_mir_79	Chr5:25105550:25105704:-	TCAGCTGGAGCTTCTGTAGGATCAGGTTGTTCGTTTCAAATTCCCCATGCATCTCATTCTTAGGGCACCACTGGTTTCTCACAAATCAGAGTAAGGGAATGGTCTGAGATTTGCAGTTTCCGAATGCCTGGTTTGTCCAGAGTAGTAGCAGCCTT	...((((..(((((((..(((((((((.(((((..............((((......(((((((.((((.((.....(((........)))..))))..)).)))))))..)))).....))))))))))))))...))))..)))..))))...	-41.7	B3-m0054-5p	-	11	11	-	CTTCTGTAGGATCAGGTTGTT	-
	novel_mir_274	Chr5:25129390:25129534:-	CTGAGAAGCGAGCAGCTAACATGAACTGGACCATACTGATGTCACCAAAGTTCATCTCCAATTCCCCATGACTCCCATTCTTATTAAGGCATACTATCACATTTTGTTGTCGAAACGCCGGTATATGTTGTGTTGCTCTTTCCAC	.((.((((.((((((((((((((.(((((........((((..((....)).))))...........(((.....))).........((((.((...........))))))......))))).))))))).))))))))))))).	-29.5	B3-m0055-5p	-	7	7	-	AGCAGCTAACATGAACTGGAC	-
	novel_mir_80	Chr5:25143438:25143654:-	TGAACTGGACCATACTCAGATCGACGCAGTTCACCTTGAATTCCCCATGAATCCCATTCTTAACTTAAGGGCATGCTATCACTTCTCGTCGTCGAACCACCGCCGGTACGCTGATTTCTCGTAGAAATGACCAGGGTTCGAATTTTGAGTATTGAGCGATCAGCGTGACTTGGAATATTGAGTGATCGAGTGTGACTTGGAACTTAGTGCTATTCAT	((((..(.(((((((((.((((.((.((((...((..(.((((.....))))(((.............)))(((((((((.(((((((...((((((((((...)))...(((((((((...))))))...))))))))))....))))....))).))).)))))).)..))...)))).)))))))))))))............)).)..)))).	-51.2	B3-m0056-5p	-	6	6	-	CATACTCAGATCGACGCAGTT	-
	novel_mir_160	Chr6:7840964:7841300:+	ATCTCACTGACACTGTCCATGAACTGTACAGAATTCAGAGATTATTCAGTTAAATGCATGCAACAATTGTTAGCTTAGTCAGCGATAGCGCTGGCGGCAAAAATCAAGAAAGCCATAGCAGAAGCAAAACGACCTTATCGCTTAGCTTTTGATTTCTTTTTCCTCTTTTACTCTTAGTCTTAGAGATTAGCATATACTCCCTTCGTCTTAAAATATTGAAACCTAATACTAGATTAGACACATCTTAGTAGTCCCTTGTATAAGATGTGTCTGTCCTGTTCGTTTCTTCTGCAGCCAGAGGATAAAATTTTGGATACTCGTGGCATGTTTTTCAAAC	........((((.((.((((((..(((.(((((((..(((((.....(((...((((..(((((....))).))...(((((((....)))))))(((.............)))....(((((((.((.(((.....))).)).)))))))...........((((...(((...)))...))))....))))..)))......)))))..................((..(((.((((((((((((.............)))))))))))))))..)).....(((((((....)))))))...))))))).))).))))))))))))........	-74.2	-	B3-m0057-3p	35	-	34	-	AAATTTTGGATACTCGTGGCATG
	novel_mir_288	Chr6:9659931:9660140:+	GGTGCTACAAGCATGCAGCCACATCGAGAACGCATGACATGTCGGCCACAGTTGTTCCCAGCTGTCGTACTTAGTGCGACACACATGGCCACTGTGAAGAGATGATTTGCCTGTATCTTCACTTATACCAATGCAAATTCAGCCGATGGATTCAGTTTTGCCTACGCCGAAGTCTCACATGCTCTGTGGATTGGCAGTATCTTGGGCAGG	..((((.((((.((((.((((.(((.(.(..(((((.....(((((..((((((....))))))((((((...))))))......(((.....(((((((...............))))))).....)))..(((((....((.((.....)).)))))))....))))).......)))))..).).))))))).))))))))))))..	-61	-	B3-m0058-3p	10	-	9	-	TGCTCTGTGGATTGGCAGTAT
	novel_mir_84	Chr6:17751138:17751350:+	TTCATCGAGTATTGGGCAATGGAACGACGTGCGGTAAATCACACCATTCCGTAGGTGTAAAATGTTATACATATATTTAGGTTTTATATTTCTCTATTTGTAAAGGGTTTCAGATGAATACAAGTGCTATTCGTAACAATAAAGGATGTTTTTCATTCCAATCTAAGACGTTGTATTTCTGTTTGTACAAATTTGTGCCTTGGCACCGATGAT	.((((((((.((((((..((((((.(((((.(..((....(((((........)))))....((((((..((((((((.(..(((((....((((........))))......)))))..)))))).)))..)))))).))..).)))))))))))))))))))......((((((........))))))....((((....)))))))))).	-42.6	B3-m0059-5p	-	6	6	-	ATTGGGCAATGGAACGACGTG	-
	novel_mir_289	Chr6:28099429:28099583:+	GATGTTGTTGACTTTTCGTGTAATGTTTGGGCATTCATTTTATTCAAATATATATAAATATCATTTATTTTCTTAACTTATATTTTTACATTTGTACTAAACTTTTTTTTAAATAAAATGATTGGTTAAATGTTATATGAAAAGTTGATAACTTA	...(((((((((((((((((((((((((((.((.(((((((((((((((...((.((((((...(((......)))...)))))).)).))))).................)))))))))).)).)))))))))))))))))))))))))))...	-40	B3-m0060-5p	-	5	5	-	ACTTTTCGTGTAATGTTTGGGCA	-
	novel_mir_86	Chr6:28312353:28312687:+	TCTGTCTCCTAATCTGCTGGTTTGTGTGGCGAGAGCGCAACTTCAGAATTTTTGAACAGAAAACGCGAACGGCGTTAGAACTCTTCAGAGATATCAAAGATGAAGTTGTAGTGTGGAGAGAGGCCAACATTTTGAGAGAAGTCGGCTAAAGGTCCCGCCTTTGGCGGTTTGCTTCGTTTTTCCTTTTCTTTCTGTTCTTCTCGACTGTTTAATGTCGATTTGTAAAACTTTTCATAACCTCTCCTGATCCTTAATACAATTTGGGCAGCCTGCCTTGGGCCGTCCCGGCTAAAAAAAACCACTGCTAATCAATCGGTGGATTCTTAGGTGACGCG	..((((.(((((((((((((((.(..(((((...((((((((((((((((((((((.((..(((((.....)))))....)).))))))))).)).....))))))))).))((((.((((((..........(((.((((((.(((((((((...))))))))).)...))))).))).....................(((((........)))))...................))))))(((.(((............))))))((......))((((...)))).........)))))))))..))))))))))))...)))).))))..	-94.6	-	B3-m0061-3p	5	-	5	-	CTAATCAATCGGTGGATTCTT
	novel_mir_290	Chr6:29207440:29207597:+	ACAGATCGATCTGCGGCGTTCGTTTGGTTTGGTCTGCGATGTGCTTCTTCGTGTTTGTTTTGCTGTTCTCTTTCGTTTTTTTAGCTGTTTGGTTTGGTTTGGTTTGGTGATCTGAGGATGGACGCCGGCGATGAGGAAGAACATGGTTCGCTCGTCTG	.((((((((.(((((.....)))..)).))))))))(.((((.((((((((((((.((....((((((((..(((((.....(((((.......)))))......)))))...))))))))..)).))).))))))))).)))).)............	-39.1	-	B3-m0062-3p	78	-	77	-	CGGCGATGAGGAAGAACATGGTT
	novel_mir_87	Chr6:4740913:4740987:-	TTGGTGAGTTTGTCTTTCAACTGTGTAATTGCATTGACAATGTTATGAATAGTACTGAAGGGCATAAATTCAGTA	.((.((((((((((((((((((((...((.(((((...))))).))..)))))..)))))))))..)))))).))	-20.2	-	B3-m0063-3p	6	-	6	-	ATGAATAGTACTGAAGGGCAT
	novel_mir_291	Chr6:9664718:9665037:-	GTTGTCTGTGACGGAAGAAGTGGCAGGCCGACAACGGTGCTTGCAGCTTTTCGTCTTGGACATGCCAAGGAGCTAGTGCACGACTTGTCATTCCTGGGAACTCTTTCTGAGTGTCTTCGGTTGTGCCATACAATGCTGCTTACCAATCAAACCAAGTCAAAATGGAAGACTCTGTTTAGTTACAATTATCACTGTACCGGTATTTTTGTTTGTGCATGGGAGTCTGGATGGAGGACATGCATGCATGATCTCATGCACCGGCAAAAATACAGGTACAGTCAAAATTGGCTTGGCTACCTTCTTAGATGTCAGTTTCAGCG	((((....(((((.(((((((((((((((((....((((...(((((....(.((((((.....)))))).).....((((((((.(.(((((..((((....)))).))))).)...))))))))........))))).))))(((.((((..((((.........))))..)))).))).........((((((((.(((((((((((.((((((((((.((((.(((.(.....).))).)).)))))))))))).))))))))))).)))))))).....))))))).)))).))))))...)))))....)))).	-113.6	B3-m0064-5p	-	6	5	-	ACGGAAGAAGTGGCAGGCCGA	-
	novel_mir_90	Chr6:26473452:26473802:-	TCACTATTTAGTTGCCATTTTGTTGCACATTGCCATTCCTCTTCTCCCTCTCTCTGACTGCATGAGTACGTATGTACTCTGCTTAGAGCAAGTTTAATAGTACTAGCTAAATGCTCGTGCGTTACAACAGAATTCTAAAAGAGAACTTCATTTTTCTAAAACCATTCCCCATTGTCGACTCACGAGACTATAGATGCATCAATAAAATTTTATTGGTTAGCTCGCATGACAAAATGATTCCTAATCATGATCCTAACTTAAAGTTGCTATTAAATTTTCTAATGGATTTTTTGCGATTTCGATAGCCTGGTTTTCTTGAATGGCTGTGATGATTTGGCTGCCCCCTCGAGA	..........((.((((..((((((((....(((((((.......((....((((((..(((.((((((....))))))))))))))).(((((((((((((((..(((....((((((.(((((((..((((......((((((......))))))......))))....)))).))).))))))....)))......((((((....))))))(((((....(((((...............)))))...)))))....)).))))))))))))).(((.((((...........)))).)))...)).......)))))))))))))))..)))).))..........	-80.7	-	B3-m0065-3p	66	-	66	-	TGGCTGTGATGATTTGGCTGC
	novel_mir_91	Chr6:28330745:28330822:-	ACTATAGCTCTGCATGGGATTGGGATGTACCGGGACATTTAAGAATGATGGTTCGTTGGATTCCGCAAGTCTATCAGG	.((((((((.(((..((((((..((((.((((...((((....)))).)))).)))).))))))))))).)))).)).	-18.4	-	B3-m0066-3p	5	-	5	-	ATGGTTCGTTGGATTCCGCAA
	novel_mir_280	Chr7:5483960:5484114:+	TGCAAATCAAATTAACATGCAATCTCCAATATTACCTGATCTCAATTGATGGGCTGCACAGGTCCTACATTTGCACATCGTGCTCCATGTGACTAGCCACAGAGGATAGGGTGGAGTCCACCGGTGATGGAGATTGTTTGCTATTTTTCTTTTGC	.(((((..(((.((.((.((((((((((...(((((..(((......)))(((((.....))))).......((((...))))(((.((((......))))..)))...(((((...)))))))))))))))))))).)).))..)))..)))))	-46.2	-	B3-m0067-3p	7	-	7	-	TGATGGAGATTGTTTGCTATT
	novel_mir_93	Chr7:5730180:5730396:+	AAACTCCCGCTGCATCTCATGTTCTATCCTGATCCTCAATCCAACACCACTTTACTAAGCAAAAGTTATATGCGCGAAAATTGTTGTGTTTACGATACACAAAATTGCAAAACAAAGTGCTGCTGAATTCTATAAGAATGGGAAGCATTCAGAAAGCAAGAGTTTTTCCAAGAGAGGCAGTACTGCAGTAGAACAAGAGCATAGCAGCTTGGCTCCA	.....((.((((((((((.(((((((..(((.................(((((........))))).......((((...((((.(((((...)))))))))..)))).......(((((((((...((((.......(((((((.((((.........))))))))))))))).))))))))).)))))))))).))).)).)))))..)).....	-50.6	-	B3-m0068-3p	24	-	24	-	AGTAGAACAAGAGCATAGCAG
	novel_mir_94	Chr7:6434033:6434328:+	TATGTAGCCAATGTAAGAGGTCGGTCATGATTCTTGAAGCCCTGCGGTACTTCCTATTGAAAGAGATGGAGGCGGTATGTATAGCTGATTGATCCGTTTGTTGCCATAGGAGCAAACTTCTCTTTATCCCCCTTGACTCTTCAAACACCTTTGATAAGGTCTTTGCTAGAAGACTAGAGCACTAGACAAAAAAACAATGGGATTCACATGTTCTTGGTAGTTTGGCCAATTTGGTGTCTTCTCGGCATAGCATGGGCGACCTTCGGCATTGAAAATACTTTCTTGGTGCTTGCAGC	..((((((((((((..(((((((.(((((......((((((....))..))))...(((((.(((.(.((((.((.(((...((..(.(((.(((...((....))..))).))).)..))...))).)))))).)))))))))..(((((....)))))((.(((((((((((((((...((((((..((.((((.((.......)))))).))....))))))....))))..))))))).)))).))))))).)))))))..)))))).....(((.....))))).))))..	-73.9	B3-m0069-5p	-	21	21	-	ATGTAAGAGGTCGGTCATGAT	-
	novel_mir_97	Chr7:18555300:18555550:+	CCGTCGTCCTCGTCGTGGCCGCCCCCGCCTCCCCCGCCGCCGGACGCCTCGCAGGACCCCGATCTCGCGCCGCGGGAGGCCACCACCCCGCCGGCCTCCTCGTCCTCGCCGTCGCCGCGCGCGTCGGCCAAGGCGAGGGCGTCCGCCGCGGCGGCGGACGGGCTCGCCTCCGGGGTCGCGGCGCTCAGCTTCGAGGAGCCGCTCGGCGCCGGCGCCGGGGAGGACGGGTACGACTACGGCAAGGGCGACTT	..((((((((.(((((((.((..(((((((((((.((.(((((.((((..((.((..(((((.((.(((((((((((((((...........))))))).((((((((((...(((((....).))))...))))))))))...(((.(((.(((((......))))).))).)))))))))))..))..))).))..))))..))))))))))).))))))).))))..)).))))))).))))))))..	-163.7	-	B3-m0070-3p	8	-	8	-	AGGACGGGTACGACTACGGCA
	novel_mir_98	Chr7:6418469:6418621:-	ACCAACTTGCACGCATTTAGAGATCCTTCATTGGACATGTACGTGAGCATGAGCACGAGCACGAGATTCATCATGTGGCAGAGCACGAGTAAGCTACCCCAATGGATGTAGTCGCAAGCTACCCAATCTAGGACTGGCAGCATGTAAACCTGG	.(((..(((((.((..((((...((((..(((((.(((((......)))))......(((....((((((((...(((...(((........)))...)))...)))).))))....)))..)))))..))))))))..)).)))))...)))	-37	-	B3-m0071-3p	40	-	39	-	CCAATCTAGGACTGGCAGCAT
	novel_mir_292	Chr7:13367038:13367179:-	GCTTTGGTTGAGACGGCTCTGGCTGAGGCTTGGGTTCTGGCTTAGGATCAGGCTGTGGCTCCGGCTTGGGATTAGGATTTGGCTTGGGGTTAGGACTCGGCTCAGGTTTGGGTTCAGGTTTTGGCTCCGGCTTAGGATTTGG	((((((((((((....))).)))))))))..((((((((.(((((..((((((((......))))))))..)))))....((((.((((((((((((.((((((....))))))..))))))))))))))))))))))))..	-48.4	-	B3-m0072-3p	11	-	11	-	GTTCAGGTTTTGGCTCCGGCT
	novel_mir_293	Chr7:14602704:14602928:-	AGGCTGAGAAGTGGAATCCACGTACTCAATCCTTCTCTAGCTCGACGAAGCTGATGGCTTGTTGAGAGCTCGACCAGGCCCACGTCGGGTTAGGAAGGGCGGAAGCTTAATTAACGAGACCGGGCCGTGCACGGCAGCTCGAGGAGGACGGCGGCAGGTCTCCAAGTCTTGTTCGCGCCGCCGTCACCATCGTCTTCGAGAAGGATGGGGATGGAGCTCATCGCC	.(((((((..((((...))))...(((.((((((.(((..(((((.((...(((((((((.(((((.((.((..(((((((..(((..(((((...((((....))))..)))))..))).))))).))..))))..))))).)))((((((((((((.((...)).)))......))))))))).)))))))).)))))..))).)))))).)))))))..)))	-91.4	-	B3-m0073-3p	9	-	9	-	TTCGAGAAGGATGGGGATGGA
	novel_mir_108	Chr8:18672868:18672961:+	TGGATCGGCCACACAGAGTCGCGCAGTGGTACACTTTGGCCGGTCGAATGCCCTCGCCATTTTCTCTTGTGGTTGACTTTTTGTGTTCGATCCT	.(((((((.((((.((((((((((((.((.......((((.(((.....)))...))))....)).)))))..))))))).)))).))))))).	-33.3	B3-m0074-5p	-	32	31	-	ACACAGAGTCGCGCAGTGGTA	-
	novel_mir_109	Chr8:2458805:2458892:-	TCAAACTGATCCAGGGAATTGAGTGTATGGCGGCTAAGCTCATTGTAGCCACTACGGCCCTACATGTCAGCTCCATGGGTAGTAGGAA	((..(((.(((((.(((.(((((((((.((((((((.........)))))......))).))))).)))).))).))))))))..)).	-28.3	B3-m0075-5p	-	7	7	-	CCAGGGAATTGAGTGTATGGC	-
	novel_mir_294	Chr8:17256685:17257012:-	CATTTGCTCGATGAAAATAAGAGCCCTGCTATCATTTTTGCATCCATGCACAAGCTATACGCATGTTGTATATAGTGACAGAGTTATTTGGAGATTGAAGGATATCCAGACAATGTTTTTATGGACGTATAGCATAAAAACCTTCCAAATTTCACATCATGGTGTATATAGTGACATCATACGTCCTGACATCATGAGGTATATAATGATATATAATTCGGTATAGTGACATCATGAGCTATAATTCAGTATAGATGGACATCATGATGTATAGATTTTGCATGGATGCAAAAATGATAGCAGGGCTCCTATTTTCATCCAGCAAATA	.(((((((.((((((((((.((((((((((((((((((((((((((((((.((.(((((((((((.(((.(((....((.((((((((((((.(((....))).))))))....(((((((((.........)))))))))...............(((((((((.((((.((((((.((((.((.((....)).)).))))...))).........))).))))...)))))))))....)))))).))....))).))).)))).))))))).)).)))))))))))))))))))))))))))))).)))))))))).))))))).	-130.1	-	B3-m0076-3p	6	-	6	-	ATAGCAGGGCTCCTATTTTCAT
	novel_mir_116	Chr9:9021971:9022217:+	CCGCCAGAGTTGTAGCATGTAGGGAAGGTTAAATCCATTTGGGTATGATGAAGTGTTATTCGAAAGGCTAGACGATTGGCAGCACATCTTGCTGCTAATTTGCCATTTTTTAGATAAAAAAGCCAAGCCTTCTAAAAGGAATGTTTGATGTACCTAGAGAAGTCACTACCAAACAGAAGAATTTGACTGTAATAACAGCTGCAGATTGATCCTTAAAATTCTGTAAAAGTGCTCAACGAAGTGGTGA	.(((((..((((.(((((.((.((((..(((((((.((((((((((((((((......)))....(((.....(((((((((((.....))))))))))).))).((((((((.((...((((....((((....))))...))))....)).)))))))))))).))))...((((....)))).((((....))))...))))).)))..))))..)))).))...)))))))))....))))).	-62.1	B3-m0077-5p	-	14	14	-	TGTAGCATGTAGGGAAGGTTA	-
	novel_mir_119	Chr9:9324265:9324429:+	TTGGCTATTACAGAGAAATCCAAATCGCGTGCTTTTCTAGTGAAAGACAGGTATTATTCACATCATATTCTTTTTCGTGTGTTCATACTCGTCAGTGTTTAACATGTTTTTCCTTTTTTTTTACCGTGCTGATATGAGGTTTGCATTTTATTCTGTAATTTCTCT	..((..(((((((((((((.((((((.((((........((((((((.(((........................(((((....(((((....)))))...))))).....)))..))))))))........)))).)))))).)))))..))))))))..))..	-29.2	B3-m0078-5p	-	5	5	-	CAGAGAAATCCAAATCGCGTG	-
	novel_mir_295	Chr9:22792280:22792579:+	GCGAGGTCGGCGGGGAGGACGAGGCGGACGGCGGACTGAACCTCACGGGAGGTGAGGGTGAGGCGGCCGGAGAGCTTGGAGAGGCGAGAGGCCTCGTCGGCGAGGCGCTCGAACATGTCGGCCATCATCATGTCGAGGACGTCCATGGTTTGGGCGGAGGCGCCCAAGTCAGGGTGCACCTGCTTCAGCACGCGCCACACGTACCTCTTGTACCCGCCATACTCCAATGCACCGCCTCTCCTCCTCCTACTCCTTTTTCTTCCATGCCCCGCGCGCTTCTTCTTCTTCGCTGCCGCCGCC	(((.((.((((((((((((.((((((..(((.((..((........(((((..(((((.((((.(((.((...((((((((.((((.(((((((((....)))))).)))..(((((..(.....)..))))).((((((((...((((((((((((..((((((......))))))..)))).)))).....)))).)))).)))).......))))...)))))).)).))))))))).)))))...)))))........))..)))))..)))))).))))))))))))))..))).	-138.1	B3-m0079-5p	-	7	7	-	CGGGGAGGACGAGGCGGACGG	-
	novel_mir_286	Chr9:13529844:13530186:-	ATACACGTTCGAGGAATGTCGGCACGACGCGAGCCGCATGATTCGTTTACCTTTTCTACGGAGGGAGTCGACCGTGGCCATAACTTCCTGGTTGGTACCCGCGATACCATCTCTAAGCTTCTCCCACAAAGTTTTCGCATCCCTTACTAACTCCCCTGCAATGTCGGTCTGCATGGAACGGAGCAACAGTGTTAGAAATTGGAACCCCATGTATAAGGAGACACCGATGCAATAAAATATTTAAATGCGAGTAGTACCGTCAAGTGAGCGGGGGGTGCTAGCTACAGATCATATATTTGCTCAATAGTGGGTGGACCTCGCTCGTCGGGATCCTCGGGTGCAA	...(((..(((((((.(.(((..((((.(((((((((.((((((.((..((........)))).))))))...)))))..........((((((((((((((((..........((((((........)))))))))).(((((((((.....((.((((.........)))).)).((((.((.((.(((((.(((..(((....)))(((((..((.....)).)))))........))).)))))..)).)).))))..)))))).)))))))))))))))...........((((((((....))))))))..))))))))))).)))))))))))...	-90	B3-m0080-5p	-	8	7	-	GAGGAATGTCGGCACGACGCGA	-
	novel_mir_75	Chr9:18868646:18868929:-	CGCGGTCGCTGCTCGCCGTCTCCGACTACTTCCACCGCCTCCGCACCCTCAGCTCCCTCTGGGTCACCCGCCCCAGGCACCCGCCTCACGACCACCAGCCGCCGCCGCACTCCGCCGCCCCCCACACCTGAGATCACCGCCGCCGGCAACGCATGCAAACACCGTAGCTCTTAGCTAGCAGCTTAGAGATATCGAGAGATCAGAAATTAAGCGATCGATCGAGAGAGGACGACGACTGTGAAACCCCCCATGGAATGGATGGATGGATGGATGGATGAACCGAT	..((((.....((..(((((((((.(((.(((((.........(((..((..(((((((.((((.....)))).((((....))))...........((((.((.((..(((.................))).....)).)).))))......(((.......))).((((.((((...)))).))))...((((..((((...........))))..))))))).))).)..))..)))..........)))))))).))))..)))))..))....))))..	-68.1	-	B3-m0081-3p	25	-	25	-	AATGGATGGATGGATGGATGG
