# Supplementary material for: Genetic Subtraction Profiling Identifies Candidate miRNAs Involved in Rice Female Gametophyte Abortion
Source: G3 (Bethesda). 2017 May 19;7(7):2281–93. doi: 10.1534/g3.117.040808 (PMC5499135; doi:10.1534/g3.117.040808)
Supplement: Supplementary file 6 [file 2281TableS4.xlsx]

## Sheet: Sheet1
	Table S4 All significantly differentially expressed known miRNAs generated from all comparisons in this study.
	If the |fold change log2| > 1 and P-value < 0.01, miRNAs were labeled by “**”. If |fold change log2| > 1 and 0.01 < P-value < 0.05, miRNAs were labeled by “*”. “Std” represent the normalized expression of miRNA.
	A1-vs-A2	miR_name	A1-total-reads	A2-total-reads	A1-expressed	A2-expressed	A1-std	A2-std	fold-change(log2 A2/A1)	P-value	sig-lable
		osa-miR1319b	8087754	6859995	16	5	1.9783	0.7289	-1.44047	0.0446009	*
		osa-miR1425-5p	8087754	6859995	337	32	41.6679	4.6647	-3.15908	3.38867e-55	**
		osa-miR1427	8087754	6859995	22	8	2.7202	1.1662	-1.2219	0.0356404	*
		osa-miR1432-5p	8087754	6859995	93	2	11.4989	0.2915	-5.30186	1.65947e-22	**
		osa-miR1436	8087754	6859995	11	2	1.3601	0.2915	-2.22214	0.0288777	*
		osa-miR1440b	8087754	6859995	10	2	1.2364	0.2915	-2.08458	0.0464222	*
		osa-miR156a	8087754	6859995	91214	36162	11278	5271.43	-1.09725	0	**
		osa-miR156b-5p	8087754	6859995	91250	36176	11282.5	5273.47	-1.09726	0	**
		osa-miR156c-5p	8087754	6859995	91244	36176	11281.7	5273.47	-1.09717	0	**
		osa-miR156d	8087754	6859995	115080	44846	14228.9	6537.32	-1.12205	0	**
		osa-miR156e	8087754	6859995	91214	36162	11278	5271.43	-1.09725	0	**
		osa-miR156f-5p	8087754	6859995	115012	44823	14220.5	6533.97	-1.12194	0	**
		osa-miR156g-5p	8087754	6859995	91243	36177	11281.6	5273.62	-1.09711	0	**
		osa-miR156h-5p	8087754	6859995	115012	44823	14220.5	6533.97	-1.12194	0	**
		osa-miR156i	8087754	6859995	91214	36162	11278	5271.43	-1.09725	0	**
		osa-miR156j-5p	8087754	6859995	115012	44822	14220.5	6533.82	-1.12197	0	**
		osa-miR156l-5p	8087754	6859995	28	0	3.462	0.01	-8.43546	3.67572e-08	**
		osa-miR159a.1	8087754	6859995	825	202	102.006	29.4461	-1.79251	3.20214e-69	**
		osa-miR159a.2	8087754	6859995	461	3	56.9998	0.4373	-7.02619	1.87708e-117	**
		osa-miR159b	8087754	6859995	825	202	102.006	29.4461	-1.79251	3.20214e-69	**
		osa-miR159f	8087754	6859995	12	1	1.4837	0.1458	-3.34714	0.00474568	**
		osa-miR160a-3p	8087754	6859995	15	4	1.8547	0.5831	-1.66937	0.0310567	*
		osa-miR160a-5p	8087754	6859995	156	3	19.2884	0.4373	-5.46297	1.74839e-37	**
		osa-miR160b-3p	8087754	6859995	15	4	1.8547	0.5831	-1.66937	0.0310567	*
		osa-miR160b-5p	8087754	6859995	156	3	19.2884	0.4373	-5.46297	1.74839e-37	**
		osa-miR160c-5p	8087754	6859995	156	3	19.2884	0.4373	-5.46297	1.74839e-37	**
		osa-miR160d-3p	8087754	6859995	11	1	1.3601	0.1458	-3.22165	0.0081931	**
		osa-miR160d-5p	8087754	6859995	159	3	19.6594	0.4373	-5.49045	2.92798e-38	**
		osa-miR160e-5p	8087754	6859995	224	14	27.6962	2.0408	-3.76248	5.86904e-43	**
		osa-miR164a	8087754	6859995	92	29	11.3752	4.2274	-1.42805	7.23569e-07	**
		osa-miR164b	8087754	6859995	92	29	11.3752	4.2274	-1.42805	7.23569e-07	**
		osa-miR164f	8087754	6859995	92	29	11.3752	4.2274	-1.42805	7.23569e-07	**
		osa-miR166b-5p	8087754	6859995	37	15	4.5748	2.1866	-1.06502	0.0134336	*
		osa-miR166e-3p	8087754	6859995	9	80	1.1128	11.6618	3.38952	2.47027e-18	**
		osa-miR167a-3p	8087754	6859995	417	157	51.5594	22.8863	-1.17175	8.29406e-20	**
		osa-miR168a-5p	8087754	6859995	28729	11915	3552.16	1736.88	-1.0322	0	**
		osa-miR172a	8087754	6859995	37	10	4.5748	1.4577	-1.65001	0.000556506	**
		osa-miR172d-3p	8087754	6859995	37	10	4.5748	1.4577	-1.65001	0.000556506	**
		osa-miR1846a-3p	8087754	6859995	19	3	2.3492	0.4373	-2.42547	0.00187989	**
		osa-miR1846a-5p	8087754	6859995	29	6	3.5857	0.8746	-2.03556	0.000462148	**
		osa-miR1846b-5p	8087754	6859995	29	6	3.5857	0.8746	-2.03556	0.000462148	**
		osa-miR1846e	8087754	6859995	72	18	8.9023	2.6239	-1.76247	3.60238e-07	**
		osa-miR1847.1	8087754	6859995	9	1	1.1128	0.1458	-2.93213	0.0240386	*
		osa-miR1849	8087754	6859995	10	1	1.2364	0.1458	-3.08408	0.0140745	*
		osa-miR1860-5p	8087754	6859995	24	6	2.9674	0.8746	-1.7625	0.00396164	**
		osa-miR2055	8087754	6859995	125	42	15.4555	6.1225	-1.33593	3.74333e-08	**
		osa-miR2118b	8087754	6859995	4	16	0.4946	2.3324	2.23748	0.00221686	**
		osa-miR2118n	8087754	6859995	4	16	0.4946	2.3324	2.23748	0.00221686	**
		osa-miR2867-3p	8087754	6859995	60	15	7.4186	2.1866	-1.76246	3.54628e-06	**
		osa-miR2873b	8087754	6859995	26	6	3.2147	0.8746	-1.87799	0.001706	**
		osa-miR319a-3p	8087754	6859995	48	13	5.9349	1.895	-1.64703	8.02567e-05	**
		osa-miR319b	8087754	6859995	86	7	10.6334	1.0204	-3.3814	6.00357e-16	**
		osa-miR394	8087754	6859995	159	0	19.6594	0.01	-10.941	4.18188e-43	**
		osa-miR396a-5p	8087754	6859995	21	4	2.5965	0.5831	-2.15475	0.00222338	**
		osa-miR396b-5p	8087754	6859995	21	4	2.5965	0.5831	-2.15475	0.00222338	**
		osa-miR396c-3p	8087754	6859995	18	4	2.2256	0.5831	-1.93238	0.0085942	**
		osa-miR396c-5p	8087754	6859995	24	2	2.9674	0.2915	-3.34763	3.47066e-05	**
		osa-miR396e-5p	8087754	6859995	118	37	14.59	5.3936	-1.43566	1.67005e-08	**
		osa-miR396f-5p	8087754	6859995	118	37	14.59	5.3936	-1.43566	1.67005e-08	**
		osa-miR444b.1	8087754	6859995	83	27	10.2624	3.9359	-1.3826	4.43875e-06	**
		osa-miR444c.1	8087754	6859995	83	27	10.2624	3.9359	-1.3826	4.43875e-06	**
		osa-miR444d.3	8087754	6859995	18	6	2.2256	0.8746	-1.3475	0.0417987	*
		osa-miR444f	8087754	6859995	10	2	1.2364	0.2915	-2.08458	0.0464222	*
		osa-miR5083	8087754	6859995	25	3	3.0911	0.4373	-2.82143	9.36366e-05	**
		osa-miR5161	8087754	6859995	21	3	2.5965	0.4373	-2.56987	0.000704022	**
		osa-miR531a	8087754	6859995	112	18	13.8481	2.6239	-2.3999	8.53368e-15	**
		osa-miR531b	8087754	6859995	112	18	13.8481	2.6239	-2.3999	8.53368e-15	**
		osa-miR531c	8087754	6859995	112	18	13.8481	2.6239	-2.3999	8.53368e-15	**
		osa-miR5486	8087754	6859995	192	68	23.7396	9.9125	-1.25997	6.52675e-11	**
		osa-miR5487	8087754	6859995	469	157	57.9889	22.8863	-1.34129	7.06433e-27	**
		osa-miR5490	8087754	6859995	18	5	2.2256	0.7289	-1.6104	0.0203035	*
		osa-miR5491	8087754	6859995	22	6	2.7202	0.8746	-1.63702	0.00896357	**
		osa-miR5497	8087754	6859995	1095	310	135.39	45.1895	-1.58306	6.09327e-77	**
		osa-miR5499	8087754	6859995	30	11	3.7093	1.6035	-1.20992	0.0141133	*
		osa-miR5505	8087754	6859995	12	0	1.4837	0.01	-7.21306	0.000681252	**
		osa-miR5508	8087754	6859995	16	2	1.9783	0.2915	-2.76269	0.00239541	**
		osa-miR5516a	8087754	6859995	11	1	1.3601	0.1458	-3.22165	0.0081931	**
		osa-miR5516b	8087754	6859995	11	1	1.3601	0.1458	-3.22165	0.0081931	**
		osa-miR5519	8087754	6859995	36	9	4.4512	1.312	-1.76243	0.000366275	**
		osa-miR5791	8087754	6859995	34	2	4.2039	0.2915	-3.85016	1.38111e-07	**
		osa-miR5792	8087754	6859995	62	9	7.6659	1.312	-2.54669	2.87315e-09	**
		osa-miR5793	8087754	6859995	196	65	24.2342	9.4752	-1.35482	2.99245e-12	**
		osa-miR5800	8087754	6859995	41	3	5.0694	0.4373	-3.53512	1.86632e-08	**
		osa-miR5806	8087754	6859995	429	127	53.0432	18.5131	-1.51862	1.98291e-29	**
		osa-miR5813	8087754	6859995	57	20	7.0477	2.9155	-1.27341	0.000373272	**
		osa-miR5818	8087754	6859995	11	0	1.3601	0.01	-7.08757	0.00125909	**
		osa-miR5821	8087754	6859995	17	4	2.1019	0.5831	-1.84988	0.0132988	*
		osa-miR6250	8087754	6859995	15	4	1.8547	0.5831	-1.66937	0.0310567	*
		osa-miR6253	8087754	6859995	17	2	2.1019	0.2915	-2.85013	0.00143035	**
	A2-vs-A3	miR_name	A2-total-reads	A3-total-reads	A2-expressed	A3-expressed	A2-std	A3-std	fold-change(log2 A3/A2)	P-value	sig-lable
		osa-miR1423-5p	6859995	6946260	24	67	3.4985	9.6455	1.46312	6.52578e-06	**
		osa-miR1425-5p	6859995	6946260	32	122	4.6647	17.5634	1.91272	1.55652e-13	**
		osa-miR159a.1	6859995	6946260	202	567	29.4461	81.6267	1.47096	4.44924e-40	**
		osa-miR159b	6859995	6946260	202	567	29.4461	81.6267	1.47096	4.44924e-40	**
		osa-miR160a-5p	6859995	6946260	3	12	0.4373	1.7275	1.98199	0.0226985	*
		osa-miR160b-5p	6859995	6946260	3	12	0.4373	1.7275	1.98199	0.0226985	*
		osa-miR160c-5p	6859995	6946260	3	12	0.4373	1.7275	1.98199	0.0226985	*
		osa-miR160d-5p	6859995	6946260	3	12	0.4373	1.7275	1.98199	0.0226985	*
		osa-miR160e-5p	6859995	6946260	14	50	2.0408	7.1981	1.81848	5.65624e-06	**
		osa-miR164c	6859995	6946260	14	2	2.0408	0.2879	-2.8255	0.00216249	**
		osa-miR166h-5p	6859995	6946260	15	4	2.1866	0.5758	-1.92505	0.0109252	*
		osa-miR169b	6859995	6946260	21	60	3.0612	8.6377	1.49655	1.45663e-05	**
		osa-miR169c	6859995	6946260	20	61	2.9155	8.7817	1.59076	4.84782e-06	**
		osa-miR171i-3p	6859995	6946260	61	26	8.8921	3.743	-1.24833	0.000124303	**
		osa-miR172a	6859995	6946260	10	2	1.4577	0.2879	-2.34005	0.0211844	*
		osa-miR172d-3p	6859995	6946260	10	2	1.4577	0.2879	-2.34005	0.0211844	*
		osa-miR1862d	6859995	6946260	44	102	6.414	14.6842	1.19497	1.82502e-06	**
		osa-miR1863b.2	6859995	6946260	2	16	0.2915	2.3034	2.9822	0.000801008	**
		osa-miR1868	6859995	6946260	23	57	3.3528	8.2059	1.2913	0.000158456	**
		osa-miR1870-5p	6859995	6946260	126	290	18.3674	41.7491	1.1846	1.11694e-15	**
		osa-miR1871	6859995	6946260	3	11	0.4373	1.5836	1.85651	0.0372912	*
		osa-miR2118b	6859995	6946260	16	2	2.3324	0.2879	-3.01818	0.00066227	**
		osa-miR2118n	6859995	6946260	16	2	2.3324	0.2879	-3.01818	0.00066227	**
		osa-miR2863c	6859995	6946260	10	29	1.4577	4.1749	1.51805	0.00252823	**
		osa-miR2867-3p	6859995	6946260	15	32	2.1866	4.6068	1.07508	0.0149726	*
		osa-miR2873b	6859995	6946260	6	20	0.8746	2.8792	1.71897	0.00652934	**
		osa-miR3980a-3p	6859995	6946260	2	14	0.2915	2.0155	2.78957	0.0025518	**
		osa-miR3980b-3p	6859995	6946260	2	14	0.2915	2.0155	2.78957	0.0025518	**
		osa-miR444f	6859995	6946260	2	10	0.2915	1.4396	2.3041	0.0238029	*
		osa-miR5144-3p	6859995	6946260	22	8	3.207	1.1517	-1.47746	0.00966307	**
		osa-miR5146	6859995	6946260	21	6	3.0612	0.8638	-1.82533	0.00335091	**
		osa-miR5150-3p	6859995	6946260	6	16	0.8746	2.3034	1.39707	0.0373273	*
		osa-miR5150-5p	6859995	6946260	36	106	5.2478	15.26	1.53997	3.52283e-09	**
		osa-miR531a	6859995	6946260	18	42	2.6239	6.0464	1.20436	0.00219789	**
		osa-miR531b	6859995	6946260	18	42	2.6239	6.0464	1.20436	0.00219789	**
		osa-miR531c	6859995	6946260	18	42	2.6239	6.0464	1.20436	0.00219789	**
		osa-miR5485	6859995	6946260	0	24	0.01	3.4551	8.43258	6.9648e-08	**
		osa-miR5487	6859995	6946260	157	36	22.8863	5.1826	-2.14274	9.1695e-20	**
		osa-miR5497	6859995	6946260	310	116	45.1895	16.6996	-1.43617	3.38651e-22	**
		osa-miR5499	6859995	6946260	11	2	1.6035	0.2879	-2.47758	0.0121296	*
		osa-miR5506	6859995	6946260	7	0	1.0204	0.01	-6.67299	0.00743042	**
		osa-miR5793	6859995	6946260	65	20	9.4752	2.8792	-1.71849	4.97073e-07	**
		osa-miR5806	6859995	6946260	127	64	18.5131	9.2136	-1.00671	2.96891e-06	**
		osa-miR7694-3p	6859995	6946260	5	17	0.7289	2.4474	1.74746	0.0115589	*
		osa-miR812k	6859995	6946260	101	295	14.723	42.4689	1.52834	8.76651e-23	**
		osa-miR812l	6859995	6946260	101	295	14.723	42.4689	1.52834	8.76651e-23	**
		osa-miR812m	6859995	6946260	101	292	14.723	42.037	1.51359	2.86063e-22	**
		osa-miR812p	6859995	6946260	20	9	2.9155	1.2957	-1.17001	0.0393953	*
	A1-vs-A3	miR_name	A1-total-reads	A3-total-reads	A1-expressed	A3-expressed	A1-std	A3-std	fold-change(log2 A3/A1)	P-value	sig-lable
		osa-miR1319b	8087754	6946260	16	5	1.9783	0.7198	-1.45859	0.0416347	*
		osa-miR1425-5p	8087754	6946260	337	122	41.6679	17.5634	-1.24636	6.3477e-18	**
		osa-miR1432-5p	8087754	6946260	93	7	11.4989	1.0077	-3.51236	8.2881e-18	**
		osa-miR1440b	8087754	6946260	10	2	1.2364	0.2879	-2.10251	0.0440616	*
		osa-miR156l-5p	8087754	6946260	28	3	3.462	0.4319	-3.00284	1.71286e-05	**
		osa-miR159a.2	8087754	6946260	461	5	56.9998	0.7198	-6.30722	3.13215e-115	**
		osa-miR159f	8087754	6946260	12	0	1.4837	0.01	-7.21306	0.000632148	**
		osa-miR160a-3p	8087754	6946260	15	4	1.8547	0.5758	-1.68755	0.0289893	*
		osa-miR160a-5p	8087754	6946260	156	12	19.2884	1.7275	-3.48098	8.43196e-29	**
		osa-miR160b-3p	8087754	6946260	15	4	1.8547	0.5758	-1.68755	0.0289893	*
		osa-miR160b-5p	8087754	6946260	156	12	19.2884	1.7275	-3.48098	8.43196e-29	**
		osa-miR160c-5p	8087754	6946260	156	12	19.2884	1.7275	-3.48098	8.43196e-29	**
		osa-miR160d-3p	8087754	6946260	11	2	1.3601	0.2879	-2.24007	0.0272567	*
		osa-miR160d-5p	8087754	6946260	159	12	19.6594	1.7275	-3.50846	1.63011e-29	**
		osa-miR160e-5p	8087754	6946260	224	50	27.6962	7.1981	-1.944	3.18821e-22	**
		osa-miR162a	8087754	6946260	25	54	3.0911	7.774	1.33054	7.74509e-05	**
		osa-miR164a	8087754	6946260	92	20	11.3752	2.8792	-1.98215	3.75581e-10	**
		osa-miR164b	8087754	6946260	92	20	11.3752	2.8792	-1.98215	3.75581e-10	**
		osa-miR164c	8087754	6946260	30	2	3.7093	0.2879	-3.68751	1.0912e-06	**
		osa-miR164f	8087754	6946260	92	20	11.3752	2.8792	-1.98215	3.75581e-10	**
		osa-miR166e-3p	8087754	6946260	9	142	1.1128	20.4427	4.19932	8.3615e-37	**
		osa-miR166g-3p	8087754	6946260	29717	12338	3674.32	1776.21	-1.04868	0	**
		osa-miR166h-3p	8087754	6946260	29647	12279	3665.67	1767.71	-1.05219	0	**
		osa-miR166h-5p	8087754	6946260	35	4	4.3275	0.5758	-2.90989	1.92283e-06	**
		osa-miR167a-3p	8087754	6946260	417	136	51.5594	19.5789	-1.39694	1.10359e-25	**
		osa-miR167e-5p	8087754	6946260	1874	772	231.708	111.139	-1.05995	1.04493e-71	**
		osa-miR167i-5p	8087754	6946260	1874	772	231.708	111.139	-1.05995	1.04493e-71	**
		osa-miR168a-3p	8087754	6946260	20	4	2.4729	0.5758	-2.10256	0.00318818	**
		osa-miR168a-5p	8087754	6946260	28729	11455	3552.16	1649.09	-1.10703	0	**
		osa-miR171c-5p	8087754	6946260	120	37	14.8372	5.3266	-1.47793	5.26168e-09	**
		osa-miR171i-3p	8087754	6946260	123	26	15.2082	3.743	-2.02258	1.94028e-13	**
		osa-miR172a	8087754	6946260	37	2	4.5748	0.2879	-3.99007	2.07486e-08	**
		osa-miR172d-3p	8087754	6946260	37	2	4.5748	0.2879	-3.99007	2.07486e-08	**
		osa-miR1846e	8087754	6946260	72	12	8.9023	1.7275	-2.36549	6.76107e-10	**
		osa-miR1849	8087754	6946260	10	1	1.2364	0.144	-3.102	0.0132858	*
		osa-miR1860-5p	8087754	6946260	24	5	2.9674	0.7198	-2.04353	0.00141287	**
		osa-miR1862e	8087754	6946260	60	149	7.4186	21.4504	1.53179	2.36508e-13	**
		osa-miR1863b.2	8087754	6946260	3	16	0.3709	2.3034	2.63466	0.000818249	**
		osa-miR1863c	8087754	6946260	4	13	0.4946	1.8715	1.91986	0.0131513	*
		osa-miR1868	8087754	6946260	22	57	2.7202	8.2059	1.59295	3.34095e-06	**
		osa-miR1870-5p	8087754	6946260	154	290	19.0411	41.7491	1.13263	5.82284e-16	**
		osa-miR1871	8087754	6946260	1	11	0.1236	1.5836	3.67946	0.00141131	**
		osa-miR1881	8087754	6946260	9	0	1.1128	0.01	-6.79805	0.00406032	**
		osa-miR2055	8087754	6946260	125	45	15.4555	6.4783	-1.25443	1.41999e-07	**
		osa-miR2101-5p	8087754	6946260	17	30	2.1019	4.3189	1.03897	0.0158675	*
		osa-miR2863c	8087754	6946260	4	29	0.4946	4.1749	3.07741	7.5844e-07	**
		osa-miR319a-3p	8087754	6946260	48	5	5.9349	0.7198	-3.04356	9.62887e-09	**
		osa-miR319b	8087754	6946260	86	9	10.6334	1.2957	-3.0368	1.0606e-14	**
		osa-miR394	8087754	6946260	159	6	19.6594	0.8638	-4.50838	4.49066e-35	**
		osa-miR396c-3p	8087754	6946260	18	2	2.2256	0.2879	-2.95055	0.000771338	**
		osa-miR396c-5p	8087754	6946260	24	6	2.9674	0.8638	-1.78043	0.00355839	**
		osa-miR396e-5p	8087754	6946260	118	27	14.59	3.887	-1.90825	4.20063e-12	**
		osa-miR396f-5p	8087754	6946260	118	27	14.59	3.887	-1.90825	4.20063e-12	**
		osa-miR3980a-3p	8087754	6946260	3	14	0.3709	2.0155	2.44204	0.00279445	**
		osa-miR3980a-5p	8087754	6946260	220	92	27.2016	13.2445	-1.0383	1.77288e-09	**
		osa-miR3980b-3p	8087754	6946260	3	14	0.3709	2.0155	2.44204	0.00279445	**
		osa-miR3980b-5p	8087754	6946260	220	92	27.2016	13.2445	-1.0383	1.77288e-09	**
		osa-miR444b.1	8087754	6946260	83	34	10.2624	4.8947	-1.06808	0.000167477	**
		osa-miR444c.1	8087754	6946260	83	34	10.2624	4.8947	-1.06808	0.000167477	**
		osa-miR5083	8087754	6946260	25	4	3.0911	0.5758	-2.42448	0.000298403	**
		osa-miR5144-3p	8087754	6946260	40	8	4.9457	1.1517	-2.10241	2.17653e-05	**
		osa-miR5146	8087754	6946260	27	6	3.3384	0.8638	-1.95039	0.000980156	**
		osa-miR5150-5p	8087754	6946260	58	106	7.1713	15.26	1.08945	2.19039e-06	**
		osa-miR5161	8087754	6946260	21	5	2.5965	0.7198	-1.8509	0.00531123	**
		osa-miR531a	8087754	6946260	112	42	13.8481	6.0464	-1.19554	1.63189e-06	**
		osa-miR531b	8087754	6946260	112	42	13.8481	6.0464	-1.19554	1.63189e-06	**
		osa-miR531c	8087754	6946260	112	42	13.8481	6.0464	-1.19554	1.63189e-06	**
		osa-miR5485	8087754	6946260	0	24	0.01	3.4551	8.43258	8.27813e-09	**
		osa-miR5486	8087754	6946260	192	41	23.7396	5.9025	-2.0079	5.06602e-20	**
		osa-miR5487	8087754	6946260	469	36	57.9889	5.1826	-3.48403	8.88545e-84	**
		osa-miR5490	8087754	6946260	18	2	2.2256	0.2879	-2.95055	0.000771338	**
		osa-miR5491	8087754	6946260	22	7	2.7202	1.0077	-1.43265	0.0171451	*
		osa-miR5497	8087754	6946260	1095	116	135.39	16.6996	-3.01923	1.12615e-169	**
		osa-miR5499	8087754	6946260	30	2	3.7093	0.2879	-3.68751	1.0912e-06	**
		osa-miR5501	8087754	6946260	18	6	2.2256	0.8638	-1.36543	0.0388103	*
		osa-miR5503	8087754	6946260	17	4	2.1019	0.5758	-1.86805	0.0122766	*
		osa-miR5505	8087754	6946260	12	1	1.4837	0.144	-3.36506	0.00442913	**
		osa-miR5506	8087754	6946260	9	0	1.1128	0.01	-6.79805	0.00406032	**
		osa-miR5512a	8087754	6946260	16	3	1.9783	0.4319	-2.19549	0.00725851	**
		osa-miR5512b	8087754	6946260	16	3	1.9783	0.4319	-2.19549	0.00725851	**
		osa-miR5516a	8087754	6946260	11	0	1.3601	0.01	-7.08757	0.00117508	**
		osa-miR5516b	8087754	6946260	11	0	1.3601	0.01	-7.08757	0.00117508	**
		osa-miR5519	8087754	6946260	36	5	4.4512	0.7198	-2.62853	4.58562e-06	**
		osa-miR5536	8087754	6946260	184	72	22.7504	10.3653	-1.13413	3.49249e-09	**
		osa-miR5791	8087754	6946260	34	0	4.2039	0.01	-8.71558	7.54023e-10	**
		osa-miR5792	8087754	6946260	62	3	7.6659	0.4319	-4.14969	1.03963e-13	**
		osa-miR5793	8087754	6946260	196	20	24.2342	2.8792	-3.0733	3.61156e-32	**
		osa-miR5794	8087754	6946260	2556	4847	316.033	697.786	1.14271	7.98404e-244	**
		osa-miR5800	8087754	6946260	41	8	5.0694	1.1517	-2.13805	1.38559e-05	**
		osa-miR5802	8087754	6946260	101	40	12.488	5.7585	-1.11678	1.63379e-05	**
		osa-miR5806	8087754	6946260	429	64	53.0432	9.2136	-2.52533	3.87004e-56	**
		osa-miR5817	8087754	6946260	14	4	1.731	0.5758	-1.58797	0.0439203	*
		osa-miR5818	8087754	6946260	11	1	1.3601	0.144	-3.23957	0.00769021	**
		osa-miR5834	8087754	6946260	12	2	1.4837	0.2879	-2.36556	0.0167095	*
		osa-miR6253	8087754	6946260	17	3	2.1019	0.4319	-2.28292	0.00450783	**
		osa-miR7694-3p	8087754	6946260	0	17	0.01	2.4474	7.93511	1.84162e-06	**
		osa-miR812k	8087754	6946260	91	295	11.2516	42.4689	1.91628	1.05613e-33	**
		osa-miR812l	8087754	6946260	86	295	10.6334	42.4689	1.9978	1.51698e-35	**
		osa-miR812m	8087754	6946260	89	292	11.0043	42.037	1.93359	9.15785e-34	**
		osa-miR812o-3p	8087754	6946260	26	10	3.2147	1.4396	-1.15902	0.0270289	*
		osa-miR812p	8087754	6946260	25	9	3.0911	1.2957	-1.25439	0.0211702	*
		osa-miR812v	8087754	6946260	55	22	6.8004	3.1672	-1.10241	0.00174461	**
	B1-vs-B2	miR_name	B1-total-reads	B2-total-reads	B1-expressed	B2-expressed	B1-std	B2-std	fold-change(log2 B2/B1)	P-value	sig-lable
		osa-miR1432-5p	8402490	7843150	16	4	1.9042	0.51	-1.90062	0.0113163	*
		osa-miR156l-5p	8402490	7843150	12	1	1.4281	0.1275	-3.48553	0.00275842	**
		osa-miR159a.1	8402490	7843150	787	337	93.6627	42.9674	-1.12423	1.12263e-35	**
		osa-miR159a.2	8402490	7843150	283	72	33.6805	9.18	-1.87535	8.2526e-28	**
		osa-miR159b	8402490	7843150	787	337	93.6627	42.9674	-1.12423	1.12263e-35	**
		osa-miR159f	8402490	7843150	17	1	2.0232	0.1275	-3.98807	0.000135969	**
		osa-miR160a-5p	8402490	7843150	139	51	16.5427	6.5025	-1.34713	1.7465e-09	**
		osa-miR160b-5p	8402490	7843150	139	51	16.5427	6.5025	-1.34713	1.7465e-09	**
		osa-miR160c-5p	8402490	7843150	139	51	16.5427	6.5025	-1.34713	1.7465e-09	**
		osa-miR160d-5p	8402490	7843150	144	54	17.1378	6.885	-1.31565	1.76856e-09	**
		osa-miR160e-3p	8402490	7843150	4	12	0.476	1.53	1.6845	0.0348756	*
		osa-miR164a	8402490	7843150	206	39	24.5165	4.9725	-2.30171	2.23094e-26	**
		osa-miR164b	8402490	7843150	206	39	24.5165	4.9725	-2.30171	2.23094e-26	**
		osa-miR164c	8402490	7843150	31	13	3.6894	1.6575	-1.15438	0.0128794	*
		osa-miR164d	8402490	7843150	15	1	1.7852	0.1275	-3.80752	0.000457628	**
		osa-miR164f	8402490	7843150	206	39	24.5165	4.9725	-2.30171	2.23094e-26	**
		osa-miR166b-5p	8402490	7843150	57	19	6.7837	2.4225	-1.48558	3.69281e-05	**
		osa-miR166e-3p	8402490	7843150	12	128	1.4281	16.32	3.51447	1.02175e-27	**
		osa-miR166h-5p	8402490	7843150	104	31	12.3773	3.9525	-1.64686	1.61049e-09	**
		osa-miR166k-5p	8402490	7843150	40	9	4.7605	1.1475	-2.05262	1.67074e-05	**
		osa-miR168a-3p	8402490	7843150	24	9	2.8563	1.1475	-1.31565	0.0158714	*
		osa-miR168a-5p	8402490	7843150	41291	18627	4914.14	2374.94	-1.04905	0	**
		osa-miR169a	8402490	7843150	36	11	4.2844	1.4025	-1.61109	0.000542967	**
		osa-miR171i-3p	8402490	7843150	211	72	25.1116	9.18	-1.45179	3.87992e-15	**
		osa-miR172a	8402490	7843150	78	18	9.283	2.295	-2.0161	2.14191e-09	**
		osa-miR172d-3p	8402490	7843150	78	18	9.283	2.295	-2.0161	2.14191e-09	**
		osa-miR1850.1	8402490	7843150	655	288	77.9531	36.7199	-1.08604	1.9672e-28	**
		osa-miR1874-3p	8402490	7843150	24	5	2.8563	0.6375	-2.16365	0.000645355	**
		osa-miR1879	8402490	7843150	11	2	1.3091	0.255	-2.36001	0.0183049	*
		osa-miR2093-3p	8402490	7843150	6	15	0.7141	1.9125	1.42126	0.03569	*
		osa-miR319a-3p	8402490	7843150	78	17	9.283	2.1675	-2.09856	8.09494e-10	**
		osa-miR319b	8402490	7843150	78	18	9.283	2.295	-2.0161	2.14191e-09	**
		osa-miR396a-5p	8402490	7843150	13	3	1.5472	0.3825	-2.01613	0.018676	*
		osa-miR396b-5p	8402490	7843150	13	3	1.5472	0.3825	-2.01613	0.018676	*
		osa-miR396c-3p	8402490	7843150	26	7	3.0943	0.8925	-1.79369	0.00163717	**
		osa-miR396c-5p	8402490	7843150	28	7	3.3323	0.8925	-1.90059	0.000665546	**
		osa-miR396e-5p	8402490	7843150	197	52	23.4454	6.63	-1.82222	4.07515e-19	**
		osa-miR396f-5p	8402490	7843150	197	52	23.4454	6.63	-1.82222	4.07515e-19	**
		osa-miR408-3p	8402490	7843150	3	17	0.357	2.1675	2.60204	0.000868111	**
		osa-miR408-5p	8402490	7843150	55	125	6.5457	15.9375	1.28381	1.01821e-08	**
		osa-miR5074	8402490	7843150	1	9	0.119	1.1475	3.26946	0.00849187	**
		osa-miR5083	8402490	7843150	18	4	2.1422	0.51	-2.07052	0.0043655	**
		osa-miR5150-3p	8402490	7843150	19	4	2.2612	0.51	-2.14852	0.00267996	**
		osa-miR5179	8402490	7843150	43	95	5.1175	12.1125	1.24299	1.1484e-06	**
		osa-miR528-5p	8402490	7843150	1045	5766	124.368	735.164	2.56345	0	**
		osa-miR5486	8402490	7843150	840	199	99.9704	25.3725	-1.97824	4.77368e-85	**
		osa-miR5487	8402490	7843150	1214	253	144.481	32.2574	-2.16318	9.01584e-137	**
		osa-miR5488	8402490	7843150	19	1	2.2612	0.1275	-4.14852	3.99977e-05	**
		osa-miR5490	8402490	7843150	40	9	4.7605	1.1475	-2.05262	1.67074e-05	**
		osa-miR5491	8402490	7843150	102	10	12.1393	1.275	-3.25112	3.06421e-19	**
		osa-miR5496	8402490	7843150	12	2	1.4281	0.255	-2.48553	0.0107993	*
		osa-miR5497	8402490	7843150	2938	704	349.658	89.7599	-1.9618	1.45077e-289	**
		osa-miR5499	8402490	7843150	121	25	14.4005	3.1875	-2.17562	4.169e-15	**
		osa-miR5503	8402490	7843150	33	10	3.9274	1.275	-1.62308	0.000886635	**
		osa-miR5504	8402490	7843150	20	4	2.3802	0.51	-2.22251	0.00163381	**
		osa-miR5506	8402490	7843150	71	8	8.4499	1.02	-3.05037	4.68627e-13	**
		osa-miR5508	8402490	7843150	25	5	2.9753	0.6375	-2.22254	0.000394649	**
		osa-miR5512a	8402490	7843150	21	5	2.4993	0.6375	-1.97103	0.00272211	**
		osa-miR5512b	8402490	7843150	21	5	2.4993	0.6375	-1.97103	0.00272211	**
		osa-miR5516a	8402490	7843150	35	4	4.1654	0.51	-3.02989	5.50438e-07	**
		osa-miR5516b	8402490	7843150	35	4	4.1654	0.51	-3.02989	5.50438e-07	**
		osa-miR5519	8402490	7843150	117	33	13.9244	4.2075	-1.72658	3.58834e-11	**
		osa-miR5521	8402490	7843150	28	4	3.3323	0.51	-2.70795	2.56098e-05	**
		osa-miR5528	8402490	7843150	19	4	2.2612	0.51	-2.14852	0.00267996	**
		osa-miR5538	8402490	7843150	18	0	2.1422	0.01	-7.74295	7.25742e-06	**
		osa-miR5791	8402490	7843150	125	3	14.8765	0.3825	-5.28143	6.75066e-32	**
		osa-miR5792	8402490	7843150	231	13	27.4919	1.6575	-4.05193	8.17276e-50	**
		osa-miR5793	8402490	7843150	672	128	79.9763	16.32	-2.29293	4.34699e-82	**
		osa-miR5797	8402490	7843150	14	0	1.6662	0.01	-7.38042	0.000101414	**
		osa-miR5800	8402490	7843150	154	28	18.3279	3.57	-2.36005	1.19037e-20	**
		osa-miR5802	8402490	7843150	109	47	12.9723	5.9925	-1.1142	4.48095e-06	**
		osa-miR5806	8402490	7843150	1025	231	121.988	29.4525	-2.05027	3.09166e-108	**
		osa-miR5817	8402490	7843150	22	3	2.6183	0.3825	-2.7751	0.000174114	**
		osa-miR5818	8402490	7843150	37	3	4.4035	0.3825	-3.52512	3.43367e-08	**
		osa-miR5834	8402490	7843150	27	10	3.2133	1.275	-1.33356	0.00956733	**
		osa-miR5836	8402490	7843150	13	2	1.5472	0.255	-2.60109	0.00632005	**
		osa-miR5837.2	8402490	7843150	13	1	1.5472	0.1275	-3.60109	0.00152136	**
		osa-miR812n-3p	8402490	7843150	42	18	4.9985	2.295	-1.123	0.00445146	**
		osa-miR812t	8402490	7843150	39	12	4.6415	1.53	-1.60106	0.000333215	**
		osa-miR812u	8402490	7843150	42	17	4.9985	2.1675	-1.20546	0.00262077	**
		osa-miR815a	8402490	7843150	142	64	16.8998	8.16	-1.05037	5.81372e-07	**
	B2-vs-B3	miR_name	B2-total-reads	B3-total-reads	B2-expressed	B3-expressed	B2-std	B3-std	fold-change(log2 B3/B2)	P-value	sig-lable
		osa-miR1319b	7843150	6855146	17	5	2.1675	0.7294	-1.57125	0.0252598	*
		osa-miR1423-5p	7843150	6855146	32	68	4.08	9.9196	1.28171	1.78057e-05	**
		osa-miR159a.2	7843150	6855146	72	7	9.18	1.0211	-3.16837	4.1723e-13	**
		osa-miR160a-5p	7843150	6855146	51	17	6.5025	2.4799	-1.39071	0.000281799	**
		osa-miR160b-5p	7843150	6855146	51	17	6.5025	2.4799	-1.39071	0.000281799	**
		osa-miR160c-5p	7843150	6855146	51	17	6.5025	2.4799	-1.39071	0.000281799	**
		osa-miR160d-3p	7843150	6855146	8	1	1.02	0.1459	-2.80552	0.0364618	*
		osa-miR160d-5p	7843150	6855146	54	17	6.885	2.4799	-1.47317	9.47266e-05	**
		osa-miR160e-5p	7843150	6855146	142	61	18.105	8.8984	-1.02477	1.57996e-06	**
		osa-miR164a	7843150	6855146	39	14	4.9725	2.0423	-1.28378	0.00291818	**
		osa-miR164b	7843150	6855146	39	14	4.9725	2.0423	-1.28378	0.00291818	**
		osa-miR164c	7843150	6855146	13	3	1.6575	0.4376	-1.92132	0.0264594	*
		osa-miR164f	7843150	6855146	39	14	4.9725	2.0423	-1.28378	0.00291818	**
		osa-miR166h-5p	7843150	6855146	31	11	3.9525	1.6046	-1.30055	0.00760777	**
		osa-miR166k-5p	7843150	6855146	9	1	1.1475	0.1459	-2.97544	0.0212022	*
		osa-miR172a	7843150	6855146	18	6	2.295	0.8753	-1.39064	0.0349271	*
		osa-miR172d-3p	7843150	6855146	18	6	2.295	0.8753	-1.39064	0.0349271	*
		osa-miR1862a	7843150	6855146	25	10	3.1875	1.4588	-1.12764	0.0329432	*
		osa-miR1862c	7843150	6855146	22	8	2.805	1.167	-1.2652	0.0290266	*
		osa-miR1868	7843150	6855146	13	36	1.6575	5.2515	1.66372	0.000157049	**
		osa-miR1875	7843150	6855146	46	15	5.865	2.1881	-1.42245	0.000459999	**
		osa-miR2863c	7843150	6855146	2	17	0.255	2.4799	3.28171	0.000129284	**
		osa-miR2865	7843150	6855146	1	7	0.1275	1.0211	3.00156	0.023591	*
		osa-miR319a-3p	7843150	6855146	17	3	2.1675	0.4376	-2.30835	0.00399227	**
		osa-miR319b	7843150	6855146	18	4	2.295	0.5835	-1.97569	0.00698834	**
		osa-miR394	7843150	6855146	97	26	12.3675	3.7928	-1.70522	5.08041e-09	**
		osa-miR408-3p	7843150	6855146	17	3	2.1675	0.4376	-2.30835	0.00399227	**
		osa-miR408-5p	7843150	6855146	125	32	15.9375	4.668	-1.77155	8.88934e-12	**
		osa-miR528-5p	7843150	6855146	5766	589	735.164	85.9209	-3.09698	0	**
		osa-miR529a	7843150	6855146	31	10	3.9525	1.4588	-1.43798	0.00397757	**
		osa-miR5486	7843150	6855146	199	58	25.3725	8.4608	-1.5844	1.55554e-15	**
		osa-miR5487	7843150	6855146	253	65	32.2574	9.4819	-1.76638	2.62028e-22	**
		osa-miR5497	7843150	6855146	704	248	89.7599	36.1772	-1.31099	6.49971e-39	**
		osa-miR5499	7843150	6855146	25	7	3.1875	1.0211	-1.6423	0.00459763	**
		osa-miR5506	7843150	6855146	8	1	1.02	0.1459	-2.80552	0.0364618	*
		osa-miR5519	7843150	6855146	33	9	4.2075	1.3129	-1.68021	0.000869311	**
		osa-miR5793	7843150	6855146	128	32	16.32	4.668	-1.80576	2.61463e-12	**
		osa-miR5800	7843150	6855146	28	11	3.57	1.6046	-1.15371	0.0211876	*
		osa-miR5806	7843150	6855146	231	71	29.4525	10.3572	-1.50776	1.1465e-16	**
		osa-miR5834	7843150	6855146	10	2	1.275	0.2918	-2.12745	0.0409222	*
		osa-miR6250	7843150	6855146	0	7	0.01	1.0211	6.67398	0.00447742	**
		osa-miR6253	7843150	6855146	2	14	0.255	2.0423	3.00163	0.000927868	**
		osa-miR7694-3p	7843150	6855146	3	14	0.3825	2.0423	2.41666	0.00314839	**
		osa-miR812f	7843150	6855146	8	0	1.02	0.01	-6.67243	0.00701523	**
		osa-miR812t	7843150	6855146	12	23	1.53	3.3551	1.13282	0.0245978	*
	B1-vs-B3	miR_name	B1-total-reads	B3-total-reads	B1-expressed	B3-expressed	B1-std	B3-std	fold-change(log2 B3/B1)	P-value	sig-lable
		osa-miR1319b	8402490	6855146	23	5	2.7373	0.7294	-1.90797	0.00341808	**
		osa-miR1432-5p	8402490	6855146	16	2	1.9042	0.2918	-2.70613	0.00311555	**
		osa-miR156l-5p	8402490	6855146	12	1	1.4281	0.1459	-3.29105	0.00586283	**
		osa-miR159a.2	8402490	6855146	283	7	33.6805	1.0211	-5.04372	6.55676e-63	**
		osa-miR159f	8402490	6855146	17	1	2.0232	0.1459	-3.79359	0.000394491	**
		osa-miR160a-5p	8402490	6855146	139	17	16.5427	2.4799	-2.73784	3.80767e-20	**
		osa-miR160b-5p	8402490	6855146	139	17	16.5427	2.4799	-2.73784	3.80767e-20	**
		osa-miR160c-5p	8402490	6855146	139	17	16.5427	2.4799	-2.73784	3.80767e-20	**
		osa-miR160d-3p	8402490	6855146	10	1	1.1901	0.1459	-3.02803	0.0167922	*
		osa-miR160d-5p	8402490	6855146	144	17	17.1378	2.4799	-2.78883	3.36278e-21	**
		osa-miR160e-5p	8402490	6855146	199	61	23.6835	8.8984	-1.41226	7.68925e-13	**
		osa-miR164a	8402490	6855146	206	14	24.5165	2.0423	-3.58549	3.48875e-37	**
		osa-miR164b	8402490	6855146	206	14	24.5165	2.0423	-3.58549	3.48875e-37	**
		osa-miR164c	8402490	6855146	31	3	3.6894	0.4376	-3.0757	6.80944e-06	**
		osa-miR164f	8402490	6855146	206	14	24.5165	2.0423	-3.58549	3.48875e-37	**
		osa-miR166b-5p	8402490	6855146	57	21	6.7837	3.0634	-1.14694	0.00121547	**
		osa-miR166e-3p	8402490	6855146	12	117	1.4281	17.0675	3.57908	4.86653e-28	**
		osa-miR166g-3p	8402490	6855146	40704	15642	4844.28	2281.79	-1.08612	0	**
		osa-miR166h-3p	8402490	6855146	40629	15591	4835.35	2274.35	-1.08817	0	**
		osa-miR166h-5p	8402490	6855146	104	11	12.3773	1.6046	-2.94741	1.69508e-16	**
		osa-miR166k-5p	8402490	6855146	40	1	4.7605	0.1459	-5.02806	9.26942e-10	**
		osa-miR168a-3p	8402490	6855146	24	5	2.8563	0.7294	-1.96937	0.00223516	**
		osa-miR168a-5p	8402490	6855146	41291	11395	4914.14	1662.25	-1.5638	0	**
		osa-miR171c-5p	8402490	6855146	55	17	6.5457	2.4799	-1.40027	0.000209501	**
		osa-miR171d-5p	8402490	6855146	10	1	1.1901	0.1459	-3.02803	0.0167922	*
		osa-miR171e-5p	8402490	6855146	98	36	11.6632	5.2515	-1.15116	1.88925e-05	**
		osa-miR171i-3p	8402490	6855146	211	42	25.1116	6.1268	-2.03515	1.57449e-21	**
		osa-miR171i-5p	8402490	6855146	9	0	1.0711	0.01	-6.74295	0.00513142	**
		osa-miR172a	8402490	6855146	78	6	9.283	0.8753	-3.40674	2.69714e-14	**
		osa-miR172d-3p	8402490	6855146	78	6	9.283	0.8753	-3.40674	2.69714e-14	**
		osa-miR1850.1	8402490	6855146	655	187	77.9531	27.2788	-1.51483	6.63951e-43	**
		osa-miR1862a	8402490	6855146	31	10	3.6894	1.4588	-1.3386	0.00775931	**
		osa-miR1862b	8402490	6855146	31	10	3.6894	1.4588	-1.3386	0.00775931	**
		osa-miR1862c	8402490	6855146	31	8	3.6894	1.167	-1.66058	0.00181969	**
		osa-miR1862e	8402490	6855146	66	108	7.8548	15.7546	1.00413	5.83999e-06	**
		osa-miR1874-3p	8402490	6855146	24	4	2.8563	0.5835	-2.29134	0.000785228	**
		osa-miR1875	8402490	6855146	71	15	8.4499	2.1881	-1.94926	9.50593e-08	**
		osa-miR2093-3p	8402490	6855146	6	15	0.7141	2.1881	1.61548	0.0156768	*
		osa-miR2863c	8402490	6855146	5	17	0.5951	2.4799	2.05908	0.00237945	**
		osa-miR2867-3p	8402490	6855146	57	19	6.7837	2.7716	-1.29135	0.00038488	**
		osa-miR319a-3p	8402490	6855146	78	3	9.283	0.4376	-4.40691	5.73718e-17	**
		osa-miR319b	8402490	6855146	78	4	9.283	0.5835	-3.99179	5.43434e-16	**
		osa-miR394	8402490	6855146	187	26	22.2553	3.7928	-2.55281	8.65044e-25	**
		osa-miR396a-5p	8402490	6855146	13	1	1.5472	0.1459	-3.40661	0.00344076	**
		osa-miR396b-5p	8402490	6855146	13	1	1.5472	0.1459	-3.40661	0.00344076	**
		osa-miR396c-3p	8402490	6855146	26	4	3.0943	0.5835	-2.40681	0.000310974	**
		osa-miR396c-5p	8402490	6855146	28	3	3.3323	0.4376	-2.92883	3.1253e-05	**
		osa-miR396e-5p	8402490	6855146	197	43	23.4454	6.2727	-1.90215	1.28065e-18	**
		osa-miR396f-5p	8402490	6855146	197	43	23.4454	6.2727	-1.90215	1.28065e-18	**
		osa-miR5150-3p	8402490	6855146	19	4	2.2612	0.5835	-1.95428	0.0072791	**
		osa-miR5161	8402490	6855146	19	3	2.2612	0.4376	-2.3694	0.00252847	**
		osa-miR5179	8402490	6855146	43	105	5.1175	15.317	1.58162	1.73179e-10	**
		osa-miR529a	8402490	6855146	36	10	4.2844	1.4588	-1.55431	0.00129856	**
		osa-miR5486	8402490	6855146	840	58	99.9704	8.4608	-3.56264	2.69832e-146	**
		osa-miR5487	8402490	6855146	1214	65	144.481	9.4819	-3.92956	1.98602e-227	**
		osa-miR5488	8402490	6855146	19	0	2.2612	0.01	-7.82094	1.31657e-05	**
		osa-miR5490	8402490	6855146	40	9	4.7605	1.3129	-1.85836	0.000119226	**
		osa-miR5491	8402490	6855146	102	6	12.1393	0.8753	-3.79376	7.39433e-20	**
		osa-miR5497	8402490	6855146	2938	248	349.658	36.1772	-3.27279	0	**
		osa-miR5499	8402490	6855146	121	7	14.4005	1.0211	-3.81792	1.95837e-23	**
		osa-miR5503	8402490	6855146	33	6	3.9274	0.8753	-2.16573	0.000122733	**
		osa-miR5504	8402490	6855146	20	3	2.3802	0.4376	-2.4434	0.00157834	**
		osa-miR5506	8402490	6855146	71	1	8.4499	0.1459	-5.85588	1.4805e-17	**
		osa-miR5508	8402490	6855146	25	3	2.9753	0.4376	-2.76535	0.000139798	**
		osa-miR5512a	8402490	6855146	21	4	2.4993	0.5835	-2.09872	0.00303859	**
		osa-miR5512b	8402490	6855146	21	4	2.4993	0.5835	-2.09872	0.00303859	**
		osa-miR5516a	8402490	6855146	35	0	4.1654	0.01	-8.70231	9.42274e-10	**
		osa-miR5516b	8402490	6855146	35	0	4.1654	0.01	-8.70231	9.42274e-10	**
		osa-miR5518	8402490	6855146	9	0	1.0711	0.01	-6.74295	0.00513142	**
		osa-miR5519	8402490	6855146	117	9	13.9244	1.3129	-3.40679	7.81075e-21	**
		osa-miR5521	8402490	6855146	28	5	3.3323	0.7294	-2.19174	0.000387662	**
		osa-miR5528	8402490	6855146	19	3	2.2612	0.4376	-2.3694	0.00252847	**
		osa-miR5538	8402490	6855146	18	1	2.1422	0.1459	-3.87604	0.00022799	**
		osa-miR5791	8402490	6855146	125	0	14.8765	0.01	-10.5388	4.53989e-33	**
		osa-miR5792	8402490	6855146	231	5	27.4919	0.7294	-5.23615	1.75761e-52	**
		osa-miR5793	8402490	6855146	672	32	79.9763	4.668	-4.0987	1.81679e-130	**
		osa-miR5797	8402490	6855146	14	2	1.6662	0.2918	-2.51351	0.00830787	**
		osa-miR5800	8402490	6855146	154	11	18.3279	1.6046	-3.51376	1.08011e-27	**
		osa-miR5806	8402490	6855146	1025	71	121.988	10.3572	-3.55803	5.93128e-178	**
		osa-miR5817	8402490	6855146	22	5	2.6183	0.7294	-1.84385	0.00519575	**
		osa-miR5818	8402490	6855146	37	3	4.4035	0.4376	-3.33097	3.03984e-07	**
		osa-miR5834	8402490	6855146	27	2	3.2133	0.2918	-3.461	1.0641e-05	**
		osa-miR5836	8402490	6855146	13	1	1.5472	0.1459	-3.40661	0.00344076	**
		osa-miR5837.2	8402490	6855146	13	0	1.5472	0.01	-7.27352	0.000471977	**
		osa-miR6253	8402490	6855146	3	14	0.357	2.0423	2.5162	0.00195428	**
		osa-miR7694-3p	8402490	6855146	1	14	0.119	2.0423	4.10116	0.000113661	**
		osa-miR812a	8402490	6855146	66	25	7.8548	3.6469	-1.1069	0.000699677	**
		osa-miR812b	8402490	6855146	37	15	4.4035	2.1881	-1.00897	0.0196382	*
		osa-miR812c	8402490	6855146	120	44	14.2815	6.4185	-1.15384	2.04689e-06	**
		osa-miR812d	8402490	6855146	21	7	2.4993	1.0211	-1.2914	0.0350423	*
		osa-miR812e	8402490	6855146	122	44	14.5195	6.4185	-1.17768	1.13347e-06	**
		osa-miR812f	8402490	6855146	14	0	1.6662	0.01	-7.38042	0.000259921	**
		osa-miR812g	8402490	6855146	29	10	3.4514	1.4588	-1.2424	0.0152123	*
		osa-miR812h	8402490	6855146	41	14	4.8795	2.0423	-1.25654	0.00335381	**
		osa-miR812i	8402490	6855146	41	13	4.8795	1.8964	-1.36347	0.00179081	**
		osa-miR812j	8402490	6855146	40	11	4.7605	1.6046	-1.5689	0.000625899	**
		osa-miR814b	8402490	6855146	10	1	1.1901	0.1459	-3.02803	0.0167922	*
		osa-miR815a	8402490	6855146	142	52	16.8998	7.5855	-1.15569	2.25189e-07	**
		osa-miR820a	8402490	6855146	443	860	52.7225	125.453	1.25066	7.71299e-53	**
		osa-miR820b	8402490	6855146	443	860	52.7225	125.453	1.25066	7.71299e-53	**
		osa-miR820c	8402490	6855146	443	860	52.7225	125.453	1.25066	7.71299e-53	**
	A1-vs-B1	miR_name	A1-total-reads	B1-total-reads	A1-expressed	B1-expressed	A1-std	B1-std	fold-change(log2 B1/A1)	P-value	sig-lable
		osa-miR1432-5p	8087754	8402490	93	16	11.4989	1.9042	-2.59424	2.83145e-15	**
		osa-miR156l-5p	8087754	8402490	28	12	3.462	1.4281	-1.27751	0.00808904	**
		osa-miR162a	8087754	8402490	25	55	3.0911	6.5457	1.08243	0.00137594	**
		osa-miR164a	8087754	8402490	92	206	11.3752	24.5165	1.10786	2.16332e-10	**
		osa-miR164b	8087754	8402490	92	206	11.3752	24.5165	1.10786	2.16332e-10	**
		osa-miR164f	8087754	8402490	92	206	11.3752	24.5165	1.10786	2.16332e-10	**
		osa-miR166h-5p	8087754	8402490	35	104	4.3275	12.3773	1.51609	9.66595e-09	**
		osa-miR166k-5p	8087754	8402490	7	40	0.8655	4.7605	2.45951	1.19242e-06	**
		osa-miR167a-3p	8087754	8402490	417	133	51.5594	15.8286	-1.7037	1.08152e-37	**
		osa-miR171c-5p	8087754	8402490	120	55	14.8372	6.5457	-1.1806	1.92422e-07	**
		osa-miR172a	8087754	8402490	37	78	4.5748	9.283	1.02088	0.000270817	**
		osa-miR172d-3p	8087754	8402490	37	78	4.5748	9.283	1.02088	0.000270817	**
		osa-miR1846a-5p	8087754	8402490	29	9	3.5857	1.0711	-1.74316	0.00069884	**
		osa-miR1846b-5p	8087754	8402490	29	9	3.5857	1.0711	-1.74316	0.00069884	**
		osa-miR1846e	8087754	8402490	72	34	8.9023	4.0464	-1.13754	9.34643e-05	**
		osa-miR1847.1	8087754	8402490	9	2	1.1128	0.238	-2.22516	0.0328203	*
		osa-miR1849	8087754	8402490	10	3	1.2364	0.357	-1.79215	0.0486473	*
		osa-miR1850.2	8087754	8402490	10	2	1.2364	0.238	-2.37711	0.0187558	*
		osa-miR1852	8087754	8402490	11	3	1.3601	0.357	-1.92972	0.0292624	*
		osa-miR1875	8087754	8402490	24	71	2.9674	8.4499	1.50973	2.42563e-06	**
		osa-miR1883a	8087754	8402490	1	9	0.1236	1.0711	3.11534	0.0139324	*
		osa-miR2093-3p	8087754	8402490	15	6	1.8547	0.7141	-1.37699	0.0425081	*
		osa-miR3980a-3p	8087754	8402490	3	19	0.3709	2.2612	2.60799	0.00067651	**
		osa-miR3980b-3p	8087754	8402490	3	19	0.3709	2.2612	2.60799	0.00067651	**
		osa-miR444d.3	8087754	8402490	18	8	2.2256	0.9521	-1.22501	0.0413341	*
		osa-miR5074	8087754	8402490	9	1	1.1128	0.119	-3.22516	0.00981845	**
		osa-miR5179	8087754	8402490	116	43	14.3427	5.1175	-1.48681	9.71572e-10	**
		osa-miR5486	8087754	8402490	192	840	23.7396	99.9704	2.07421	4.72914e-92	**
		osa-miR5487	8087754	8402490	469	1214	57.9889	144.481	1.31703	3.93906e-70	**
		osa-miR5488	8087754	8402490	0	19	0.01	2.2612	7.82094	2.78387e-06	**
		osa-miR5490	8087754	8402490	18	40	2.2256	4.7605	1.09692	0.00596991	**
		osa-miR5491	8087754	8402490	22	102	2.7202	12.1393	2.1579	4.65704e-13	**
		osa-miR5497	8087754	8402490	1095	2938	135.39	349.658	1.36883	4.14441e-177	**
		osa-miR5499	8087754	8402490	30	121	3.7093	14.4005	1.9569	1.31698e-13	**
		osa-miR5504	8087754	8402490	8	20	0.9891	2.3802	1.26689	0.0313087	*
		osa-miR5506	8087754	8402490	9	71	1.1128	8.4499	2.92474	8.09729e-13	**
		osa-miR5516a	8087754	8402490	11	35	1.3601	4.1654	1.61474	0.000561047	**
		osa-miR5516b	8087754	8402490	11	35	1.3601	4.1654	1.61474	0.000561047	**
		osa-miR5519	8087754	8402490	36	117	4.4512	13.9244	1.64535	1.04592e-10	**
		osa-miR5521	8087754	8402490	4	28	0.4946	3.3323	2.75218	1.76031e-05	**
		osa-miR5528	8087754	8402490	5	19	0.6182	2.2612	1.87094	0.00546092	**
		osa-miR5538	8087754	8402490	4	18	0.4946	2.1422	2.11476	0.00347587	**
		osa-miR5791	8087754	8402490	34	125	4.2039	14.8765	1.82323	7.13945e-13	**
		osa-miR5792	8087754	8402490	62	231	7.6659	27.4919	1.84248	7.10684e-23	**
		osa-miR5793	8087754	8402490	196	672	24.2342	79.9763	1.72253	5.36032e-58	**
		osa-miR5797	8087754	8402490	1	14	0.1236	1.6662	3.75281	0.000677309	**
		osa-miR5800	8087754	8402490	41	154	5.0694	18.3279	1.85415	7.35499e-16	**
		osa-miR5806	8087754	8402490	429	1025	53.0432	121.988	1.20149	8.86102e-52	**
		osa-miR5818	8087754	8402490	11	37	1.3601	4.4035	1.69494	0.000238861	**
		osa-miR5834	8087754	8402490	12	27	1.4837	3.2133	1.11486	0.0228613	*
		osa-miR5836	8087754	8402490	0	13	0.01	1.5472	7.27352	0.000159061	**
		osa-miR6250	8087754	8402490	15	5	1.8547	0.5951	-1.63998	0.0212149	*
		osa-miR6253	8087754	8402490	17	3	2.1019	0.357	-2.5577	0.00110768	**
		osa-miR812g	8087754	8402490	12	29	1.4837	3.4514	1.21798	0.0113082	*
		osa-miR812i	8087754	8402490	19	41	2.3492	4.8795	1.05456	0.0069998	**
		osa-miR812j	8087754	8402490	17	40	2.1019	4.7605	1.17942	0.00357412	**
		osa-miR814b	8087754	8402490	2	10	0.2473	1.1901	2.26675	0.0267771	*
	A2-vs-B2	miR_name	A2-total-reads	B2-total-reads	A2-expressed	B2-expressed	A2-std	B2-std	fold-change(log2 B2/A2)	P-value	sig-lable
		osa-miR1319b	6859995	7843150	5	17	0.7289	2.1675	1.57224	0.0251516	*
		osa-miR1425-5p	6859995	7843150	32	209	4.6647	26.6475	2.51414	2.54449e-28	**
		osa-miR159a.2	6859995	7843150	3	72	0.4373	9.18	4.3918	1.78591e-16	**
		osa-miR160a-3p	6859995	7843150	4	15	0.5831	1.9125	1.71364	0.0261859	*
		osa-miR160a-5p	6859995	7843150	3	51	0.4373	6.5025	3.8943	3.65763e-11	**
		osa-miR160b-3p	6859995	7843150	4	15	0.5831	1.9125	1.71364	0.0261859	*
		osa-miR160b-5p	6859995	7843150	3	51	0.4373	6.5025	3.8943	3.65763e-11	**
		osa-miR160c-5p	6859995	7843150	3	51	0.4373	6.5025	3.8943	3.65763e-11	**
		osa-miR160d-3p	6859995	7843150	1	8	0.1458	1.02	2.80651	0.0363647	*
		osa-miR160d-5p	6859995	7843150	3	54	0.4373	6.885	3.97676	6.5068e-12	**
		osa-miR160e-5p	6859995	7843150	14	142	2.0408	18.105	3.14918	1.7056e-24	**
		osa-miR166k-5p	6859995	7843150	1	9	0.1458	1.1475	2.97643	0.021139	*
		osa-miR1868	6859995	7843150	23	13	3.3528	1.6575	-1.01636	0.0395507	*
		osa-miR2863c	6859995	7843150	10	2	1.4577	0.255	-2.51512	0.0116986	*
		osa-miR2873b	6859995	7843150	6	26	0.8746	3.315	1.92231	0.00127205	**
		osa-miR394	6859995	7843150	0	97	0.01	12.3675	10.2723	3.58837e-27	**
		osa-miR397b	6859995	7843150	1	11	0.1458	1.4025	3.26594	0.00700581	**
		osa-miR408-3p	6859995	7843150	1	17	0.1458	2.1675	3.89397	0.00022989	**
		osa-miR408-5p	6859995	7843150	20	125	2.9155	15.9375	2.45061	4.84432e-17	**
		osa-miR444f	6859995	7843150	2	16	0.2915	2.04	2.807	0.00193683	**
		osa-miR528-5p	6859995	7843150	318	5766	46.3557	735.164	3.98725	0	**
		osa-miR531a	6859995	7843150	18	63	2.6239	8.0325	1.61414	6.32892e-06	**
		osa-miR531b	6859995	7843150	18	63	2.6239	8.0325	1.61414	6.32892e-06	**
		osa-miR531c	6859995	7843150	18	63	2.6239	8.0325	1.61414	6.32892e-06	**
		osa-miR5486	6859995	7843150	68	199	9.9125	25.3725	1.35594	1.21206e-12	**
		osa-miR5505	6859995	7843150	0	12	0.01	1.53	7.25739	0.000566335	**
		osa-miR5519	6859995	7843150	9	33	1.312	4.2075	1.6812	0.000862317	**
		osa-miR5800	6859995	7843150	3	28	0.4373	3.57	3.02923	1.37716e-05	**
		osa-miR5817	6859995	7843150	10	3	1.4577	0.3825	-1.93016	0.0314996	*
	A3-vs-B3	miR_name	A3-total-reads	B3-total-reads	A3-expressed	B3-expressed	A3-std	B3-std	fold-change(log2 B3/A3)	P-value	sig-lable
		osa-miR171c-5p	6946260	6855146	37	17	5.3266	2.4799	-1.10293	0.00747142	**
		osa-miR1846e	6946260	6855146	12	26	1.7275	3.7928	1.13458	0.021281	*
		osa-miR2865	6946260	6855146	0	7	0.01	1.0211	6.67398	0.0074093	**
		osa-miR394	6946260	6855146	6	26	0.8638	3.7928	2.13449	0.000281013	**
		osa-miR396a-5p	6946260	6855146	9	1	1.2957	0.1459	-3.15068	0.0124469	*
		osa-miR396b-5p	6946260	6855146	9	1	1.2957	0.1459	-3.15068	0.0124469	*
		osa-miR5150-3p	6946260	6855146	16	4	2.3034	0.5835	-1.98096	0.00786392	**
		osa-miR5485	6946260	6855146	24	4	3.4551	0.5835	-2.56592	0.000119324	**
		osa-miR5490	6946260	6855146	2	9	0.2879	1.3129	2.18912	0.0364953	*
		osa-miR5497	6946260	6855146	116	248	16.6996	36.1772	1.11527	1.14818e-12	**
		osa-miR5815	6946260	6855146	9	1	1.2957	0.1459	-3.15068	0.0124469	*
		osa-miR6253	6946260	6855146	3	14	0.4319	2.0423	2.24143	0.00694327	**
		osa-miR812f	6946260	6855146	7	0	1.0077	0.01	-6.65492	0.00823477	**
		osa-miR812p	6946260	6855146	9	22	1.2957	3.2093	1.30853	0.0181615	*
