# Supplementary material for: Genetic Subtraction Profiling Identifies Candidate miRNAs Involved in Rice Female Gametophyte Abortion
Source: G3 (Bethesda). 2017 May 19;7(7):2281–93. doi: 10.1534/g3.117.040808 (PMC5499135; doi:10.1534/g3.117.040808)
Supplement: Supplementary file 7 [file 2281TableS5.xlsx]

## Sheet: Sheet1
	Table S5 The coherent target genes of differentially expressed known miRNAs in all comparisons (GO annotation of these genes were listed). The comparisons in which the expression levels of genes were significantly different were labeled with "*". Genes which were targeted by miRNAs that were differentially expressed between fsv1 and Gui 99 and between rice male sterile line and its maintainer lin…
	miRNA	Coherent target gene	Comparison	GO classification
				cellular component	molecular function	biological process
	osa-miR1427	LOC_Os01g11160	A1-vs-A2	GO:0031224//intrinsic to membrane	GO:0015174//basic amino acid transmembrane transporter activity;GO:0015172//acidic amino acid transmembrane transporter activity	GO:0015813//L-glutamate transport;GO:0015809//arginine transport
	osa-miR1427	LOC_Os01g17170	A1-vs-A2	GO:0009941//chloroplast envelope;GO:0009941//chloroplast envelope	GO:0016709//oxidoreductase activity, acting on paired donors, with incorporation or reduction of molecular oxygen, NAD(P)H as one donor, and incorporation of one atom of oxygen;GO:0046914//transition metal ion binding;GO:0016709//oxidoreductase activity, acting on paired donors, with incorporation or reduction of molecular oxygen, NAD(P)H as one donor, and incorporation of one atom of oxygen;GO:0…	GO:0006779//porphyrin-containing compound biosynthetic process;GO:0006779//porphyrin-containing compound biosynthetic process
	osa-miR1427	LOC_Os02g57540	A1-vs-A2	GO:0030529//ribonucleoprotein complex	GO:0005198//structural molecule activity	GO:0010467//gene expression
	osa-miR1427	LOC_Os03g60120	A1-vs-A2	-	-	-
	osa-miR1427	LOC_Os04g02370	A1-vs-A2	GO:0043231//intracellular membrane-bounded organelle	-	-
	osa-miR1427	LOC_Os04g32460	A1-vs-A2	GO:0031090//organelle membrane;GO:0031090//organelle membrane	GO:0042562//hormone binding;GO:0043178//alcohol binding;GO:0042562//hormone binding;GO:0043178//alcohol binding	GO:0048437//floral organ development;GO:0009755//hormone-mediated signaling pathway;GO:0009555//pollen development;GO:0009607//response to biotic stimulus;GO:0048437//floral organ development;GO:0009755//hormone-mediated signaling pathway;GO:0009555//pollen development;GO:0009607//response to biotic stimulus
	osa-miR1427	LOC_Os04g32560	A1-vs-A2	GO:0009536//plastid;GO:0009536//plastid	GO:0016788//hydrolase activity, acting on ester bonds;GO:0003676//nucleic acid binding;GO:0016462//pyrophosphatase activity;GO:0032559//adenyl ribonucleotide binding;GO:0016788//hydrolase activity, acting on ester bonds;GO:0003676//nucleic acid binding;GO:0016462//pyrophosphatase activity;GO:0032559//adenyl ribonucleotide binding	GO:0006281//DNA repair;GO:0006281//DNA repair
	osa-miR1427	LOC_Os06g49340	A1-vs-A2	-	-	-
	osa-miR1427	LOC_Os07g19444	A1-vs-A2	GO:0031410//cytoplasmic vesicle	-	-
	osa-miR1427	LOC_Os08g43150	A1-vs-A2	-	-	-
	osa-miR1427	LOC_Os09g17760	A1-vs-A2	-	-	-
	osa-miR1427	LOC_Os10g35390	A1-vs-A2	GO:0044464//cell part	GO:0016411//acylglycerol O-acyltransferase activity	GO:0006644//phospholipid metabolic process
	osa-miR1436	LOC_Os01g29820	A1-vs-A2	-	-	-
	osa-miR1436	LOC_Os01g34620	A1-vs-A2	GO:0043231//intracellular membrane-bounded organelle;GO:0043231//intracellular membrane-bounded organelle;GO:0043231//intracellular membrane-bounded organelle;GO:0043231//intracellular membrane-bounded organelle;GO:0043231//intracellular membrane-bounded organelle;GO:0043231//intracellular membrane-bounded organelle;GO:0043231//intracellular membrane-bounded organelle;GO:0043231//intracellular me…	GO:0015036//disulfide oxidoreductase activity;GO:0015036//disulfide oxidoreductase activity;GO:0015036//disulfide oxidoreductase activity;GO:0015036//disulfide oxidoreductase activity;GO:0015036//disulfide oxidoreductase activity;GO:0015036//disulfide oxidoreductase activity;GO:0015036//disulfide oxidoreductase activity;GO:0015036//disulfide oxidoreductase activity;GO:0015036//disulfide oxidoredu…	GO:0019725//cellular homeostasis;GO:0019725//cellular homeostasis;GO:0019725//cellular homeostasis;GO:0019725//cellular homeostasis;GO:0019725//cellular homeostasis;GO:0019725//cellular homeostasis;GO:0019725//cellular homeostasis;GO:0019725//cellular homeostasis;GO:0019725//cellular homeostasis
	osa-miR1436	LOC_Os01g39680	A1-vs-A2	GO:0043231//intracellular membrane-bounded organelle;GO:0043231//intracellular membrane-bounded organelle;GO:0043231//intracellular membrane-bounded organelle	-	-
	osa-miR1436	LOC_Os01g52760	A1-vs-A2	GO:0043231//intracellular membrane-bounded organelle;GO:0043231//intracellular membrane-bounded organelle	-	-
	osa-miR1436	LOC_Os01g60780	A1-vs-A2	GO:0043231//intracellular membrane-bounded organelle;GO:0043231//intracellular membrane-bounded organelle	-	-
	osa-miR1436	LOC_Os01g61010	A1-vs-A2	GO:0044464//cell part;GO:0044464//cell part	-	-
	osa-miR1436	LOC_Os01g68230	A1-vs-A2	-	-	-
	osa-miR1436	LOC_Os01g73250	A1-vs-A2	-	-	-
	osa-miR1436	LOC_Os02g05810	A1-vs-A2	GO:0043231//intracellular membrane-bounded organelle;GO:0043231//intracellular membrane-bounded organelle	-	-
	osa-miR1436	LOC_Os02g21460	A1-vs-A2	GO:0009536//plastid;GO:0009536//plastid	GO:0003824//catalytic activity;GO:0003824//catalytic activity	GO:0010038//response to metal ion;GO:0010038//response to metal ion
	osa-miR1436	LOC_Os02g26984	A1-vs-A2	-	-	-
	osa-miR1436	LOC_Os02g29140	A1-vs-A2*	-	-	-
	osa-miR1436	LOC_Os02g34950	A1-vs-A2	GO:0015630//microtubule cytoskeleton	GO:0032559//adenyl ribonucleotide binding	GO:0007275//multicellular organismal development;GO:0003006//developmental process involved in reproduction;GO:0009987//cellular process
	osa-miR1436	LOC_Os02g37140	A1-vs-A2	-	-	-
	osa-miR1436	LOC_Os02g37950	A1-vs-A2	-	-	-
	osa-miR1436	LOC_Os02g38750	A1-vs-A2	-	-	-
	osa-miR1436	LOC_Os02g40870	A1-vs-A2	GO:0043234//protein complex;GO:0016020//membrane;GO:0043234//protein complex;GO:0016020//membrane	GO:0016757//transferase activity, transferring glycosyl groups;GO:0016757//transferase activity, transferring glycosyl groups	GO:0009856//pollination;GO:0006497//protein lipidation;GO:0000904//cell morphogenesis involved in differentiation;GO:0009856//pollination;GO:0006497//protein lipidation;GO:0000904//cell morphogenesis involved in differentiation
	osa-miR1436	LOC_Os02g43370	A1-vs-A2	GO:0031224//intrinsic to membrane;GO:0031224//intrinsic to membrane	-	GO:0000041//transition metal ion transport;GO:0000041//transition metal ion transport
	osa-miR1436	LOC_Os02g49620	A1-vs-A2	-	-	-
	osa-miR1436	LOC_Os02g56360	A1-vs-A2	GO:0043231//intracellular membrane-bounded organelle;GO:0043231//intracellular membrane-bounded organelle	-	-
	osa-miR1436	LOC_Os03g01240	A1-vs-A2	GO:0044464//cell part	-	-
	osa-miR1436	LOC_Os03g08530	A1-vs-A2	-	GO:0048037//cofactor binding;GO:0016846//carbon-sulfur lyase activity;GO:0047635//alanine-oxo-acid transaminase activity	GO:0008652//cellular amino acid biosynthetic process
	osa-miR1436	LOC_Os03g39610	A1-vs-A2*	GO:0009536//plastid;GO:0009521;GO:0031224//intrinsic to membrane;GO:0009534//chloroplast thylakoid	GO:0046906//tetrapyrrole binding;GO:0043169//cation binding	GO:0006091//generation of precursor metabolites and energy;GO:0006464//cellular protein modification process;GO:0006091//generation of precursor metabolites and energy
	osa-miR1436	LOC_Os03g44835	A1-vs-A2	-	-	-
	osa-miR1436	LOC_Os03g48010	A1-vs-A2	GO:0044444//cytoplasmic part;GO:0043231//intracellular membrane-bounded organelle	GO:0016757//transferase activity, transferring glycosyl groups	-
	osa-miR1436	LOC_Os03g49126	A1-vs-A2	-	-	-
	osa-miR1436	LOC_Os03g54130	A1-vs-A2	-	GO:0070011//peptidase activity, acting on L-amino acid peptides	GO:0008152//metabolic process
	osa-miR1436	LOC_Os04g32610	A1-vs-A2	GO:0031410//cytoplasmic vesicle;GO:0031410//cytoplasmic vesicle;GO:0031410//cytoplasmic vesicle;GO:0031410//cytoplasmic vesicle;GO:0031410//cytoplasmic vesicle	-	-
	osa-miR1436	LOC_Os04g39160	A1-vs-A2	-	GO:0034062//RNA polymerase activity;GO:0005488//binding	-
	osa-miR1436	LOC_Os05g39540	A1-vs-A2	GO:0044464//cell part;GO:0031224//intrinsic to membrane;GO:0031410//cytoplasmic vesicle	GO:0046914//transition metal ion binding;GO:0046915//transition metal ion transmembrane transporter activity	GO:0030001//metal ion transport;GO:0000041//transition metal ion transport
	osa-miR1436	LOC_Os05g45580	A1-vs-A2	-	-	-
	osa-miR1436	LOC_Os05g48940	A1-vs-A2	-	-	-
	osa-miR1436	LOC_Os06g05630	A1-vs-A2	GO:0031410//cytoplasmic vesicle;GO:0031410//cytoplasmic vesicle;GO:0031410//cytoplasmic vesicle	GO:0016787//hydrolase activity;GO:0016787//hydrolase activity;GO:0016787//hydrolase activity	GO:0044238//primary metabolic process;GO:0044238//primary metabolic process;GO:0044238//primary metabolic process
	osa-miR1436	LOC_Os06g11090	A1-vs-A2	-	-	-
	osa-miR1436	LOC_Os06g11500	A1-vs-A2	-	GO:0003676//nucleic acid binding;GO:0042623//ATPase activity, coupled;GO:0032559//adenyl ribonucleotide binding	GO:0006259//DNA metabolic process
	osa-miR1436	LOC_Os06g19990	A1-vs-A2	GO:0031410//cytoplasmic vesicle;GO:0031410//cytoplasmic vesicle;GO:0031410//cytoplasmic vesicle;GO:0031410//cytoplasmic vesicle	-	-
	osa-miR1436	LOC_Os06g23274	A1-vs-A2	GO:0044464//cell part	-	-
	osa-miR1436	LOC_Os06g35590	A1-vs-A2	-	GO:0003824//catalytic activity	-
	osa-miR1436	LOC_Os07g03110	A1-vs-A2	-	-	-
	osa-miR1436	LOC_Os07g22930	A1-vs-A2	GO:0009536//plastid;GO:0009536//plastid;GO:0009536//plastid	GO:0046527//glucosyltransferase activity;GO:0046527//glucosyltransferase activity;GO:0046527//glucosyltransferase activity	GO:0005982//starch metabolic process;GO:0005977//glycogen metabolic process;GO:0005982//starch metabolic process;GO:0005977//glycogen metabolic process;GO:0005982//starch metabolic process;GO:0005977//glycogen metabolic process
	osa-miR1436	LOC_Os07g30250	A1-vs-A2	GO:0031224//intrinsic to membrane	GO:0022892//substrate-specific transporter activity	GO:0010876//lipid localization
	osa-miR1436	LOC_Os07g41280	A1-vs-A2	-	GO:0004091//carboxylesterase activity;GO:0004091//carboxylesterase activity;GO:0004091//carboxylesterase activity	GO:0006007//glucose catabolic process;GO:0006007//glucose catabolic process;GO:0006007//glucose catabolic process
	osa-miR1436	LOC_Os08g04300	A1-vs-A2	-	-	-
	osa-miR1436	LOC_Os08g04920	A1-vs-A2	GO:0043231//intracellular membrane-bounded organelle;GO:0043231//intracellular membrane-bounded organelle;GO:0043231//intracellular membrane-bounded organelle;GO:0043231//intracellular membrane-bounded organelle;GO:0043231//intracellular membrane-bounded organelle;GO:0043231//intracellular membrane-bounded organelle;GO:0043231//intracellular membrane-bounded organelle;GO:0043231//intracellular me…	-	-
	osa-miR1436	LOC_Os08g19114	A1-vs-A2	GO:0043231//intracellular membrane-bounded organelle	-	-
	osa-miR1436	LOC_Os08g20544	A1-vs-A2	GO:0044464//cell part	-	-
	osa-miR1436	LOC_Os08g25010	A1-vs-A2	GO:0044464//cell part	GO:0005099//Ras GTPase activator activity	GO:0032318//regulation of Ras GTPase activity
	osa-miR1436	LOC_Os08g30930	A1-vs-A2	-	-	-
	osa-miR1436	LOC_Os09g04420	A1-vs-A2	-	-	-
	osa-miR1436	LOC_Os09g07320	A1-vs-A2	GO:0043231//intracellular membrane-bounded organelle;GO:0043231//intracellular membrane-bounded organelle	GO:0004091//carboxylesterase activity;GO:0004091//carboxylesterase activity	-
	osa-miR1436	LOC_Os09g10710	A1-vs-A2	-	-	-
	osa-miR1436	LOC_Os09g29370	A1-vs-A2	-	GO:0046914//transition metal ion binding	-
	osa-miR1436	LOC_Os09g32270	A1-vs-A2	-	-	-
	osa-miR1436	LOC_Os09g33930	A1-vs-A2	GO:0043234//protein complex;GO:0043234//protein complex;GO:0043234//protein complex;GO:0043234//protein complex;GO:0043234//protein complex	GO:0046983//protein dimerization activity;GO:0008318//protein prenyltransferase activity;GO:0046983//protein dimerization activity;GO:0008318//protein prenyltransferase activity;GO:0004661//protein geranylgeranyltransferase activity;GO:0046983//protein dimerization activity;GO:0046983//protein dimerization activity;GO:0008318//protein prenyltransferase activity;GO:0046983//protein dimerization ac…	GO:0065008//regulation of biological quality;GO:0018342//protein prenylation;GO:2000026//regulation of multicellular organismal development;GO:0009738//abscisic acid mediated signaling pathway;GO:0006950//response to stress;GO:0065008;GO:0018342//protein prenylation;GO:2000026//regulation of multicellular organismal development;GO:0009738//abscisic acid mediated signaling pathway;GO:0006950//resp…
	osa-miR1436	LOC_Os09g36100	A1-vs-A2	GO:0043231//intracellular membrane-bounded organelle;GO:0043231//intracellular membrane-bounded organelle	-	-
	osa-miR1436	LOC_Os09g37020	A1-vs-A2	GO:0031410//cytoplasmic vesicle;GO:0031410//cytoplasmic vesicle	-	-
	osa-miR1436	LOC_Os09g39960	A1-vs-A2	-	GO:0032561//guanyl ribonucleotide binding;GO:0017111//nucleoside-triphosphatase activity	GO:0009207//purine ribonucleoside triphosphate catabolic process
	osa-miR1436	LOC_Os10g01080	A1-vs-A2	-	-	GO:0008614//pyridoxine metabolic process;GO:0050896//response to stimulus;GO:0009108//coenzyme biosynthetic process
	osa-miR1436	LOC_Os10g13694	A1-vs-A2	GO:0044424//intracellular part;GO:0044424//intracellular part	GO:0004611//phosphoenolpyruvate carboxykinase activity;GO:0032559//adenyl ribonucleotide binding;GO:0016772//transferase activity, transferring phosphorus-containing groups;GO:0004611//phosphoenolpyruvate carboxykinase activity;GO:0032559//adenyl ribonucleotide binding;GO:0016772//transferase activity, transferring phosphorus-containing groups	GO:0006006//glucose metabolic process;GO:0006796//phosphate-containing compound metabolic process;GO:0006006//glucose metabolic process;GO:0006796//phosphate-containing compound metabolic process
	osa-miR1436	LOC_Os10g38110	A1-vs-A2	GO:0031410//cytoplasmic vesicle;GO:0031410//cytoplasmic vesicle	GO:0016491//oxidoreductase activity;GO:0005506//iron ion binding;GO:0016491//oxidoreductase activity;GO:0005506//iron ion binding	GO:0006091//generation of precursor metabolites and energy;GO:0006091//generation of precursor metabolites and energy
	osa-miR1436	LOC_Os10g40740	A1-vs-A2	-	-	-
	osa-miR1436	LOC_Os11g12040	A1-vs-A2	-	GO:0000166//nucleotide binding	-
	osa-miR1436	LOC_Os11g14390	A1-vs-A2	-	-	-
	osa-miR1436	LOC_Os11g24540	A1-vs-A2	GO:0031224//intrinsic to membrane;GO:0031410//cytoplasmic vesicle;GO:0031224//intrinsic to membrane;GO:0031410//cytoplasmic vesicle	GO:0004175//endopeptidase activity;GO:0004175//endopeptidase activity	-
	osa-miR1436	LOC_Os11g27799	A1-vs-A2	-	-	-
	osa-miR1436	LOC_Os11g43760	A1-vs-A2	-	GO:0004091//carboxylesterase activity	GO:0006629//lipid metabolic process
	osa-miR1436	LOC_Os12g01680	A1-vs-A2	GO:0044464//cell part	GO:0016862//intramolecular oxidoreductase activity, interconverting keto- and enol-groups	-
	osa-miR1436	LOC_Os12g01900	A1-vs-A2	GO:0044464//cell part	-	-
	osa-miR1436	LOC_Os12g16350	A1-vs-A2	-	-	-
	osa-miR1436	LOC_Os12g18729	A1-vs-A2	GO:0043231//intracellular membrane-bounded organelle;GO:0043231//intracellular membrane-bounded organelle;GO:0043231//intracellular membrane-bounded organelle;GO:0043231//intracellular membrane-bounded organelle;GO:0043231//intracellular membrane-bounded organelle	-	-
	osa-miR1436	LOC_Os12g31860	A1-vs-A2*	GO:0031410//cytoplasmic vesicle;GO:0031410//cytoplasmic vesicle;GO:0031410//cytoplasmic vesicle;GO:0031410//cytoplasmic vesicle;GO:0031410//cytoplasmic vesicle;GO:0016020//membrane;GO:0031410//cytoplasmic vesicle	-	-
	osa-miR1436	LOC_Os12g42044	A1-vs-A2	GO:0031410//cytoplasmic vesicle;GO:0031410//cytoplasmic vesicle;GO:0031410//cytoplasmic vesicle;GO:0031410//cytoplasmic vesicle;GO:0031410//cytoplasmic vesicle	GO:0046872//metal ion binding;GO:0004672//protein kinase activity;GO:0032559//adenyl ribonucleotide binding;GO:0046872//metal ion binding;GO:0004672//protein kinase activity;GO:0032559//adenyl ribonucleotide binding;GO:0046872//metal ion binding;GO:0004672//protein kinase activity;GO:0032559//adenyl ribonucleotide binding;GO:0046872//metal ion binding;GO:0004672//protein kinase activity;GO:003255…	GO:0006464//cellular protein modification process;GO:0006464//cellular protein modification process;GO:0006464//cellular protein modification process;GO:0006464//cellular protein modification process;GO:0006464//cellular protein modification process
	osa-miR1436	LOC_Os12g44250	A1-vs-A2	GO:0016020//membrane	-	GO:0006810//transport
	osa-miR1436	LOC_Os12g44350	A1-vs-A2*	GO:0043232//intracellular non-membrane-bounded organelle;GO:0043231//intracellular membrane-bounded organelle;GO:0016020//membrane	GO:0032559//adenyl ribonucleotide binding	GO:0007010//cytoskeleton organization
	osa-miR1440b	LOC_Os04g09900	A1-vs-A2	GO:0043231//intracellular membrane-bounded organelle;GO:0043231//intracellular membrane-bounded organelle;GO:0043231//intracellular membrane-bounded organelle	GO:0016872//intramolecular lyase activity;GO:0016872//intramolecular lyase activity;GO:0016872//intramolecular lyase activity	GO:0016101//diterpenoid metabolic process;GO:0046246//terpene biosynthetic process;GO:0016101//diterpenoid metabolic process;GO:0046246//terpene biosynthetic process;GO:0016101//diterpenoid metabolic process;GO:0046246//terpene biosynthetic process
	osa-miR1440b	LOC_Os04g28780	A1-vs-A2	GO:0031410//cytoplasmic vesicle	-	-
	osa-miR156a	LOC_Os02g04680	A1-vs-A2	-	-	-
	osa-miR156a	LOC_Os02g07780	A1-vs-A2	-	-	-
	osa-miR156a	LOC_Os02g18810	A1-vs-A2	GO:0031410//cytoplasmic vesicle;GO:0043231//intracellular membrane-bounded organelle;GO:0043231//intracellular membrane-bounded organelle	-	-
	osa-miR156a	LOC_Os02g34860	A1-vs-A2	GO:0044444//cytoplasmic part;GO:0043231//intracellular membrane-bounded organelle	GO:0005488//binding	GO:0009411//response to UV
	osa-miR156a	LOC_Os03g03720	A1-vs-A2	GO:0009536//plastid;GO:0009536//plastid	GO:0000166//nucleotide binding;GO:0000166//nucleotide binding	GO:0015977//carbon fixation;GO:0006007//glucose catabolic process;GO:0015977//carbon fixation;GO:0006007//glucose catabolic process
	osa-miR156a	LOC_Os04g01690	A1-vs-A2*	-	GO:0016831//carboxy-lyase activity;GO:0016831//carboxy-lyase activity;GO:0016831//carboxy-lyase activity	GO:0006525//arginine metabolic process;GO:0006596//polyamine biosynthetic process;GO:0006525//arginine metabolic process;GO:0006596//polyamine biosynthetic process;GO:0006525//arginine metabolic process;GO:0006596//polyamine biosynthetic process
	osa-miR156a	LOC_Os04g25784	A1-vs-A2	-	-	-
	osa-miR156a	LOC_Os05g05170	A1-vs-A2	-	-	-
	osa-miR156a	LOC_Os06g34440	A1-vs-A2	-	-	-
	osa-miR156a	LOC_Os06g45310	A1-vs-A2	-	-	-
	osa-miR156a	LOC_Os06g50300	A1-vs-A2	GO:0044432//endoplasmic reticulum part;GO:0031410//cytoplasmic vesicle	GO:0005515//protein binding;GO:0032559//adenyl ribonucleotide binding	GO:0050896//response to stimulus;GO:0044267//cellular protein metabolic process
	osa-miR156a	LOC_Os07g42400	A1-vs-A2	GO:0043231//intracellular membrane-bounded organelle;GO:0043231//intracellular membrane-bounded organelle	GO:0046914//transition metal ion binding;GO:0003677//DNA binding;GO:0001071//nucleic acid binding transcription factor activity;GO:0046914//transition metal ion binding;GO:0003677//DNA binding;GO:0001071//nucleic acid binding transcription factor activity	GO:0006351//transcription, DNA-dependent;GO:0006351//transcription, DNA-dependent
	osa-miR156a	LOC_Os08g10550	A1-vs-A2	GO:0044464//cell part	GO:0046873//metal ion transmembrane transporter activity	GO:0030001//metal ion transport;GO:0034220//ion transmembrane transport
	osa-miR156a	LOC_Os09g32944	A1-vs-A2	-	-	-
	osa-miR156a	LOC_Os09g33820	A1-vs-A2	-	GO:0008374//O-acyltransferase activity;GO:0008374//O-acyltransferase activity;GO:0008374//O-acyltransferase activity	GO:0044238//primary metabolic process;GO:0044238//primary metabolic process;GO:0044238//primary metabolic process
	osa-miR156a	LOC_Os11g30370	A1-vs-A2	-	-	-
	osa-miR156b-5p	LOC_Os02g04680	A1-vs-A2	-	-	-
	osa-miR156b-5p	LOC_Os02g07780	A1-vs-A2	-	-	-
	osa-miR156b-5p	LOC_Os02g18810	A1-vs-A2	GO:0031410//cytoplasmic vesicle;GO:0043231//intracellular membrane-bounded organelle;GO:0043231//intracellular membrane-bounded organelle	-	-
	osa-miR156b-5p	LOC_Os02g34860	A1-vs-A2	GO:0044444//cytoplasmic part;GO:0043231//intracellular membrane-bounded organelle	GO:0005488//binding	GO:0009411//response to UV
	osa-miR156b-5p	LOC_Os03g03720	A1-vs-A2	GO:0009536//plastid;GO:0009536//plastid	GO:0000166//nucleotide binding;GO:0000166//nucleotide binding	GO:0015977//carbon fixation;GO:0006007//glucose catabolic process;GO:0015977//carbon fixation;GO:0006007//glucose catabolic process
	osa-miR156b-5p	LOC_Os04g01690	A1-vs-A2*	-	GO:0016831//carboxy-lyase activity;GO:0016831//carboxy-lyase activity;GO:0016831//carboxy-lyase activity	GO:0006525//arginine metabolic process;GO:0006596//polyamine biosynthetic process;GO:0006525//arginine metabolic process;GO:0006596//polyamine biosynthetic process;GO:0006525//arginine metabolic process;GO:0006596//polyamine biosynthetic process
	osa-miR156b-5p	LOC_Os04g25784	A1-vs-A2	-	-	-
	osa-miR156b-5p	LOC_Os05g05170	A1-vs-A2	-	-	-
	osa-miR156b-5p	LOC_Os06g34440	A1-vs-A2	-	-	-
	osa-miR156b-5p	LOC_Os06g45310	A1-vs-A2	-	-	-
	osa-miR156b-5p	LOC_Os06g50300	A1-vs-A2	GO:0044432//endoplasmic reticulum part;GO:0031410//cytoplasmic vesicle	GO:0005515//protein binding;GO:0032559//adenyl ribonucleotide binding	GO:0050896//response to stimulus;GO:0044267//cellular protein metabolic process
	osa-miR156b-5p	LOC_Os07g42400	A1-vs-A2	GO:0043231//intracellular membrane-bounded organelle;GO:0043231//intracellular membrane-bounded organelle	GO:0046914//transition metal ion binding;GO:0003677//DNA binding;GO:0001071//nucleic acid binding transcription factor activity;GO:0046914//transition metal ion binding;GO:0003677//DNA binding;GO:0001071//nucleic acid binding transcription factor activity	GO:0006351//transcription, DNA-dependent;GO:0006351//transcription, DNA-dependent
	osa-miR156b-5p	LOC_Os08g10550	A1-vs-A2	GO:0044464//cell part	GO:0046873//metal ion transmembrane transporter activity	GO:0030001//metal ion transport;GO:0034220//ion transmembrane transport
	osa-miR156b-5p	LOC_Os09g32944	A1-vs-A2	-	-	-
	osa-miR156b-5p	LOC_Os09g33820	A1-vs-A2	-	GO:0008374//O-acyltransferase activity;GO:0008374//O-acyltransferase activity;GO:0008374//O-acyltransferase activity	GO:0044238//primary metabolic process;GO:0044238//primary metabolic process;GO:0044238//primary metabolic process
	osa-miR156b-5p	LOC_Os11g30370	A1-vs-A2	-	-	-
	osa-miR156c-5p	LOC_Os02g04680	A1-vs-A2	-	-	-
	osa-miR156c-5p	LOC_Os02g07780	A1-vs-A2	-	-	-
	osa-miR156c-5p	LOC_Os02g18810	A1-vs-A2	GO:0031410//cytoplasmic vesicle;GO:0043231//intracellular membrane-bounded organelle;GO:0043231//intracellular membrane-bounded organelle	-	-
	osa-miR156c-5p	LOC_Os02g34860	A1-vs-A2	GO:0044444//cytoplasmic part;GO:0043231//intracellular membrane-bounded organelle	GO:0005488//binding	GO:0009411//response to UV
	osa-miR156c-5p	LOC_Os03g03720	A1-vs-A2	GO:0009536//plastid;GO:0009536//plastid	GO:0000166//nucleotide binding;GO:0000166//nucleotide binding	GO:0015977//carbon fixation;GO:0006007//glucose catabolic process;GO:0015977//carbon fixation;GO:0006007//glucose catabolic process
	osa-miR156c-5p	LOC_Os04g01690	A1-vs-A2*	-	GO:0016831//carboxy-lyase activity;GO:0016831//carboxy-lyase activity;GO:0016831//carboxy-lyase activity	GO:0006525//arginine metabolic process;GO:0006596//polyamine biosynthetic process;GO:0006525//arginine metabolic process;GO:0006596//polyamine biosynthetic process;GO:0006525//arginine metabolic process;GO:0006596//polyamine biosynthetic process
	osa-miR156c-5p	LOC_Os04g25784	A1-vs-A2	-	-	-
	osa-miR156c-5p	LOC_Os05g05170	A1-vs-A2	-	-	-
	osa-miR156c-5p	LOC_Os06g34440	A1-vs-A2	-	-	-
	osa-miR156c-5p	LOC_Os06g45310	A1-vs-A2	-	-	-
	osa-miR156c-5p	LOC_Os06g50300	A1-vs-A2	GO:0044432//endoplasmic reticulum part;GO:0031410//cytoplasmic vesicle	GO:0005515//protein binding;GO:0032559//adenyl ribonucleotide binding	GO:0050896//response to stimulus;GO:0044267//cellular protein metabolic process
	osa-miR156c-5p	LOC_Os07g42400	A1-vs-A2	GO:0043231//intracellular membrane-bounded organelle;GO:0043231//intracellular membrane-bounded organelle	GO:0046914//transition metal ion binding;GO:0003677//DNA binding;GO:0001071//nucleic acid binding transcription factor activity;GO:0046914//transition metal ion binding;GO:0003677//DNA binding;GO:0001071//nucleic acid binding transcription factor activity	GO:0006351//transcription, DNA-dependent;GO:0006351//transcription, DNA-dependent
	osa-miR156c-5p	LOC_Os08g10550	A1-vs-A2	GO:0044464//cell part	GO:0046873//metal ion transmembrane transporter activity	GO:0030001//metal ion transport;GO:0034220//ion transmembrane transport
	osa-miR156c-5p	LOC_Os09g32944	A1-vs-A2	-	-	-
	osa-miR156c-5p	LOC_Os09g33820	A1-vs-A2	-	GO:0008374//O-acyltransferase activity;GO:0008374//O-acyltransferase activity;GO:0008374//O-acyltransferase activity	GO:0044238//primary metabolic process;GO:0044238//primary metabolic process;GO:0044238//primary metabolic process
	osa-miR156c-5p	LOC_Os11g30370	A1-vs-A2	-	-	-
	osa-miR156d	LOC_Os02g04680	A1-vs-A2	-	-	-
	osa-miR156d	LOC_Os02g07780	A1-vs-A2	-	-	-
	osa-miR156d	LOC_Os02g18810	A1-vs-A2	GO:0031410//cytoplasmic vesicle;GO:0043231//intracellular membrane-bounded organelle;GO:0043231//intracellular membrane-bounded organelle	-	-
	osa-miR156d	LOC_Os02g34860	A1-vs-A2	GO:0044444//cytoplasmic part;GO:0043231//intracellular membrane-bounded organelle	GO:0005488//binding	GO:0009411//response to UV
	osa-miR156d	LOC_Os03g03720	A1-vs-A2	GO:0009536//plastid;GO:0009536//plastid	GO:0000166//nucleotide binding;GO:0000166//nucleotide binding	GO:0015977//carbon fixation;GO:0006007//glucose catabolic process;GO:0015977//carbon fixation;GO:0006007//glucose catabolic process
	osa-miR156d	LOC_Os04g01690	A1-vs-A2*	-	GO:0016831//carboxy-lyase activity;GO:0016831//carboxy-lyase activity;GO:0016831//carboxy-lyase activity	GO:0006525//arginine metabolic process;GO:0006596//polyamine biosynthetic process;GO:0006525//arginine metabolic process;GO:0006596//polyamine biosynthetic process;GO:0006525//arginine metabolic process;GO:0006596//polyamine biosynthetic process
	osa-miR156d	LOC_Os04g25784	A1-vs-A2	-	-	-
	osa-miR156d	LOC_Os05g05170	A1-vs-A2	-	-	-
	osa-miR156d	LOC_Os06g34440	A1-vs-A2	-	-	-
	osa-miR156d	LOC_Os06g45310	A1-vs-A2	-	-	-
	osa-miR156d	LOC_Os06g50300	A1-vs-A2	GO:0044432//endoplasmic reticulum part;GO:0031410//cytoplasmic vesicle	GO:0005515//protein binding;GO:0032559//adenyl ribonucleotide binding	GO:0050896//response to stimulus;GO:0044267//cellular protein metabolic process
	osa-miR156d	LOC_Os07g42400	A1-vs-A2	GO:0043231//intracellular membrane-bounded organelle;GO:0043231//intracellular membrane-bounded organelle	GO:0046914//transition metal ion binding;GO:0003677//DNA binding;GO:0001071//nucleic acid binding transcription factor activity;GO:0046914//transition metal ion binding;GO:0003677//DNA binding;GO:0001071//nucleic acid binding transcription factor activity	GO:0006351//transcription, DNA-dependent;GO:0006351//transcription, DNA-dependent
	osa-miR156d	LOC_Os08g10550	A1-vs-A2	GO:0044464//cell part	GO:0046873//metal ion transmembrane transporter activity	GO:0030001//metal ion transport;GO:0034220//ion transmembrane transport
	osa-miR156d	LOC_Os09g32944	A1-vs-A2	-	-	-
	osa-miR156d	LOC_Os09g33820	A1-vs-A2	-	GO:0008374//O-acyltransferase activity;GO:0008374//O-acyltransferase activity;GO:0008374//O-acyltransferase activity	GO:0044238//primary metabolic process;GO:0044238//primary metabolic process;GO:0044238//primary metabolic process
	osa-miR156d	LOC_Os11g30370	A1-vs-A2	-	-	-
	osa-miR156e	LOC_Os02g04680	A1-vs-A2	-	-	-
	osa-miR156e	LOC_Os02g07780	A1-vs-A2	-	-	-
	osa-miR156e	LOC_Os02g18810	A1-vs-A2	GO:0031410//cytoplasmic vesicle;GO:0043231//intracellular membrane-bounded organelle;GO:0043231//intracellular membrane-bounded organelle	-	-
	osa-miR156e	LOC_Os02g34860	A1-vs-A2	GO:0044444//cytoplasmic part;GO:0043231//intracellular membrane-bounded organelle	GO:0005488//binding	GO:0009411//response to UV
	osa-miR156e	LOC_Os03g03720	A1-vs-A2	GO:0009536//plastid;GO:0009536//plastid	GO:0000166//nucleotide binding;GO:0000166//nucleotide binding	GO:0015977//carbon fixation;GO:0006007//glucose catabolic process;GO:0015977//carbon fixation;GO:0006007//glucose catabolic process
	osa-miR156e	LOC_Os04g01690	A1-vs-A2*	-	GO:0016831//carboxy-lyase activity;GO:0016831//carboxy-lyase activity;GO:0016831//carboxy-lyase activity	GO:0006525//arginine metabolic process;GO:0006596//polyamine biosynthetic process;GO:0006525//arginine metabolic process;GO:0006596//polyamine biosynthetic process;GO:0006525//arginine metabolic process;GO:0006596//polyamine biosynthetic process
	osa-miR156e	LOC_Os04g25784	A1-vs-A2	-	-	-
	osa-miR156e	LOC_Os05g05170	A1-vs-A2	-	-	-
	osa-miR156e	LOC_Os06g34440	A1-vs-A2	-	-	-
	osa-miR156e	LOC_Os06g45310	A1-vs-A2	-	-	-
	osa-miR156e	LOC_Os06g50300	A1-vs-A2	GO:0044432//endoplasmic reticulum part;GO:0031410//cytoplasmic vesicle	GO:0005515//protein binding;GO:0032559//adenyl ribonucleotide binding	GO:0050896//response to stimulus;GO:0044267//cellular protein metabolic process
	osa-miR156e	LOC_Os07g42400	A1-vs-A2	GO:0043231//intracellular membrane-bounded organelle;GO:0043231//intracellular membrane-bounded organelle	GO:0046914//transition metal ion binding;GO:0003677//DNA binding;GO:0001071//nucleic acid binding transcription factor activity;GO:0046914//transition metal ion binding;GO:0003677//DNA binding;GO:0001071//nucleic acid binding transcription factor activity	GO:0006351//transcription, DNA-dependent;GO:0006351//transcription, DNA-dependent
	osa-miR156e	LOC_Os08g10550	A1-vs-A2	GO:0044464//cell part	GO:0046873//metal ion transmembrane transporter activity	GO:0030001//metal ion transport;GO:0034220//ion transmembrane transport
	osa-miR156e	LOC_Os09g32944	A1-vs-A2	-	-	-
	osa-miR156e	LOC_Os09g33820	A1-vs-A2	-	GO:0008374//O-acyltransferase activity;GO:0008374//O-acyltransferase activity;GO:0008374//O-acyltransferase activity	GO:0044238//primary metabolic process;GO:0044238//primary metabolic process;GO:0044238//primary metabolic process
	osa-miR156e	LOC_Os11g30370	A1-vs-A2	-	-	-
	osa-miR156f-5p	LOC_Os02g04680	A1-vs-A2	-	-	-
	osa-miR156f-5p	LOC_Os02g07780	A1-vs-A2	-	-	-
	osa-miR156f-5p	LOC_Os02g18810	A1-vs-A2	GO:0031410//cytoplasmic vesicle;GO:0043231//intracellular membrane-bounded organelle;GO:0043231//intracellular membrane-bounded organelle	-	-
	osa-miR156f-5p	LOC_Os02g34860	A1-vs-A2	GO:0044444//cytoplasmic part;GO:0043231//intracellular membrane-bounded organelle	GO:0005488//binding	GO:0009411//response to UV
	osa-miR156f-5p	LOC_Os03g03720	A1-vs-A2	GO:0009536//plastid;GO:0009536//plastid	GO:0000166//nucleotide binding;GO:0000166//nucleotide binding	GO:0015977//carbon fixation;GO:0006007//glucose catabolic process;GO:0015977//carbon fixation;GO:0006007//glucose catabolic process
	osa-miR156f-5p	LOC_Os04g01690	A1-vs-A2*	-	GO:0016831//carboxy-lyase activity;GO:0016831//carboxy-lyase activity;GO:0016831//carboxy-lyase activity	GO:0006525//arginine metabolic process;GO:0006596//polyamine biosynthetic process;GO:0006525//arginine metabolic process;GO:0006596//polyamine biosynthetic process;GO:0006525//arginine metabolic process;GO:0006596//polyamine biosynthetic process
	osa-miR156f-5p	LOC_Os04g25784	A1-vs-A2	-	-	-
	osa-miR156f-5p	LOC_Os05g05170	A1-vs-A2	-	-	-
	osa-miR156f-5p	LOC_Os06g34440	A1-vs-A2	-	-	-
	osa-miR156f-5p	LOC_Os06g45310	A1-vs-A2	-	-	-
	osa-miR156f-5p	LOC_Os06g50300	A1-vs-A2	GO:0044432//endoplasmic reticulum part;GO:0031410//cytoplasmic vesicle	GO:0005515//protein binding;GO:0032559//adenyl ribonucleotide binding	GO:0050896//response to stimulus;GO:0044267//cellular protein metabolic process
	osa-miR156f-5p	LOC_Os07g42400	A1-vs-A2	GO:0043231//intracellular membrane-bounded organelle;GO:0043231//intracellular membrane-bounded organelle	GO:0046914//transition metal ion binding;GO:0003677//DNA binding;GO:0001071//nucleic acid binding transcription factor activity;GO:0046914//transition metal ion binding;GO:0003677//DNA binding;GO:0001071//nucleic acid binding transcription factor activity	GO:0006351//transcription, DNA-dependent;GO:0006351//transcription, DNA-dependent
	osa-miR156f-5p	LOC_Os08g10550	A1-vs-A2	GO:0044464//cell part	GO:0046873//metal ion transmembrane transporter activity	GO:0030001//metal ion transport;GO:0034220//ion transmembrane transport
	osa-miR156f-5p	LOC_Os09g32944	A1-vs-A2	-	-	-
	osa-miR156f-5p	LOC_Os09g33820	A1-vs-A2	-	GO:0008374//O-acyltransferase activity;GO:0008374//O-acyltransferase activity;GO:0008374//O-acyltransferase activity	GO:0044238//primary metabolic process;GO:0044238//primary metabolic process;GO:0044238//primary metabolic process
	osa-miR156f-5p	LOC_Os11g30370	A1-vs-A2	-	-	-
	osa-miR156g-5p	LOC_Os02g04680	A1-vs-A2	-	-	-
	osa-miR156g-5p	LOC_Os02g07780	A1-vs-A2	-	-	-
	osa-miR156g-5p	LOC_Os02g18810	A1-vs-A2	GO:0031410//cytoplasmic vesicle;GO:0043231//intracellular membrane-bounded organelle;GO:0043231//intracellular membrane-bounded organelle	-	-
	osa-miR156g-5p	LOC_Os02g34860	A1-vs-A2	GO:0044444//cytoplasmic part;GO:0043231//intracellular membrane-bounded organelle	GO:0005488//binding	GO:0009411//response to UV
	osa-miR156g-5p	LOC_Os03g03720	A1-vs-A2	GO:0009536//plastid;GO:0009536//plastid	GO:0000166//nucleotide binding;GO:0000166//nucleotide binding	GO:0015977//carbon fixation;GO:0006007//glucose catabolic process;GO:0015977//carbon fixation;GO:0006007//glucose catabolic process
	osa-miR156g-5p	LOC_Os04g01690	A1-vs-A2*	-	GO:0016831//carboxy-lyase activity;GO:0016831//carboxy-lyase activity;GO:0016831//carboxy-lyase activity	GO:0006525//arginine metabolic process;GO:0006596//polyamine biosynthetic process;GO:0006525//arginine metabolic process;GO:0006596//polyamine biosynthetic process;GO:0006525//arginine metabolic process;GO:0006596//polyamine biosynthetic process
	osa-miR156g-5p	LOC_Os04g25784	A1-vs-A2	-	-	-
	osa-miR156g-5p	LOC_Os05g05170	A1-vs-A2	-	-	-
	osa-miR156g-5p	LOC_Os06g34440	A1-vs-A2	-	-	-
	osa-miR156g-5p	LOC_Os06g45310	A1-vs-A2	-	-	-
	osa-miR156g-5p	LOC_Os06g50300	A1-vs-A2	GO:0044432//endoplasmic reticulum part;GO:0031410//cytoplasmic vesicle	GO:0005515//protein binding;GO:0032559//adenyl ribonucleotide binding	GO:0050896//response to stimulus;GO:0044267//cellular protein metabolic process
	osa-miR156g-5p	LOC_Os07g42400	A1-vs-A2	GO:0043231//intracellular membrane-bounded organelle;GO:0043231//intracellular membrane-bounded organelle	GO:0046914//transition metal ion binding;GO:0003677//DNA binding;GO:0001071//nucleic acid binding transcription factor activity;GO:0046914//transition metal ion binding;GO:0003677//DNA binding;GO:0001071//nucleic acid binding transcription factor activity	GO:0006351//transcription, DNA-dependent;GO:0006351//transcription, DNA-dependent
	osa-miR156g-5p	LOC_Os08g10550	A1-vs-A2	GO:0044464//cell part	GO:0046873//metal ion transmembrane transporter activity	GO:0030001//metal ion transport;GO:0034220//ion transmembrane transport
	osa-miR156g-5p	LOC_Os09g32944	A1-vs-A2	-	-	-
	osa-miR156g-5p	LOC_Os09g33820	A1-vs-A2	-	GO:0008374//O-acyltransferase activity;GO:0008374//O-acyltransferase activity;GO:0008374//O-acyltransferase activity	GO:0044238//primary metabolic process;GO:0044238//primary metabolic process;GO:0044238//primary metabolic process
	osa-miR156g-5p	LOC_Os11g30370	A1-vs-A2	-	-	-
	osa-miR156h-5p	LOC_Os02g04680	A1-vs-A2	-	-	-
	osa-miR156h-5p	LOC_Os02g07780	A1-vs-A2	-	-	-
	osa-miR156h-5p	LOC_Os02g18810	A1-vs-A2	GO:0031410//cytoplasmic vesicle;GO:0043231//intracellular membrane-bounded organelle;GO:0043231//intracellular membrane-bounded organelle	-	-
	osa-miR156h-5p	LOC_Os02g34860	A1-vs-A2	GO:0044444//cytoplasmic part;GO:0043231//intracellular membrane-bounded organelle	GO:0005488//binding	GO:0009411//response to UV
	osa-miR156h-5p	LOC_Os03g03720	A1-vs-A2	GO:0009536//plastid;GO:0009536//plastid	GO:0000166//nucleotide binding;GO:0000166//nucleotide binding	GO:0015977//carbon fixation;GO:0006007//glucose catabolic process;GO:0015977//carbon fixation;GO:0006007//glucose catabolic process
	osa-miR156h-5p	LOC_Os04g01690	A1-vs-A2*	-	GO:0016831//carboxy-lyase activity;GO:0016831//carboxy-lyase activity;GO:0016831//carboxy-lyase activity	GO:0006525//arginine metabolic process;GO:0006596//polyamine biosynthetic process;GO:0006525//arginine metabolic process;GO:0006596//polyamine biosynthetic process;GO:0006525//arginine metabolic process;GO:0006596//polyamine biosynthetic process
	osa-miR156h-5p	LOC_Os04g25784	A1-vs-A2	-	-	-
	osa-miR156h-5p	LOC_Os05g05170	A1-vs-A2	-	-	-
	osa-miR156h-5p	LOC_Os06g34440	A1-vs-A2	-	-	-
	osa-miR156h-5p	LOC_Os06g45310	A1-vs-A2	-	-	-
	osa-miR156h-5p	LOC_Os06g50300	A1-vs-A2	GO:0044432//endoplasmic reticulum part;GO:0031410//cytoplasmic vesicle	GO:0005515//protein binding;GO:0032559//adenyl ribonucleotide binding	GO:0050896//response to stimulus;GO:0044267//cellular protein metabolic process
	osa-miR156h-5p	LOC_Os07g42400	A1-vs-A2	GO:0043231//intracellular membrane-bounded organelle;GO:0043231//intracellular membrane-bounded organelle	GO:0046914//transition metal ion binding;GO:0003677//DNA binding;GO:0001071//nucleic acid binding transcription factor activity;GO:0046914//transition metal ion binding;GO:0003677//DNA binding;GO:0001071//nucleic acid binding transcription factor activity	GO:0006351//transcription, DNA-dependent;GO:0006351//transcription, DNA-dependent
	osa-miR156h-5p	LOC_Os08g10550	A1-vs-A2	GO:0044464//cell part	GO:0046873//metal ion transmembrane transporter activity	GO:0030001//metal ion transport;GO:0034220//ion transmembrane transport
	osa-miR156h-5p	LOC_Os09g32944	A1-vs-A2	-	-	-
	osa-miR156h-5p	LOC_Os09g33820	A1-vs-A2	-	GO:0008374//O-acyltransferase activity;GO:0008374//O-acyltransferase activity;GO:0008374//O-acyltransferase activity	GO:0044238//primary metabolic process;GO:0044238//primary metabolic process;GO:0044238//primary metabolic process
	osa-miR156h-5p	LOC_Os11g30370	A1-vs-A2	-	-	-
	osa-miR156i	LOC_Os02g04680	A1-vs-A2	-	-	-
	osa-miR156i	LOC_Os02g07780	A1-vs-A2	-	-	-
	osa-miR156i	LOC_Os02g18810	A1-vs-A2	GO:0031410//cytoplasmic vesicle;GO:0043231//intracellular membrane-bounded organelle;GO:0043231//intracellular membrane-bounded organelle	-	-
	osa-miR156i	LOC_Os02g34860	A1-vs-A2	GO:0044444//cytoplasmic part;GO:0043231//intracellular membrane-bounded organelle	GO:0005488//binding	GO:0009411//response to UV
	osa-miR156i	LOC_Os03g03720	A1-vs-A2	GO:0009536//plastid;GO:0009536//plastid	GO:0000166//nucleotide binding;GO:0000166//nucleotide binding	GO:0015977//carbon fixation;GO:0006007//glucose catabolic process;GO:0015977//carbon fixation;GO:0006007//glucose catabolic process
	osa-miR156i	LOC_Os04g01690	A1-vs-A2*	-	GO:0016831//carboxy-lyase activity;GO:0016831//carboxy-lyase activity;GO:0016831//carboxy-lyase activity	GO:0006525//arginine metabolic process;GO:0006596//polyamine biosynthetic process;GO:0006525//arginine metabolic process;GO:0006596//polyamine biosynthetic process;GO:0006525//arginine metabolic process;GO:0006596//polyamine biosynthetic process
	osa-miR156i	LOC_Os04g25784	A1-vs-A2	-	-	-
	osa-miR156i	LOC_Os05g05170	A1-vs-A2	-	-	-
	osa-miR156i	LOC_Os06g34440	A1-vs-A2	-	-	-
	osa-miR156i	LOC_Os06g45310	A1-vs-A2	-	-	-
	osa-miR156i	LOC_Os06g50300	A1-vs-A2	GO:0044432//endoplasmic reticulum part;GO:0031410//cytoplasmic vesicle	GO:0005515//protein binding;GO:0032559//adenyl ribonucleotide binding	GO:0050896//response to stimulus;GO:0044267//cellular protein metabolic process
	osa-miR156i	LOC_Os07g42400	A1-vs-A2	GO:0043231//intracellular membrane-bounded organelle;GO:0043231//intracellular membrane-bounded organelle	GO:0046914//transition metal ion binding;GO:0003677//DNA binding;GO:0001071//nucleic acid binding transcription factor activity;GO:0046914//transition metal ion binding;GO:0003677//DNA binding;GO:0001071//nucleic acid binding transcription factor activity	GO:0006351//transcription, DNA-dependent;GO:0006351//transcription, DNA-dependent
	osa-miR156i	LOC_Os08g10550	A1-vs-A2	GO:0044464//cell part	GO:0046873//metal ion transmembrane transporter activity	GO:0030001//metal ion transport;GO:0034220//ion transmembrane transport
	osa-miR156i	LOC_Os09g32944	A1-vs-A2	-	-	-
	osa-miR156i	LOC_Os09g33820	A1-vs-A2	-	GO:0008374//O-acyltransferase activity;GO:0008374//O-acyltransferase activity;GO:0008374//O-acyltransferase activity	GO:0044238//primary metabolic process;GO:0044238//primary metabolic process;GO:0044238//primary metabolic process
	osa-miR156i	LOC_Os11g30370	A1-vs-A2	-	-	-
	osa-miR156j-5p	LOC_Os02g04680	A1-vs-A2	-	-	-
	osa-miR156j-5p	LOC_Os02g07780	A1-vs-A2	-	-	-
	osa-miR156j-5p	LOC_Os02g18810	A1-vs-A2	GO:0031410//cytoplasmic vesicle;GO:0043231//intracellular membrane-bounded organelle;GO:0043231//intracellular membrane-bounded organelle	-	-
	osa-miR156j-5p	LOC_Os02g34860	A1-vs-A2	GO:0044444//cytoplasmic part;GO:0043231//intracellular membrane-bounded organelle	GO:0005488//binding	GO:0009411//response to UV
	osa-miR156j-5p	LOC_Os03g03720	A1-vs-A2	GO:0009536//plastid;GO:0009536//plastid	GO:0000166//nucleotide binding;GO:0000166//nucleotide binding	GO:0015977//carbon fixation;GO:0006007//glucose catabolic process;GO:0015977//carbon fixation;GO:0006007//glucose catabolic process
	osa-miR156j-5p	LOC_Os04g01690	A1-vs-A2*	-	GO:0016831//carboxy-lyase activity;GO:0016831//carboxy-lyase activity;GO:0016831//carboxy-lyase activity	GO:0006525//arginine metabolic process;GO:0006596//polyamine biosynthetic process;GO:0006525//arginine metabolic process;GO:0006596//polyamine biosynthetic process;GO:0006525//arginine metabolic process;GO:0006596//polyamine biosynthetic process
	osa-miR156j-5p	LOC_Os04g25784	A1-vs-A2	-	-	-
	osa-miR156j-5p	LOC_Os05g05170	A1-vs-A2	-	-	-
	osa-miR156j-5p	LOC_Os06g34440	A1-vs-A2	-	-	-
	osa-miR156j-5p	LOC_Os06g45310	A1-vs-A2	-	-	-
	osa-miR156j-5p	LOC_Os06g50300	A1-vs-A2	GO:0044432//endoplasmic reticulum part;GO:0031410//cytoplasmic vesicle	GO:0005515//protein binding;GO:0032559//adenyl ribonucleotide binding	GO:0050896//response to stimulus;GO:0044267//cellular protein metabolic process
	osa-miR156j-5p	LOC_Os07g42400	A1-vs-A2	GO:0043231//intracellular membrane-bounded organelle;GO:0043231//intracellular membrane-bounded organelle	GO:0046914//transition metal ion binding;GO:0003677//DNA binding;GO:0001071//nucleic acid binding transcription factor activity;GO:0046914//transition metal ion binding;GO:0003677//DNA binding;GO:0001071//nucleic acid binding transcription factor activity	GO:0006351//transcription, DNA-dependent;GO:0006351//transcription, DNA-dependent
	osa-miR156j-5p	LOC_Os08g10550	A1-vs-A2	GO:0044464//cell part	GO:0046873//metal ion transmembrane transporter activity	GO:0030001//metal ion transport;GO:0034220//ion transmembrane transport
	osa-miR156j-5p	LOC_Os09g32944	A1-vs-A2	-	-	-
	osa-miR156j-5p	LOC_Os09g33820	A1-vs-A2	-	GO:0008374//O-acyltransferase activity;GO:0008374//O-acyltransferase activity;GO:0008374//O-acyltransferase activity	GO:0044238//primary metabolic process;GO:0044238//primary metabolic process;GO:0044238//primary metabolic process
	osa-miR156j-5p	LOC_Os11g30370	A1-vs-A2	-	-	-
	osa-miR156l-5p	LOC_Os02g07780	A1-vs-A2	-	-	-
	osa-miR159f	LOC_Os06g40570	A1-vs-A2	-	-	GO:0009555//pollen development;GO:0048017//inositol lipid-mediated signaling
	osa-miR160a-3p	LOC_Os03g02840	A1-vs-A2	-	-	-
	osa-miR160b-3p	LOC_Os03g02840	A1-vs-A2	-	-	-
	osa-miR164b	LOC_Os02g43300	A1-vs-A2	-	-	-
	osa-miR164f	LOC_Os02g43300	A1-vs-A2	-	-	-
	osa-miR166e-3p	LOC_Os02g34560	A1-vs-A2	-	-	-
	osa-miR168a-5p	LOC_Os02g03700	A1-vs-A2	-	-	-
	osa-miR168a-5p	LOC_Os02g47690	A1-vs-A2	-	GO:0004175//endopeptidase activity;GO:0003676//nucleic acid binding;GO:0034061//DNA polymerase activity	GO:0006260//DNA replication;GO:0019538//protein metabolic process
	osa-miR168a-5p	LOC_Os03g03260	A1-vs-A2	-	-	-
	osa-miR168a-5p	LOC_Os09g02700	A1-vs-A2	-	GO:0003676//nucleic acid binding	-
	osa-miR172a	LOC_Os03g43020	A1-vs-A2	GO:0043234//protein complex	GO:0005515//protein binding	GO:0044267//cellular protein metabolic process
	osa-miR172a	LOC_Os08g39630	A1-vs-A2	-	-	-
	osa-miR172d-3p	LOC_Os03g43020	A1-vs-A2	GO:0043234//protein complex	GO:0005515//protein binding	GO:0044267//cellular protein metabolic process
	osa-miR172d-3p	LOC_Os08g39630	A1-vs-A2	-	-	-
	osa-miR1846a-3p	LOC_Os01g10400	A1-vs-A2*	-	GO:0043169//cation binding	-
	osa-miR1846a-3p	LOC_Os01g50310	A1-vs-A2	-	-	-
	osa-miR1846a-3p	LOC_Os01g66590	A1-vs-A2	GO:0043231//intracellular membrane-bounded organelle;GO:0043231//intracellular membrane-bounded organelle;GO:0043231//intracellular membrane-bounded organelle	GO:0005488//binding;GO:0005488//binding;GO:0005488//binding	-
	osa-miR1846a-3p	LOC_Os02g25624	A1-vs-A2	GO:0043231//intracellular membrane-bounded organelle	-	-
	osa-miR1846a-3p	LOC_Os03g55010	A1-vs-A2	-	GO:0016757//transferase activity, transferring glycosyl groups	-
	osa-miR1846a-3p	LOC_Os03g55030	A1-vs-A2	-	GO:0016757//transferase activity, transferring glycosyl groups;GO:0016757//transferase activity, transferring glycosyl groups	-
	osa-miR1846a-3p	LOC_Os07g37820	A1-vs-A2	-	-	-
	osa-miR1846a-3p	LOC_Os09g27360	A1-vs-A2	-	-	-
	osa-miR1846a-3p	LOC_Os10g22450	A1-vs-A2	GO:0031224//intrinsic to membrane;GO:0044424//intracellular part	GO:0017111//nucleoside-triphosphatase activity;GO:0016872//intramolecular lyase activity;GO:0015405//P-P-bond-hydrolysis-driven transmembrane transporter activity;GO:0032559//adenyl ribonucleotide binding	GO:0006644//phospholipid metabolic process;GO:0006810//transport;GO:0006020//inositol metabolic process;GO:0009207//purine ribonucleoside triphosphate catabolic process
	osa-miR1846a-5p	LOC_Os01g14040	A1-vs-A2	GO:0044424//intracellular part	GO:0016787//hydrolase activity	GO:0009063//cellular amino acid catabolic process
	osa-miR1846a-5p	LOC_Os01g43390	A1-vs-A2	GO:0009532//plastid stroma;GO:0009532//plastid stroma	GO:0016831//carboxy-lyase activity;GO:0016831//carboxy-lyase activity	GO:0006778//porphyrin-containing compound metabolic process;GO:0010038//response to metal ion;GO:0006778//porphyrin-containing compound metabolic process;GO:0010038//response to metal ion
	osa-miR1846a-5p	LOC_Os02g25624	A1-vs-A2	GO:0043231//intracellular membrane-bounded organelle	-	-
	osa-miR1846a-5p	LOC_Os04g32460	A1-vs-A2	GO:0031090//organelle membrane;GO:0031090//organelle membrane	GO:0042562//hormone binding;GO:0043178//alcohol binding;GO:0042562//hormone binding;GO:0043178//alcohol binding	GO:0048437//floral organ development;GO:0009755//hormone-mediated signaling pathway;GO:0009555//pollen development;GO:0009607//response to biotic stimulus;GO:0048437//floral organ development;GO:0009755//hormone-mediated signaling pathway;GO:0009555//pollen development;GO:0009607//response to biotic stimulus
	osa-miR1846a-5p	LOC_Os04g33710	A1-vs-A2	-	-	-
	osa-miR1846a-5p	LOC_Os07g31290	A1-vs-A2	-	GO:0004672//protein kinase activity;GO:0000166//nucleotide binding	-
	osa-miR1846a-5p	LOC_Os08g08230	A1-vs-A2	-	-	-
	osa-miR1846a-5p	LOC_Os08g10350	A1-vs-A2	GO:0031224//intrinsic to membrane;GO:0031410//cytoplasmic vesicle	-	-
	osa-miR1846a-5p	LOC_Os09g27970	A1-vs-A2	GO:0043231//intracellular membrane-bounded organelle;GO:0043231//intracellular membrane-bounded organelle;GO:0043231//intracellular membrane-bounded organelle;GO:0043231//intracellular membrane-bounded organelle;GO:0043231//intracellular membrane-bounded organelle	-	-
	osa-miR1846a-5p	LOC_Os09g30490	A1-vs-A2	-	GO:0046872//metal ion binding	-
	osa-miR1846a-5p	LOC_Os09g32300	A1-vs-A2	-	-	-
	osa-miR1846a-5p	LOC_Os12g13290	A1-vs-A2	GO:0043231//intracellular membrane-bounded organelle	-	-
	osa-miR1846a-5p	LOC_Os12g27370	A1-vs-A2	-	-	-
	osa-miR1846b-5p	LOC_Os01g14040	A1-vs-A2	GO:0044424//intracellular part	GO:0016787//hydrolase activity	GO:0009063//cellular amino acid catabolic process
	osa-miR1846b-5p	LOC_Os01g43390	A1-vs-A2	GO:0009532//plastid stroma;GO:0009532//plastid stroma	GO:0016831//carboxy-lyase activity;GO:0016831//carboxy-lyase activity	GO:0006778//porphyrin-containing compound metabolic process;GO:0010038//response to metal ion;GO:0006778//porphyrin-containing compound metabolic process;GO:0010038//response to metal ion
	osa-miR1846b-5p	LOC_Os02g25624	A1-vs-A2	GO:0043231//intracellular membrane-bounded organelle	-	-
	osa-miR1846b-5p	LOC_Os04g32460	A1-vs-A2	GO:0031090//organelle membrane;GO:0031090//organelle membrane	GO:0042562//hormone binding;GO:0043178//alcohol binding;GO:0042562//hormone binding;GO:0043178//alcohol binding	GO:0048437//floral organ development;GO:0009755//hormone-mediated signaling pathway;GO:0009555//pollen development;GO:0009607//response to biotic stimulus;GO:0048437//floral organ development;GO:0009755//hormone-mediated signaling pathway;GO:0009555//pollen development;GO:0009607//response to biotic stimulus
	osa-miR1846b-5p	LOC_Os04g33710	A1-vs-A2	-	-	-
	osa-miR1846b-5p	LOC_Os07g31290	A1-vs-A2	-	GO:0004672//protein kinase activity;GO:0000166//nucleotide binding	-
	osa-miR1846b-5p	LOC_Os08g08230	A1-vs-A2	-	-	-
	osa-miR1846b-5p	LOC_Os08g10350	A1-vs-A2	GO:0031224//intrinsic to membrane;GO:0031410//cytoplasmic vesicle	-	-
	osa-miR1846b-5p	LOC_Os09g27970	A1-vs-A2	GO:0043231//intracellular membrane-bounded organelle;GO:0043231//intracellular membrane-bounded organelle;GO:0043231//intracellular membrane-bounded organelle;GO:0043231//intracellular membrane-bounded organelle;GO:0043231//intracellular membrane-bounded organelle	-	-
	osa-miR1846b-5p	LOC_Os09g30490	A1-vs-A2	-	GO:0046872//metal ion binding	-
	osa-miR1846b-5p	LOC_Os09g32300	A1-vs-A2	-	-	-
	osa-miR1846b-5p	LOC_Os12g13290	A1-vs-A2	GO:0043231//intracellular membrane-bounded organelle	-	-
	osa-miR1846b-5p	LOC_Os12g27370	A1-vs-A2	-	-	-
	osa-miR1847.1	LOC_Os01g12880	A1-vs-A2	-	-	-
	osa-miR1847.1	LOC_Os03g22810	A1-vs-A2	GO:0044424//intracellular part	GO:0003824//catalytic activity;GO:0016209//antioxidant activity;GO:0043169//cation binding	GO:0072593//reactive oxygen species metabolic process
	osa-miR1847.1	LOC_Os03g53900	A1-vs-A2	-	-	GO:0050896//response to stimulus;GO:0050896//response to stimulus;GO:0050896//response to stimulus
	osa-miR1847.1	LOC_Os03g62260	A1-vs-A2	-	GO:0004497//monooxygenase activity;GO:0050662//coenzyme binding	GO:0006743//ubiquinone metabolic process
	osa-miR1847.1	LOC_Os07g03050	A1-vs-A2	GO:0043231//intracellular membrane-bounded organelle	-	-
	osa-miR1847.1	LOC_Os11g33320	A1-vs-A2	-	-	-
	osa-miR2055	LOC_Os04g09350	A1-vs-A2	-	-	-
	osa-miR2055	LOC_Os09g01610	A1-vs-A2	-	-	-
	osa-miR2118b	LOC_Os06g50280	A1-vs-A2	-	-	-
	osa-miR2118n	LOC_Os06g50280	A1-vs-A2	-	-	-
	osa-miR2873b	LOC_Os08g32130	A1-vs-A2	GO:0009526//plastid envelope;GO:0009526//plastid envelope	GO:0003676//nucleic acid binding;GO:0001071//nucleic acid binding transcription factor activity;GO:0005515//protein binding;GO:0003676//nucleic acid binding;GO:0001071//nucleic acid binding transcription factor activity;GO:0005515//protein binding	GO:0048506//regulation of timing of meristematic phase transition;GO:0006355//regulation of transcription, DNA-dependent;GO:0048506//regulation of timing of meristematic phase transition;GO:0006355//regulation of transcription, DNA-dependent
	osa-miR396a-5p	LOC_Os01g08560	A1-vs-A2	GO:0016020//membrane;GO:0030312//external encapsulating structure;GO:0016020//membrane;GO:0030312//external encapsulating structure	GO:0032559//adenyl ribonucleotide binding;GO:0032559//adenyl ribonucleotide binding	GO:0050896//response to stimulus;GO:0050896//response to stimulus
	osa-miR396a-5p	LOC_Os01g52640	A1-vs-A2	GO:0043234//protein complex;GO:0044424//intracellular part	GO:0016491//oxidoreductase activity;GO:0016301//kinase activity;GO:0005515//protein binding;GO:0032559//adenyl ribonucleotide binding	GO:0006464//cellular protein modification process
	osa-miR396a-5p	LOC_Os08g30930	A1-vs-A2	-	-	-
	osa-miR396a-5p	LOC_Os08g41690	A1-vs-A2	GO:0043231//intracellular membrane-bounded organelle	-	-
	osa-miR396a-5p	LOC_Os09g27700	A1-vs-A2	-	-	-
	osa-miR396a-5p	LOC_Os12g29980	A1-vs-A2	-	-	-
	osa-miR396b-5p	LOC_Os01g08560	A1-vs-A2	GO:0016020//membrane;GO:0030312//external encapsulating structure;GO:0016020//membrane;GO:0030312//external encapsulating structure	GO:0032559//adenyl ribonucleotide binding;GO:0032559//adenyl ribonucleotide binding	GO:0050896//response to stimulus;GO:0050896//response to stimulus
	osa-miR396b-5p	LOC_Os01g52640	A1-vs-A2	GO:0043234//protein complex;GO:0044424//intracellular part	GO:0016491//oxidoreductase activity;GO:0016301//kinase activity;GO:0005515//protein binding;GO:0032559//adenyl ribonucleotide binding	GO:0006464//cellular protein modification process
	osa-miR396b-5p	LOC_Os08g30930	A1-vs-A2	-	-	-
	osa-miR396b-5p	LOC_Os08g41690	A1-vs-A2	GO:0043231//intracellular membrane-bounded organelle	-	-
	osa-miR396b-5p	LOC_Os09g27700	A1-vs-A2	-	-	-
	osa-miR396b-5p	LOC_Os12g29980	A1-vs-A2	-	-	-
	osa-miR396c-3p	LOC_Os09g27700	A1-vs-A2	-	-	-
	osa-miR396c-3p	LOC_Os11g28990	A1-vs-A2	GO:0044464//cell part	GO:0005099//Ras GTPase activator activity	GO:0032318//regulation of Ras GTPase activity
	osa-miR396c-5p	LOC_Os02g53690	A1-vs-A2	-	-	-
	osa-miR396c-5p	LOC_Os08g30930	A1-vs-A2	-	-	-
	osa-miR396c-5p	LOC_Os09g27700	A1-vs-A2	-	-	-
	osa-miR396c-5p	LOC_Os11g35030	A1-vs-A2	-	-	-
	osa-miR396c-5p	LOC_Os12g29980	A1-vs-A2	-	-	-
	osa-miR396e-5p	LOC_Os02g53690	A1-vs-A2	-	-	-
	osa-miR396e-5p	LOC_Os09g27700	A1-vs-A2	-	-	-
	osa-miR396e-5p	LOC_Os11g35030	A1-vs-A2	-	-	-
	osa-miR396e-5p	LOC_Os12g29980	A1-vs-A2	-	-	-
	osa-miR396f-5p	LOC_Os02g53690	A1-vs-A2	-	-	-
	osa-miR444b.1	LOC_Os02g53260	A1-vs-A2	-	GO:0016407//acetyltransferase activity	-
	osa-miR444b.1	LOC_Os03g32499	A1-vs-A2	-	-	-
	osa-miR444c.1	LOC_Os02g53260	A1-vs-A2	-	GO:0016407//acetyltransferase activity	-
	osa-miR444c.1	LOC_Os03g32499	A1-vs-A2	-	-	-
	osa-miR444d.3	LOC_Os11g31770	A1-vs-A2	-	-	-
	osa-miR444f	LOC_Os05g47560	A1-vs-A2	GO:0009536//plastid	GO:0004672//protein kinase activity;GO:0032559//adenyl ribonucleotide binding	GO:0006464//cellular protein modification process;GO:0010109//regulation of photosynthesis;GO:0048511//rhythmic process
	osa-miR444f	LOC_Os07g14514	A1-vs-A2	GO:0043231//intracellular membrane-bounded organelle;GO:0043231//intracellular membrane-bounded organelle;GO:0043231//intracellular membrane-bounded organelle;GO:0043231//intracellular membrane-bounded organelle;GO:0043231//intracellular membrane-bounded organelle;GO:0043231//intracellular membrane-bounded organelle	-	-
	osa-miR5161	LOC_Os01g57720	A1-vs-A2	GO:0043231//intracellular membrane-bounded organelle;GO:0043231//intracellular membrane-bounded organelle;GO:0043231//intracellular membrane-bounded organelle	-	-
	osa-miR5161	LOC_Os03g01570	A1-vs-A2	-	-	-
	osa-miR5161	LOC_Os06g35560	A1-vs-A2	GO:0031410//cytoplasmic vesicle	GO:0003824//catalytic activity	-
	osa-miR5161	LOC_Os08g02130	A1-vs-A2	-	GO:0003676//nucleic acid binding;GO:0003676//nucleic acid binding	-
	osa-miR5161	LOC_Os09g38540	A1-vs-A2	GO:0031410//cytoplasmic vesicle	GO:0046914//transition metal ion binding	-
	osa-miR5161	LOC_Os11g13930	A1-vs-A2	-	-	-
	osa-miR5490	LOC_Os01g06740	A1-vs-A2	-	-	-
	osa-miR5490	LOC_Os02g47690	A1-vs-A2	-	GO:0004175//endopeptidase activity;GO:0003676//nucleic acid binding;GO:0034061//DNA polymerase activity	GO:0006260//DNA replication;GO:0019538//protein metabolic process
	osa-miR5490	LOC_Os04g24100	A1-vs-A2	-	-	-
	osa-miR5490	LOC_Os04g59620	A1-vs-A2	-	GO:0003676//nucleic acid binding;GO:0003824//catalytic activity	-
	osa-miR5490	LOC_Os08g39174	A1-vs-A2	-	-	-
	osa-miR5499	LOC_Os09g26820	A1-vs-A2	-	-	-
	osa-miR5813	LOC_Os02g12660	A1-vs-A2	-	GO:0004672//protein kinase activity;GO:0032559//adenyl ribonucleotide binding	GO:0050896//response to stimulus;GO:0006464//cellular protein modification process
	osa-miR5813	LOC_Os03g58880	A1-vs-A2	GO:0031410//cytoplasmic vesicle;GO:0043231//intracellular membrane-bounded organelle	GO:0016491//oxidoreductase activity;GO:0005488//binding	-
	osa-miR5813	LOC_Os12g06820	A1-vs-A2	GO:0043231//intracellular membrane-bounded organelle	-	-
	osa-miR5818	LOC_Os01g73880	A1-vs-A2	GO:0044424//intracellular part	GO:0008135//translation factor activity, nucleic acid binding	GO:0006412//translation
	osa-miR5821	LOC_Os01g67520	A1-vs-A2	-	-	-
	osa-miR5821	LOC_Os02g54910	A1-vs-A2	-	-	-
	osa-miR5821	LOC_Os03g25950	A1-vs-A2	GO:0043231//intracellular membrane-bounded organelle	-	-
	osa-miR5821	LOC_Os06g28670	A1-vs-A2	-	-	-
	osa-miR5821	LOC_Os07g37385	A1-vs-A2	GO:0043231//intracellular membrane-bounded organelle;GO:0044444//cytoplasmic part	-	-
	osa-miR5821	LOC_Os09g18320	A1-vs-A2	-	-	-
	osa-miR5821	LOC_Os12g39520	A1-vs-A2	-	-	-
	osa-miR5821	LOC_Os12g39810	A1-vs-A2	-	-	-
	osa-miR1425-5p	LOC_Os01g61190	A1-vs-A2, A1-vs-A3	GO:0043234//protein complex;GO:0043231//intracellular membrane-bounded organelle	-	GO:0016192//vesicle-mediated transport
	osa-miR1425-5p	LOC_Os08g01650	A1-vs-A2, A1-vs-A3	-	-	-
	osa-miR1432-5p	LOC_Os01g44950	A1-vs-A2, A1-vs-A3	-	-	-
	osa-miR1440b	LOC_Os04g38630	A1-vs-A2, A1-vs-A3	GO:0043231//intracellular membrane-bounded organelle	GO:0017111//nucleoside-triphosphatase activity;GO:0032559//adenyl ribonucleotide binding	-
	osa-miR1440b	LOC_Os05g37160	A1-vs-A2, A1-vs-A3	GO:0032991//macromolecular complex;GO:0043231//intracellular membrane-bounded organelle;GO:0015630//microtubule cytoskeleton	GO:0017111//nucleoside-triphosphatase activity;GO:0032561//guanyl ribonucleotide binding	GO:0043623//cellular protein complex assembly;GO:0009207//purine ribonucleoside triphosphate catabolic process
	osa-miR1440b	LOC_Os07g27450	A1-vs-A2, A1-vs-A3	GO:0031410//cytoplasmic vesicle	-	-
	osa-miR159f	LOC_Os02g40200	A1-vs-A2, A1-vs-A3	GO:0043231//intracellular membrane-bounded organelle;GO:0031410//cytoplasmic vesicle	-	-
	osa-miR159f	LOC_Os09g36650	A1-vs-A2, A1-vs-A3	GO:0043231//intracellular membrane-bounded organelle	-	-
	osa-miR160a-3p	LOC_Os04g04254	A1-vs-A2, A1-vs-A3	-	GO:0035251//UDP-glucosyltransferase activity;GO:0035251//UDP-glucosyltransferase activity	GO:0030258//lipid modification;GO:0030258//lipid modification
	osa-miR160a-3p	LOC_Os04g37470	A1-vs-A2, A1-vs-A3	GO:0043231//intracellular membrane-bounded organelle	GO:0003824//catalytic activity	GO:0008152//metabolic process
	osa-miR160a-3p	LOC_Os07g05024	A1-vs-A2, A1-vs-A3	-	-	-
	osa-miR160a-3p	LOC_Os12g03440	A1-vs-A2, A1-vs-A3	-	-	-
	osa-miR160b-3p	LOC_Os04g04254	A1-vs-A2, A1-vs-A3	-	GO:0035251//UDP-glucosyltransferase activity;GO:0035251//UDP-glucosyltransferase activity	GO:0030258//lipid modification;GO:0030258//lipid modification
	osa-miR160b-3p	LOC_Os04g37470	A1-vs-A2, A1-vs-A3	GO:0043231//intracellular membrane-bounded organelle	GO:0003824//catalytic activity	GO:0008152//metabolic process
	osa-miR160b-3p	LOC_Os07g05024	A1-vs-A2, A1-vs-A3	-	-	-
	osa-miR160b-3p	LOC_Os12g03440	A1-vs-A2, A1-vs-A3	-	-	-
	osa-miR160d-3p	LOC_Os07g05024	A1-vs-A2, A1-vs-A3	-	-	-
	osa-miR164a	LOC_Os02g43300	A1-vs-A2	-	-	-
	osa-miR166e-3p	LOC_Os09g24850	A1-vs-A2, A1-vs-A3	-	GO:0003676//nucleic acid binding;GO:0034061//DNA polymerase activity	GO:0006260//DNA replication
	osa-miR167a-3p	LOC_Os10g25780	A1-vs-A2, A1-vs-A3	-	GO:0050662//coenzyme binding;GO:0003824//catalytic activity;GO:0050662//coenzyme binding;GO:0003824//catalytic activity;GO:0050662//coenzyme binding;GO:0003824//catalytic activity	-
	osa-miR1846e	LOC_Os09g21802	A1-vs-A2, A1-vs-A3	-	-	-
	osa-miR1846e	LOC_Os11g07910	A1-vs-A2, A1-vs-A3	GO:0031224//intrinsic to membrane;GO:0031410//cytoplasmic vesicle	-	-
	osa-miR1849	LOC_Os07g17260	A1-vs-A2*, A1-vs-A3	GO:0043231//intracellular membrane-bounded organelle;GO:0043231//intracellular membrane-bounded organelle	GO:0003676//nucleic acid binding;GO:0005402//cation:sugar symporter activity;GO:0003676//nucleic acid binding;GO:0005402//cation:sugar symporter activity	GO:0006259//DNA metabolic process;GO:0008643//carbohydrate transport;GO:0006259//DNA metabolic process;GO:0008643//carbohydrate transport
	osa-miR1860-5p	LOC_Os01g01030	A1-vs-A2, A1-vs-A3	GO:0043231//intracellular membrane-bounded organelle	GO:0046914//transition metal ion binding;GO:0016682//oxidoreductase activity, acting on diphenols and related substances as donors, oxygen as acceptor	GO:0008152//metabolic process
	osa-miR1860-5p	LOC_Os01g73910	A1-vs-A2, A1-vs-A3	GO:0009536//plastid;GO:0009536//plastid;GO:0009536//plastid;GO:0009536//plastid;GO:0009536//plastid;GO:0009536//plastid	GO:0004175//endopeptidase activity;GO:0004175//endopeptidase activity;GO:0004175//endopeptidase activity;GO:0004175//endopeptidase activity;GO:0004175//endopeptidase activity;GO:0004175//endopeptidase activity	GO:0019538//protein metabolic process;GO:0019538//protein metabolic process;GO:0019538//protein metabolic process;GO:0019538//protein metabolic process;GO:0019538//protein metabolic process;GO:0019538//protein metabolic process
	osa-miR1860-5p	LOC_Os03g63360	A1-vs-A2, A1-vs-A3	GO:0009536//plastid	-	-
	osa-miR1860-5p	LOC_Os06g41910	A1-vs-A2, A1-vs-A3	-	-	-
	osa-miR1860-5p	LOC_Os09g37570	A1-vs-A2, A1-vs-A3	-	-	-
	osa-miR2055	LOC_Os01g62650	A1-vs-A2, A1-vs-A3*	-	GO:0003676//nucleic acid binding;GO:0003676//nucleic acid binding	-
	osa-miR2055	LOC_Os01g65080	A1-vs-A2, A1-vs-A3*	GO:0043231//intracellular membrane-bounded organelle;GO:0043231//intracellular membrane-bounded organelle;GO:0043231//intracellular membrane-bounded organelle;GO:0043231//intracellular membrane-bounded organelle	GO:0046914//transition metal ion binding;GO:0046914//transition metal ion binding;GO:0046914//transition metal ion binding;GO:0046914//transition metal ion binding	GO:0006351//transcription, DNA-dependent;GO:0009268//response to pH;GO:0010038//response to metal ion;GO:0006351//transcription, DNA-dependent;GO:0009268//response to pH;GO:0010038//response to metal ion;GO:0006351//transcription, DNA-dependent;GO:0009268//response to pH;GO:0010038//response to metal ion;GO:0006351//transcription, DNA-dependent;GO:0009268//response to pH;GO:0010038//response to m…
	osa-miR2055	LOC_Os02g48130	A1-vs-A2, A1-vs-A3	GO:0009536//plastid	-	-
	osa-miR2055	LOC_Os04g53720	A1-vs-A2, A1-vs-A3	-	GO:0046872//metal ion binding;GO:0003676//nucleic acid binding;GO:0003824//catalytic activity	-
	osa-miR2055	LOC_Os10g41560	A1-vs-A2, A1-vs-A3	GO:0043231//intracellular membrane-bounded organelle	-	-
	osa-miR319b	LOC_Os01g25610	A1-vs-A2, A1-vs-A3	GO:0030529//ribonucleoprotein complex	GO:0003676//nucleic acid binding;GO:0005198//structural molecule activity	GO:0010467//gene expression
	osa-miR396c-5p	LOC_Os01g08560	A1-vs-A2, A1-vs-A3	GO:0016020//membrane;GO:0030312//external encapsulating structure;GO:0016020//membrane;GO:0030312//external encapsulating structure	GO:0032559//adenyl ribonucleotide binding;GO:0032559//adenyl ribonucleotide binding	GO:0050896//response to stimulus;GO:0050896//response to stimulus
	osa-miR444b.1	LOC_Os02g49840	A1-vs-A2, A1-vs-A3	GO:0043231//intracellular membrane-bounded organelle	GO:0016491//oxidoreductase activity;GO:0003677//DNA binding;GO:0016491//oxidoreductase activity;GO:0003677//DNA binding;GO:0016491//oxidoreductase activity;GO:0003677//DNA binding;GO:0003677//DNA binding;GO:0001071//nucleic acid binding transcription factor activity	GO:0006351//transcription, DNA-dependent;GO:0006351//transcription, DNA-dependent;GO:0006351//transcription, DNA-dependent;GO:0006351//transcription, DNA-dependent
	osa-miR444b.1	LOC_Os04g38780	A1-vs-A2, A1-vs-A3	-	GO:0003677//DNA binding	GO:0006351//transcription, DNA-dependent
	osa-miR444b.1	LOC_Os08g33479	A1-vs-A2, A1-vs-A3	-	-	-
	osa-miR444b.1	LOC_Os09g24200	A1-vs-A2, A1-vs-A3	GO:0043231//intracellular membrane-bounded organelle;GO:0043231//intracellular membrane-bounded organelle	GO:0003677//DNA binding;GO:0003677//DNA binding	GO:0006511//ubiquitin-dependent protein catabolic process;GO:0006281//DNA repair;GO:0006511//ubiquitin-dependent protein catabolic process;GO:0006281//DNA repair
	osa-miR444c.1	LOC_Os02g49840	A1-vs-A2, A1-vs-A3	GO:0043231//intracellular membrane-bounded organelle	GO:0016491//oxidoreductase activity;GO:0003677//DNA binding;GO:0016491//oxidoreductase activity;GO:0003677//DNA binding;GO:0016491//oxidoreductase activity;GO:0003677//DNA binding;GO:0003677//DNA binding;GO:0001071//nucleic acid binding transcription factor activity	GO:0006351//transcription, DNA-dependent;GO:0006351//transcription, DNA-dependent;GO:0006351//transcription, DNA-dependent;GO:0006351//transcription, DNA-dependent
	osa-miR444c.1	LOC_Os04g38780	A1-vs-A2, A1-vs-A3	-	GO:0003677//DNA binding	GO:0006351//transcription, DNA-dependent
	osa-miR444c.1	LOC_Os08g33479	A1-vs-A2, A1-vs-A3	-	-	-
	osa-miR444c.1	LOC_Os09g24200	A1-vs-A2, A1-vs-A3	GO:0043231//intracellular membrane-bounded organelle;GO:0043231//intracellular membrane-bounded organelle	GO:0003677//DNA binding;GO:0003677//DNA binding	GO:0006511//ubiquitin-dependent protein catabolic process;GO:0006281//DNA repair;GO:0006511//ubiquitin-dependent protein catabolic process;GO:0006281//DNA repair
	osa-miR5161	LOC_Os05g47560	A1-vs-A2, A1-vs-A3	GO:0009536//plastid	GO:0004672//protein kinase activity;GO:0032559//adenyl ribonucleotide binding	GO:0006464//cellular protein modification process;GO:0010109//regulation of photosynthesis;GO:0048511//rhythmic process
	osa-miR531b	LOC_Os01g53130	A1-vs-A2, A1-vs-A3	-	GO:0046914//transition metal ion binding	-
	osa-miR531b	LOC_Os01g57410	A1-vs-A2, A1-vs-A3	-	-	-
	osa-miR531b	LOC_Os01g63354	A1-vs-A2, A1-vs-A3	-	-	-
	osa-miR531b	LOC_Os02g44610	A1-vs-A2, A1-vs-A3	-	-	-
	osa-miR531b	LOC_Os03g63310	A1-vs-A2, A1-vs-A3	GO:0016020//membrane	GO:0046872//metal ion binding;GO:0016491//oxidoreductase activity	-
	osa-miR531b	LOC_Os05g03030	A1-vs-A2, A1-vs-A3	GO:0030529//ribonucleoprotein complex;GO:0009536//plastid	GO:0003723//RNA binding	GO:0022613//ribonucleoprotein complex biogenesis
	osa-miR531b	LOC_Os06g03610	A1-vs-A2, A1-vs-A3*	-	GO:0004672//protein kinase activity;GO:0032559//adenyl ribonucleotide binding	GO:0006464//cellular protein modification process
	osa-miR531b	LOC_Os06g51430	A1-vs-A2, A1-vs-A3	GO:0031224//intrinsic to membrane;GO:0031410//cytoplasmic vesicle	GO:0004175//endopeptidase activity	-
	osa-miR531b	LOC_Os07g02100	A1-vs-A2, A1-vs-A3*	-	GO:0004497//monooxygenase activity;GO:0050662//coenzyme binding;GO:0004497//monooxygenase activity;GO:0050662//coenzyme binding	-
	osa-miR531b	LOC_Os11g14900	A1-vs-A2, A1-vs-A3*	GO:0031410//cytoplasmic vesicle;GO:0005783//endoplasmic reticulum;GO:0031410//cytoplasmic vesicle;GO:0005783//endoplasmic reticulum;GO:0031410//cytoplasmic vesicle;GO:0005783//endoplasmic reticulum;GO:0031410//cytoplasmic vesicle;GO:0005783//endoplasmic reticulum;GO:0031410//cytoplasmic vesicle;GO:0005783//endoplasmic reticulum	GO:0004175//endopeptidase activity;GO:0016491//oxidoreductase activity;GO:0004175//endopeptidase activity;GO:0016491//oxidoreductase activity;GO:0004175//endopeptidase activity;GO:0016491//oxidoreductase activity;GO:0004175//endopeptidase activity;GO:0016491//oxidoreductase activity;GO:0004175//endopeptidase activity;GO:0016491//oxidoreductase activity	GO:0019538//protein metabolic process;GO:0019538//protein metabolic process;GO:0019538//protein metabolic process;GO:0019538//protein metabolic process;GO:0019538//protein metabolic process
	osa-miR5791	LOC_Os07g32600	A1-vs-A2, A1-vs-A3	GO:0031410//cytoplasmic vesicle;GO:0031410//cytoplasmic vesicle	GO:0016798//hydrolase activity, acting on glycosyl bonds;GO:0043167//ion binding;GO:0016798//hydrolase activity, acting on glycosyl bonds;GO:0043167//ion binding	GO:0044238//primary metabolic process;GO:0044238//primary metabolic process
	osa-miR164a	LOC_Os05g51110	A1-vs-A2, A1-vs-B1	-	-	GO:0009725//response to hormone stimulus;GO:0006355//regulation of transcription, DNA-dependent
	osa-miR167a-3p	LOC_Os03g58260#	A1-vs-A2, A1-vs-A3, A1-vs-B1	GO:0043231//intracellular membrane-bounded organelle;GO:0043231//intracellular membrane-bounded organelle	GO:0016836//hydro-lyase activity;GO:0016836//hydro-lyase activity	GO:0006568//tryptophan metabolic process;GO:0006568//tryptophan metabolic process
	osa-miR167a-3p	LOC_Os10g03230#	A1-vs-A2, A1-vs-A3, A1-vs-B1	-	-	-
	osa-miR167a-3p	LOC_Os12g08000	A1-vs-A2, A1-vs-A3, A1-vs-B1	-	-	-
	osa-miR1846e	LOC_Os07g13930	A1-vs-A2, A1-vs-A3, A1-vs-B1	-	-	-
	osa-miR1846e	LOC_Os01g03830	A1-vs-A2, A1-vs-A3, A1-vs-B1, A3-vs-B3	-	-	-
	osa-miR1846e	LOC_Os01g54980	A1-vs-A2, A1-vs-A3, A1-vs-B1, A3-vs-B3	-	-	-
	osa-miR1846e	LOC_Os02g01490	A1-vs-A2, A1-vs-A3, A1-vs-B1, A3-vs-B3	-	-	-
	osa-miR1846e	LOC_Os04g58200	A1-vs-A2, A1-vs-A3*, A1-vs-B1, A3-vs-B3	GO:0009536//plastid;GO:0009536//plastid;GO:0009536//plastid	GO:0016491//oxidoreductase activity;GO:0016628//oxidoreductase activity, acting on the CH-CH group of donors, NAD or NADP as acceptor;GO:0016628//oxidoreductase activity, acting on the CH-CH group of donors, NAD or NADP as acceptor	GO:0044237//cellular metabolic process;GO:0006779//porphyrin-containing compound biosynthetic process;GO:0006779//porphyrin-containing compound biosynthetic process
	osa-miR1846e	LOC_Os06g37430	A1-vs-A2, A1-vs-A3, A1-vs-B1, A3-vs-B3	GO:0043231//intracellular membrane-bounded organelle;GO:0043231//intracellular membrane-bounded organelle	-	-
	osa-miR5490	LOC_Os10g08560	A1-vs-A2, A1-vs-A3, A1-vs-B1, A3-vs-B3	-	-	-
	osa-miR531b	LOC_Os01g62290	A1-vs-A2*, A1-vs-A3*, A2-vs-B2*	-	GO:0016628//oxidoreductase activity, acting on the CH-CH group of donors, NAD or NADP as acceptor;GO:0032559//adenyl ribonucleotide binding;GO:0016628//oxidoreductase activity, acting on the CH-CH group of donors, NAD or NADP as acceptor;GO:0032559//adenyl ribonucleotide binding	GO:0008152//metabolic process;GO:0050896//response to stimulus;GO:0008152//metabolic process;GO:0050896//response to stimulus
	osa-miR531b	LOC_Os03g62740	A1-vs-A2, A1-vs-A3, A2-vs-B2	GO:0031410//cytoplasmic vesicle	GO:0016787//hydrolase activity	-
	osa-miR531b	LOC_Os04g34620	A1-vs-A2, A1-vs-A3, A2-vs-B2	GO:0044464//cell part	-	-
	osa-miR531b	LOC_Os06g23504	A1-vs-A2, A1-vs-A3, A2-vs-B2	-	-	-
	osa-miR531b	LOC_Os06g46690	A1-vs-A2, A1-vs-A3, A2-vs-B2	GO:0031410//cytoplasmic vesicle	-	-
	osa-miR394	LOC_Os08g41320	A1-vs-A2, A1-vs-A3, A2-vs-B2, A3-vs-B3	GO:0043231//intracellular membrane-bounded organelle	-	-
	osa-miR1846e	LOC_Os01g14040	A1-vs-A2, A1-vs-A3, A3-vs-B3	GO:0044424//intracellular part	GO:0016787//hydrolase activity	GO:0009063//cellular amino acid catabolic process
	osa-miR1846e	LOC_Os09g27970	A1-vs-A2, A1-vs-A3, A3-vs-B3	GO:0043231//intracellular membrane-bounded organelle;GO:0043231//intracellular membrane-bounded organelle;GO:0043231//intracellular membrane-bounded organelle;GO:0043231//intracellular membrane-bounded organelle;GO:0043231//intracellular membrane-bounded organelle	-	-
	osa-miR1846e	LOC_Os12g13290	A1-vs-A2, A1-vs-A3, A3-vs-B3	GO:0043231//intracellular membrane-bounded organelle	-	-
	osa-miR6253	LOC_Os03g50110	A1-vs-A2, A1-vs-A3, A3-vs-B3	-	-	-
	osa-miR396c-5p	LOC_Os06g10310	A1-vs-A2, A1-vs-A3, B1-vs-B2	GO:0044464//cell part	-	-
	osa-miR396e-5p	LOC_Os06g10310	A1-vs-A2, A1-vs-A3, B1-vs-B2	GO:0044464//cell part	-	-
	osa-miR396f-5p	LOC_Os06g10310	A1-vs-A2, A1-vs-A3, B1-vs-B2	GO:0044464//cell part	-	-
	osa-miR5083	LOC_Os02g06140	A1-vs-A2, A1-vs-A3, B1-vs-B2	GO:0043231//intracellular membrane-bounded organelle	GO:0003676//nucleic acid binding	GO:0006259//DNA metabolic process
	osa-miR5083	LOC_Os03g60530	A1-vs-A2, A1-vs-A3, B1-vs-B2	-	GO:0032561//guanyl ribonucleotide binding;GO:0032561//guanyl ribonucleotide binding;GO:0003824//catalytic activity	GO:0006810//transport;GO:0035556//intracellular signal transduction;GO:0006810//transport;GO:0035556//intracellular signal transduction
	osa-miR5083	LOC_Os10g37170	A1-vs-A2, A1-vs-A3, B1-vs-B2	-	-	-
	osa-miR5083	LOC_Os11g12240	A1-vs-A2, A1-vs-A3, B1-vs-B2	-	GO:0032559//adenyl ribonucleotide binding	GO:0012501//programmed cell death;GO:0006950//response to stress
	osa-miR5083	LOC_Os12g06340	A1-vs-A2, A1-vs-A3, B1-vs-B2	-	-	-
	osa-miR5083	LOC_Os12g38640	A1-vs-A2, A1-vs-A3, B1-vs-B2	GO:0009579//thylakoid;GO:0009507//chloroplast	-	-
	osa-miR156l-5p	LOC_Os06g50300	A1-vs-A2, A1-vs-A3, B1-vs-B2, A1-vs-B1	GO:0044432//endoplasmic reticulum part;GO:0031410//cytoplasmic vesicle	GO:0005515//protein binding;GO:0032559//adenyl ribonucleotide binding	GO:0050896//response to stimulus;GO:0044267//cellular protein metabolic process
	osa-miR5806	LOC_Os03g59640	A1-vs-A2, A1-vs-A3, B1-vs-B2, A1-vs-B1	GO:0043234//protein complex;GO:0009532//plastid stroma	GO:0051003//ligase activity, forming nitrogen-metal bonds, forming coordination complexes;GO:0016462//pyrophosphatase activity;GO:0032559//adenyl ribonucleotide binding	GO:0006779//porphyrin-containing compound biosynthetic process
	osa-miR5486	LOC_Os06g24594	A1-vs-A2, A1-vs-A3, B1-vs-B2, A2-vs-B2	GO:0005622//intracellular	GO:0004518//nuclease activity;GO:0005488//binding;GO:0004518//nuclease activity;GO:0005488//binding;GO:0005488//binding;GO:0004518//nuclease activity	-
	osa-miR5497	LOC_Os02g27000	A1-vs-A2, A1-vs-A3, B1-vs-B2, A3-vs-B3	-	-	-
	osa-miR1432-5p	LOC_Os04g35590	A1-vs-A2, A1-vs-A3, B1-vs-B2, B1-vs-B3	-	-	-
	osa-miR1432-5p	LOC_Os05g06360	A1-vs-A2, A1-vs-A3, B1-vs-B2, B1-vs-B3	GO:0044464//cell part	-	-
	osa-miR1432-5p	LOC_Os11g07124	A1-vs-A2, A1-vs-A3, B1-vs-B2, B1-vs-B3	-	-	-
	osa-miR156l-5p	LOC_Os02g04450	A1-vs-A2, A1-vs-A3, B1-vs-B2, B1-vs-B3	-	-	-
	osa-miR156l-5p	LOC_Os06g50400	A1-vs-A2, A1-vs-A3, B1-vs-B2, B1-vs-B3*	GO:0031410//cytoplasmic vesicle	-	-
	osa-miR159a.2	LOC_Os03g28310	A1-vs-A2, A1-vs-A3, B1-vs-B2, B1-vs-B3	-	-	-
	osa-miR159f	LOC_Os03g38210	A1-vs-A2, A1-vs-A3*, B1-vs-B2*, B1-vs-B3*	GO:0043231//intracellular membrane-bounded organelle	GO:0003676//nucleic acid binding	-
	osa-miR159f	LOC_Os05g49164	A1-vs-A2, A1-vs-A3, B1-vs-B2, B1-vs-B3	-	-	-
	osa-miR159f	LOC_Os10g05230	A1-vs-A2, A1-vs-A3, B1-vs-B2, B1-vs-B3	-	GO:0046872//metal ion binding;GO:0046872//metal ion binding;GO:0046872//metal ion binding	-
	osa-miR159f	LOC_Os12g10740	A1-vs-A2, A1-vs-A3, B1-vs-B2, B1-vs-B3	GO:0031410//cytoplasmic vesicle	GO:0004672//protein kinase activity;GO:0000166//nucleotide binding	GO:0008152//metabolic process
	osa-miR164a	LOC_Os05g38810	A1-vs-A2, B1-vs-B2, B1-vs-B3	-	-	-
	osa-miR164b	LOC_Os08g10080	A1-vs-A2, A1-vs-A3, B1-vs-B2, B1-vs-B3	-	-	-
	osa-miR164f	LOC_Os08g10080	A1-vs-A2, A1-vs-A3, B1-vs-B2, B1-vs-B3	-	-	-
	osa-miR168a-5p	LOC_Os10g08022	A1-vs-A2, A1-vs-A3*, B1-vs-B2, B1-vs-B3	GO:0044424//intracellular part	GO:0016832//aldehyde-lyase activity	GO:0006007//glucose catabolic process
	osa-miR172a	LOC_Os01g56680	A1-vs-A2, A1-vs-A3, B1-vs-B2, B1-vs-B3	GO:0043231//intracellular membrane-bounded organelle;GO:0043231//intracellular membrane-bounded organelle	-	-
	osa-miR172a	LOC_Os11g14050	A1-vs-A2*, A1-vs-A3, B1-vs-B2, B1-vs-B3	GO:0031410//cytoplasmic vesicle;GO:0031410//cytoplasmic vesicle	GO:0004672//protein kinase activity;GO:0000166//nucleotide binding;GO:0004672//protein kinase activity;GO:0000166//nucleotide binding	GO:0008152//metabolic process;GO:0008152//metabolic process
	osa-miR172d-3p	LOC_Os01g56680	A1-vs-A2, A1-vs-A3, B1-vs-B2, B1-vs-B3	GO:0043231//intracellular membrane-bounded organelle;GO:0043231//intracellular membrane-bounded organelle	-	-
	osa-miR172d-3p	LOC_Os11g14050	A1-vs-A2, A1-vs-A3, B1-vs-B2, B1-vs-B3	GO:0031410//cytoplasmic vesicle;GO:0031410//cytoplasmic vesicle	GO:0004672//protein kinase activity;GO:0000166//nucleotide binding;GO:0004672//protein kinase activity;GO:0000166//nucleotide binding	GO:0008152//metabolic process;GO:0008152//metabolic process
	osa-miR319a-3p	LOC_Os08g45160	A1-vs-A2, A1-vs-A3, B1-vs-B2, B1-vs-B3	GO:0043231//intracellular membrane-bounded organelle	-	-
	osa-miR396c-3p	LOC_Os01g55280	A1-vs-A2, A1-vs-A3, B1-vs-B2, B1-vs-B3	-	-	-
	osa-miR396c-3p	LOC_Os03g30300	A1-vs-A2*, A1-vs-A3*, B1-vs-B2*, B1-vs-B3*	-	GO:0004091//carboxylesterase activity;GO:0004091//carboxylesterase activity	GO:0006007//glucose catabolic process;GO:0006007//glucose catabolic process
	osa-miR396c-3p	LOC_Os03g52630	A1-vs-A2, A1-vs-A3, B1-vs-B2, B1-vs-B3*	-	GO:0016798//hydrolase activity, acting on glycosyl bonds;GO:0016798//hydrolase activity, acting on glycosyl bonds	GO:0044238//primary metabolic process;GO:0044238//primary metabolic process
	osa-miR396c-3p	LOC_Os08g33479	A1-vs-A2, A1-vs-A3, B1-vs-B2, B1-vs-B3	-	-	-
	osa-miR396c-3p	LOC_Os09g19710	A1-vs-A2, A1-vs-A3*, B1-vs-B2, B1-vs-B3	GO:0044464//cell part	-	-
	osa-miR396c-5p	LOC_Os01g53610	A1-vs-A2, A1-vs-A3, B1-vs-B2, B1-vs-B3	GO:0043231//intracellular membrane-bounded organelle	-	-
	osa-miR396c-5p	LOC_Os02g18640	A1-vs-A2, A1-vs-A3, B1-vs-B2, B1-vs-B3*	-	-	-
	osa-miR396c-5p	LOC_Os04g52040	A1-vs-A2, A1-vs-A3, B1-vs-B2, B1-vs-B3	-	-	-
	osa-miR396c-5p	LOC_Os06g02560	A1-vs-A2, A1-vs-A3, B1-vs-B2, B1-vs-B3	-	-	-
	osa-miR396c-5p	LOC_Os06g04600	A1-vs-A2, A1-vs-A3, B1-vs-B2, B1-vs-B3	-	GO:0016876//ligase activity, forming aminoacyl-tRNA and related compounds;GO:0032559//adenyl ribonucleotide binding;GO:0016876//ligase activity, forming aminoacyl-tRNA and related compounds;GO:0032559//adenyl ribonucleotide binding	GO:0010467//gene expression;GO:0010467//gene expression
	osa-miR396c-5p	LOC_Os07g46370	A1-vs-A2, A1-vs-A3, B1-vs-B2, B1-vs-B3	-	-	-
	osa-miR396c-5p	LOC_Os11g45410	A1-vs-A2, A1-vs-A3, B1-vs-B2, B1-vs-B3	-	-	-
	osa-miR396c-5p	LOC_Os12g10180	A1-vs-A2, A1-vs-A3, B1-vs-B2, B1-vs-B3	GO:0031410//cytoplasmic vesicle	-	-
	osa-miR396e-5p	LOC_Os01g64280	A1-vs-A2, A1-vs-A3, B1-vs-B2, B1-vs-B3	-	GO:0005543//phospholipid binding	GO:0009987//cellular process
	osa-miR396e-5p	LOC_Os06g02560	A1-vs-A2, A1-vs-A3, B1-vs-B2, B1-vs-B3	-	-	-
	osa-miR396f-5p	LOC_Os02g39840	A1-vs-A2, A1-vs-A3, B1-vs-B2, B1-vs-B3	-	GO:0003723//RNA binding;GO:0003723//RNA binding;GO:0008135//translation factor activity, nucleic acid binding	GO:0006412//translation;GO:0006412//translation;GO:0006412//translation
	osa-miR396f-5p	LOC_Os06g02560	A1-vs-A2, A1-vs-A3, B1-vs-B2, B1-vs-B3	-	-	-
	osa-miR5491	LOC_Os08g09270	A1-vs-A2, A1-vs-A3, B1-vs-B2, B1-vs-B3	GO:0009536//plastid	-	-
	osa-miR5516a	LOC_Os03g57090	A1-vs-A2, A1-vs-A3, B1-vs-B2, B1-vs-B3	GO:0043231//intracellular membrane-bounded organelle	-	GO:0006066//alcohol metabolic process;GO:0006643//membrane lipid metabolic process
	osa-miR5516b	LOC_Os03g57090	A1-vs-A2, A1-vs-A3, B1-vs-B2, B1-vs-B3	GO:0043231//intracellular membrane-bounded organelle	-	GO:0006066//alcohol metabolic process;GO:0006643//membrane lipid metabolic process
	osa-miR5818	LOC_Os12g12854	A1-vs-A2, A1-vs-A3, B1-vs-B2, B1-vs-B3	-	-	-
	osa-miR1432-5p	LOC_Os05g07210#	A1-vs-A2, A1-vs-A3, B1-vs-B2, B1-vs-B3, A1-vs-B1	-	GO:0046914//transition metal ion binding;GO:0046915//transition metal ion transmembrane transporter activity	GO:0051707//response to other organism;GO:0000041//transition metal ion transport
	osa-miR1432-5p	LOC_Os06g13820	A1-vs-A2, A1-vs-A3, B1-vs-B2, B1-vs-B3, A1-vs-B1	-	GO:0032561//guanyl ribonucleotide binding;GO:0017111//nucleoside-triphosphatase activity;GO:0032561//guanyl ribonucleotide binding;GO:0017111//nucleoside-triphosphatase activity	GO:0009207//purine ribonucleoside triphosphate catabolic process;GO:0009207//purine ribonucleoside triphosphate catabolic process
	osa-miR164a	LOC_Os10g42090	A1-vs-A2, B1-vs-B2, B1-vs-B3, A1-vs-B1	GO:0043231//intracellular membrane-bounded organelle;GO:0043231//intracellular membrane-bounded organelle	-	-
	osa-miR164a	LOC_Os12g41680	A1-vs-A2*, B1-vs-B2*, B1-vs-B3, A1-vs-B1	-	GO:0003676//nucleic acid binding	-
	osa-miR164b	LOC_Os01g62660	A1-vs-A2, A1-vs-A3, B1-vs-B2, B1-vs-B3, A1-vs-B1	GO:0043231//intracellular membrane-bounded organelle	GO:0003676//nucleic acid binding;GO:0001071//nucleic acid binding transcription factor activity	GO:0006351//transcription, DNA-dependent
	osa-miR164b	LOC_Os06g46270	A1-vs-A2*, A1-vs-A3*, B1-vs-B2*, B1-vs-B3*, A1-vs-B1	-	GO:0003676//nucleic acid binding	-
	osa-miR164f	LOC_Os01g62660	A1-vs-A2, A1-vs-A3, B1-vs-B2, B1-vs-B3, A1-vs-B1	GO:0043231//intracellular membrane-bounded organelle	GO:0003676//nucleic acid binding;GO:0001071//nucleic acid binding transcription factor activity	GO:0006351//transcription, DNA-dependent
	osa-miR164f	LOC_Os06g46270	A1-vs-A2*, A1-vs-A3, B1-vs-B2, B1-vs-B3*, A1-vs-B1	-	GO:0003676//nucleic acid binding	-
	osa-miR172a	LOC_Os05g41070	A1-vs-A2, A1-vs-A3, B1-vs-B2, B1-vs-B3, A1-vs-B1	-	GO:0005488//binding	-
	osa-miR172d-3p	LOC_Os05g41070	A1-vs-A2, A1-vs-A3, B1-vs-B2, B1-vs-B3, A1-vs-B1	-	GO:0005488//binding	-
	osa-miR5499	LOC_Os11g10640	A1-vs-A2*, A1-vs-A3, B1-vs-B2, B1-vs-B3, A1-vs-B1	-	-	-
	osa-miR5516a	LOC_Os02g25840	A1-vs-A2, A1-vs-A3, B1-vs-B2, B1-vs-B3*, A1-vs-B1	GO:0044424//intracellular part	-	GO:0022406//membrane docking;GO:0016192//vesicle-mediated transport
	osa-miR5516b	LOC_Os02g25840	A1-vs-A2, A1-vs-A3, B1-vs-B2, B1-vs-B3*, A1-vs-B1	GO:0044424//intracellular part	-	GO:0022406//membrane docking;GO:0016192//vesicle-mediated transport
	osa-miR5490	LOC_Os05g38040	A1-vs-A2*, A1-vs-A3*, B1-vs-B2*, B1-vs-B3*, A1-vs-B1, A3-vs-B3	-	-	-
	osa-miR5490	LOC_Os11g08590	A1-vs-A2, A1-vs-A3, B1-vs-B2, B1-vs-B3, A1-vs-B1, A3-vs-B3	GO:0044424//intracellular part	GO:0016301//kinase activity;GO:0043169//cation binding	-
	osa-miR5497	LOC_Os06g37750	A1-vs-A2, A1-vs-A3, B1-vs-B2, B1-vs-B3, A1-vs-B1, A3-vs-B3	GO:0031410//cytoplasmic vesicle	GO:0030246//carbohydrate binding;GO:0004672//protein kinase activity;GO:0032559//adenyl ribonucleotide binding	GO:0006464//cellular protein modification process;GO:0008037//cell recognition
	osa-miR159a.2	LOC_Os10g37240	A1-vs-A2, A1-vs-A3*, B1-vs-B2, B2-vs-B3, B1-vs-B3*	-	-	-
	osa-miR159a.2	LOC_Os10g40920	A1-vs-A2, A1-vs-A3, B1-vs-B2, B2-vs-B3, B1-vs-B3	GO:0043231//intracellular membrane-bounded organelle	-	-
	osa-miR164b	LOC_Os02g24020	A1-vs-A2, A1-vs-A3, B1-vs-B2, B2-vs-B3, B1-vs-B3	GO:0009536//plastid	GO:0016628//oxidoreductase activity, acting on the CH-CH group of donors, NAD or NADP as acceptor	GO:0009089//lysine biosynthetic process via diaminopimelate
	osa-miR164f	LOC_Os02g24020	A1-vs-A2, A1-vs-A3, B1-vs-B2, B2-vs-B3, B1-vs-B3	GO:0009536//plastid	GO:0016628//oxidoreductase activity, acting on the CH-CH group of donors, NAD or NADP as acceptor	GO:0009089//lysine biosynthetic process via diaminopimelate
	osa-miR319a-3p	LOC_Os05g49610	A1-vs-A2, A1-vs-A3, B1-vs-B2, B2-vs-B3, B1-vs-B3	-	-	-
	osa-miR319b	LOC_Os03g12550	A1-vs-A2, A1-vs-A3, B1-vs-B2, B2-vs-B3, B1-vs-B3*	GO:0043231//intracellular membrane-bounded organelle	-	-
	osa-miR319b	LOC_Os09g31458	A1-vs-A2, A1-vs-A3, B1-vs-B2, B2-vs-B3, B1-vs-B3	-	-	-
	osa-miR164a	LOC_Os09g37700	A1-vs-A2, B1-vs-B2, B2-vs-B3, B1-vs-B3, A1-vs-B1	-	-	-
	osa-miR164b	LOC_Os02g18690	A1-vs-A2*, A1-vs-A3, B1-vs-B2*, B2-vs-B3, B1-vs-B3*, A1-vs-B1	-	-	-
	osa-miR164f	LOC_Os02g18690	A1-vs-A2*, A1-vs-A3*, B1-vs-B2, B2-vs-B3, B1-vs-B3*, A1-vs-B1	-	-	-
	osa-miR5499	LOC_Os08g35700	A1-vs-A2, A1-vs-A3, B1-vs-B2, B2-vs-B3, B1-vs-B3*, A1-vs-B1	-	-	-
	osa-miR5806	LOC_Os08g42610	A1-vs-A2, A1-vs-A3, B1-vs-B2, B2-vs-B3, B1-vs-B3, A1-vs-B1	-	-	-
	osa-miR160a-5p	LOC_Os06g47150	A1-vs-A2, A1-vs-A3*, B1-vs-B2*, B2-vs-B3*, B1-vs-B3*, A2-vs-B2	GO:0043231//intracellular membrane-bounded organelle;GO:0043231//intracellular membrane-bounded organelle;GO:0043231//intracellular membrane-bounded organelle;GO:0043231//intracellular membrane-bounded organelle	GO:0003676//nucleic acid binding;GO:0005515//protein binding;GO:0003676//nucleic acid binding;GO:0005515//protein binding;GO:0003676//nucleic acid binding;GO:0005515//protein binding;GO:0003676//nucleic acid binding;GO:0005515//protein binding	GO:0006351//transcription, DNA-dependent;GO:0009755//hormone-mediated signaling pathway;GO:0006351//transcription, DNA-dependent;GO:0009755//hormone-mediated signaling pathway;GO:0006351//transcription, DNA-dependent;GO:0009755//hormone-mediated signaling pathway;GO:0006351//transcription, DNA-dependent;GO:0009755//hormone-mediated signaling pathway
	osa-miR160b-5p	LOC_Os06g47150	A1-vs-A2, A1-vs-A3*, B1-vs-B2*, B2-vs-B3*, B1-vs-B3*, A2-vs-B2	GO:0043231//intracellular membrane-bounded organelle;GO:0043231//intracellular membrane-bounded organelle;GO:0043231//intracellular membrane-bounded organelle;GO:0043231//intracellular membrane-bounded organelle	GO:0003676//nucleic acid binding;GO:0005515//protein binding;GO:0003676//nucleic acid binding;GO:0005515//protein binding;GO:0003676//nucleic acid binding;GO:0005515//protein binding;GO:0003676//nucleic acid binding;GO:0005515//protein binding	GO:0006351//transcription, DNA-dependent;GO:0009755//hormone-mediated signaling pathway;GO:0006351//transcription, DNA-dependent;GO:0009755//hormone-mediated signaling pathway;GO:0006351//transcription, DNA-dependent;GO:0009755//hormone-mediated signaling pathway;GO:0006351//transcription, DNA-dependent;GO:0009755//hormone-mediated signaling pathway
	osa-miR160c-5p	LOC_Os06g47150	A1-vs-A2, A1-vs-A3*, B1-vs-B2*, B2-vs-B3*, B1-vs-B3*, A2-vs-B2	GO:0043231//intracellular membrane-bounded organelle;GO:0043231//intracellular membrane-bounded organelle;GO:0043231//intracellular membrane-bounded organelle;GO:0043231//intracellular membrane-bounded organelle	GO:0003676//nucleic acid binding;GO:0005515//protein binding;GO:0003676//nucleic acid binding;GO:0005515//protein binding;GO:0003676//nucleic acid binding;GO:0005515//protein binding;GO:0003676//nucleic acid binding;GO:0005515//protein binding	GO:0006351//transcription, DNA-dependent;GO:0009755//hormone-mediated signaling pathway;GO:0006351//transcription, DNA-dependent;GO:0009755//hormone-mediated signaling pathway;GO:0006351//transcription, DNA-dependent;GO:0009755//hormone-mediated signaling pathway;GO:0006351//transcription, DNA-dependent;GO:0009755//hormone-mediated signaling pathway
	osa-miR160d-5p	LOC_Os06g47150	A1-vs-A2, A1-vs-A3*, B1-vs-B2*, B2-vs-B3*, B1-vs-B3*, A2-vs-B2	GO:0043231//intracellular membrane-bounded organelle;GO:0043231//intracellular membrane-bounded organelle;GO:0043231//intracellular membrane-bounded organelle;GO:0043231//intracellular membrane-bounded organelle	GO:0003676//nucleic acid binding;GO:0005515//protein binding;GO:0003676//nucleic acid binding;GO:0005515//protein binding;GO:0003676//nucleic acid binding;GO:0005515//protein binding;GO:0003676//nucleic acid binding;GO:0005515//protein binding	GO:0006351//transcription, DNA-dependent;GO:0009755//hormone-mediated signaling pathway;GO:0006351//transcription, DNA-dependent;GO:0009755//hormone-mediated signaling pathway;GO:0006351//transcription, DNA-dependent;GO:0009755//hormone-mediated signaling pathway;GO:0006351//transcription, DNA-dependent;GO:0009755//hormone-mediated signaling pathway
	osa-miR160d-3p	LOC_Os01g06000	A1-vs-A2, A1-vs-A3, B1-vs-B3	-	-	-
	osa-miR5161	LOC_Os01g62660	A1-vs-A2, A1-vs-A3, B1-vs-B3	GO:0043231//intracellular membrane-bounded organelle	GO:0003676//nucleic acid binding;GO:0001071//nucleic acid binding transcription factor activity	GO:0006351//transcription, DNA-dependent
	osa-miR5161	LOC_Os02g12654	A1-vs-A2, A1-vs-A3*, B1-vs-B3	-	GO:0004713//protein tyrosine kinase activity;GO:0032559//adenyl ribonucleotide binding	GO:0050896//response to stimulus;GO:0006464//cellular protein modification process
	osa-miR5161	LOC_Os03g01240	A1-vs-A2, A1-vs-A3, B1-vs-B3	GO:0044464//cell part	-	-
	osa-miR5161	LOC_Os03g03610	A1-vs-A2, A1-vs-A3, B1-vs-B3	GO:0043234//protein complex;GO:0016020//membrane;GO:0043234//protein complex;GO:0016020//membrane;GO:0043234//protein complex;GO:0016020//membrane	GO:0035251//UDP-glucosyltransferase activity;GO:0035251//UDP-glucosyltransferase activity;GO:0035251//UDP-glucosyltransferase activity	GO:0006074//(1->3)-beta-D-glucan metabolic process;GO:0006074//(1->3)-beta-D-glucan metabolic process;GO:0006074//(1->3)-beta-D-glucan metabolic process
	osa-miR5161	LOC_Os03g62830	A1-vs-A2, A1-vs-A3, B1-vs-B3	GO:0043231//intracellular membrane-bounded organelle	-	-
	osa-miR5161	LOC_Os09g28040	A1-vs-A2, A1-vs-A3, B1-vs-B3	-	GO:0004175//endopeptidase activity	GO:0019538//protein metabolic process
	osa-miR5161	LOC_Os10g26164	A1-vs-A2, A1-vs-A3, B1-vs-B3	GO:0043231//intracellular membrane-bounded organelle	GO:0003824//catalytic activity	-
	osa-miR5161	LOC_Os10g32540	A1-vs-A2, A1-vs-A3, B1-vs-B3	GO:0000229;GO:0009536//plastid	GO:0003676//nucleic acid binding	-
	osa-miR5161	LOC_Os11g01074	A1-vs-A2, A1-vs-A3, B1-vs-B3	-	GO:0003824//catalytic activity;GO:0003824//catalytic activity	-
	osa-miR5161	LOC_Os12g01060	A1-vs-A2, A1-vs-A3, B1-vs-B3	-	-	-
	osa-miR5491	LOC_Os12g32374	A1-vs-A2, A1-vs-A3*, B1-vs-B3	-	GO:0046914//transition metal ion binding	-
	osa-miR160d-3p	LOC_Os06g27830	A1-vs-A2, A1-vs-A3, B1-vs-B3, A2-vs-B2	-	-	-
	osa-miR394	LOC_Os01g69940	A1-vs-A2, A1-vs-A3, B1-vs-B3, A3-vs-B3	-	-	-
	osa-miR5161	LOC_Os04g48520	A1-vs-A2, A1-vs-A3	GO:0043231//intracellular membrane-bounded organelle	-	-
	osa-miR5161	LOC_Os07g45350	A1-vs-A2, A1-vs-A3	-	GO:0016879//ligase activity, forming carbon-nitrogen bonds;GO:0046914//transition metal ion binding;GO:0016879//ligase activity, forming carbon-nitrogen bonds;GO:0046914//transition metal ion binding;GO:0016879//ligase activity, forming carbon-nitrogen bonds;GO:0046914//transition metal ion binding;GO:0016879//ligase activity, forming carbon-nitrogen bonds;GO:0046914//transition metal ion binding…	-
	osa-miR160d-3p	LOC_Os07g01230	A1-vs-A2, A1-vs-A3, B2-vs-B3, A2-vs-B2	GO:0043231//intracellular membrane-bounded organelle;GO:0016020//membrane	-	-
	osa-miR160d-3p	LOC_Os12g03440	A1-vs-A2, A1-vs-A3, B2-vs-B3, B1-vs-B3*	-	-	-
	osa-miR319b	LOC_Os01g55100	A1-vs-A2, A1-vs-A3, B2-vs-B3, B1-vs-B3	-	-	-
	osa-miR319b	LOC_Os03g57190	A1-vs-A2, A1-vs-A3, B2-vs-B3*, B1-vs-B3	-	-	-
	osa-miR160d-3p	LOC_Os05g18840	A1-vs-A2, A1-vs-A3, B2-vs-B3, B1-vs-B3, A2-vs-B2	-	GO:0003676//nucleic acid binding;GO:0034061//DNA polymerase activity	GO:0006260//DNA replication
	osa-miR160e-5p	LOC_Os06g47150	A1-vs-A2, A1-vs-A3*, B2-vs-B3*, B1-vs-B3*, A2-vs-B2	GO:0043231//intracellular membrane-bounded organelle;GO:0043231//intracellular membrane-bounded organelle;GO:0043231//intracellular membrane-bounded organelle;GO:0043231//intracellular membrane-bounded organelle	GO:0003676//nucleic acid binding;GO:0005515//protein binding;GO:0003676//nucleic acid binding;GO:0005515//protein binding;GO:0003676//nucleic acid binding;GO:0005515//protein binding;GO:0003676//nucleic acid binding;GO:0005515//protein binding	GO:0006351//transcription, DNA-dependent;GO:0009755//hormone-mediated signaling pathway;GO:0006351//transcription, DNA-dependent;GO:0009755//hormone-mediated signaling pathway;GO:0006351//transcription, DNA-dependent;GO:0009755//hormone-mediated signaling pathway;GO:0006351//transcription, DNA-dependent;GO:0009755//hormone-mediated signaling pathway
	osa-miR394	LOC_Os07g13580	A1-vs-A2, A1-vs-A3*, B2-vs-B3, B1-vs-B3, A2-vs-B2, A3-vs-B3	GO:0031410//cytoplasmic vesicle;GO:0031410//cytoplasmic vesicle	GO:0004553//hydrolase activity, hydrolyzing O-glycosyl compounds;GO:0043167//ion binding;GO:0004553//hydrolase activity, hydrolyzing O-glycosyl compounds;GO:0043167//ion binding	GO:0044238//primary metabolic process;GO:0044238//primary metabolic process
	osa-miR156l-5p	LOC_Os06g45310	A1-vs-A2, A1-vs-B1	-	-	-
	osa-miR156l-5p	LOC_Os11g30370	A1-vs-A2, A1-vs-B1	-	-	-
	osa-miR164b	LOC_Os05g51110	A1-vs-A2, A1-vs-B1	-	-	GO:0009725//response to hormone stimulus;GO:0006355//regulation of transcription, DNA-dependent
	osa-miR164f	LOC_Os05g51110	A1-vs-A2, A1-vs-B1	-	-	GO:0009725//response to hormone stimulus;GO:0006355//regulation of transcription, DNA-dependent
	osa-miR1846a-5p	LOC_Os02g03330	A1-vs-A2, A1-vs-B1	-	-	-
	osa-miR1846a-5p	LOC_Os02g22374	A1-vs-A2, A1-vs-B1	-	-	-
	osa-miR1846a-5p	LOC_Os03g61620	A1-vs-A2, A1-vs-B1	-	-	-
	osa-miR1846a-5p	LOC_Os04g58860	A1-vs-A2*, A1-vs-B1	-	-	-
	osa-miR1846a-5p	LOC_Os05g01350	A1-vs-A2, A1-vs-B1	GO:0016020//membrane;GO:0030312//external encapsulating structure	GO:0003779//actin binding	GO:0007010//cytoskeleton organization
	osa-miR1846a-5p	LOC_Os10g09910	A1-vs-A2, A1-vs-B1	GO:0043231//intracellular membrane-bounded organelle	-	-
	osa-miR1846a-5p	LOC_Os10g23230	A1-vs-A2, A1-vs-B1	-	-	-
	osa-miR1846a-5p	LOC_Os11g48090	A1-vs-A2, A1-vs-B1	GO:0044464//cell part;GO:0044464//cell part;GO:0044464//cell part	GO:0004003//ATP-dependent DNA helicase activity;GO:0032559//adenyl ribonucleotide binding;GO:0008026//ATP-dependent helicase activity;GO:0003678//DNA helicase activity;GO:0000166//nucleotide binding;GO:0004003//ATP-dependent DNA helicase activity;GO:0032559//adenyl ribonucleotide binding;GO:0004003//ATP-dependent DNA helicase activity;GO:0032559//adenyl ribonucleotide binding	GO:0006259//DNA metabolic process;GO:0006259//DNA metabolic process;GO:0006259//DNA metabolic process;GO:0006259//DNA metabolic process
	osa-miR1846b-5p	LOC_Os02g03330	A1-vs-A2, A1-vs-B1	-	-	-
	osa-miR1846b-5p	LOC_Os02g22374	A1-vs-A2, A1-vs-B1	-	-	-
	osa-miR1846b-5p	LOC_Os03g61620	A1-vs-A2, A1-vs-B1	-	-	-
	osa-miR1846b-5p	LOC_Os04g58860	A1-vs-A2, A1-vs-B1	-	-	-
	osa-miR1846b-5p	LOC_Os05g01350	A1-vs-A2, A1-vs-B1	GO:0016020//membrane;GO:0030312//external encapsulating structure	GO:0003779//actin binding	GO:0007010//cytoskeleton organization
	osa-miR1846b-5p	LOC_Os10g09910	A1-vs-A2, A1-vs-B1	GO:0043231//intracellular membrane-bounded organelle	-	-
	osa-miR1846b-5p	LOC_Os10g23230	A1-vs-A2, A1-vs-B1	-	-	-
	osa-miR1846b-5p	LOC_Os11g48090	A1-vs-A2, A1-vs-B1	GO:0044464//cell part;GO:0044464//cell part;GO:0044464//cell part	GO:0004003//ATP-dependent DNA helicase activity;GO:0032559//adenyl ribonucleotide binding;GO:0008026//ATP-dependent helicase activity;GO:0003678//DNA helicase activity;GO:0000166//nucleotide binding;GO:0004003//ATP-dependent DNA helicase activity;GO:0032559//adenyl ribonucleotide binding;GO:0004003//ATP-dependent DNA helicase activity;GO:0032559//adenyl ribonucleotide binding	GO:0006259//DNA metabolic process;GO:0006259//DNA metabolic process;GO:0006259//DNA metabolic process;GO:0006259//DNA metabolic process
	osa-miR1847.1	LOC_Os03g17210	A1-vs-A2, A1-vs-B1	-	-	-
	osa-miR1847.1	LOC_Os03g39610	A1-vs-A2, A1-vs-B1	GO:0009536//plastid;GO:0009521;GO:0031224//intrinsic to membrane;GO:0009534//chloroplast thylakoid	GO:0046906//tetrapyrrole binding;GO:0043169//cation binding	GO:0006091//generation of precursor metabolites and energy;GO:0006464//cellular protein modification process;GO:0006091//generation of precursor metabolites and energy
	osa-miR1847.1	LOC_Os03g43684	A1-vs-A2, A1-vs-B1	-	-	-
	osa-miR1847.1	LOC_Os03g53890	A1-vs-A2, A1-vs-B1	-	-	-
	osa-miR1847.1	LOC_Os06g47860	A1-vs-A2, A1-vs-B1	-	-	-
	osa-miR1847.1	LOC_Os08g33830	A1-vs-A2, A1-vs-B1	-	GO:0005488//binding;GO:0005488//binding	-
	osa-miR1847.1	LOC_Os10g31856	A1-vs-A2, A1-vs-B1	GO:0043231//intracellular membrane-bounded organelle	-	-
	osa-miR1847.1	LOC_Os10g41220	A1-vs-A2, A1-vs-B1	-	GO:0003824//catalytic activity	-
	osa-miR444d.3	LOC_Os01g03070	A1-vs-A2, A1-vs-B1	-	GO:0008135//translation factor activity, nucleic acid binding;GO:0008135//translation factor activity, nucleic acid binding	GO:0006412//translation;GO:0006412//translation
	osa-miR444d.3	LOC_Os02g49840	A1-vs-A2, A1-vs-B1	GO:0043231//intracellular membrane-bounded organelle	GO:0016491//oxidoreductase activity;GO:0003677//DNA binding;GO:0016491//oxidoreductase activity;GO:0003677//DNA binding;GO:0016491//oxidoreductase activity;GO:0003677//DNA binding;GO:0003677//DNA binding;GO:0001071//nucleic acid binding transcription factor activity	GO:0006351//transcription, DNA-dependent;GO:0006351//transcription, DNA-dependent;GO:0006351//transcription, DNA-dependent;GO:0006351//transcription, DNA-dependent
	osa-miR444d.3	LOC_Os06g46060	A1-vs-A2, A1-vs-B1	GO:0031410//cytoplasmic vesicle	-	-
	osa-miR444d.3	LOC_Os10g27170	A1-vs-A2, A1-vs-B1	-	-	-
	osa-miR444d.3	LOC_Os11g37730	A1-vs-A2, A1-vs-B1	GO:0042579//microbody;GO:0042579//microbody	GO:0016765//transferase activity, transferring alkyl or aryl (other than methyl) groups;GO:0003824//catalytic activity	GO:0009404//toxin metabolic process;GO:0009404//toxin metabolic process
	osa-miR5519	LOC_Os03g24040	A1-vs-A2, A1-vs-B1, A2-vs-B2	GO:0043231//intracellular membrane-bounded organelle;GO:0031410//cytoplasmic vesicle	GO:0046914//transition metal ion binding;GO:0019787//small conjugating protein ligase activity	GO:0019941//modification-dependent protein catabolic process;GO:0032501//multicellular organismal process;GO:0032446//protein modification by small protein conjugation
	osa-miR5490	LOC_Os09g08900	A1-vs-A2, A1-vs-B1, A3-vs-B3	-	GO:0004175//endopeptidase activity;GO:0003676//nucleic acid binding;GO:0034061//DNA polymerase activity	GO:0006260//DNA replication;GO:0019538//protein metabolic process
	osa-miR159a.1	LOC_Os02g40200	A1-vs-A2, A2-vs-A3	GO:0043231//intracellular membrane-bounded organelle;GO:0031410//cytoplasmic vesicle	-	-
	osa-miR159a.1	LOC_Os06g40570	A1-vs-A2, A2-vs-A3	-	-	GO:0009555//pollen development;GO:0048017//inositol lipid-mediated signaling
	osa-miR159a.1	LOC_Os09g36650	A1-vs-A2, A2-vs-A3	GO:0043231//intracellular membrane-bounded organelle	-	-
	osa-miR159b	LOC_Os02g40200	A1-vs-A2, A2-vs-A3	GO:0043231//intracellular membrane-bounded organelle;GO:0031410//cytoplasmic vesicle	-	-
	osa-miR159b	LOC_Os06g40570	A1-vs-A2, A2-vs-A3	-	-	GO:0009555//pollen development;GO:0048017//inositol lipid-mediated signaling
	osa-miR159b	LOC_Os09g36650	A1-vs-A2, A2-vs-A3	GO:0043231//intracellular membrane-bounded organelle	-	-
	osa-miR2118b	LOC_Os01g58510	A1-vs-A2, A2-vs-A3	-	GO:0000166//nucleotide binding	-
	osa-miR2118b	LOC_Os05g34220	A1-vs-A2*, A2-vs-A3	-	-	-
	osa-miR2118b	LOC_Os08g42700	A1-vs-A2, A2-vs-A3	-	GO:0032559//adenyl ribonucleotide binding	GO:0012501//programmed cell death;GO:0006950//response to stress
	osa-miR2118n	LOC_Os01g05620	A1-vs-A2, A2-vs-A3	-	-	-
	osa-miR2118n	LOC_Os01g58510	A1-vs-A2, A2-vs-A3	-	GO:0000166//nucleotide binding	-
	osa-miR2118n	LOC_Os05g34220	A1-vs-A2, A2-vs-A3	-	-	-
	osa-miR2118n	LOC_Os08g42700	A1-vs-A2, A2-vs-A3	-	GO:0032559//adenyl ribonucleotide binding	GO:0012501//programmed cell death;GO:0006950//response to stress
	osa-miR2867-3p	LOC_Os01g74470	A1-vs-A2, A2-vs-A3	GO:0031224//intrinsic to membrane	GO:0017111//nucleoside-triphosphatase activity;GO:0015405//P-P-bond-hydrolysis-driven transmembrane transporter activity;GO:0032559//adenyl ribonucleotide binding	GO:0006810//transport;GO:0009207//purine ribonucleoside triphosphate catabolic process
	osa-miR2867-3p	LOC_Os05g39600	A1-vs-A2, A2-vs-A3	GO:0031224//intrinsic to membrane	GO:0015078//hydrogen ion transmembrane transporter activity	GO:0006811//ion transport
	osa-miR2867-3p	LOC_Os11g24484	A1-vs-A2, A2-vs-A3*	-	GO:0003824//catalytic activity	GO:0008152//metabolic process
	osa-miR2873b	LOC_Os01g34970	A1-vs-A2, A2-vs-A3	GO:0031410//cytoplasmic vesicle;GO:0016020//membrane;GO:0031410//cytoplasmic vesicle;GO:0016020//membrane	GO:0017111//nucleoside-triphosphatase activity;GO:0000166//nucleotide binding;GO:0017111//nucleoside-triphosphatase activity;GO:0000166//nucleotide binding	GO:0009987//cellular process;GO:0006810//transport;GO:0009987//cellular process;GO:0006810//transport
	osa-miR2873b	LOC_Os09g08880	A1-vs-A2, A2-vs-A3	GO:0009534//chloroplast thylakoid;GO:0033178//proton-transporting two-sector ATPase complex, catalytic domain	GO:0015078//hydrogen ion transmembrane transporter activity;GO:0019829//cation-transporting ATPase activity;GO:0032559//adenyl ribonucleotide binding	GO:0015986//ATP synthesis coupled proton transport;GO:0015988//energy coupled proton transmembrane transport, against electrochemical gradient
	osa-miR2873b	LOC_Os12g17290	A1-vs-A2, A2-vs-A3	-	-	-
	osa-miR444f	LOC_Os04g55810	A1-vs-A2, A2-vs-A3	GO:0043231//intracellular membrane-bounded organelle	-	-
	osa-miR444f	LOC_Os08g33479	A1-vs-A2, A2-vs-A3	-	-	-
	osa-miR531b	LOC_Os07g35620	A1-vs-A2, A2-vs-A3	-	-	-
	osa-miR531b	LOC_Os12g12380	A1-vs-A2, A2-vs-A3	-	GO:0046914//transition metal ion binding;GO:0046914//transition metal ion binding;GO:0046914//transition metal ion binding	-
	osa-miR531b	LOC_Os12g17290	A1-vs-A2, A2-vs-A3	-	-	-
	osa-miR1425-5p	LOC_Os01g49614	A1-vs-A2, A2-vs-A3, A1-vs-A3	GO:0031410//cytoplasmic vesicle;GO:0031410//cytoplasmic vesicle;GO:0031410//cytoplasmic vesicle	GO:0004672//protein kinase activity;GO:0032559//adenyl ribonucleotide binding	GO:0006464//cellular protein modification process
	osa-miR1425-5p	LOC_Os08g01640	A1-vs-A2, A2-vs-A3, A1-vs-A3	GO:0043231//intracellular membrane-bounded organelle	-	-
	osa-miR160e-5p	LOC_Os07g05024	A1-vs-A2, A2-vs-A3, A1-vs-A3	-	-	-
	osa-miR531b	LOC_Os01g53630	A1-vs-A2, A2-vs-A3, A1-vs-A3	-	-	-
	osa-miR531b	LOC_Os02g10310	A1-vs-A2, A2-vs-A3, A1-vs-A3	-	GO:0016823//hydrolase activity, acting on acid carbon-carbon bonds, in ketonic substances;GO:0016823//hydrolase activity, acting on acid carbon-carbon bonds, in ketonic substances;GO:0016823//hydrolase activity, acting on acid carbon-carbon bonds, in ketonic substances	GO:0006520//cellular amino acid metabolic process;GO:0006520//cellular amino acid metabolic process;GO:0006520//cellular amino acid metabolic process
	osa-miR531b	LOC_Os03g62730	A1-vs-A2, A2-vs-A3, A1-vs-A3	GO:0008287//protein serine/threonine phosphatase complex;GO:0043231//intracellular membrane-bounded organelle;GO:0008287//protein serine/threonine phosphatase complex;GO:0043231//intracellular membrane-bounded organelle;GO:0008287//protein serine/threonine phosphatase complex;GO:0043231//intracellular membrane-bounded organelle	GO:0019888//protein phosphatase regulator activity;GO:0019888//protein phosphatase regulator activity;GO:0019888//protein phosphatase regulator activity	GO:0023052//signaling;GO:0023052//signaling;GO:0023052//signaling
	osa-miR531b	LOC_Os04g54790	A1-vs-A2, A2-vs-A3, A1-vs-A3	GO:0009570//chloroplast stroma	GO:0016301//kinase activity;GO:0032559//adenyl ribonucleotide binding	GO:0006464//cellular protein modification process
	osa-miR531b	LOC_Os05g05180	A1-vs-A2, A2-vs-A3, A1-vs-A3	-	-	-
	osa-miR531b	LOC_Os08g03430	A1-vs-A2, A2-vs-A3, A1-vs-A3	-	-	-
	osa-miR531b	LOC_Os08g39370	A1-vs-A2, A2-vs-A3, A1-vs-A3	GO:0044464//cell part	-	GO:0030001//metal ion transport
	osa-miR531b	LOC_Os11g07250	A1-vs-A2, A2-vs-A3, A1-vs-A3	GO:0031410//cytoplasmic vesicle	-	-
	osa-miR1425-5p	LOC_Os05g40700	A1-vs-A2, A2-vs-A3, A1-vs-A3, A2-vs-B2	GO:0031224//intrinsic to membrane	-	-
	osa-miR1425-5p	LOC_Os10g08580	A1-vs-A2, A2-vs-A3, A1-vs-A3, A2-vs-B2	-	GO:0003913//DNA photolyase activity	-
	osa-miR1425-5p	LOC_Os10g35240	A1-vs-A2, A2-vs-A3, A1-vs-A3, A2-vs-B2	GO:0043231//intracellular membrane-bounded organelle;GO:0043231//intracellular membrane-bounded organelle	-	-
	osa-miR1425-5p	LOC_Os10g35436	A1-vs-A2, A2-vs-A3, A1-vs-A3, A2-vs-B2	GO:0043231//intracellular membrane-bounded organelle	-	-
	osa-miR160e-5p	LOC_Os10g33940	A1-vs-A2, A2-vs-A3, A1-vs-A3, A2-vs-B2	GO:0043231//intracellular membrane-bounded organelle	GO:0003676//nucleic acid binding;GO:0005515//protein binding	GO:0006351//transcription, DNA-dependent;GO:0009755//hormone-mediated signaling pathway
	osa-miR531a	LOC_Os08g04990	A1-vs-A2, A2-vs-A3, A1-vs-A3, A2-vs-B2	-	-	-
	osa-miR531b	LOC_Os02g14800	A1-vs-A2, A2-vs-A3, A1-vs-A3, A2-vs-B2	-	-	-
	osa-miR531b	LOC_Os02g44740	A1-vs-A2, A2-vs-A3, A1-vs-A3, A2-vs-B2	GO:0043231//intracellular membrane-bounded organelle	-	-
	osa-miR531b	LOC_Os02g45520	A1-vs-A2, A2-vs-A3, A1-vs-A3, A2-vs-B2	GO:0044464//cell part;GO:0044464//cell part	-	GO:0006810//transport;GO:0006810//transport
	osa-miR531b	LOC_Os02g53450	A1-vs-A2, A2-vs-A3, A1-vs-A3, A2-vs-B2	GO:0043231//intracellular membrane-bounded organelle	-	-
	osa-miR531b	LOC_Os06g18670	A1-vs-A2, A2-vs-A3, A1-vs-A3, A2-vs-B2	-	GO:0016757//transferase activity, transferring glycosyl groups;GO:0000166//nucleotide binding	GO:0006412//translation
	osa-miR531b	LOC_Os06g42370	A1-vs-A2, A2-vs-A3, A1-vs-A3, A2-vs-B2	GO:0043231//intracellular membrane-bounded organelle	-	-
	osa-miR531b	LOC_Os06g47720	A1-vs-A2, A2-vs-A3, A1-vs-A3, A2-vs-B2	GO:0031410//cytoplasmic vesicle	GO:0004672//protein kinase activity;GO:0032559//adenyl ribonucleotide binding	GO:0006464//cellular protein modification process
	osa-miR531b	LOC_Os06g48430	A1-vs-A2, A2-vs-A3, A1-vs-A3, A2-vs-B2	-	-	-
	osa-miR531b	LOC_Os07g45170	A1-vs-A2, A2-vs-A3, A1-vs-A3, A2-vs-B2	GO:0016020//membrane	GO:0003824//catalytic activity	-
	osa-miR531b	LOC_Os08g02700	A1-vs-A2, A2-vs-A3, A1-vs-A3, A2-vs-B2	GO:0043231//intracellular membrane-bounded organelle;GO:0016020//membrane	GO:0046914//transition metal ion binding;GO:0016832//aldehyde-lyase activity	GO:0006970//response to osmotic stress;GO:0010038//response to metal ion;GO:0006007//glucose catabolic process
	osa-miR531b	LOC_Os08g04990	A1-vs-A2, A2-vs-A3, A1-vs-A3, A2-vs-B2	-	-	-
	osa-miR531b	LOC_Os09g20930	A1-vs-A2, A2-vs-A3, A1-vs-A3, A2-vs-B2	-	-	-
	osa-miR531b	LOC_Os10g09150	A1-vs-A2, A2-vs-A3, A1-vs-A3, A2-vs-B2	-	-	-
	osa-miR531b	LOC_Os11g06390	A1-vs-A2, A2-vs-A3, A1-vs-A3, A2-vs-B2	GO:0030312//external encapsulating structure;GO:0031981//nuclear lumen;GO:0043232//intracellular non-membrane-bounded organelle;GO:0016020//membrane;GO:0030312//external encapsulating structure;GO:0031981//nuclear lumen;GO:0043232//intracellular non-membrane-bounded organelle;GO:0016020//membrane;GO:0030312//external encapsulating structure;GO:0031981//nuclear lumen;GO:0043232//intracellular non-…	GO:0005198//structural molecule activity;GO:0032559//adenyl ribonucleotide binding;GO:0005198//structural molecule activity;GO:0032559//adenyl ribonucleotide binding;GO:0005198//structural molecule activity;GO:0032559//adenyl ribonucleotide binding;GO:0005198//structural molecule activity;GO:0032559//adenyl ribonucleotide binding;GO:0005198//structural molecule activity;GO:0032559//adenyl ribonuc…	GO:0009314//response to radiation;GO:0009725//response to hormone stimulus;GO:0009913//epidermal cell differentiation;GO:0048588//developmental cell growth;GO:0006950//response to stress;GO:0009314//response to radiation;GO:0009725//response to hormone stimulus;GO:0009913//epidermal cell differentiation;GO:0048588//developmental cell growth;GO:0006950//response to stress;GO:0009314//response to r…
	osa-miR531b	LOC_Os11g30360	A1-vs-A2*, A2-vs-A3, A1-vs-A3*, A2-vs-B2*	GO:0031410//cytoplasmic vesicle	-	-
	osa-miR531b	LOC_Os12g32260	A1-vs-A2, A2-vs-A3, A1-vs-A3, A2-vs-B2	-	-	-
	osa-miR531c	LOC_Os08g04990	A1-vs-A2, A2-vs-A3, A1-vs-A3, A2-vs-B2	-	-	-
	osa-miR160a-5p	LOC_Os07g05024	A1-vs-A2, A2-vs-A3, A1-vs-A3, B1-vs-B2	-	-	-
	osa-miR160b-5p	LOC_Os07g05024	A1-vs-A2, A2-vs-A3, A1-vs-A3, B1-vs-B2	-	-	-
	osa-miR160c-5p	LOC_Os07g05024	A1-vs-A2, A2-vs-A3, A1-vs-A3, B1-vs-B2	-	-	-
	osa-miR160d-5p	LOC_Os07g05024	A1-vs-A2, A2-vs-A3, A1-vs-A3, B1-vs-B2	-	-	-
	osa-miR172a	LOC_Os09g21770	A1-vs-A2, A2-vs-A3, A1-vs-A3, B1-vs-B2	-	GO:0003676//nucleic acid binding;GO:0046914//transition metal ion binding	-
	osa-miR172d-3p	LOC_Os09g21770	A1-vs-A2, A2-vs-A3, A1-vs-A3, B1-vs-B2	-	GO:0003676//nucleic acid binding;GO:0046914//transition metal ion binding	-
	osa-miR160a-5p	LOC_Os10g33940	A1-vs-A2, A2-vs-A3, A1-vs-A3, B1-vs-B2, A2-vs-B2	GO:0043231//intracellular membrane-bounded organelle	GO:0003676//nucleic acid binding;GO:0005515//protein binding	GO:0006351//transcription, DNA-dependent;GO:0009755//hormone-mediated signaling pathway
	osa-miR160b-5p	LOC_Os10g33940	A1-vs-A2, A2-vs-A3, A1-vs-A3, B1-vs-B2, A2-vs-B2	GO:0043231//intracellular membrane-bounded organelle	GO:0003676//nucleic acid binding;GO:0005515//protein binding	GO:0006351//transcription, DNA-dependent;GO:0009755//hormone-mediated signaling pathway
	osa-miR160c-5p	LOC_Os10g33940	A1-vs-A2, A2-vs-A3, A1-vs-A3, B1-vs-B2, A2-vs-B2	GO:0043231//intracellular membrane-bounded organelle	GO:0003676//nucleic acid binding;GO:0005515//protein binding	GO:0006351//transcription, DNA-dependent;GO:0009755//hormone-mediated signaling pathway
	osa-miR160d-5p	LOC_Os10g33940	A1-vs-A2, A2-vs-A3, A1-vs-A3, B1-vs-B2, A2-vs-B2	GO:0043231//intracellular membrane-bounded organelle	GO:0003676//nucleic acid binding;GO:0005515//protein binding	GO:0006351//transcription, DNA-dependent;GO:0009755//hormone-mediated signaling pathway
	osa-miR5497	LOC_Os04g45160	A1-vs-A2, A2-vs-A3, A1-vs-A3, B1-vs-B2, B1-vs-B3	GO:0043231//intracellular membrane-bounded organelle;GO:0043231//intracellular membrane-bounded organelle	-	-
	osa-miR5499	LOC_Os07g47340	A1-vs-A2, A2-vs-A3, A1-vs-A3, B1-vs-B2, B1-vs-B3	-	-	-
	osa-miR172a	LOC_Os08g39080	A1-vs-A2, A2-vs-A3, A1-vs-A3, B1-vs-B2, B1-vs-B3, A1-vs-B1	-	GO:0005488//binding	GO:0009725//response to hormone stimulus;GO:0006605//protein targeting
	osa-miR172d-3p	LOC_Os08g39080	A1-vs-A2, A2-vs-A3, A1-vs-A3, B1-vs-B2, B1-vs-B3, A1-vs-B1	-	GO:0005488//binding	GO:0009725//response to hormone stimulus;GO:0006605//protein targeting
	osa-miR5499	LOC_Os03g49730	A1-vs-A2, A2-vs-A3, A1-vs-A3, B1-vs-B2, B1-vs-B3, A1-vs-B1	-	GO:0046914//transition metal ion binding;GO:0046914//transition metal ion binding;GO:0046914//transition metal ion binding;GO:0046914//transition metal ion binding	-
	osa-miR5499	LOC_Os09g11450	A1-vs-A2, A2-vs-A3, A1-vs-A3, B1-vs-B2, B1-vs-B3, A1-vs-B1	GO:0044464//cell part;GO:0044464//cell part	-	-
	osa-miR5499	LOC_Os09g39670	A1-vs-A2, A2-vs-A3, A1-vs-A3, B1-vs-B2, B1-vs-B3, A1-vs-B1	GO:0043231//intracellular membrane-bounded organelle	GO:0016628//oxidoreductase activity, acting on the CH-CH group of donors, NAD or NADP as acceptor	GO:0008152//metabolic process
	osa-miR5793	LOC_Os12g11830	A1-vs-A2, A2-vs-A3, A1-vs-A3, B1-vs-B2, B1-vs-B3, A1-vs-B1	-	-	-
	osa-miR172a	LOC_Os05g03040	A1-vs-A2, A2-vs-A3, A1-vs-A3*, B1-vs-B2*, B2-vs-B3, B1-vs-B3*, A1-vs-B1	GO:0043231//intracellular membrane-bounded organelle;GO:0043231//intracellular membrane-bounded organelle	GO:0003676//nucleic acid binding;GO:0001071//nucleic acid binding transcription factor activity;GO:0016491//oxidoreductase activity;GO:0003676//nucleic acid binding;GO:0001071//nucleic acid binding transcription factor activity;GO:0016491//oxidoreductase activity	GO:0008152//metabolic process;GO:0006351//transcription, DNA-dependent;GO:0009653//anatomical structure morphogenesis;GO:0003006//developmental process involved in reproduction;GO:0006351//transcription, DNA-dependent;GO:0009653//anatomical structure morphogenesis;GO:0003006//developmental process involved in reproduction
	osa-miR172a	LOC_Os08g03670	A1-vs-A2, A2-vs-A3, A1-vs-A3, B1-vs-B2, B2-vs-B3, B1-vs-B3, A1-vs-B1	GO:0043231//intracellular membrane-bounded organelle;GO:0031224//intrinsic to membrane;GO:0016020//membrane	GO:0030246//carbohydrate binding;GO:0035250//UDP-galactosyltransferase activity;GO:0016758//transferase activity, transferring hexosyl groups	GO:0006464//cellular protein modification process
	osa-miR172d-3p	LOC_Os05g03040	A1-vs-A2, A2-vs-A3, A1-vs-A3*, B1-vs-B2*, B2-vs-B3, B1-vs-B3*, A1-vs-B1	GO:0043231//intracellular membrane-bounded organelle;GO:0043231//intracellular membrane-bounded organelle	GO:0003676//nucleic acid binding;GO:0001071//nucleic acid binding transcription factor activity;GO:0016491//oxidoreductase activity;GO:0003676//nucleic acid binding;GO:0001071//nucleic acid binding transcription factor activity;GO:0016491//oxidoreductase activity	GO:0008152//metabolic process;GO:0006351//transcription, DNA-dependent;GO:0009653//anatomical structure morphogenesis;GO:0003006//developmental process involved in reproduction;GO:0006351//transcription, DNA-dependent;GO:0009653//anatomical structure morphogenesis;GO:0003006//developmental process involved in reproduction
	osa-miR172d-3p	LOC_Os08g03670	A1-vs-A2, A2-vs-A3, A1-vs-A3, B1-vs-B2, B2-vs-B3, B1-vs-B3, A1-vs-B1	GO:0043231//intracellular membrane-bounded organelle;GO:0031224//intrinsic to membrane;GO:0016020//membrane	GO:0030246//carbohydrate binding;GO:0035250//UDP-galactosyltransferase activity;GO:0016758//transferase activity, transferring hexosyl groups	GO:0006464//cellular protein modification process
	osa-miR160a-5p	LOC_Os04g43910	A1-vs-A2, A2-vs-A3, A1-vs-A3, B1-vs-B2, B2-vs-B3, B1-vs-B3*, A2-vs-B2	-	-	-
	osa-miR160b-5p	LOC_Os04g43910	A1-vs-A2, A2-vs-A3, A1-vs-A3, B1-vs-B2, B2-vs-B3, B1-vs-B3*, A2-vs-B2	-	-	-
	osa-miR160c-5p	LOC_Os04g43910	A1-vs-A2, A2-vs-A3, A1-vs-A3, B1-vs-B2, B2-vs-B3, B1-vs-B3*, A2-vs-B2	-	-	-
	osa-miR160d-5p	LOC_Os04g43910	A1-vs-A2, A2-vs-A3, A1-vs-A3, B1-vs-B2, B2-vs-B3, B1-vs-B3*, A2-vs-B2	-	-	-
	osa-miR172a	LOC_Os06g49320	A1-vs-A2, A2-vs-A3, A1-vs-A3, B2-vs-B3, B1-vs-B3	GO:0043231//intracellular membrane-bounded organelle	GO:0016740//transferase activity	-
	osa-miR172d-3p	LOC_Os06g49320	A1-vs-A2, A2-vs-A3, A1-vs-A3, B2-vs-B3, B1-vs-B3	GO:0043231//intracellular membrane-bounded organelle	GO:0016740//transferase activity	-
	osa-miR172a	LOC_Os03g57070	A1-vs-A2, A2-vs-A3, A1-vs-A3, B2-vs-B3, B1-vs-B3, A1-vs-B1	GO:0031410//cytoplasmic vesicle;GO:0031410//cytoplasmic vesicle;GO:0031410//cytoplasmic vesicle;GO:0031410//cytoplasmic vesicle	GO:0003824//catalytic activity;GO:0003824//catalytic activity;GO:0003824//catalytic activity;GO:0003824//catalytic activity	-
	osa-miR172d-3p	LOC_Os03g57070	A1-vs-A2, A2-vs-A3, A1-vs-A3, B2-vs-B3, B1-vs-B3, A1-vs-B1	GO:0031410//cytoplasmic vesicle;GO:0031410//cytoplasmic vesicle;GO:0031410//cytoplasmic vesicle;GO:0031410//cytoplasmic vesicle	GO:0003824//catalytic activity;GO:0003824//catalytic activity;GO:0003824//catalytic activity;GO:0003824//catalytic activity	-
	osa-miR160e-5p	LOC_Os04g43910	A1-vs-A2, A2-vs-A3, A1-vs-A3, B2-vs-B3, B1-vs-B3*, A2-vs-B2	-	-	-
	osa-miR1425-5p	LOC_Os02g49730	A1-vs-A2, A2-vs-A3, A2-vs-B2	-	-	-
	osa-miR2873b	LOC_Os01g07940	A1-vs-A2, A2-vs-A3, A2-vs-B2	GO:0031981//nuclear lumen	GO:0004672//protein kinase activity;GO:0032559//adenyl ribonucleotide binding	GO:0006464//cellular protein modification process
	osa-miR2873b	LOC_Os05g31440	A1-vs-A2, A2-vs-A3, A2-vs-B2	-	-	-
	osa-miR2873b	LOC_Os06g05700	A1-vs-A2, A2-vs-A3*, A2-vs-B2	-	GO:0016835//carbon-oxygen lyase activity;GO:0048037//cofactor binding	GO:0006563//L-serine metabolic process
	osa-miR2873b	LOC_Os07g25730	A1-vs-A2, A2-vs-A3, A2-vs-B2	-	-	-
	osa-miR2873b	LOC_Os08g09300	A1-vs-A2, A2-vs-A3, A2-vs-B2	-	-	-
	osa-miR444f	LOC_Os03g43670	A1-vs-A2, A2-vs-A3, A2-vs-B2	GO:0031410//cytoplasmic vesicle	GO:0004871//signal transducer activity;GO:0004672//protein kinase activity;GO:0032559//adenyl ribonucleotide binding	GO:0006464//cellular protein modification process
	osa-miR444f	LOC_Os05g23370	A1-vs-A2, A2-vs-A3, A2-vs-B2	-	-	-
	osa-miR444f	LOC_Os11g05850	A1-vs-A2, A2-vs-A3, A2-vs-B2	GO:0043231//intracellular membrane-bounded organelle	-	-
	osa-miR444f	LOC_Os11g39350	A1-vs-A2, A2-vs-A3, A2-vs-B2	-	GO:0000166//nucleotide binding;GO:0000166//nucleotide binding	-
	osa-miR531b	LOC_Os01g04650	A1-vs-A2, A2-vs-A3, A2-vs-B2	-	-	-
	osa-miR531b	LOC_Os01g55490	A1-vs-A2, A2-vs-A3, A2-vs-B2	GO:0043231//intracellular membrane-bounded organelle;GO:0043231//intracellular membrane-bounded organelle;GO:0043231//intracellular membrane-bounded organelle;GO:0043231//intracellular membrane-bounded organelle	-	-
	osa-miR531b	LOC_Os01g69190	A1-vs-A2, A2-vs-A3, A2-vs-B2	GO:0031410//cytoplasmic vesicle	-	-
	osa-miR531b	LOC_Os03g07920	A1-vs-A2, A2-vs-A3, A2-vs-B2	GO:0043231//intracellular membrane-bounded organelle	-	-
	osa-miR531b	LOC_Os03g44290	A1-vs-A2, A2-vs-A3, A2-vs-B2	GO:0031410//cytoplasmic vesicle;GO:0031410//cytoplasmic vesicle;GO:0031410//cytoplasmic vesicle	-	GO:0000003//reproduction;GO:0000003//reproduction;GO:0000003//reproduction
	osa-miR531b	LOC_Os04g53990	A1-vs-A2, A2-vs-A3, A2-vs-B2	GO:0043231//intracellular membrane-bounded organelle	-	-
	osa-miR531b	LOC_Os04g54800	A1-vs-A2, A2-vs-A3*, A2-vs-B2*	GO:0043231//intracellular membrane-bounded organelle;GO:0043231//intracellular membrane-bounded organelle;GO:0043231//intracellular membrane-bounded organelle	GO:0046872//metal ion binding;GO:0016301//kinase activity;GO:0032559//adenyl ribonucleotide binding;GO:0046872//metal ion binding;GO:0016301//kinase activity;GO:0032559//adenyl ribonucleotide binding;GO:0046872//metal ion binding;GO:0016301//kinase activity;GO:0032559//adenyl ribonucleotide binding	GO:0008652//cellular amino acid biosynthetic process;GO:0008652//cellular amino acid biosynthetic process;GO:0008652//cellular amino acid biosynthetic process
	osa-miR531b	LOC_Os05g01290	A1-vs-A2*, A2-vs-A3*, A2-vs-B2	GO:0031410//cytoplasmic vesicle	-	-
	osa-miR531b	LOC_Os05g23350	A1-vs-A2, A2-vs-A3, A2-vs-B2	-	GO:0016787//hydrolase activity	GO:0008152//metabolic process
	osa-miR531b	LOC_Os05g31440	A1-vs-A2, A2-vs-A3, A2-vs-B2	-	-	-
	osa-miR531b	LOC_Os07g11020	A1-vs-A2, A2-vs-A3, A2-vs-B2	-	-	-
	osa-miR531b	LOC_Os07g35350	A1-vs-A2, A2-vs-A3, A2-vs-B2	GO:0031410//cytoplasmic vesicle;GO:0031410//cytoplasmic vesicle;GO:0031410//cytoplasmic vesicle	-	-
	osa-miR531b	LOC_Os08g01830	A1-vs-A2, A2-vs-A3*, A2-vs-B2*	GO:0031410//cytoplasmic vesicle	-	-
	osa-miR531b	LOC_Os08g02420	A1-vs-A2, A2-vs-A3, A2-vs-B2	-	GO:0016628//oxidoreductase activity, acting on the CH-CH group of donors, NAD or NADP as acceptor;GO:0046872//metal ion binding;GO:0016772//transferase activity, transferring phosphorus-containing groups	GO:0006796//phosphate-containing compound metabolic process
	osa-miR531b	LOC_Os08g40840	A1-vs-A2, A2-vs-A3, A2-vs-B2	-	-	-
	osa-miR531b	LOC_Os10g07229	A1-vs-A2, A2-vs-A3, A2-vs-B2	-	GO:0016491//oxidoreductase activity;GO:0046914//transition metal ion binding	GO:0008152//metabolic process
	osa-miR531b	LOC_Os10g27360	A1-vs-A2, A2-vs-A3, A2-vs-B2	-	-	-
	osa-miR531b	LOC_Os10g34420	A1-vs-A2, A2-vs-A3, A2-vs-B2	-	-	-
	osa-miR531b	LOC_Os11g08410	A1-vs-A2, A2-vs-A3, A2-vs-B2	GO:0031981//nuclear lumen	GO:0046914//transition metal ion binding;GO:0003677//DNA binding;GO:0001071//nucleic acid binding transcription factor activity	GO:0006351//transcription, DNA-dependent;GO:0048511//rhythmic process
	osa-miR531b	LOC_Os11g26720	A1-vs-A2, A2-vs-A3, A2-vs-B2	-	-	-
	osa-miR531b	LOC_Os11g39680	A1-vs-A2, A2-vs-A3, A2-vs-B2	GO:0043231//intracellular membrane-bounded organelle	-	-
	osa-miR159a.1	LOC_Os01g47530	A1-vs-A2, A2-vs-A3, B1-vs-B2	-	GO:0004702//receptor signaling protein serine/threonine kinase activity;GO:0032559//adenyl ribonucleotide binding;GO:0004702//receptor signaling protein serine/threonine kinase activity;GO:0032559//adenyl ribonucleotide binding;GO:0004702//receptor signaling protein serine/threonine kinase activity;GO:0032559//adenyl ribonucleotide binding;GO:0004702//receptor signaling protein serine/threonine k…	GO:0006464//cellular protein modification process;GO:0006464//cellular protein modification process;GO:0006464//cellular protein modification process;GO:0006464//cellular protein modification process
	osa-miR159a.1	LOC_Os01g59660	A1-vs-A2, A2-vs-A3, B1-vs-B2	GO:0043231//intracellular membrane-bounded organelle;GO:0043231//intracellular membrane-bounded organelle;GO:0043231//intracellular membrane-bounded organelle;GO:0043231//intracellular membrane-bounded organelle	GO:0003676//nucleic acid binding;GO:0003676//nucleic acid binding;GO:0003676//nucleic acid binding;GO:0003676//nucleic acid binding	-
	osa-miR159a.1	LOC_Os03g58190	A1-vs-A2, A2-vs-A3, B1-vs-B2	-	-	-
	osa-miR159a.1	LOC_Os05g42240	A1-vs-A2, A2-vs-A3*, B1-vs-B2	-	-	-
	osa-miR159a.1	LOC_Os06g40330	A1-vs-A2, A2-vs-A3, B1-vs-B2	-	-	-
	osa-miR159a.1	LOC_Os11g02464	A1-vs-A2, A2-vs-A3, B1-vs-B2	GO:0043231//intracellular membrane-bounded organelle	GO:0046872//metal ion binding;GO:0004871//signal transducer activity	-
	osa-miR159a.1	LOC_Os11g05540	A1-vs-A2, A2-vs-A3, B1-vs-B2	GO:0043231//intracellular membrane-bounded organelle	-	-
	osa-miR159a.1	LOC_Os12g10740	A1-vs-A2, A2-vs-A3, B1-vs-B2	GO:0031410//cytoplasmic vesicle	GO:0004672//protein kinase activity;GO:0000166//nucleotide binding	GO:0008152//metabolic process
	osa-miR159b	LOC_Os01g47530	A1-vs-A2, A2-vs-A3, B1-vs-B2	-	GO:0004702//receptor signaling protein serine/threonine kinase activity;GO:0032559//adenyl ribonucleotide binding;GO:0004702//receptor signaling protein serine/threonine kinase activity;GO:0032559//adenyl ribonucleotide binding;GO:0004702//receptor signaling protein serine/threonine kinase activity;GO:0032559//adenyl ribonucleotide binding;GO:0004702//receptor signaling protein serine/threonine k…	GO:0006464//cellular protein modification process;GO:0006464//cellular protein modification process;GO:0006464//cellular protein modification process;GO:0006464//cellular protein modification process
	osa-miR159b	LOC_Os01g59660	A1-vs-A2, A2-vs-A3, B1-vs-B2	GO:0043231//intracellular membrane-bounded organelle;GO:0043231//intracellular membrane-bounded organelle;GO:0043231//intracellular membrane-bounded organelle;GO:0043231//intracellular membrane-bounded organelle	GO:0003676//nucleic acid binding;GO:0003676//nucleic acid binding;GO:0003676//nucleic acid binding;GO:0003676//nucleic acid binding	-
	osa-miR159b	LOC_Os03g58190	A1-vs-A2, A2-vs-A3, B1-vs-B2	-	-	-
	osa-miR159b	LOC_Os05g42240	A1-vs-A2, A2-vs-A3*, B1-vs-B2	-	-	-
	osa-miR159b	LOC_Os06g40330	A1-vs-A2, A2-vs-A3, B1-vs-B2	-	-	-
	osa-miR159b	LOC_Os11g02464	A1-vs-A2, A2-vs-A3, B1-vs-B2	GO:0043231//intracellular membrane-bounded organelle	GO:0046872//metal ion binding;GO:0004871//signal transducer activity	-
	osa-miR159b	LOC_Os11g05540	A1-vs-A2, A2-vs-A3, B1-vs-B2	GO:0043231//intracellular membrane-bounded organelle	-	-
	osa-miR159b	LOC_Os12g10740	A1-vs-A2, A2-vs-A3, B1-vs-B2	GO:0031410//cytoplasmic vesicle	GO:0004672//protein kinase activity;GO:0000166//nucleotide binding	GO:0008152//metabolic process
	osa-miR160a-5p	LOC_Os02g41800	A1-vs-A2, A2-vs-A3, B1-vs-B2, B2-vs-B3, B1-vs-B3*	-	GO:0005488//binding;GO:0005488//binding	GO:0009725//response to hormone stimulus;GO:0050794//regulation of cellular process;GO:0009725//response to hormone stimulus;GO:0050794//regulation of cellular process
	osa-miR160b-5p	LOC_Os02g41800	A1-vs-A2, A2-vs-A3, B1-vs-B2, B2-vs-B3, B1-vs-B3*	-	GO:0005488//binding;GO:0005488//binding	GO:0009725//response to hormone stimulus;GO:0050794//regulation of cellular process;GO:0009725//response to hormone stimulus;GO:0050794//regulation of cellular process
	osa-miR160c-5p	LOC_Os02g41800	A1-vs-A2, A2-vs-A3, B1-vs-B2, B2-vs-B3, B1-vs-B3*	-	GO:0005488//binding;GO:0005488//binding	GO:0009725//response to hormone stimulus;GO:0050794//regulation of cellular process;GO:0009725//response to hormone stimulus;GO:0050794//regulation of cellular process
	osa-miR160d-5p	LOC_Os02g41800	A1-vs-A2, A2-vs-A3, B1-vs-B2, B2-vs-B3, B1-vs-B3*	-	GO:0005488//binding;GO:0005488//binding	GO:0009725//response to hormone stimulus;GO:0050794//regulation of cellular process;GO:0009725//response to hormone stimulus;GO:0050794//regulation of cellular process
	osa-miR2867-3p	LOC_Os01g01050	A1-vs-A2, A2-vs-A3, B1-vs-B3	-	-	-
	osa-miR160e-5p	LOC_Os02g41800	A1-vs-A2, A2-vs-A3, B2-vs-B3, B1-vs-B3*	-	GO:0005488//binding;GO:0005488//binding	GO:0009725//response to hormone stimulus;GO:0050794//regulation of cellular process;GO:0009725//response to hormone stimulus;GO:0050794//regulation of cellular process
	osa-miR159a.2	LOC_Os10g20230	A1-vs-A2, A2-vs-B2	GO:0043231//intracellular membrane-bounded organelle;GO:0043231//intracellular membrane-bounded organelle	-	-
	osa-miR160a-3p	LOC_Os05g48960	A1-vs-A2, A2-vs-B2	GO:0043231//intracellular membrane-bounded organelle;GO:0043231//intracellular membrane-bounded organelle;GO:0043231//intracellular membrane-bounded organelle;GO:0043231//intracellular membrane-bounded organelle	GO:0046914//transition metal ion binding;GO:0003676//nucleic acid binding;GO:0046914//transition metal ion binding;GO:0003676//nucleic acid binding;GO:0046914//transition metal ion binding;GO:0003676//nucleic acid binding;GO:0046914//transition metal ion binding;GO:0003676//nucleic acid binding	-
	osa-miR160a-3p	LOC_Os08g10410	A1-vs-A2, A2-vs-B2	-	-	-
	osa-miR160b-3p	LOC_Os05g48960	A1-vs-A2, A2-vs-B2	GO:0043231//intracellular membrane-bounded organelle;GO:0043231//intracellular membrane-bounded organelle;GO:0043231//intracellular membrane-bounded organelle;GO:0043231//intracellular membrane-bounded organelle	GO:0046914//transition metal ion binding;GO:0003676//nucleic acid binding;GO:0046914//transition metal ion binding;GO:0003676//nucleic acid binding;GO:0046914//transition metal ion binding;GO:0003676//nucleic acid binding;GO:0046914//transition metal ion binding;GO:0003676//nucleic acid binding	-
	osa-miR160b-3p	LOC_Os08g10410	A1-vs-A2, A2-vs-B2	-	-	-
	osa-miR160d-3p	LOC_Os05g48960	A1-vs-A2, A2-vs-B2	GO:0043231//intracellular membrane-bounded organelle;GO:0043231//intracellular membrane-bounded organelle;GO:0043231//intracellular membrane-bounded organelle;GO:0043231//intracellular membrane-bounded organelle	GO:0046914//transition metal ion binding;GO:0003676//nucleic acid binding;GO:0046914//transition metal ion binding;GO:0003676//nucleic acid binding;GO:0046914//transition metal ion binding;GO:0003676//nucleic acid binding;GO:0046914//transition metal ion binding;GO:0003676//nucleic acid binding	-
	osa-miR444f	LOC_Os02g35160	A1-vs-A2, A2-vs-B2	-	GO:0008135//translation factor activity, nucleic acid binding;GO:0008135//translation factor activity, nucleic acid binding	GO:0006412//translation;GO:0006412//translation
	osa-miR444f	LOC_Os02g49840	A1-vs-A2, A2-vs-B2	GO:0043231//intracellular membrane-bounded organelle	GO:0016491//oxidoreductase activity;GO:0003677//DNA binding;GO:0016491//oxidoreductase activity;GO:0003677//DNA binding;GO:0016491//oxidoreductase activity;GO:0003677//DNA binding;GO:0003677//DNA binding;GO:0001071//nucleic acid binding transcription factor activity	GO:0006351//transcription, DNA-dependent;GO:0006351//transcription, DNA-dependent;GO:0006351//transcription, DNA-dependent;GO:0006351//transcription, DNA-dependent
	osa-miR444f	LOC_Os04g38780	A1-vs-A2, A2-vs-B2	-	GO:0003677//DNA binding	GO:0006351//transcription, DNA-dependent
	osa-miR5800	LOC_Os06g08820	A1-vs-A2, A2-vs-B2	-	-	-
	osa-miR396a-5p	LOC_Os02g53690	A1-vs-A2, A3-vs-B3	-	-	-
	osa-miR396a-5p	LOC_Os11g35030	A1-vs-A2, A3-vs-B3	-	-	-
	osa-miR396b-5p	LOC_Os02g53690	A1-vs-A2, A3-vs-B3	-	-	-
	osa-miR396b-5p	LOC_Os11g35030	A1-vs-A2, A3-vs-B3	-	-	-
	osa-miR156l-5p	LOC_Os09g32944	A1-vs-A2, B1-vs-B2	-	-	-
	osa-miR159a.1	LOC_Os01g11430	A1-vs-A2, B1-vs-B2*	-	-	-
	osa-miR159a.1	LOC_Os03g38210	A1-vs-A2, B1-vs-B2	GO:0043231//intracellular membrane-bounded organelle	GO:0003676//nucleic acid binding	-
	osa-miR159a.1	LOC_Os10g05230	A1-vs-A2, B1-vs-B2	-	GO:0046872//metal ion binding;GO:0046872//metal ion binding;GO:0046872//metal ion binding	-
	osa-miR159a.1	LOC_Os12g02390	A1-vs-A2, B1-vs-B2	GO:0043231//intracellular membrane-bounded organelle	GO:0046872//metal ion binding;GO:0004871//signal transducer activity	-
	osa-miR159b	LOC_Os01g11430	A1-vs-A2, B1-vs-B2	-	-	-
	osa-miR159b	LOC_Os03g38210	A1-vs-A2, B1-vs-B2	GO:0043231//intracellular membrane-bounded organelle	GO:0003676//nucleic acid binding	-
	osa-miR159b	LOC_Os10g05230	A1-vs-A2, B1-vs-B2	-	GO:0046872//metal ion binding;GO:0046872//metal ion binding;GO:0046872//metal ion binding	-
	osa-miR159b	LOC_Os12g02390	A1-vs-A2, B1-vs-B2	GO:0043231//intracellular membrane-bounded organelle	GO:0046872//metal ion binding;GO:0004871//signal transducer activity	-
	osa-miR166b-5p	LOC_Os02g13110	A1-vs-A2, B1-vs-B2	GO:0008287//protein serine/threonine phosphatase complex;GO:0008287//protein serine/threonine phosphatase complex	GO:0019888//protein phosphatase regulator activity;GO:0019888//protein phosphatase regulator activity	GO:0023052//signaling;GO:0023052//signaling
	osa-miR166b-5p	LOC_Os10g26730	A1-vs-A2, B1-vs-B2	GO:0044464//cell part;GO:0044464//cell part	GO:0004518//nuclease activity;GO:0005488//binding;GO:0004518//nuclease activity;GO:0005488//binding	-
	osa-miR396a-5p	LOC_Os03g37140	A1-vs-A2, B1-vs-B2	-	-	-
	osa-miR396a-5p	LOC_Os03g47140	A1-vs-A2, B1-vs-B2	-	-	-
	osa-miR396a-5p	LOC_Os06g10310	A1-vs-A2, B1-vs-B2	GO:0044464//cell part	-	-
	osa-miR396b-5p	LOC_Os03g37140	A1-vs-A2, B1-vs-B2	-	-	-
	osa-miR396b-5p	LOC_Os03g47140	A1-vs-A2, B1-vs-B2	-	-	-
	osa-miR396b-5p	LOC_Os06g10310	A1-vs-A2, B1-vs-B2	GO:0044464//cell part	-	-
	osa-miR396c-3p	LOC_Os09g33920	A1-vs-A2, B1-vs-B2	GO:0043231//intracellular membrane-bounded organelle;GO:0043231//intracellular membrane-bounded organelle	-	-
	osa-miR396c-5p	LOC_Os03g47140	A1-vs-A2, B1-vs-B2	-	-	-
	osa-miR396e-5p	LOC_Os03g47140	A1-vs-A2, B1-vs-B2	-	-	-
	osa-miR396f-5p	LOC_Os03g47140	A1-vs-A2, B1-vs-B2	-	-	-
	osa-miR5499	LOC_Os02g39650	A1-vs-A2, B1-vs-B2	-	-	-
	osa-miR5508	LOC_Os10g03070	A1-vs-A2, B1-vs-B2	-	GO:0016798//hydrolase activity, acting on glycosyl bonds;GO:0003676//nucleic acid binding	GO:0006259//DNA metabolic process
	osa-miR5508	LOC_Os10g32970	A1-vs-A2, B1-vs-B2	GO:0044424//intracellular part	GO:0008135//translation factor activity, nucleic acid binding	GO:0006412//translation
	osa-miR156l-5p	LOC_Os02g04680	A1-vs-A2, B1-vs-B2, A1-vs-B1	-	-	-
	osa-miR172a	LOC_Os02g56320	A1-vs-A2, B1-vs-B2, A1-vs-B1	GO:0043231//intracellular membrane-bounded organelle	-	-
	osa-miR172d-3p	LOC_Os02g56320	A1-vs-A2, B1-vs-B2, A1-vs-B1	GO:0043231//intracellular membrane-bounded organelle	-	-
	osa-miR159f	LOC_Os01g59660	A1-vs-A2, B1-vs-B2, B1-vs-B3	GO:0043231//intracellular membrane-bounded organelle;GO:0043231//intracellular membrane-bounded organelle;GO:0043231//intracellular membrane-bounded organelle;GO:0043231//intracellular membrane-bounded organelle	GO:0003676//nucleic acid binding;GO:0003676//nucleic acid binding;GO:0003676//nucleic acid binding;GO:0003676//nucleic acid binding	-
	osa-miR159f	LOC_Os06g40330	A1-vs-A2, B1-vs-B2, B1-vs-B3	-	-	-
	osa-miR164a	LOC_Os08g10080	A1-vs-A2, B1-vs-B2, B1-vs-B3, A1-vs-A3	-	-	-
	osa-miR164b	LOC_Os05g38810	A1-vs-A2, B1-vs-B2, B1-vs-B3	-	-	-
	osa-miR164f	LOC_Os05g38810	A1-vs-A2, B1-vs-B2, B1-vs-B3	-	-	-
	osa-miR166b-5p	LOC_Os08g33630	A1-vs-A2, B1-vs-B2, B1-vs-B3	GO:0031224//intrinsic to membrane;GO:0031224//intrinsic to membrane	-	-
	osa-miR396a-5p	LOC_Os04g52040	A1-vs-A2, B1-vs-B2, B1-vs-B3	-	-	-
	osa-miR396a-5p	LOC_Os06g02560	A1-vs-A2, B1-vs-B2, B1-vs-B3	-	-	-
	osa-miR396a-5p	LOC_Os06g28060	A1-vs-A2, B1-vs-B2, B1-vs-B3	GO:0009526//plastid envelope	-	-
	osa-miR396b-5p	LOC_Os04g52040	A1-vs-A2, B1-vs-B2, B1-vs-B3	-	-	-
	osa-miR396b-5p	LOC_Os06g02560	A1-vs-A2, B1-vs-B2, B1-vs-B3	-	-	-
	osa-miR396b-5p	LOC_Os06g28060	A1-vs-A2, B1-vs-B2, B1-vs-B3	GO:0009526//plastid envelope	-	-
	osa-miR396c-5p	LOC_Os08g40230	A1-vs-A2, B1-vs-B2, B1-vs-B3	GO:0043231//intracellular membrane-bounded organelle;GO:0044444//cytoplasmic part	-	-
	osa-miR5793	LOC_Os03g46710	A1-vs-A2, B1-vs-B2, B1-vs-B3	-	GO:0005488//binding	-
	osa-miR164a	LOC_Os01g62660	A1-vs-A2, B1-vs-B2, B1-vs-B3, A1-vs-B1, A1-vs-A3	GO:0043231//intracellular membrane-bounded organelle	GO:0003676//nucleic acid binding;GO:0001071//nucleic acid binding transcription factor activity	GO:0006351//transcription, DNA-dependent
	osa-miR164a	LOC_Os06g46270	A1-vs-A2*, B1-vs-B2, B1-vs-B3*, A1-vs-B1, A1-vs-A3*	-	GO:0003676//nucleic acid binding	-
	osa-miR164b	LOC_Os10g42090	A1-vs-A2, B1-vs-B2, B1-vs-B3, A1-vs-B1	GO:0043231//intracellular membrane-bounded organelle;GO:0043231//intracellular membrane-bounded organelle	-	-
	osa-miR164b	LOC_Os12g41680	A1-vs-A2*, B1-vs-B2, B1-vs-B3, A1-vs-B1	-	GO:0003676//nucleic acid binding	-
	osa-miR164f	LOC_Os10g42090	A1-vs-A2, B1-vs-B2, B1-vs-B3, A1-vs-B1	GO:0043231//intracellular membrane-bounded organelle;GO:0043231//intracellular membrane-bounded organelle	-	-
	osa-miR164f	LOC_Os12g41680	A1-vs-A2*, B1-vs-B2, B1-vs-B3, A1-vs-B1	-	GO:0003676//nucleic acid binding	-
	osa-miR5490	LOC_Os03g23200	A1-vs-A2, B1-vs-B2, B1-vs-B3, A1-vs-B1	-	GO:0004175//endopeptidase activity;GO:0003676//nucleic acid binding;GO:0034061//DNA polymerase activity	GO:0006260//DNA replication;GO:0019538//protein metabolic process
	osa-miR5490	LOC_Os09g35970	A1-vs-A2, B1-vs-B2, B1-vs-B3, A1-vs-B1	GO:0043231//intracellular membrane-bounded organelle	GO:0004091//carboxylesterase activity	GO:0006007//glucose catabolic process
	osa-miR5490	LOC_Os11g16470	A1-vs-A2, B1-vs-B2, B1-vs-B3, A1-vs-B1	GO:0043231//intracellular membrane-bounded organelle;GO:0044444//cytoplasmic part;GO:0043231//intracellular membrane-bounded organelle;GO:0044444//cytoplasmic part;GO:0043231//intracellular membrane-bounded organelle;GO:0044444//cytoplasmic part	-	-
	osa-miR5791	LOC_Os04g37940	A1-vs-A2, B1-vs-B2, B1-vs-B3, A1-vs-B1	GO:0043231//intracellular membrane-bounded organelle	-	-
	osa-miR396a-5p	LOC_Os08g40230	A1-vs-A2, B1-vs-B2, B1-vs-B3, A3-vs-B3	GO:0043231//intracellular membrane-bounded organelle;GO:0044444//cytoplasmic part	-	-
	osa-miR396a-5p	LOC_Os11g19810	A1-vs-A2, B1-vs-B2, B1-vs-B3, A3-vs-B3	-	-	-
	osa-miR396a-5p	LOC_Os11g45410	A1-vs-A2, B1-vs-B2, B1-vs-B3, A3-vs-B3	-	-	-
	osa-miR396b-5p	LOC_Os08g40230	A1-vs-A2, B1-vs-B2, B1-vs-B3, A3-vs-B3	GO:0043231//intracellular membrane-bounded organelle;GO:0044444//cytoplasmic part	-	-
	osa-miR396b-5p	LOC_Os11g19810	A1-vs-A2, B1-vs-B2, B1-vs-B3, A3-vs-B3	-	-	-
	osa-miR396b-5p	LOC_Os11g45410	A1-vs-A2, B1-vs-B2, B1-vs-B3, A3-vs-B3	-	-	-
	osa-miR164a	LOC_Os02g24020	A1-vs-A2, B1-vs-B2, B2-vs-B3, B1-vs-B3, A1-vs-A3	GO:0009536//plastid	GO:0016628//oxidoreductase activity, acting on the CH-CH group of donors, NAD or NADP as acceptor	GO:0009089//lysine biosynthetic process via diaminopimelate
	osa-miR319b	LOC_Os01g59660	A1-vs-A2, B1-vs-B2, B2-vs-B3, B1-vs-B3	GO:0043231//intracellular membrane-bounded organelle;GO:0043231//intracellular membrane-bounded organelle;GO:0043231//intracellular membrane-bounded organelle;GO:0043231//intracellular membrane-bounded organelle	GO:0003676//nucleic acid binding;GO:0003676//nucleic acid binding;GO:0003676//nucleic acid binding;GO:0003676//nucleic acid binding	-
	osa-miR319b	LOC_Os05g44210	A1-vs-A2, B1-vs-B2, B2-vs-B3, B1-vs-B3	-	GO:0035251//UDP-glucosyltransferase activity;GO:0019203//carbohydrate phosphatase activity;GO:0035251//UDP-glucosyltransferase activity;GO:0019203//carbohydrate phosphatase activity	GO:0009756//carbohydrate mediated signaling;GO:0005991//trehalose metabolic process;GO:0007275//multicellular organismal development;GO:0003006//developmental process involved in reproduction;GO:0042546//cell wall biogenesis;GO:0009756//carbohydrate mediated signaling;GO:0005991//trehalose metabolic process;GO:0007275//multicellular organismal development;GO:0003006//developmental process involve…
	osa-miR164a	LOC_Os02g18690	A1-vs-A2*, A1-vs-A3*, B1-vs-B2, B2-vs-B3, B1-vs-B3*, A1-vs-B1	-	-	-
	osa-miR164b	LOC_Os09g37700	A1-vs-A2, B1-vs-B2, B2-vs-B3, B1-vs-B3, A1-vs-B1	-	-	-
	osa-miR164f	LOC_Os09g37700	A1-vs-A2, B1-vs-B2, B2-vs-B3, B1-vs-B3, A1-vs-B1	-	-	-
	osa-miR5497	LOC_Os12g03530	A1-vs-A2, B1-vs-B2, B2-vs-B3, B1-vs-B3*, A1-vs-B1	GO:0031410//cytoplasmic vesicle	GO:0004553//hydrolase activity, hydrolyzing O-glycosyl compounds;GO:0043167//ion binding	GO:0019566//arabinose metabolic process
	osa-miR2867-3p	LOC_Os02g23890	A1-vs-A2, B1-vs-B3	GO:0031224//intrinsic to membrane;GO:0031224//intrinsic to membrane	GO:0022892//substrate-specific transporter activity;GO:0022892//substrate-specific transporter activity	GO:0006810//transport;GO:0006810//transport
	osa-miR2867-3p	LOC_Os12g41240	A1-vs-A2, B1-vs-B3	-	-	-
	osa-miR5161	LOC_Os03g57940	A1-vs-A2, B1-vs-B3	-	GO:0004672//protein kinase activity;GO:0032559//adenyl ribonucleotide binding;GO:0004672//protein kinase activity;GO:0032559//adenyl ribonucleotide binding;GO:0004672//protein kinase activity;GO:0032559//adenyl ribonucleotide binding;GO:0004672//protein kinase activity;GO:0032559//adenyl ribonucleotide binding	GO:0006464//cellular protein modification process;GO:0006464//cellular protein modification process;GO:0006464//cellular protein modification process;GO:0006464//cellular protein modification process
	osa-miR5161	LOC_Os05g47830	A1-vs-A2, B1-vs-B3	GO:0043231//intracellular membrane-bounded organelle	-	-
	osa-miR5161	LOC_Os07g37680	A1-vs-A2, B1-vs-B3	-	-	-
	osa-miR5490	LOC_Os10g12630	A1-vs-A2, B1-vs-B3	-	GO:0004175//endopeptidase activity;GO:0003676//nucleic acid binding;GO:0034061//DNA polymerase activity	GO:0006260//DNA replication;GO:0019538//protein metabolic process
	osa-miR5490	LOC_Os01g37325	A1-vs-A2, B1-vs-B3, A1-vs-B1	GO:0043231//intracellular membrane-bounded organelle	-	-
	osa-miR319b	LOC_Os02g51000	A1-vs-A2, B2-vs-B3	-	-	-
	osa-miR5497	LOC_Os03g31910	A1-vs-A2, B2-vs-B3, B1-vs-B3	-	-	-
	osa-miR160d-3p	LOC_Os01g21380	A1-vs-A2, B2-vs-B3, B1-vs-B3, A2-vs-B2	-	-	-
	osa-miR1319b	LOC_Os11g02379	A1-vs-A3	GO:0043231//intracellular membrane-bounded organelle	-	-
	osa-miR1425-5p	LOC_Os10g35790	A1-vs-A3	GO:0043231//intracellular membrane-bounded organelle	-	-
	osa-miR1432-5p	LOC_Os11g27740	A1-vs-A3	-	-	-
	osa-miR156l-5p	LOC_Os12g28810	A1-vs-A3	GO:0043231//intracellular membrane-bounded organelle	-	-
	osa-miR159f	LOC_Os02g01590	A1-vs-A3*	-	GO:0004558//alpha-glucosidase activity;GO:0004558//alpha-glucosidase activity	GO:0044238//primary metabolic process;GO:0044238//primary metabolic process
	osa-miR160a-3p	LOC_Os04g36830	A1-vs-A3	-	-	-
	osa-miR160a-3p	LOC_Os07g37130	A1-vs-A3	GO:0044464//cell part;GO:0044464//cell part;GO:0044464//cell part	GO:0015932//nucleobase-containing compound transmembrane transporter activity;GO:0015932//nucleobase-containing compound transmembrane transporter activity;GO:0015932//nucleobase-containing compound transmembrane transporter activity	GO:0015931//nucleobase-containing compound transport;GO:0015931//nucleobase-containing compound transport;GO:0015931//nucleobase-containing compound transport
	osa-miR160b-3p	LOC_Os04g36830	A1-vs-A3	-	-	-
	osa-miR160b-3p	LOC_Os07g37130	A1-vs-A3	GO:0044464//cell part;GO:0044464//cell part;GO:0044464//cell part	GO:0015932//nucleobase-containing compound transmembrane transporter activity;GO:0015932//nucleobase-containing compound transmembrane transporter activity;GO:0015932//nucleobase-containing compound transmembrane transporter activity	GO:0015931//nucleobase-containing compound transport;GO:0015931//nucleobase-containing compound transport;GO:0015931//nucleobase-containing compound transport
	osa-miR164a	LOC_Os04g09910	A1-vs-A3	-	-	-
	osa-miR164b	LOC_Os04g09910	A1-vs-A3	-	-	-
	osa-miR164f	LOC_Os04g09910	A1-vs-A3	-	-	-
	osa-miR167e-5p	LOC_Os05g01780	A1-vs-A3*	-	GO:0004672//protein kinase activity;GO:0032559//adenyl ribonucleotide binding;GO:0004672//protein kinase activity	GO:0006464//cellular protein modification process
	osa-miR167e-5p	LOC_Os07g29820	A1-vs-A3	-	GO:0000166//nucleotide binding	-
	osa-miR167e-5p	LOC_Os07g33790	A1-vs-A3	GO:0030313;GO:0031224//intrinsic to membrane;GO:0031410//cytoplasmic vesicle	GO:0008066//glutamate receptor activity;GO:0005231//excitatory extracellular ligand-gated ion channel activity	GO:0007166//cell surface receptor signaling pathway;GO:0006810//transport
	osa-miR167e-5p	LOC_Os07g38580	A1-vs-A3	-	GO:0016788//hydrolase activity, acting on ester bonds;GO:0046914//transition metal ion binding;GO:0005543//phospholipid binding	-
	osa-miR167e-5p	LOC_Os09g39420	A1-vs-A3	GO:0043231//intracellular membrane-bounded organelle	GO:0005488//binding	GO:0006325//chromatin organization;GO:0010629//negative regulation of gene expression
	osa-miR167i-5p	LOC_Os05g01780	A1-vs-A3*	-	GO:0004672//protein kinase activity;GO:0032559//adenyl ribonucleotide binding;GO:0004672//protein kinase activity	GO:0006464//cellular protein modification process
	osa-miR167i-5p	LOC_Os07g29820	A1-vs-A3	-	GO:0000166//nucleotide binding	-
	osa-miR167i-5p	LOC_Os07g33790	A1-vs-A3	GO:0030313;GO:0031224//intrinsic to membrane;GO:0031410//cytoplasmic vesicle	GO:0008066//glutamate receptor activity;GO:0005231//excitatory extracellular ligand-gated ion channel activity	GO:0007166//cell surface receptor signaling pathway;GO:0006810//transport
	osa-miR167i-5p	LOC_Os07g38580	A1-vs-A3	-	GO:0016788//hydrolase activity, acting on ester bonds;GO:0046914//transition metal ion binding;GO:0005543//phospholipid binding	-
	osa-miR167i-5p	LOC_Os09g39420	A1-vs-A3	GO:0043231//intracellular membrane-bounded organelle	GO:0005488//binding	GO:0006325//chromatin organization;GO:0010629//negative regulation of gene expression
	osa-miR171i-3p	LOC_Os06g01620	A1-vs-A3	GO:0043231//intracellular membrane-bounded organelle	-	-
	osa-miR1846e	LOC_Os06g06350	A1-vs-A3	-	-	-
	osa-miR1849	LOC_Os04g59494	A1-vs-A3	-	GO:0022892//substrate-specific transporter activity;GO:0022892//substrate-specific transporter activity;GO:0022892//substrate-specific transporter activity	GO:0015031//protein transport;GO:0015031//protein transport;GO:0015031//protein transport
	osa-miR1863c	LOC_Os06g40360	A1-vs-A3	-	-	-
	osa-miR1871	LOC_Os11g40315	A1-vs-A3	GO:0031410//cytoplasmic vesicle	-	-
	osa-miR2055	LOC_Os04g34000	A1-vs-A3	GO:0009527//plastid outer membrane	GO:0016757//transferase activity, transferring glycosyl groups	GO:0008152//metabolic process
	osa-miR2055	LOC_Os09g12730	A1-vs-A3	-	GO:0005488//binding;GO:0005488//binding	-
	osa-miR2055	LOC_Os09g37240	A1-vs-A3	-	GO:0016740//transferase activity	-
	osa-miR2055	LOC_Os10g34390	A1-vs-A3*	-	-	-
	osa-miR2101-5p	LOC_Os04g18570	A1-vs-A3	GO:0043231//intracellular membrane-bounded organelle	-	-
	osa-miR2101-5p	LOC_Os07g49240	A1-vs-A3	-	-	-
	osa-miR2101-5p	LOC_Os12g02540	A1-vs-A3	GO:0043231//intracellular membrane-bounded organelle	GO:0060089//molecular transducer activity	GO:0023052//signaling;GO:0009314//response to radiation
	osa-miR396e-5p	LOC_Os11g03540	A1-vs-A3	GO:0043231//intracellular membrane-bounded organelle	-	-
	osa-miR396f-5p	LOC_Os11g03540	A1-vs-A3	GO:0043231//intracellular membrane-bounded organelle	-	-
	osa-miR3980a-3p	LOC_Os06g50390	A1-vs-A3	-	GO:0016787//hydrolase activity	-
	osa-miR3980a-5p	LOC_Os01g44950	A1-vs-A3	-	-	-
	osa-miR3980a-5p	LOC_Os01g72260	A1-vs-A3	GO:0031410//cytoplasmic vesicle	GO:0046872//metal ion binding;GO:0016491//oxidoreductase activity	-
	osa-miR3980a-5p	LOC_Os12g38970	A1-vs-A3	-	-	-
	osa-miR3980b-3p	LOC_Os06g50390	A1-vs-A3	-	GO:0016787//hydrolase activity	-
	osa-miR3980b-5p	LOC_Os01g44950	A1-vs-A3	-	-	-
	osa-miR3980b-5p	LOC_Os01g72260	A1-vs-A3	GO:0031410//cytoplasmic vesicle	GO:0046872//metal ion binding;GO:0016491//oxidoreductase activity	-
	osa-miR3980b-5p	LOC_Os12g38970	A1-vs-A3	-	-	-
	osa-miR444b.1	LOC_Os01g16354	A1-vs-A3	-	-	-
	osa-miR444b.1	LOC_Os02g17500	A1-vs-A3	GO:0031224//intrinsic to membrane;GO:0031224//intrinsic to membrane;GO:0031224//intrinsic to membrane	GO:0016628//oxidoreductase activity, acting on the CH-CH group of donors, NAD or NADP as acceptor;GO:0022857//transmembrane transporter activity;GO:0016628//oxidoreductase activity, acting on the CH-CH group of donors, NAD or NADP as acceptor;GO:0022857//transmembrane transporter activity;GO:0016628//oxidoreductase activity, acting on the CH-CH group of donors, NAD or NADP as acceptor;GO:0022857/…	GO:0008152//metabolic process;GO:0071702//organic substance transport;GO:0008152//metabolic process;GO:0071702//organic substance transport;GO:0008152//metabolic process;GO:0071702//organic substance transport
	osa-miR444b.1	LOC_Os02g22370	A1-vs-A3	-	-	-
	osa-miR444b.1	LOC_Os02g36924	A1-vs-A3	GO:0043231//intracellular membrane-bounded organelle	GO:0003677//DNA binding;GO:0001071//nucleic acid binding transcription factor activity;GO:0016628//oxidoreductase activity, acting on the CH-CH group of donors, NAD or NADP as acceptor	GO:0006351//transcription, DNA-dependent
	osa-miR444b.1	LOC_Os05g20460	A1-vs-A3	-	-	-
	osa-miR444c.1	LOC_Os01g16354	A1-vs-A3	-	-	-
	osa-miR444c.1	LOC_Os02g17500	A1-vs-A3	GO:0031224//intrinsic to membrane;GO:0031224//intrinsic to membrane;GO:0031224//intrinsic to membrane	GO:0016628//oxidoreductase activity, acting on the CH-CH group of donors, NAD or NADP as acceptor;GO:0022857//transmembrane transporter activity;GO:0016628//oxidoreductase activity, acting on the CH-CH group of donors, NAD or NADP as acceptor;GO:0022857//transmembrane transporter activity;GO:0016628//oxidoreductase activity, acting on the CH-CH group of donors, NAD or NADP as acceptor;GO:0022857/…	GO:0008152//metabolic process;GO:0071702//organic substance transport;GO:0008152//metabolic process;GO:0071702//organic substance transport;GO:0008152//metabolic process;GO:0071702//organic substance transport
	osa-miR444c.1	LOC_Os02g22370	A1-vs-A3	-	-	-
	osa-miR444c.1	LOC_Os02g36924	A1-vs-A3	GO:0043231//intracellular membrane-bounded organelle	GO:0003677//DNA binding;GO:0001071//nucleic acid binding transcription factor activity;GO:0016628//oxidoreductase activity, acting on the CH-CH group of donors, NAD or NADP as acceptor	GO:0006351//transcription, DNA-dependent
	osa-miR444c.1	LOC_Os05g20460	A1-vs-A3	-	-	-
	osa-miR5144-3p	LOC_Os06g12100	A1-vs-A3	-	-	-
	osa-miR5144-3p	LOC_Os06g45820	A1-vs-A3	GO:0031224//intrinsic to membrane;GO:0031224//intrinsic to membrane;GO:0031224//intrinsic to membrane;GO:0031224//intrinsic to membrane	GO:0004175//endopeptidase activity;GO:0046914//transition metal ion binding;GO:0042623//ATPase activity, coupled;GO:0032559//adenyl ribonucleotide binding;GO:0004175//endopeptidase activity;GO:0046914//transition metal ion binding;GO:0042623//ATPase activity, coupled;GO:0032559//adenyl ribonucleotide binding;GO:0004175//endopeptidase activity;GO:0046914//transition metal ion binding;GO:0042623//A…	GO:0009057//macromolecule catabolic process;GO:0019538//protein metabolic process;GO:0009987//cellular process;GO:0009057//macromolecule catabolic process;GO:0019538//protein metabolic process;GO:0009987//cellular process;GO:0009057//macromolecule catabolic process;GO:0019538//protein metabolic process;GO:0009987//cellular process;GO:0009057//macromolecule catabolic process;GO:0019538//protein me…
	osa-miR5144-3p	LOC_Os10g34590	A1-vs-A3	GO:0043231//intracellular membrane-bounded organelle	-	-
	osa-miR5150-5p	LOC_Os03g17800	A1-vs-A3	GO:0044464//cell part	-	GO:0051234//establishment of localization
	osa-miR5161	LOC_Os08g02550	A1-vs-A3	-	-	-
	osa-miR531a	LOC_Os09g30030	A1-vs-A3	-	-	-
	osa-miR531b	LOC_Os01g23370	A1-vs-A3	GO:0044464//cell part	-	-
	osa-miR531b	LOC_Os01g37760	A1-vs-A3	-	GO:0016639//oxidoreductase activity, acting on the CH-NH2 group of donors, NAD or NADP as acceptor;GO:0016639//oxidoreductase activity, acting on the CH-NH2 group of donors, NAD or NADP as acceptor	GO:0019752//carboxylic acid metabolic process;GO:0019752//carboxylic acid metabolic process
	osa-miR531b	LOC_Os01g40640	A1-vs-A3	GO:0043231//intracellular membrane-bounded organelle;GO:0043231//intracellular membrane-bounded organelle;GO:0043231//intracellular membrane-bounded organelle	GO:0003676//nucleic acid binding	-
	osa-miR531b	LOC_Os01g40950	A1-vs-A3	GO:0031410//cytoplasmic vesicle	-	-
	osa-miR531b	LOC_Os01g51420	A1-vs-A3	-	GO:0046872//metal ion binding	-
	osa-miR531b	LOC_Os01g57030	A1-vs-A3	-	-	-
	osa-miR531b	LOC_Os03g52760	A1-vs-A3	-	GO:0016772//transferase activity, transferring phosphorus-containing groups	GO:0006796//phosphate-containing compound metabolic process
	osa-miR531b	LOC_Os03g58130	A1-vs-A3	-	GO:0015036//disulfide oxidoreductase activity	GO:0018904//ether metabolic process;GO:0019725//cellular homeostasis
	osa-miR531b	LOC_Os03g59720	A1-vs-A3	GO:0043229//intracellular organelle	-	-
	osa-miR531b	LOC_Os03g61780	A1-vs-A3	-	GO:0016798//hydrolase activity, acting on glycosyl bonds;GO:0043167//ion binding;GO:0016798//hydrolase activity, acting on glycosyl bonds;GO:0043167//ion binding	GO:0044238//primary metabolic process;GO:0044238//primary metabolic process
	osa-miR531b	LOC_Os04g32404	A1-vs-A3	-	-	-
	osa-miR531b	LOC_Os04g53340	A1-vs-A3	-	-	-
	osa-miR531b	LOC_Os05g01140	A1-vs-A3	-	-	-
	osa-miR531b	LOC_Os05g41440	A1-vs-A3*	-	GO:0016491//oxidoreductase activity;GO:0005506//iron ion binding;GO:0016491//oxidoreductase activity;GO:0005506//iron ion binding	GO:0008152//metabolic process;GO:0008152//metabolic process
	osa-miR531b	LOC_Os06g08470	A1-vs-A3	-	-	-
	osa-miR531b	LOC_Os07g02120	A1-vs-A3	-	GO:0004497//monooxygenase activity;GO:0050662//coenzyme binding	-
	osa-miR531b	LOC_Os07g29760	A1-vs-A3	GO:0031410//cytoplasmic vesicle	GO:0004175//endopeptidase activity	GO:0019538//protein metabolic process
	osa-miR531b	LOC_Os07g41080	A1-vs-A3	-	-	-
	osa-miR531b	LOC_Os07g48830	A1-vs-A3*	-	GO:0035250//UDP-galactosyltransferase activity;GO:0035250//UDP-galactosyltransferase activity	-
	osa-miR531b	LOC_Os09g30030	A1-vs-A3	-	-	-
	osa-miR531b	LOC_Os11g03070	A1-vs-A3	GO:0016020//membrane	GO:0015078//hydrogen ion transmembrane transporter activity	GO:0006810//transport
	osa-miR531b	LOC_Os11g05520	A1-vs-A3	GO:0031410//cytoplasmic vesicle	-	-
	osa-miR531c	LOC_Os09g30030	A1-vs-A3	-	-	-
	osa-miR5486	LOC_Os08g06800	A1-vs-A3	GO:0043231//intracellular membrane-bounded organelle	GO:0004175//endopeptidase activity;GO:0003676//nucleic acid binding;GO:0034061//DNA polymerase activity	GO:0006260//DNA replication;GO:0019538//protein metabolic process
	osa-miR5501	LOC_Os01g48180	A1-vs-A3	-	-	-
	osa-miR5501	LOC_Os01g65730	A1-vs-A3	GO:0043231//intracellular membrane-bounded organelle	-	-
	osa-miR5501	LOC_Os03g17780	A1-vs-A3	GO:0031461//cullin-RING ubiquitin ligase complex	GO:0005488//binding	-
	osa-miR5501	LOC_Os12g10810	A1-vs-A3	-	-	-
	osa-miR5516a	LOC_Os10g17260	A1-vs-A3	GO:0031410//cytoplasmic vesicle	GO:0016491//oxidoreductase activity;GO:0005506//iron ion binding	GO:0008152//metabolic process
	osa-miR5516a	LOC_Os11g31480	A1-vs-A3	-	GO:0004672//protein kinase activity;GO:0032559//adenyl ribonucleotide binding	-
	osa-miR5516b	LOC_Os10g17260	A1-vs-A3	GO:0031410//cytoplasmic vesicle	GO:0016491//oxidoreductase activity;GO:0005506//iron ion binding	GO:0008152//metabolic process
	osa-miR5516b	LOC_Os11g31480	A1-vs-A3	-	GO:0004672//protein kinase activity;GO:0032559//adenyl ribonucleotide binding	-
	osa-miR5519	LOC_Os03g56904	A1-vs-A3	-	-	-
	osa-miR5536	LOC_Os01g65550	A1-vs-A3	-	GO:0005488//binding;GO:0005488//binding	-
	osa-miR5536	LOC_Os04g52450	A1-vs-A3	GO:0043231//intracellular membrane-bounded organelle;GO:0043231//intracellular membrane-bounded organelle	GO:0048037//cofactor binding;GO:0008483//transaminase activity;GO:0048037//cofactor binding;GO:0008483//transaminase activity	-
	osa-miR5536	LOC_Os05g28970	A1-vs-A3	-	-	-
	osa-miR5536	LOC_Os09g29190	A1-vs-A3	GO:0043231//intracellular membrane-bounded organelle;GO:0043231//intracellular membrane-bounded organelle	GO:0016881//acid-amino acid ligase activity;GO:0032559//adenyl ribonucleotide binding;GO:0016881//acid-amino acid ligase activity;GO:0032559//adenyl ribonucleotide binding	GO:0006163//purine nucleotide metabolic process;GO:0006163//purine nucleotide metabolic process
	osa-miR5791	LOC_Os03g39980	A1-vs-A3	-	-	-
	osa-miR5791	LOC_Os12g11500	A1-vs-A3	GO:0031410//cytoplasmic vesicle	-	-
	osa-miR5791	LOC_Os12g11930	A1-vs-A3	GO:0031410//cytoplasmic vesicle	-	-
	osa-miR5794	LOC_Os02g26814	A1-vs-A3	-	GO:0005488//binding;GO:0016757//transferase activity, transferring glycosyl groups;GO:0005488//binding;GO:0016757//transferase activity, transferring glycosyl groups;GO:0005488//binding;GO:0016757//transferase activity, transferring glycosyl groups;GO:0005488//binding;GO:0016757//transferase activity, transferring glycosyl groups;GO:0005488//binding;GO:0016757//transferase activity, transferring …	GO:0030258//lipid modification;GO:0030258//lipid modification;GO:0030258//lipid modification;GO:0030258//lipid modification;GO:0030258//lipid modification
	osa-miR5794	LOC_Os03g44440	A1-vs-A3	GO:0031224//intrinsic to membrane	GO:0005267//potassium channel activity	GO:0030001//metal ion transport
	osa-miR5794	LOC_Os04g15560	A1-vs-A3	-	-	-
	osa-miR5794	LOC_Os07g08420	A1-vs-A3	GO:0043231//intracellular membrane-bounded organelle	GO:0003676//nucleic acid binding	GO:0006351//transcription, DNA-dependent
	osa-miR5818	LOC_Os12g20169	A1-vs-A3	GO:0043231//intracellular membrane-bounded organelle	-	-
	osa-miR812o-3p	LOC_Os03g12610	A1-vs-A3	GO:0043231//intracellular membrane-bounded organelle;GO:0043231//intracellular membrane-bounded organelle	GO:0003676//nucleic acid binding;GO:0004527//exonuclease activity;GO:0003676//nucleic acid binding;GO:0004527//exonuclease activity	-
	osa-miR812o-3p	LOC_Os06g47910	A1-vs-A3	GO:0031410//cytoplasmic vesicle	GO:0016787//hydrolase activity	-
	osa-miR812o-3p	LOC_Os08g06478	A1-vs-A3	-	-	-
	osa-miR812o-3p	LOC_Os11g37540	A1-vs-A3	-	GO:0004672//protein kinase activity;GO:0016787//hydrolase activity;GO:0032559//adenyl ribonucleotide binding	GO:0006464//cellular protein modification process
	osa-miR812o-3p	LOC_Os12g38210	A1-vs-A3	GO:0043234//protein complex	GO:0019787//small conjugating protein ligase activity	GO:0032446//protein modification by small protein conjugation
	osa-miR812p	LOC_Os03g48380	A1-vs-A3	-	-	-
	osa-miR812v	LOC_Os02g07960	A1-vs-A3	GO:0043231//intracellular membrane-bounded organelle;GO:0044444//cytoplasmic part;GO:0043231//intracellular membrane-bounded organelle;GO:0044444//cytoplasmic part;GO:0043231//intracellular membrane-bounded organelle;GO:0044444//cytoplasmic part	GO:0016301//kinase activity;GO:0032559//adenyl ribonucleotide binding;GO:0016301//kinase activity;GO:0032559//adenyl ribonucleotide binding;GO:0016301//kinase activity;GO:0032559//adenyl ribonucleotide binding	GO:0006464//cellular protein modification process;GO:0006464//cellular protein modification process;GO:0006464//cellular protein modification process
	osa-miR812v	LOC_Os02g53180	A1-vs-A3	-	GO:0003824//catalytic activity;GO:0003824//catalytic activity;GO:0003824//catalytic activity	GO:0008152//metabolic process;GO:0008152//metabolic process;GO:0008152//metabolic process
	osa-miR812v	LOC_Os03g61050	A1-vs-A3	GO:0031410//cytoplasmic vesicle	-	GO:0009555//pollen development
	osa-miR812v	LOC_Os04g54560	A1-vs-A3*	-	GO:0016740//transferase activity	-
	osa-miR812v	LOC_Os06g48320	A1-vs-A3	-	-	-
	osa-miR1432-5p	LOC_Os10g08030	A1-vs-A3, A1-vs-B1	-	-	-
	osa-miR1432-5p	LOC_Os10g36060	A1-vs-A3, A1-vs-B1	GO:0043231//intracellular membrane-bounded organelle	-	-
	osa-miR156l-5p	LOC_Os05g44340	A1-vs-A3*, A1-vs-B1	-	GO:0016462//pyrophosphatase activity;GO:0032559//adenyl ribonucleotide binding	GO:0050896//response to stimulus;GO:0043170//macromolecule metabolic process
	osa-miR162a	LOC_Os03g02970	A1-vs-A3, A1-vs-B1	GO:0016604//nuclear body	GO:0016891//endoribonuclease activity, producing 5'-phosphomonoesters;GO:0032559//adenyl ribonucleotide binding;GO:0003723//RNA binding;GO:0042623//ATPase activity, coupled	GO:0006379//mRNA cleavage;GO:0030422//production of siRNA involved in RNA interference;GO:0009790//embryo development;GO:0035196//production of miRNAs involved in gene silencing by miRNA;GO:0045087//innate immune response;GO:0048316//seed development
	osa-miR162a	LOC_Os07g08500	A1-vs-A3*, A1-vs-B1	GO:0043231//intracellular membrane-bounded organelle	GO:0008757//S-adenosylmethionine-dependent methyltransferase activity;GO:0003676//nucleic acid binding	GO:0032776//DNA methylation on cytosine
	osa-miR162a	LOC_Os07g46490	A1-vs-A3, A1-vs-B1	GO:0044459//plasma membrane part;GO:0042995//cell projection;GO:0044444//cytoplasmic part;GO:0044459//plasma membrane part;GO:0042995//cell projection;GO:0044444//cytoplasmic part	GO:0016307//phosphatidylinositol phosphate kinase activity;GO:0032559//adenyl ribonucleotide binding;GO:0016307//phosphatidylinositol phosphate kinase activity;GO:0032559//adenyl ribonucleotide binding	GO:0016192//vesicle-mediated transport;GO:0046488//phosphatidylinositol metabolic process;GO:0009856//pollination;GO:0009664//plant-type cell wall organization;GO:0000904//cell morphogenesis involved in differentiation;GO:0016192//vesicle-mediated transport;GO:0046488//phosphatidylinositol metabolic process;GO:0009856//pollination;GO:0009664//plant-type cell wall organization;GO:0000904//cell mor…
	osa-miR164a	LOC_Os04g38720	A1-vs-B1	GO:0044464//cell part	-	-
	osa-miR164a	LOC_Os06g06290	A1-vs-B1	GO:0031410//cytoplasmic vesicle	GO:0016787//hydrolase activity	GO:0044238//primary metabolic process
	osa-miR164a	LOC_Os06g23650	A1-vs-B1	-	GO:0003676//nucleic acid binding	-
	osa-miR164a	LOC_Os09g32920	A1-vs-B1	-	-	-
	osa-miR164a	LOC_Os09g38640	A1-vs-B1	-	-	-
	osa-miR171c-5p	LOC_Os01g45650	A1-vs-A3, A1-vs-B1	-	-	GO:0019752//carboxylic acid metabolic process
	osa-miR171c-5p	LOC_Os06g01620	A1-vs-A3, A1-vs-B1	GO:0043231//intracellular membrane-bounded organelle	-	-
	osa-miR1846e	LOC_Os04g59000	A1-vs-A3, A1-vs-B1	-	GO:0031406//carboxylic acid binding;GO:0004672//protein kinase activity;GO:0032559//adenyl ribonucleotide binding	GO:0006464//cellular protein modification process
	osa-miR3980a-3p	LOC_Os01g60760	A1-vs-A3, A1-vs-B1	-	-	-
	osa-miR3980a-3p	LOC_Os05g03920	A1-vs-A3, A1-vs-B1	-	GO:0004672//protein kinase activity;GO:0000166//nucleotide binding	-
	osa-miR3980a-3p	LOC_Os07g42740	A1-vs-A3, A1-vs-B1	-	-	-
	osa-miR3980b-3p	LOC_Os05g03920	A1-vs-A3, A1-vs-B1	-	GO:0004672//protein kinase activity;GO:0000166//nucleotide binding	-
	osa-miR3980b-3p	LOC_Os07g42740	A1-vs-A3, A1-vs-B1	-	-	-
	osa-miR160a-3p	LOC_Os08g43570#	A1-vs-A3*, A2-vs-B2	GO:0031410//cytoplasmic vesicle	GO:0030246//carbohydrate binding;GO:0043167//ion binding;GO:0015925	GO:0044238//primary metabolic process
	osa-miR160a-3p	LOC_Os12g29330	A1-vs-A3, A2-vs-B2	-	-	-
	osa-miR160b-3p	LOC_Os08g43570	A1-vs-A3*, A2-vs-B2	GO:0031410//cytoplasmic vesicle	GO:0030246//carbohydrate binding;GO:0043167//ion binding;GO:0015925	GO:0044238//primary metabolic process
	osa-miR160b-3p	LOC_Os12g29330	A1-vs-A3, A2-vs-B2	-	-	-
	osa-miR531b	LOC_Os01g52214	A1-vs-A3, A2-vs-B2	GO:0043231//intracellular membrane-bounded organelle;GO:0030964	GO:0046914//transition metal ion binding;GO:0051536//iron-sulfur cluster binding;GO:0048037//cofactor binding;GO:0050136//NADH dehydrogenase (quinone) activity	GO:0051234//establishment of localization;GO:0006091//generation of precursor metabolites and energy
	osa-miR531b	LOC_Os01g53910	A1-vs-A3, A2-vs-B2	-	GO:0005488//binding;GO:0016491//oxidoreductase activity	GO:0008152//metabolic process
	osa-miR531b	LOC_Os05g49940	A1-vs-A3, A2-vs-B2	-	-	-
	osa-miR531b	LOC_Os12g13300	A1-vs-A3, A2-vs-B2	GO:0031410//cytoplasmic vesicle	-	-
	osa-miR531c	LOC_Os01g52214	A1-vs-A3, A2-vs-B2	GO:0043231//intracellular membrane-bounded organelle;GO:0030964	GO:0046914//transition metal ion binding;GO:0051536//iron-sulfur cluster binding;GO:0048037//cofactor binding;GO:0050136//NADH dehydrogenase (quinone) activity	GO:0051234//establishment of localization;GO:0006091//generation of precursor metabolites and energy
	osa-miR1846e	LOC_Os01g48339	A1-vs-A3, A3-vs-B3	-	-	-
	osa-miR1846e	LOC_Os04g02530	A1-vs-A3, A3-vs-B3	-	-	-
	osa-miR1846e	LOC_Os06g22980	A1-vs-A3*, A3-vs-B3	GO:0031224//intrinsic to membrane	GO:0016759//cellulose synthase activity	GO:0045229//external encapsulating structure organization;GO:0042546//cell wall biogenesis;GO:0009250//glucan biosynthetic process;GO:0009856//pollination
	osa-miR1846e	LOC_Os08g25710	A1-vs-A3*, A3-vs-B3	GO:0043231//intracellular membrane-bounded organelle;GO:0031224//intrinsic to membrane	GO:0016759//cellulose synthase activity	GO:0045229//external encapsulating structure organization;GO:0042546//cell wall biogenesis;GO:0009250//glucan biosynthetic process;GO:0009856//pollination
	osa-miR5490	LOC_Os04g24350	A1-vs-A3, A3-vs-B3	-	-	-
	osa-miR5490	LOC_Os09g33750	A1-vs-A3, A3-vs-B3	-	-	-
	osa-miR5490	LOC_Os10g02960	A1-vs-A3, A3-vs-B3	-	-	-
	osa-miR5490	LOC_Os10g16900	A1-vs-A3, A3-vs-B3	-	GO:0004175//endopeptidase activity;GO:0003676//nucleic acid binding;GO:0034061//DNA polymerase activity	GO:0006260//DNA replication;GO:0019538//protein metabolic process
	osa-miR812p	LOC_Os02g53180	A1-vs-A3, A3-vs-B3	-	GO:0003824//catalytic activity;GO:0003824//catalytic activity;GO:0003824//catalytic activity	GO:0008152//metabolic process;GO:0008152//metabolic process;GO:0008152//metabolic process
	osa-miR164b	LOC_Os09g07300	A1-vs-A3, B1-vs-B2	GO:0044464//cell part	GO:0046914//transition metal ion binding;GO:0019787//small conjugating protein ligase activity	GO:0009725//response to hormone stimulus;GO:0048281//inflorescence morphogenesis;GO:0060918//auxin transport;GO:0032446//protein modification by small protein conjugation;GO:0009639//response to red or far red light;GO:0048513//organ development
	osa-miR164f	LOC_Os09g07300	A1-vs-A3, B1-vs-B2	GO:0044464//cell part	GO:0046914//transition metal ion binding;GO:0019787//small conjugating protein ligase activity	GO:0009725//response to hormone stimulus;GO:0048281//inflorescence morphogenesis;GO:0060918//auxin transport;GO:0032446//protein modification by small protein conjugation;GO:0009639//response to red or far red light;GO:0048513//organ development
	osa-miR319a-3p	LOC_Os02g02110	A1-vs-A3, B1-vs-B2	GO:0044464//cell part	-	-
	osa-miR319a-3p	LOC_Os03g27120	A1-vs-A3, B1-vs-B2	-	-	-
	osa-miR396e-5p	LOC_Os01g25330	A1-vs-A3, B1-vs-B2	-	GO:0016788//hydrolase activity, acting on ester bonds;GO:0016788//hydrolase activity, acting on ester bonds;GO:0016788//hydrolase activity, acting on ester bonds	GO:0009628//response to abiotic stimulus;GO:0006950//response to stress;GO:0006650//glycerophospholipid metabolic process;GO:0009628//response to abiotic stimulus;GO:0006950//response to stress;GO:0006650//glycerophospholipid metabolic process;GO:0009628//response to abiotic stimulus;GO:0006950//response to stress;GO:0006650//glycerophospholipid metabolic process
	osa-miR5083	LOC_Os02g18090	A1-vs-A3, B1-vs-B2	-	-	-
	osa-miR5802	LOC_Os02g21770	A1-vs-A3, B1-vs-B2	-	-	-
	osa-miR156l-5p	LOC_Os01g57360	A1-vs-A3, B1-vs-B2, A1-vs-B1	GO:0043231//intracellular membrane-bounded organelle	GO:0016747//transferase activity, transferring acyl groups other than amino-acyl groups	-
	osa-miR1432-5p	LOC_Os06g38490	A1-vs-A3, B1-vs-B2, B1-vs-B3	-	-	-
	osa-miR156l-5p	LOC_Os01g22390	A1-vs-A3, B1-vs-B2, B1-vs-B3	-	GO:0016301//kinase activity;GO:0032559//adenyl ribonucleotide binding;GO:0016301//kinase activity;GO:0032559//adenyl ribonucleotide binding	GO:0006464//cellular protein modification process;GO:0006464//cellular protein modification process
	osa-miR156l-5p	LOC_Os08g12430	A1-vs-A3, B1-vs-B2, B1-vs-B3	-	-	-
	osa-miR159a.2	LOC_Os05g50690	A1-vs-A3, B1-vs-B2, B1-vs-B3	GO:0043231//intracellular membrane-bounded organelle	-	-
	osa-miR159f	LOC_Os01g32259	A1-vs-A3, B1-vs-B2, B1-vs-B3	-	-	-
	osa-miR164c	LOC_Os06g46270	A1-vs-A3*, B1-vs-B2, B1-vs-B3*	-	GO:0003676//nucleic acid binding	-
	osa-miR164c	LOC_Os08g10080	A1-vs-A3, B1-vs-B2, B1-vs-B3	-	-	-
	osa-miR166e-3p	LOC_Os03g44835	A1-vs-A3, B1-vs-B2, B1-vs-B3	-	-	-
	osa-miR168a-5p	LOC_Os05g49710	A1-vs-A3, B1-vs-B2, B1-vs-B3	-	-	-
	osa-miR168a-5p	LOC_Os07g41250	A1-vs-A3, B1-vs-B2, B1-vs-B3	GO:0044464//cell part;GO:0044464//cell part	-	GO:0015833//peptide transport;GO:0015833//peptide transport
	osa-miR319a-3p	LOC_Os08g40990	A1-vs-A3*, B1-vs-B2, B1-vs-B3	GO:0031410//cytoplasmic vesicle	-	-
	osa-miR396c-3p	LOC_Os01g06730	A1-vs-A3, B1-vs-B2, B1-vs-B3	GO:0031410//cytoplasmic vesicle	-	-
	osa-miR396c-5p	LOC_Os03g51970	A1-vs-A3, B1-vs-B2, B1-vs-B3	-	-	-
	osa-miR396c-5p	LOC_Os04g56740	A1-vs-A3, B1-vs-B2, B1-vs-B3	-	-	-
	osa-miR396e-5p	LOC_Os03g51970	A1-vs-A3, B1-vs-B2, B1-vs-B3	-	-	-
	osa-miR5817	LOC_Os03g64140	A1-vs-A3, B1-vs-B2, B1-vs-B3	GO:0043231//intracellular membrane-bounded organelle	-	-
	osa-miR5834	LOC_Os03g57280	A1-vs-A3, B1-vs-B2, B1-vs-B3	-	GO:0003676//nucleic acid binding;GO:0008170//N-methyltransferase activity	GO:0006399//tRNA metabolic process
	osa-miR156l-5p	LOC_Os06g44034	A1-vs-A3*, B1-vs-B2, B1-vs-B3*, A1-vs-B1	-	-	-
	osa-miR164a	LOC_Os02g44380	B1-vs-B2, B1-vs-B3, A1-vs-B1	-	-	-
	osa-miR5490	LOC_Os04g48230	A1-vs-A3, B1-vs-B2, B1-vs-B3, A1-vs-B1	-	GO:0016741//transferase activity, transferring one-carbon groups;GO:0016741//transferase activity, transferring one-carbon groups	GO:0006730//one-carbon metabolic process;GO:0006730//one-carbon metabolic process
	osa-miR5506	LOC_Os11g10040	A1-vs-A3, B1-vs-B2, B1-vs-B3, A1-vs-B1	GO:0043231//intracellular membrane-bounded organelle;GO:0043231//intracellular membrane-bounded organelle;GO:0043231//intracellular membrane-bounded organelle	-	-
	osa-miR5791	LOC_Os01g68970	A1-vs-A3, B1-vs-B2, B1-vs-B3, A1-vs-B1	GO:0043231//intracellular membrane-bounded organelle;GO:0043231//intracellular membrane-bounded organelle;GO:0043231//intracellular membrane-bounded organelle	-	-
	osa-miR164b	LOC_Os01g03720	A1-vs-A3, B1-vs-B2, B2-vs-B3, B1-vs-B3	GO:0043231//intracellular membrane-bounded organelle	GO:0003676//nucleic acid binding	-
	osa-miR164f	LOC_Os01g03720	A1-vs-A3, B1-vs-B2, B2-vs-B3, B1-vs-B3	GO:0043231//intracellular membrane-bounded organelle	GO:0003676//nucleic acid binding	-
	osa-miR319b	LOC_Os06g41500	A1-vs-A3, B1-vs-B2, B2-vs-B3, B1-vs-B3	GO:0031410//cytoplasmic vesicle	GO:0005488//binding	-
	osa-miR5834	LOC_Os01g61190	A1-vs-A3, B1-vs-B2, B2-vs-B3, B1-vs-B3	GO:0043234//protein complex;GO:0043231//intracellular membrane-bounded organelle	-	GO:0016192//vesicle-mediated transport
	osa-miR5519	LOC_Os06g05890	A1-vs-A3, B1-vs-B2, B2-vs-B3, B1-vs-B3, A1-vs-B1	GO:0031410//cytoplasmic vesicle	GO:0046914//transition metal ion binding;GO:0003676//nucleic acid binding	-
	osa-miR5834	LOC_Os03g53800	A1-vs-A3, B1-vs-B2, B2-vs-B3, B1-vs-B3, A1-vs-B1	GO:0031410//cytoplasmic vesicle;GO:0031410//cytoplasmic vesicle;GO:0031410//cytoplasmic vesicle;GO:0031410//cytoplasmic vesicle;GO:0031410//cytoplasmic vesicle	GO:0015926//glucosidase activity;GO:0015926//glucosidase activity;GO:0015926//glucosidase activity;GO:0015926//glucosidase activity;GO:0015926//glucosidase activity	GO:0044238//primary metabolic process;GO:0044238//primary metabolic process;GO:0044238//primary metabolic process;GO:0044238//primary metabolic process;GO:0044238//primary metabolic process
	osa-miR166g-3p	LOC_Os02g49670	A1-vs-A3, B1-vs-B3	GO:0043231//intracellular membrane-bounded organelle	-	-
	osa-miR166g-3p	LOC_Os04g58020	A1-vs-A3, B1-vs-B3*	-	-	-
	osa-miR166g-3p	LOC_Os07g39310	A1-vs-A3, B1-vs-B3*	GO:0043231//intracellular membrane-bounded organelle	GO:0046914//transition metal ion binding;GO:0001071//nucleic acid binding transcription factor activity	GO:0006351//transcription, DNA-dependent
	osa-miR166g-3p	LOC_Os08g14990	A1-vs-A3, B1-vs-B3	GO:0031410//cytoplasmic vesicle	-	-
	osa-miR166h-3p	LOC_Os02g49670	A1-vs-A3, B1-vs-B3	GO:0043231//intracellular membrane-bounded organelle	-	-
	osa-miR166h-3p	LOC_Os04g58020	A1-vs-A3, B1-vs-B3*	-	-	-
	osa-miR166h-3p	LOC_Os07g39310	A1-vs-A3*, B1-vs-B3	GO:0043231//intracellular membrane-bounded organelle	GO:0046914//transition metal ion binding;GO:0001071//nucleic acid binding transcription factor activity	GO:0006351//transcription, DNA-dependent
	osa-miR166h-3p	LOC_Os08g14990	A1-vs-A3, B1-vs-B3	GO:0031410//cytoplasmic vesicle	-	-
	osa-miR168a-5p	LOC_Os09g21630	A1-vs-A3, B1-vs-B3	-	-	-
	osa-miR1862e	LOC_Os02g30730	A1-vs-A3, B1-vs-B3	GO:0031981//nuclear lumen;GO:0031981//nuclear lumen	-	GO:0048507//meristem development;GO:0010051//xylem and phloem pattern formation;GO:0048827//phyllome development;GO:0009791//post-embryonic development;GO:0048507//meristem development;GO:0010051//xylem and phloem pattern formation;GO:0048827//phyllome development;GO:0009791//post-embryonic development
	osa-miR1862e	LOC_Os05g03174	A1-vs-A3, B1-vs-B3*	GO:0043231//intracellular membrane-bounded organelle;GO:0043231//intracellular membrane-bounded organelle	-	-
	osa-miR1862e	LOC_Os10g37420	A1-vs-A3, B1-vs-B3	GO:0031090//organelle membrane;GO:0043231//intracellular membrane-bounded organelle;GO:0031224//intrinsic to membrane	GO:0005506//iron ion binding;GO:0005506//iron ion binding	GO:0051234//establishment of localization;GO:0006091//generation of precursor metabolites and energy
	osa-miR396c-3p	LOC_Os08g08030	A1-vs-A3, B1-vs-B3	-	GO:0004518//nuclease activity	GO:0006281//DNA repair
	osa-miR396c-5p	LOC_Os02g45570	A1-vs-A3, B1-vs-B3	-	-	-
	osa-miR396e-5p	LOC_Os02g45570	A1-vs-A3, B1-vs-B3	-	-	-
	osa-miR396f-5p	LOC_Os02g45570	A1-vs-A3, B1-vs-B3	-	-	-
	osa-miR5161	LOC_Os12g35290	A1-vs-A3, B1-vs-B3	-	-	-
	osa-miR5817	LOC_Os01g07940	A1-vs-A3, B1-vs-B3	GO:0031981//nuclear lumen	GO:0004672//protein kinase activity;GO:0032559//adenyl ribonucleotide binding	GO:0006464//cellular protein modification process
	osa-miR7694-3p	LOC_Os07g45780	A1-vs-A3, B1-vs-B3	GO:0044464//cell part	-	-
	osa-miR171c-5p	LOC_Os02g44360	A1-vs-A3, B1-vs-B3*, A3-vs-B3	-	-	-
	osa-miR171c-5p	LOC_Os04g46860	A1-vs-A3, B1-vs-B3, A3-vs-B3	-	-	-
	osa-miR171c-5p	LOC_Os10g40390	A1-vs-A3, B1-vs-B3, A3-vs-B3	-	-	-
	osa-miR159a.2	LOC_Os03g02240	A1-vs-A3, B2-vs-B3	GO:0043231//intracellular membrane-bounded organelle	GO:0003677//DNA binding	GO:0016049//cell growth;GO:0009414//response to water deprivation;GO:0010374//stomatal complex development;GO:0010375//stomatal complex patterning;GO:0010948;GO:0000904//cell morphogenesis involved in differentiation
	osa-miR164a	LOC_Os08g38340	B2-vs-B3	-	-	-
	osa-miR319a-3p	LOC_Os01g16110	A1-vs-A3, B2-vs-B3	GO:0044424//intracellular part;GO:0044424//intracellular part	-	-
	osa-miR164a	LOC_Os12g05260	B2-vs-B3, A1-vs-B1	-	-	-
	osa-miR160d-3p	LOC_Os02g10530	A1-vs-A3*, B2-vs-B3, B1-vs-B3	-	-	-
	osa-miR164a	LOC_Os02g36880	B2-vs-B3, B1-vs-B3, A1-vs-B1	GO:0043231//intracellular membrane-bounded organelle;GO:0043231//intracellular membrane-bounded organelle;GO:0043231//intracellular membrane-bounded organelle;GO:0043231//intracellular membrane-bounded organelle	GO:0003676//nucleic acid binding;GO:0003676//nucleic acid binding;GO:0003676//nucleic acid binding;GO:0003676//nucleic acid binding	-
	osa-miR164a	LOC_Os04g40970	B2-vs-B3, B1-vs-B3, A1-vs-B1	GO:0043231//intracellular membrane-bounded organelle	GO:0042623//ATPase activity, coupled;GO:0032559//adenyl ribonucleotide binding	GO:0006259//DNA metabolic process;GO:0009414//response to water deprivation
	osa-miR164b	LOC_Os04g19260	A1-vs-A3, B2-vs-B3, B1-vs-B3, A1-vs-B1	-	GO:0003676//nucleic acid binding;GO:0034061//DNA polymerase activity	GO:0006260//DNA replication
	osa-miR164f	LOC_Os04g19260	A1-vs-A3, B2-vs-B3, B1-vs-B3, A1-vs-B1	-	GO:0003676//nucleic acid binding;GO:0034061//DNA polymerase activity	GO:0006260//DNA replication
	osa-miR156l-5p	LOC_Os01g69830	A1-vs-B1	-	-	-
	osa-miR156l-5p	LOC_Os06g49010	A1-vs-B1	-	-	-
	osa-miR156l-5p	LOC_Os07g02550	A1-vs-B1	-	-	-
	osa-miR156l-5p	LOC_Os07g32170	A1-vs-B1	GO:0043231//intracellular membrane-bounded organelle;GO:0043231//intracellular membrane-bounded organelle	GO:0003676//nucleic acid binding;GO:0003676//nucleic acid binding	-
	osa-miR156l-5p	LOC_Os07g35840	A1-vs-B1	GO:0043231//intracellular membrane-bounded organelle	-	-
	osa-miR162a	LOC_Os02g18090	A1-vs-B1	-	-	-
	osa-miR162a	LOC_Os05g03000	A1-vs-B1	GO:0009534//chloroplast thylakoid;GO:0016020//membrane;GO:0009534//chloroplast thylakoid;GO:0016020//membrane	-	GO:0009668//plastid membrane organization;GO:0009668//plastid membrane organization
	osa-miR164b	LOC_Os04g38720	A1-vs-B1	GO:0044464//cell part	-	-
	osa-miR164b	LOC_Os06g06290	A1-vs-B1	GO:0031410//cytoplasmic vesicle	GO:0016787//hydrolase activity	GO:0044238//primary metabolic process
	osa-miR164b	LOC_Os06g23650	A1-vs-B1	-	GO:0003676//nucleic acid binding	-
	osa-miR164b	LOC_Os09g32920	A1-vs-B1	-	-	-
	osa-miR164b	LOC_Os09g38640	A1-vs-B1	-	-	-
	osa-miR164f	LOC_Os04g38720	A1-vs-B1	GO:0044464//cell part	-	-
	osa-miR164f	LOC_Os06g06290	A1-vs-B1	GO:0031410//cytoplasmic vesicle	GO:0016787//hydrolase activity	GO:0044238//primary metabolic process
	osa-miR164f	LOC_Os06g23650	A1-vs-B1	-	GO:0003676//nucleic acid binding	-
	osa-miR164f	LOC_Os09g32920	A1-vs-B1	-	-	-
	osa-miR164f	LOC_Os09g38640	A1-vs-B1	-	-	-
	osa-miR166k-5p	LOC_Os12g40650	A1-vs-B1	-	GO:0016787//hydrolase activity	-
	osa-miR167a-3p	LOC_Os06g43630	A1-vs-B1	-	GO:0035251//UDP-glucosyltransferase activity	GO:0005984//disaccharide metabolic process
	osa-miR172a	LOC_Os06g49700	A1-vs-B1	-	-	-
	osa-miR172a	LOC_Os11g24130	A1-vs-B1	GO:0043231//intracellular membrane-bounded organelle	-	-
	osa-miR172d-3p	LOC_Os06g49700	A1-vs-B1	-	-	-
	osa-miR172d-3p	LOC_Os11g24130	A1-vs-B1	GO:0043231//intracellular membrane-bounded organelle	-	-
	osa-miR1846a-5p	LOC_Os01g16310	A1-vs-B1	GO:0043231//intracellular membrane-bounded organelle	GO:0016798//hydrolase activity, acting on glycosyl bonds	GO:0008152//metabolic process
	osa-miR1846a-5p	LOC_Os02g18870	A1-vs-B1	-	GO:0016787//hydrolase activity	GO:0044238//primary metabolic process
	osa-miR1846a-5p	LOC_Os04g41900	A1-vs-B1	-	-	-
	osa-miR1846a-5p	LOC_Os06g13050	A1-vs-B1	GO:0009526//plastid envelope	-	-
	osa-miR1846b-5p	LOC_Os01g16310	A1-vs-B1	GO:0043231//intracellular membrane-bounded organelle	GO:0016798//hydrolase activity, acting on glycosyl bonds	GO:0008152//metabolic process
	osa-miR1846b-5p	LOC_Os02g18870	A1-vs-B1	-	GO:0016787//hydrolase activity	GO:0044238//primary metabolic process
	osa-miR1846b-5p	LOC_Os04g41900	A1-vs-B1	-	-	-
	osa-miR1846b-5p	LOC_Os06g13050	A1-vs-B1	GO:0009526//plastid envelope	-	-
	osa-miR1846e	LOC_Os01g62480	A1-vs-B1	GO:0005576//extracellular region;GO:0031410//cytoplasmic vesicle	GO:0046914//transition metal ion binding;GO:0016682//oxidoreductase activity, acting on diphenols and related substances as donors, oxygen as acceptor	GO:0009808//lignin metabolic process
	osa-miR1846e	LOC_Os01g70100	A1-vs-B1	GO:0044464//cell part	GO:0003824//catalytic activity;GO:0046914//transition metal ion binding	-
	osa-miR1846e	LOC_Os03g61290	A1-vs-B1	GO:0031224//intrinsic to membrane	GO:0015078//hydrogen ion transmembrane transporter activity	GO:0006811//ion transport
	osa-miR1846e	LOC_Os08g23630	A1-vs-B1	GO:0043231//intracellular membrane-bounded organelle	GO:0003676//nucleic acid binding;GO:0016891//endoribonuclease activity, producing 5'-phosphomonoesters;GO:0034061//DNA polymerase activity	GO:0006260//DNA replication
	osa-miR1847.1	LOC_Os03g52770	A1-vs-B1	GO:0043231//intracellular membrane-bounded organelle	-	-
	osa-miR1847.1	LOC_Os08g21760	A1-vs-B1	GO:0031224//intrinsic to membrane	-	-
	osa-miR1850.2	LOC_Os03g55590	A1-vs-B1	-	-	-
	osa-miR1850.2	LOC_Os04g44710	A1-vs-B1	GO:0044464//cell part;GO:0044464//cell part	GO:0003723//RNA binding;GO:0003723//RNA binding	-
	osa-miR1850.2	LOC_Os08g21350	A1-vs-B1	-	-	-
	osa-miR1850.2	LOC_Os12g16720	A1-vs-B1	-	GO:0004497//monooxygenase activity;GO:0005506//iron ion binding	GO:0008152//metabolic process
	osa-miR1852	LOC_Os07g31270	A1-vs-B1	GO:0031410//cytoplasmic vesicle	GO:0016813//hydrolase activity, acting on carbon-nitrogen (but not peptide) bonds, in linear amidines;GO:0001071//nucleic acid binding transcription factor activity	GO:0006351//transcription, DNA-dependent;GO:0000255//allantoin metabolic process
	osa-miR1852	LOC_Os08g35210	A1-vs-B1	GO:0043231//intracellular membrane-bounded organelle;GO:0016020//membrane	GO:0046872//metal ion binding;GO:0016491//oxidoreductase activity	-
	osa-miR1883a	LOC_Os10g04290	A1-vs-B1	GO:0043231//intracellular membrane-bounded organelle	-	-
	osa-miR2093-3p	LOC_Os03g52794	A1-vs-B1	-	GO:0005488//binding;GO:0016772//transferase activity, transferring phosphorus-containing groups	GO:0006796//phosphate-containing compound metabolic process
	osa-miR2093-3p	LOC_Os11g06370	A1-vs-B1	GO:0044464//cell part	-	-
	osa-miR3980a-3p	LOC_Os01g04250	A1-vs-B1	-	-	-
	osa-miR3980a-3p	LOC_Os01g48320	A1-vs-B1	-	GO:0003676//nucleic acid binding	-
	osa-miR3980a-3p	LOC_Os02g49880	A1-vs-B1	-	-	-
	osa-miR3980a-3p	LOC_Os03g64150	A1-vs-B1	GO:0044464//cell part	GO:0022857//transmembrane transporter activity	-
	osa-miR3980a-3p	LOC_Os04g02820	A1-vs-B1	-	GO:0017111//nucleoside-triphosphatase activity;GO:0008135//translation factor activity, nucleic acid binding;GO:0032561//guanyl ribonucleotide binding;GO:0017111//nucleoside-triphosphatase activity;GO:0008135//translation factor activity, nucleic acid binding;GO:0032561//guanyl ribonucleotide binding;GO:0017111//nucleoside-triphosphatase activity;GO:0008135//translation factor activity, nucleic a…	GO:0006412//translation;GO:0009207//purine ribonucleoside triphosphate catabolic process;GO:0006412//translation;GO:0009207//purine ribonucleoside triphosphate catabolic process;GO:0006412//translation;GO:0009207//purine ribonucleoside triphosphate catabolic process
	osa-miR3980a-3p	LOC_Os07g45120	A1-vs-B1	-	-	-
	osa-miR3980a-3p	LOC_Os08g34900	A1-vs-B1	-	GO:0016788//hydrolase activity, acting on ester bonds	GO:0071555//cell wall organization
	osa-miR3980a-3p	LOC_Os08g35860	A1-vs-B1	-	GO:0016645//oxidoreductase activity, acting on the CH-NH group of donors;GO:0050662//coenzyme binding	GO:0009690//cytokinin metabolic process
	osa-miR3980a-3p	LOC_Os09g34930	A1-vs-B1	GO:0031410//cytoplasmic vesicle	GO:0016747//transferase activity, transferring acyl groups other than amino-acyl groups	GO:0006629//lipid metabolic process
	osa-miR3980a-3p	LOC_Os10g40390	A1-vs-B1	-	-	-
	osa-miR3980a-3p	LOC_Os11g39260	A1-vs-B1	-	GO:0000166//nucleotide binding	-
	osa-miR3980b-3p	LOC_Os01g04250	A1-vs-B1	-	-	-
	osa-miR3980b-3p	LOC_Os01g48320	A1-vs-B1	-	GO:0003676//nucleic acid binding	-
	osa-miR3980b-3p	LOC_Os02g49880	A1-vs-B1	-	-	-
	osa-miR3980b-3p	LOC_Os03g64150	A1-vs-B1	GO:0044464//cell part	GO:0022857//transmembrane transporter activity	-
	osa-miR3980b-3p	LOC_Os04g02820	A1-vs-B1	-	GO:0017111//nucleoside-triphosphatase activity;GO:0008135//translation factor activity, nucleic acid binding;GO:0032561//guanyl ribonucleotide binding;GO:0017111//nucleoside-triphosphatase activity;GO:0008135//translation factor activity, nucleic acid binding;GO:0032561//guanyl ribonucleotide binding;GO:0017111//nucleoside-triphosphatase activity;GO:0008135//translation factor activity, nucleic a…	GO:0006412//translation;GO:0009207//purine ribonucleoside triphosphate catabolic process;GO:0006412//translation;GO:0009207//purine ribonucleoside triphosphate catabolic process;GO:0006412//translation;GO:0009207//purine ribonucleoside triphosphate catabolic process
	osa-miR3980b-3p	LOC_Os07g45120	A1-vs-B1	-	-	-
	osa-miR3980b-3p	LOC_Os08g34900	A1-vs-B1	-	GO:0016788//hydrolase activity, acting on ester bonds	GO:0071555//cell wall organization
	osa-miR3980b-3p	LOC_Os08g35860	A1-vs-B1	-	GO:0016645//oxidoreductase activity, acting on the CH-NH group of donors;GO:0050662//coenzyme binding	GO:0009690//cytokinin metabolic process
	osa-miR3980b-3p	LOC_Os09g34930	A1-vs-B1	GO:0031410//cytoplasmic vesicle	GO:0016747//transferase activity, transferring acyl groups other than amino-acyl groups	GO:0006629//lipid metabolic process
	osa-miR3980b-3p	LOC_Os10g40390	A1-vs-B1	-	-	-
	osa-miR3980b-3p	LOC_Os11g39260	A1-vs-B1	-	GO:0000166//nucleotide binding	-
	osa-miR444d.3	LOC_Os03g04970	A1-vs-B1	GO:0043231//intracellular membrane-bounded organelle	GO:0005515//protein binding;GO:0032559//adenyl ribonucleotide binding	GO:0006457//protein folding;GO:0050896//response to stimulus
	osa-miR444d.3	LOC_Os04g40850	A1-vs-B1	GO:0043234//protein complex;GO:0043234//protein complex	-	-
	osa-miR444d.3	LOC_Os08g33710	A1-vs-B1	GO:0031410//cytoplasmic vesicle	GO:0016892//endoribonuclease activity, producing 3'-phosphomonoesters;GO:0003676//nucleic acid binding	-
	osa-miR444d.3	LOC_Os08g39240	A1-vs-B1	GO:0031410//cytoplasmic vesicle;GO:0031410//cytoplasmic vesicle	GO:0046872//metal ion binding;GO:0004672//protein kinase activity;GO:0032559//adenyl ribonucleotide binding;GO:0046872//metal ion binding;GO:0004672//protein kinase activity;GO:0032559//adenyl ribonucleotide binding	GO:0006464//cellular protein modification process;GO:0006464//cellular protein modification process
	osa-miR5074	LOC_Os06g05260	A1-vs-B1	GO:0031410//cytoplasmic vesicle	GO:0016837//carbon-oxygen lyase activity, acting on polysaccharides	-
	osa-miR5179	LOC_Os04g18980	A1-vs-B1	-	GO:0003676//nucleic acid binding;GO:0034061//DNA polymerase activity	GO:0006260//DNA replication
	osa-miR5490	LOC_Os01g09050	A1-vs-B1	-	-	-
	osa-miR5490	LOC_Os04g04120	A1-vs-B1	-	-	-
	osa-miR5490	LOC_Os07g14250	A1-vs-B1	-	-	-
	osa-miR5490	LOC_Os08g12190	A1-vs-B1	-	GO:0004175//endopeptidase activity;GO:0003676//nucleic acid binding;GO:0034061//DNA polymerase activity	GO:0006260//DNA replication;GO:0019538//protein metabolic process
	osa-miR5490	LOC_Os08g38660	A1-vs-B1	-	-	-
	osa-miR5504	LOC_Os01g53350	A1-vs-B1	-	GO:0016757//transferase activity, transferring glycosyl groups;GO:0016757//transferase activity, transferring glycosyl groups	-
	osa-miR5521	LOC_Os01g68560	A1-vs-B1	-	-	-
	osa-miR5797	LOC_Os07g49480	A1-vs-B1	GO:0043231//intracellular membrane-bounded organelle;GO:0043231//intracellular membrane-bounded organelle	-	-
	osa-miR5800	LOC_Os01g04580	A1-vs-B1	-	GO:0004672//protein kinase activity;GO:0000166//nucleotide binding	-
	osa-miR5800	LOC_Os10g37580	A1-vs-B1	-	-	-
	osa-miR5806	LOC_Os01g29390	A1-vs-B1	GO:0044464//cell part;GO:0044464//cell part	-	-
	osa-miR5818	LOC_Os01g48760	A1-vs-B1	-	-	GO:0051234//establishment of localization;GO:0051234//establishment of localization
	osa-miR5836	LOC_Os01g63060	A1-vs-B1	GO:0044464//cell part	-	-
	osa-miR5836	LOC_Os02g20560	A1-vs-B1	GO:0031410//cytoplasmic vesicle	-	-
	osa-miR5836	LOC_Os05g04520	A1-vs-B1	-	GO:0004702//receptor signaling protein serine/threonine kinase activity;GO:0032559//adenyl ribonucleotide binding	GO:0006464//cellular protein modification process
	osa-miR5836	LOC_Os05g21180	A1-vs-B1	GO:0044464//cell part;GO:0044464//cell part;GO:0044464//cell part;GO:0044464//cell part	-	-
	osa-miR5836	LOC_Os07g01520	A1-vs-B1	GO:0044464//cell part	-	-
	osa-miR814b	LOC_Os07g11790	A1-vs-B1	-	-	-
	osa-miR5519	LOC_Os04g50720	A1-vs-B1, A2-vs-B2	-	-	-
	osa-miR171c-5p	LOC_Os03g04300	A1-vs-B1, A3-vs-B3	GO:0043231//intracellular membrane-bounded organelle;GO:0009536//plastid;GO:0043231//intracellular membrane-bounded organelle	GO:0005488//binding	-
	osa-miR1846e	LOC_Os02g04100	A1-vs-B1, A3-vs-B3	GO:0005839//proteasome core complex;GO:0043231//intracellular membrane-bounded organelle;GO:0016020//membrane	GO:0004175//endopeptidase activity	GO:0010035//response to inorganic substance;GO:0019941//modification-dependent protein catabolic process
	osa-miR1846e	LOC_Os02g52190	A1-vs-B1, A3-vs-B3	GO:0043231//intracellular membrane-bounded organelle	-	-
	osa-miR1846e	LOC_Os12g36890	A1-vs-B1, A3-vs-B3	GO:0031224//intrinsic to membrane;GO:0043231//intracellular membrane-bounded organelle	GO:0016759//cellulose synthase activity	GO:0045229//external encapsulating structure organization;GO:0009250//glucan biosynthetic process;GO:0006970//response to osmotic stress;GO:0048513//organ development;GO:0042546//cell wall biogenesis
	osa-miR1425-5p	LOC_Os10g35230	A2-vs-A3	-	-	-
	osa-miR1425-5p	LOC_Os10g35640	A2-vs-A3	GO:0043231//intracellular membrane-bounded organelle	-	-
	osa-miR159a.1	LOC_Os04g46384	A2-vs-A3	GO:0043231//intracellular membrane-bounded organelle	GO:0003676//nucleic acid binding;GO:0001071//nucleic acid binding transcription factor activity	GO:0006351//transcription, DNA-dependent;GO:0003006//developmental process involved in reproduction
	osa-miR159a.1	LOC_Os05g34640	A2-vs-A3	-	GO:0046914//transition metal ion binding;GO:0003676//nucleic acid binding	GO:0006351//transcription, DNA-dependent
	osa-miR159b	LOC_Os04g46384	A2-vs-A3	GO:0043231//intracellular membrane-bounded organelle	GO:0003676//nucleic acid binding;GO:0001071//nucleic acid binding transcription factor activity	GO:0006351//transcription, DNA-dependent;GO:0003006//developmental process involved in reproduction
	osa-miR159b	LOC_Os05g34640	A2-vs-A3	-	GO:0046914//transition metal ion binding;GO:0003676//nucleic acid binding	GO:0006351//transcription, DNA-dependent
	osa-miR169b	LOC_Os01g41650	A2-vs-A3	-	-	-
	osa-miR169b	LOC_Os02g18064	A2-vs-A3*	-	-	-
	osa-miR169b	LOC_Os02g53620	A2-vs-A3	GO:0031410//cytoplasmic vesicle	-	-
	osa-miR169b	LOC_Os03g07880	A2-vs-A3*	GO:0005667//transcription factor complex;GO:0031410//cytoplasmic vesicle;GO:0005667//transcription factor complex;GO:0031410//cytoplasmic vesicle;GO:0005667//transcription factor complex;GO:0031410//cytoplasmic vesicle	GO:0003676//nucleic acid binding;GO:0001071//nucleic acid binding transcription factor activity;GO:0003676//nucleic acid binding;GO:0001071//nucleic acid binding transcription factor activity;GO:0003676//nucleic acid binding;GO:0001071//nucleic acid binding transcription factor activity	GO:0006351//transcription, DNA-dependent;GO:0006351//transcription, DNA-dependent;GO:0006351//transcription, DNA-dependent
	osa-miR169b	LOC_Os03g29760	A2-vs-A3*	-	-	-
	osa-miR169b	LOC_Os04g51370	A2-vs-A3	GO:0043231//intracellular membrane-bounded organelle;GO:0043231//intracellular membrane-bounded organelle	-	-
	osa-miR169b	LOC_Os05g51190	A2-vs-A3	-	GO:0004672//protein kinase activity;GO:0004672//protein kinase activity;GO:0004672//protein kinase activity;GO:0004672//protein kinase activity	-
	osa-miR169b	LOC_Os07g06470	A2-vs-A3	-	-	-
	osa-miR169b	LOC_Os07g06740	A2-vs-A3	-	GO:0046872//metal ion binding;GO:0004674//protein serine/threonine kinase activity;GO:0032559//adenyl ribonucleotide binding;GO:0046872//metal ion binding;GO:0004674//protein serine/threonine kinase activity;GO:0032559//adenyl ribonucleotide binding;GO:0046872//metal ion binding;GO:0004672//protein kinase activity;GO:0032559//adenyl ribonucleotide binding	GO:0006464//cellular protein modification process;GO:0006464//cellular protein modification process;GO:0006464//cellular protein modification process
	osa-miR169b	LOC_Os07g41720	A2-vs-A3*	-	-	-
	osa-miR169b	LOC_Os12g42400	A2-vs-A3	-	-	-
	osa-miR169c	LOC_Os01g41650	A2-vs-A3	-	-	-
	osa-miR169c	LOC_Os02g18064	A2-vs-A3*	-	-	-
	osa-miR169c	LOC_Os02g53620	A2-vs-A3	GO:0031410//cytoplasmic vesicle	-	-
	osa-miR169c	LOC_Os03g07880	A2-vs-A3	GO:0005667//transcription factor complex;GO:0031410//cytoplasmic vesicle;GO:0005667//transcription factor complex;GO:0031410//cytoplasmic vesicle;GO:0005667//transcription factor complex;GO:0031410//cytoplasmic vesicle	GO:0003676//nucleic acid binding;GO:0001071//nucleic acid binding transcription factor activity;GO:0003676//nucleic acid binding;GO:0001071//nucleic acid binding transcription factor activity;GO:0003676//nucleic acid binding;GO:0001071//nucleic acid binding transcription factor activity	GO:0006351//transcription, DNA-dependent;GO:0006351//transcription, DNA-dependent;GO:0006351//transcription, DNA-dependent
	osa-miR169c	LOC_Os03g29760	A2-vs-A3	-	-	-
	osa-miR169c	LOC_Os04g51370	A2-vs-A3	GO:0043231//intracellular membrane-bounded organelle;GO:0043231//intracellular membrane-bounded organelle	-	-
	osa-miR169c	LOC_Os05g51190	A2-vs-A3	-	GO:0004672//protein kinase activity;GO:0004672//protein kinase activity;GO:0004672//protein kinase activity;GO:0004672//protein kinase activity	-
	osa-miR169c	LOC_Os07g06470	A2-vs-A3	-	-	-
	osa-miR169c	LOC_Os07g06740	A2-vs-A3	-	GO:0046872//metal ion binding;GO:0004674//protein serine/threonine kinase activity;GO:0032559//adenyl ribonucleotide binding;GO:0046872//metal ion binding;GO:0004674//protein serine/threonine kinase activity;GO:0032559//adenyl ribonucleotide binding;GO:0046872//metal ion binding;GO:0004672//protein kinase activity;GO:0032559//adenyl ribonucleotide binding	GO:0006464//cellular protein modification process;GO:0006464//cellular protein modification process;GO:0006464//cellular protein modification process
	osa-miR169c	LOC_Os07g41720	A2-vs-A3	-	-	-
	osa-miR169c	LOC_Os12g42400	A2-vs-A3	-	-	-
	osa-miR1862d	LOC_Os02g30730	A2-vs-A3	GO:0031981//nuclear lumen;GO:0031981//nuclear lumen	-	GO:0048507//meristem development;GO:0010051//xylem and phloem pattern formation;GO:0048827//phyllome development;GO:0009791//post-embryonic development;GO:0048507//meristem development;GO:0010051//xylem and phloem pattern formation;GO:0048827//phyllome development;GO:0009791//post-embryonic development
	osa-miR1862d	LOC_Os02g39070	A2-vs-A3	GO:0031410//cytoplasmic vesicle;GO:0031410//cytoplasmic vesicle	-	-
	osa-miR1862d	LOC_Os05g37910	A2-vs-A3	GO:0044464//cell part;GO:0044464//cell part	-	-
	osa-miR2118b	LOC_Os01g05600	A2-vs-A3	-	-	-
	osa-miR2118b	LOC_Os01g05620	A2-vs-A3	-	-	-
	osa-miR2118b	LOC_Os01g20720	A2-vs-A3	-	-	-
	osa-miR2118b	LOC_Os04g30690	A2-vs-A3	-	-	-
	osa-miR2118n	LOC_Os01g05600	A2-vs-A3	-	-	-
	osa-miR2118n	LOC_Os01g20720	A2-vs-A3	-	-	-
	osa-miR2118n	LOC_Os04g30690	A2-vs-A3	-	-	-
	osa-miR2867-3p	LOC_Os01g49360	A2-vs-A3	GO:0044464//cell part	GO:0016491//oxidoreductase activity	-
	osa-miR2867-3p	LOC_Os06g46910	A2-vs-A3	-	-	-
	osa-miR2873b	LOC_Os01g41650	A2-vs-A3	-	-	-
	osa-miR2873b	LOC_Os03g53650	A2-vs-A3	GO:0044424//intracellular part;GO:0044424//intracellular part;GO:0044424//intracellular part;GO:0044424//intracellular part	GO:0016835//carbon-oxygen lyase activity;GO:0016765//transferase activity, transferring alkyl or aryl (other than methyl) groups;GO:0048037//cofactor binding;GO:0016835//carbon-oxygen lyase activity;GO:0016765//transferase activity, transferring alkyl or aryl (other than methyl) groups;GO:0048037//cofactor binding;GO:0016835//carbon-oxygen lyase activity;GO:0016765//transferase activity, transfer…	GO:0006563//L-serine metabolic process;GO:0000097//sulfur amino acid biosynthetic process;GO:0006563//L-serine metabolic process;GO:0000097//sulfur amino acid biosynthetic process;GO:0006563//L-serine metabolic process;GO:0000097//sulfur amino acid biosynthetic process;GO:0006563//L-serine metabolic process;GO:0000097//sulfur amino acid biosynthetic process
	osa-miR2873b	LOC_Os06g36830	A2-vs-A3	-	GO:0016835//carbon-oxygen lyase activity	GO:0019752//carboxylic acid metabolic process
	osa-miR3980a-3p	LOC_Os01g69240	A2-vs-A3	-	-	-
	osa-miR3980a-3p	LOC_Os03g31400	A2-vs-A3	GO:0043234//protein complex	GO:0004842//ubiquitin-protein ligase activity	GO:0019941//modification-dependent protein catabolic process;GO:0032446//protein modification by small protein conjugation
	osa-miR3980a-3p	LOC_Os06g17260	A2-vs-A3	-	-	-
	osa-miR3980a-3p	LOC_Os11g01320	A2-vs-A3	-	-	-
	osa-miR3980b-3p	LOC_Os01g69240	A2-vs-A3	-	-	-
	osa-miR3980b-3p	LOC_Os03g31400	A2-vs-A3	GO:0043234//protein complex	GO:0004842//ubiquitin-protein ligase activity	GO:0019941//modification-dependent protein catabolic process;GO:0032446//protein modification by small protein conjugation
	osa-miR3980b-3p	LOC_Os06g17260	A2-vs-A3	-	-	-
	osa-miR3980b-3p	LOC_Os11g01320	A2-vs-A3	-	-	-
	osa-miR444f	LOC_Os01g44990	A2-vs-A3	-	-	-
	osa-miR444f	LOC_Os02g43519	A2-vs-A3	-	-	-
	osa-miR5144-3p	LOC_Os01g61980	A2-vs-A3	-	-	-
	osa-miR5150-3p	LOC_Os01g70260	A2-vs-A3	GO:0016020//membrane;GO:0031410//cytoplasmic vesicle;GO:0016020//membrane;GO:0031410//cytoplasmic vesicle	GO:0016301//kinase activity;GO:0005102//receptor binding;GO:0019899//enzyme binding;GO:0016301//kinase activity;GO:0005102//receptor binding;GO:0019899//enzyme binding	GO:0009908//flower development;GO:0044237//cellular metabolic process;GO:0010015//root morphogenesis;GO:0044238//primary metabolic process;GO:0050789//regulation of biological process;GO:0010073//meristem maintenance;GO:0009908//flower development;GO:0044237//cellular metabolic process;GO:0010015//root morphogenesis;GO:0044238//primary metabolic process;GO:0050789//regulation of biological proces…
	osa-miR5150-3p	LOC_Os12g40950	A2-vs-A3	-	-	-
	osa-miR531a	LOC_Os03g13460	A2-vs-A3	-	-	-
	osa-miR531a	LOC_Os10g42110	A2-vs-A3	GO:0016020//membrane	GO:0004871//signal transducer activity;GO:0004672//protein kinase activity;GO:0032559//adenyl ribonucleotide binding	GO:0006464//cellular protein modification process;GO:0043401//steroid hormone mediated signaling pathway
	osa-miR531b	LOC_Os01g73460	A2-vs-A3	GO:0043231//intracellular membrane-bounded organelle	GO:0046914//transition metal ion binding;GO:0008168//methyltransferase activity	GO:0032259//methylation
	osa-miR531b	LOC_Os02g52160	A2-vs-A3	GO:0044464//cell part	-	-
	osa-miR531b	LOC_Os03g12730	A2-vs-A3	GO:0031410//cytoplasmic vesicle	-	-
	osa-miR531b	LOC_Os03g13460	A2-vs-A3	-	-	-
	osa-miR531b	LOC_Os03g18810	A2-vs-A3	GO:0043231//intracellular membrane-bounded organelle	GO:0048037//cofactor binding;GO:0008483//transaminase activity	GO:0008152//metabolic process
	osa-miR531b	LOC_Os03g63660	A2-vs-A3	-	-	-
	osa-miR531b	LOC_Os04g31710	A2-vs-A3	-	-	-
	osa-miR531b	LOC_Os04g45370	A2-vs-A3	GO:0043231//intracellular membrane-bounded organelle	-	-
	osa-miR531b	LOC_Os06g36680	A2-vs-A3	GO:0043231//intracellular membrane-bounded organelle	-	-
	osa-miR531b	LOC_Os08g03600	A2-vs-A3	GO:0044464//cell part	GO:0008324//cation transmembrane transporter activity	GO:0006812//cation transport
	osa-miR531b	LOC_Os09g37650	A2-vs-A3	-	-	-
	osa-miR531c	LOC_Os03g13460	A2-vs-A3	-	-	-
	osa-miR531c	LOC_Os10g42110	A2-vs-A3	GO:0016020//membrane	GO:0004871//signal transducer activity;GO:0004672//protein kinase activity;GO:0032559//adenyl ribonucleotide binding	GO:0006464//cellular protein modification process;GO:0043401//steroid hormone mediated signaling pathway
	osa-miR812k	LOC_Os02g53180	A2-vs-A3	-	GO:0003824//catalytic activity;GO:0003824//catalytic activity;GO:0003824//catalytic activity	GO:0008152//metabolic process;GO:0008152//metabolic process;GO:0008152//metabolic process
	osa-miR812k	LOC_Os03g48380	A2-vs-A3	-	-	-
	osa-miR812l	LOC_Os02g53180	A2-vs-A3	-	GO:0003824//catalytic activity;GO:0003824//catalytic activity;GO:0003824//catalytic activity	GO:0008152//metabolic process;GO:0008152//metabolic process;GO:0008152//metabolic process
	osa-miR812l	LOC_Os03g48380	A2-vs-A3	-	-	-
	osa-miR812m	LOC_Os02g53180	A2-vs-A3	-	GO:0003824//catalytic activity;GO:0003824//catalytic activity;GO:0003824//catalytic activity	GO:0008152//metabolic process;GO:0008152//metabolic process;GO:0008152//metabolic process
	osa-miR812m	LOC_Os03g48380	A2-vs-A3	-	-	-
	osa-miR164c	LOC_Os03g52010	A2-vs-A3, A1-vs-A3	GO:0031410//cytoplasmic vesicle	GO:0008374//O-acyltransferase activity	GO:0044238//primary metabolic process
	osa-miR3980a-3p	LOC_Os01g15580	A2-vs-A3, A1-vs-A3	-	GO:0032559//adenyl ribonucleotide binding	GO:0012501//programmed cell death;GO:0006950//response to stress
	osa-miR3980a-3p	LOC_Os01g29150	A2-vs-A3, A1-vs-A3	-	GO:0016491//oxidoreductase activity;GO:0005506//iron ion binding	GO:0008152//metabolic process
	osa-miR3980a-3p	LOC_Os03g23960	A2-vs-A3, A1-vs-A3	-	-	-
	osa-miR3980b-3p	LOC_Os01g15580	A2-vs-A3, A1-vs-A3	-	GO:0032559//adenyl ribonucleotide binding	GO:0012501//programmed cell death;GO:0006950//response to stress
	osa-miR3980b-3p	LOC_Os01g29150	A2-vs-A3, A1-vs-A3	-	GO:0016491//oxidoreductase activity;GO:0005506//iron ion binding	GO:0008152//metabolic process
	osa-miR3980b-3p	LOC_Os03g23960	A2-vs-A3, A1-vs-A3	-	-	-
	osa-miR5144-3p	LOC_Os01g10530	A2-vs-A3, A1-vs-A3	GO:0043231//intracellular membrane-bounded organelle	-	-
	osa-miR5144-3p	LOC_Os02g12790	A2-vs-A3, A1-vs-A3	-	-	-
	osa-miR5144-3p	LOC_Os05g40990	A2-vs-A3, A1-vs-A3	GO:0031410//cytoplasmic vesicle	GO:0016653//oxidoreductase activity, acting on NAD(P)H, heme protein as acceptor	GO:0008152//metabolic process
	osa-miR5144-3p	LOC_Os08g17570	A2-vs-A3, A1-vs-A3	-	-	-
	osa-miR5150-5p	LOC_Os10g28610	A2-vs-A3, A1-vs-A3	-	-	-
	osa-miR5485	LOC_Os07g14150	A2-vs-A3, A1-vs-A3	-	GO:0016814//hydrolase activity, acting on carbon-nitrogen (but not peptide) bonds, in cyclic amidines;GO:0046914//transition metal ion binding;GO:0016814//hydrolase activity, acting on carbon-nitrogen (but not peptide) bonds, in cyclic amidines;GO:0046914//transition metal ion binding;GO:0016787//hydrolase activity;GO:0016814//hydrolase activity, acting on carbon-nitrogen (but not peptide) bonds,…	-
	osa-miR5485	LOC_Os10g42830	A2-vs-A3, A1-vs-A3	GO:0031090//organelle membrane;GO:0031224//intrinsic to membrane	GO:0022891//substrate-specific transmembrane transporter activity;GO:0016628//oxidoreductase activity, acting on the CH-CH group of donors, NAD or NADP as acceptor	GO:0008152//metabolic process;GO:0071702//organic substance transport
	osa-miR5485	LOC_Os12g13670	A2-vs-A3, A1-vs-A3	-	-	-
	osa-miR5487	LOC_Os04g58760	A2-vs-A3, A1-vs-A3	GO:0016020//membrane	-	-
	osa-miR7694-3p	LOC_Os03g17920	A2-vs-A3, A1-vs-A3	-	GO:0016866//intramolecular transferase activity	GO:0009451//RNA modification
	osa-miR812k	LOC_Os03g50620	A2-vs-A3, A1-vs-A3	-	GO:0005488//binding;GO:0005488//binding	-
	osa-miR812k	LOC_Os04g33720	A2-vs-A3, A1-vs-A3	GO:0031410//cytoplasmic vesicle	GO:0004558//alpha-glucosidase activity	GO:0044238//primary metabolic process
	osa-miR812k	LOC_Os06g38210	A2-vs-A3, A1-vs-A3	GO:0044464//cell part;GO:0044464//cell part	-	-
	osa-miR812k	LOC_Os06g50146	A2-vs-A3, A1-vs-A3	-	-	-
	osa-miR812l	LOC_Os03g50620	A2-vs-A3, A1-vs-A3	-	GO:0005488//binding;GO:0005488//binding	-
	osa-miR812l	LOC_Os04g33720	A2-vs-A3, A1-vs-A3	GO:0031410//cytoplasmic vesicle	GO:0004558//alpha-glucosidase activity	GO:0044238//primary metabolic process
	osa-miR812l	LOC_Os06g38210	A2-vs-A3, A1-vs-A3	GO:0044464//cell part;GO:0044464//cell part	-	-
	osa-miR812l	LOC_Os06g50146	A2-vs-A3, A1-vs-A3	-	-	-
	osa-miR812m	LOC_Os03g50620	A2-vs-A3, A1-vs-A3	-	GO:0005488//binding;GO:0005488//binding	-
	osa-miR812m	LOC_Os04g33720	A2-vs-A3, A1-vs-A3	GO:0031410//cytoplasmic vesicle	GO:0004558//alpha-glucosidase activity	GO:0044238//primary metabolic process
	osa-miR812m	LOC_Os06g38210	A2-vs-A3, A1-vs-A3	GO:0044464//cell part;GO:0044464//cell part	-	-
	osa-miR812m	LOC_Os06g50146	A2-vs-A3, A1-vs-A3	-	-	-
	osa-miR812p	LOC_Os02g07960	A2-vs-A3, A1-vs-A3	GO:0043231//intracellular membrane-bounded organelle;GO:0044444//cytoplasmic part;GO:0043231//intracellular membrane-bounded organelle;GO:0044444//cytoplasmic part;GO:0043231//intracellular membrane-bounded organelle;GO:0044444//cytoplasmic part	GO:0016301//kinase activity;GO:0032559//adenyl ribonucleotide binding;GO:0016301//kinase activity;GO:0032559//adenyl ribonucleotide binding;GO:0016301//kinase activity;GO:0032559//adenyl ribonucleotide binding	GO:0006464//cellular protein modification process;GO:0006464//cellular protein modification process;GO:0006464//cellular protein modification process
	osa-miR3980a-3p	LOC_Os01g65500	A2-vs-A3, A1-vs-A3, A1-vs-B1	-	-	-
	osa-miR3980a-3p	LOC_Os02g03750	A2-vs-A3, A1-vs-A3, A1-vs-B1	GO:0043231//intracellular membrane-bounded organelle	GO:0004553//hydrolase activity, hydrolyzing O-glycosyl compounds	GO:0044238//primary metabolic process
	osa-miR3980a-3p	LOC_Os03g12270	A2-vs-A3, A1-vs-A3, A1-vs-B1	-	GO:0005488//binding;GO:0003824//catalytic activity	-
	osa-miR3980a-3p	LOC_Os04g15920	A2-vs-A3, A1-vs-A3, A1-vs-B1	-	GO:0016491//oxidoreductase activity;GO:0046914//transition metal ion binding	GO:0008152//metabolic process
	osa-miR3980a-3p	LOC_Os04g36800	A2-vs-A3, A1-vs-A3, A1-vs-B1	GO:0009536//plastid;GO:0009536//plastid	GO:0004312//fatty acid synthase activity;GO:0004312//fatty acid synthase activity	GO:0006631//fatty acid metabolic process;GO:0006631//fatty acid metabolic process
	osa-miR3980a-3p	LOC_Os05g39400	A2-vs-A3, A1-vs-A3, A1-vs-B1	-	-	-
	osa-miR3980a-3p	LOC_Os08g42020	A2-vs-A3, A1-vs-A3, A1-vs-B1	-	-	GO:0006351//transcription, DNA-dependent;GO:0006351//transcription, DNA-dependent
	osa-miR3980a-3p	LOC_Os11g03160	A2-vs-A3*, A1-vs-A3*, A1-vs-B1	GO:0043231//intracellular membrane-bounded organelle	GO:0016740//transferase activity	-
	osa-miR3980b-3p	LOC_Os01g60760	A2-vs-A3, A1-vs-A3, A1-vs-B1	-	-	-
	osa-miR3980b-3p	LOC_Os01g65500	A2-vs-A3, A1-vs-A3, A1-vs-B1	-	-	-
	osa-miR3980b-3p	LOC_Os02g03750	A2-vs-A3, A1-vs-A3, A1-vs-B1	GO:0043231//intracellular membrane-bounded organelle	GO:0004553//hydrolase activity, hydrolyzing O-glycosyl compounds	GO:0044238//primary metabolic process
	osa-miR3980b-3p	LOC_Os03g12270	A2-vs-A3, A1-vs-A3, A1-vs-B1	-	GO:0005488//binding;GO:0003824//catalytic activity	-
	osa-miR3980b-3p	LOC_Os04g15920	A2-vs-A3, A1-vs-A3, A1-vs-B1	-	GO:0016491//oxidoreductase activity;GO:0046914//transition metal ion binding	GO:0008152//metabolic process
	osa-miR3980b-3p	LOC_Os04g36800	A2-vs-A3, A1-vs-A3, A1-vs-B1	GO:0009536//plastid;GO:0009536//plastid	GO:0004312//fatty acid synthase activity;GO:0004312//fatty acid synthase activity	GO:0006631//fatty acid metabolic process;GO:0006631//fatty acid metabolic process
	osa-miR3980b-3p	LOC_Os05g39400	A2-vs-A3, A1-vs-A3, A1-vs-B1	-	-	-
	osa-miR3980b-3p	LOC_Os08g42020	A2-vs-A3, A1-vs-A3, A1-vs-B1	-	-	GO:0006351//transcription, DNA-dependent;GO:0006351//transcription, DNA-dependent
	osa-miR3980b-3p	LOC_Os11g03160	A2-vs-A3, A1-vs-A3*, A1-vs-B1	GO:0043231//intracellular membrane-bounded organelle	GO:0016740//transferase activity	-
	osa-miR5485	LOC_Os01g21860	A2-vs-A3, A1-vs-A3, A3-vs-B3	-	-	-
	osa-miR5485	LOC_Os03g30890	A2-vs-A3, A1-vs-A3, A3-vs-B3	GO:0031410//cytoplasmic vesicle;GO:0031410//cytoplasmic vesicle	GO:0030246//carbohydrate binding;GO:0004672//protein kinase activity;GO:0032559//adenyl ribonucleotide binding;GO:0030246//carbohydrate binding;GO:0004672//protein kinase activity;GO:0032559//adenyl ribonucleotide binding	GO:0006464//cellular protein modification process;GO:0008037//cell recognition;GO:0006464//cellular protein modification process;GO:0008037//cell recognition
	osa-miR5485	LOC_Os05g48590	A2-vs-A3, A1-vs-A3*, A3-vs-B3	GO:0043231//intracellular membrane-bounded organelle	GO:0005515//protein binding	GO:0009755//hormone-mediated signaling pathway;GO:0006412//translation
	osa-miR812p	LOC_Os03g12610	A2-vs-A3, A1-vs-A3, A3-vs-B3	GO:0043231//intracellular membrane-bounded organelle;GO:0043231//intracellular membrane-bounded organelle	GO:0003676//nucleic acid binding;GO:0004527//exonuclease activity;GO:0003676//nucleic acid binding;GO:0004527//exonuclease activity	-
	osa-miR164c	LOC_Os01g62660	A2-vs-A3, A1-vs-A3, B1-vs-B2, B1-vs-B3	GO:0043231//intracellular membrane-bounded organelle	GO:0003676//nucleic acid binding;GO:0001071//nucleic acid binding transcription factor activity	GO:0006351//transcription, DNA-dependent
	osa-miR171i-3p	LOC_Os02g44360	A2-vs-A3, A1-vs-A3, B1-vs-B2, B1-vs-B3*	-	-	-
	osa-miR171i-3p	LOC_Os04g46860	A2-vs-A3, A1-vs-A3, B1-vs-B2, B1-vs-B3	-	-	-
	osa-miR164c	LOC_Os02g18690	A2-vs-A3, A1-vs-A3*, B1-vs-B2, B2-vs-B3, B1-vs-B3*	-	-	-
	osa-miR164c	LOC_Os02g24020	A2-vs-A3, A1-vs-A3, B1-vs-B2, B2-vs-B3, B1-vs-B3	GO:0009536//plastid	GO:0016628//oxidoreductase activity, acting on the CH-CH group of donors, NAD or NADP as acceptor	GO:0009089//lysine biosynthetic process via diaminopimelate
	osa-miR164c	LOC_Os04g38540	A2-vs-A3*, A1-vs-A3*, B1-vs-B2*, B2-vs-B3, B1-vs-B3*	GO:0031410//cytoplasmic vesicle;GO:0031410//cytoplasmic vesicle	GO:0003824//catalytic activity;GO:0005488//binding;GO:0003824//catalytic activity;GO:0005488//binding	GO:0005996//monosaccharide metabolic process;GO:0005996//monosaccharide metabolic process
	osa-miR172a	LOC_Os01g52120	A2-vs-A3, A1-vs-A3, B1-vs-B2, B2-vs-B3, B1-vs-B3	GO:0043231//intracellular membrane-bounded organelle	-	-
	osa-miR172d-3p	LOC_Os01g52120	A2-vs-A3, A1-vs-A3, B1-vs-B2, B2-vs-B3, B1-vs-B3	GO:0043231//intracellular membrane-bounded organelle	-	-
	osa-miR5497	LOC_Os06g10280	A2-vs-A3, A1-vs-A3, B1-vs-B2, B2-vs-B3, B1-vs-B3	GO:0043231//intracellular membrane-bounded organelle	GO:0016772//transferase activity, transferring phosphorus-containing groups	GO:0006644//phospholipid metabolic process
	osa-miR172a	LOC_Os09g09980	A2-vs-A3, A1-vs-A3, B1-vs-B2, B2-vs-B3, B1-vs-B3, A1-vs-B1	GO:0031410//cytoplasmic vesicle	GO:0043167//ion binding;GO:0008422//beta-glucosidase activity	GO:0044238//primary metabolic process
	osa-miR172d-3p	LOC_Os09g09980	A2-vs-A3, A1-vs-A3, B1-vs-B2, B2-vs-B3, B1-vs-B3, A1-vs-B1	GO:0031410//cytoplasmic vesicle	GO:0043167//ion binding;GO:0008422//beta-glucosidase activity	GO:0044238//primary metabolic process
	osa-miR5506	LOC_Os04g33200	A2-vs-A3*, A1-vs-A3, B1-vs-B2, B2-vs-B3*, B1-vs-B3*, A1-vs-B1	GO:0044464//cell part;GO:0044464//cell part	-	-
	osa-miR5506	LOC_Os07g46130	A2-vs-A3, A1-vs-A3, B1-vs-B2, B2-vs-B3, B1-vs-B3, A1-vs-B1	GO:0044464//cell part	-	-
	osa-miR5793	LOC_Os05g50950	A2-vs-A3, A1-vs-A3, B1-vs-B2, B2-vs-B3, B1-vs-B3, A1-vs-B1	-	-	-
	osa-miR171i-3p	LOC_Os10g40390	A2-vs-A3, A1-vs-A3, B1-vs-B3	-	-	-
	osa-miR172a	LOC_Os07g13600	A2-vs-A3, A1-vs-A3, B2-vs-B3, B1-vs-B3	-	-	GO:0003006//developmental process involved in reproduction
	osa-miR172d-3p	LOC_Os07g13600	A2-vs-A3, A1-vs-A3, B2-vs-B3, B1-vs-B3	-	-	GO:0003006//developmental process involved in reproduction
	osa-miR5806	LOC_Os04g22870	A2-vs-A3, A1-vs-A3, B2-vs-B3, B1-vs-B3	-	GO:0004518//nuclease activity	GO:0006399//tRNA metabolic process
	osa-miR172a	LOC_Os02g38494	A2-vs-A3, A1-vs-A3, B2-vs-B3, B1-vs-B3, A1-vs-B1	-	-	-
	osa-miR172d-3p	LOC_Os02g38494	A2-vs-A3, A1-vs-A3, B2-vs-B3, B1-vs-B3, A1-vs-B1	-	-	-
	osa-miR3980a-3p	LOC_Os03g38230	A2-vs-A3, A1-vs-B1	GO:0031224//intrinsic to membrane;GO:0009528//plastid inner membrane	GO:0004175//endopeptidase activity	GO:0019538//protein metabolic process;GO:0009657//plastid organization
	osa-miR3980b-3p	LOC_Os03g38230	A2-vs-A3, A1-vs-B1	GO:0031224//intrinsic to membrane;GO:0009528//plastid inner membrane	GO:0004175//endopeptidase activity	GO:0019538//protein metabolic process;GO:0009657//plastid organization
	osa-miR2873b	LOC_Os09g09870	A2-vs-A3, A2-vs-B2	-	-	-
	osa-miR2873b	LOC_Os09g39462	A2-vs-A3, A2-vs-B2	-	-	-
	osa-miR444f	LOC_Os01g55560	A2-vs-A3*, A2-vs-B2*	-	-	-
	osa-miR444f	LOC_Os04g36058	A2-vs-A3, A2-vs-B2	-	-	-
	osa-miR444f	LOC_Os05g07300	A2-vs-A3, A2-vs-B2	GO:0031410//cytoplasmic vesicle;GO:0031410//cytoplasmic vesicle	-	-
	osa-miR444f	LOC_Os08g06510	A2-vs-A3, A2-vs-B2	GO:0043231//intracellular membrane-bounded organelle	-	-
	osa-miR531a	LOC_Os01g03030	A2-vs-A3, A2-vs-B2	-	GO:0005488//binding;GO:0016876//ligase activity, forming aminoacyl-tRNA and related compounds;GO:0000166//nucleotide binding	GO:0044260//cellular macromolecule metabolic process;GO:0044238//primary metabolic process;GO:0006412//translation;GO:0043039//tRNA aminoacylation
	osa-miR531a	LOC_Os01g52214	A1-vs-A3, A2-vs-B2	GO:0043231//intracellular membrane-bounded organelle;GO:0030964	GO:0046914//transition metal ion binding;GO:0051536//iron-sulfur cluster binding;GO:0048037//cofactor binding;GO:0050136//NADH dehydrogenase (quinone) activity	GO:0051234//establishment of localization;GO:0006091//generation of precursor metabolites and energy
	osa-miR531a	LOC_Os04g55240	A2-vs-A3, A2-vs-B2	-	-	-
	osa-miR531b	LOC_Os01g03030	A2-vs-A3, A2-vs-B2	-	GO:0005488//binding;GO:0016876//ligase activity, forming aminoacyl-tRNA and related compounds;GO:0000166//nucleotide binding	GO:0044260//cellular macromolecule metabolic process;GO:0044238//primary metabolic process;GO:0006412//translation;GO:0043039//tRNA aminoacylation
	osa-miR531b	LOC_Os01g08220	A2-vs-A3, A2-vs-B2	-	GO:0016491//oxidoreductase activity	GO:0016101//diterpenoid metabolic process
	osa-miR531b	LOC_Os01g10180	A2-vs-A3, A2-vs-B2	GO:0043231//intracellular membrane-bounded organelle	-	-
	osa-miR531b	LOC_Os01g54570	A2-vs-A3, A2-vs-B2	-	-	-
	osa-miR531b	LOC_Os02g42720	A2-vs-A3, A2-vs-B2	-	-	-
	osa-miR531b	LOC_Os02g51390	A2-vs-A3, A2-vs-B2	-	-	-
	osa-miR531b	LOC_Os03g04580	A2-vs-A3, A2-vs-B2	GO:0043231//intracellular membrane-bounded organelle	-	-
	osa-miR531b	LOC_Os03g17180	A2-vs-A3, A2-vs-B2	GO:0031224//intrinsic to membrane	GO:0017111//nucleoside-triphosphatase activity;GO:0015405//P-P-bond-hydrolysis-driven transmembrane transporter activity;GO:0032559//adenyl ribonucleotide binding	GO:0006810//transport;GO:0009207//purine ribonucleoside triphosphate catabolic process
	osa-miR531b	LOC_Os04g55240	A2-vs-A3, A2-vs-B2	-	-	-
	osa-miR531b	LOC_Os05g49210	A2-vs-A3, A2-vs-B2	-	-	-
	osa-miR531b	LOC_Os06g32720	A2-vs-A3, A2-vs-B2	GO:0043231//intracellular membrane-bounded organelle	-	-
	osa-miR531b	LOC_Os06g35460	A2-vs-A3, A2-vs-B2	-	-	-
	osa-miR531b	LOC_Os07g05740	A2-vs-A3, A2-vs-B2	GO:0016020//membrane;GO:0031410//cytoplasmic vesicle;GO:0016020//membrane;GO:0031410//cytoplasmic vesicle	GO:0004672//protein kinase activity;GO:0032559//adenyl ribonucleotide binding;GO:0004672//protein kinase activity;GO:0032559//adenyl ribonucleotide binding	GO:0006464//cellular protein modification process;GO:0006464//cellular protein modification process
	osa-miR531b	LOC_Os07g10150	A2-vs-A3, A2-vs-B2	GO:0030120//vesicle coat	-	GO:0015031//protein transport
	osa-miR531b	LOC_Os08g12830	A2-vs-A3*, A2-vs-B2	-	GO:0003824//catalytic activity	-
	osa-miR531b	LOC_Os08g21541	A2-vs-A3, A2-vs-B2	-	-	-
	osa-miR531b	LOC_Os10g17940	A2-vs-A3, A2-vs-B2	-	-	-
	osa-miR531b	LOC_Os10g32070	A2-vs-A3, A2-vs-B2	-	-	-
	osa-miR531b	LOC_Os11g33180	A2-vs-A3, A2-vs-B2	GO:0031410//cytoplasmic vesicle	-	-
	osa-miR531b	LOC_Os12g17210	A2-vs-A3, A2-vs-B2	-	-	-
	osa-miR531c	LOC_Os01g03030	A2-vs-A3, A2-vs-B2	-	GO:0005488//binding;GO:0016876//ligase activity, forming aminoacyl-tRNA and related compounds;GO:0000166//nucleotide binding	GO:0044260//cellular macromolecule metabolic process;GO:0044238//primary metabolic process;GO:0006412//translation;GO:0043039//tRNA aminoacylation
	osa-miR531c	LOC_Os04g55240	A2-vs-A3, A2-vs-B2	-	-	-
	osa-miR5150-3p	LOC_Os02g13560	A2-vs-A3, A3-vs-B3	GO:0016020//membrane;GO:0016020//membrane;GO:0016020//membrane;GO:0016020//membrane	GO:0016491//oxidoreductase activity;GO:0005215//transporter activity;GO:0016491//oxidoreductase activity;GO:0005215//transporter activity;GO:0016491//oxidoreductase activity;GO:0005215//transporter activity;GO:0016491//oxidoreductase activity;GO:0005215//transporter activity	GO:0006810//transport;GO:0006810//transport;GO:0006810//transport;GO:0006810//transport
	osa-miR5150-3p	LOC_Os12g13660	A2-vs-A3, A3-vs-B3	-	-	-
	osa-miR159a.1	LOC_Os03g31490	A2-vs-A3, B1-vs-B2	-	GO:0016787//hydrolase activity	-
	osa-miR159b	LOC_Os03g31490	A2-vs-A3, B1-vs-B2	-	GO:0016787//hydrolase activity	-
	osa-miR5150-3p	LOC_Os02g30920	A2-vs-A3, B1-vs-B2	-	-	-
	osa-miR166h-5p	LOC_Os04g47520	A2-vs-A3, B1-vs-B2, B1-vs-B3, A1-vs-B1	GO:0043231//intracellular membrane-bounded organelle;GO:0043231//intracellular membrane-bounded organelle;GO:0043231//intracellular membrane-bounded organelle	-	-
	osa-miR172a	LOC_Os02g12440	A2-vs-A3, B1-vs-B2, B1-vs-B3, A1-vs-B1	GO:0043231//intracellular membrane-bounded organelle	-	-
	osa-miR172d-3p	LOC_Os02g12440	A2-vs-A3, B1-vs-B2, B1-vs-B3, A1-vs-B1	GO:0043231//intracellular membrane-bounded organelle	-	-
	osa-miR5806	LOC_Os02g26670	A2-vs-A3, B1-vs-B2, B1-vs-B3, A1-vs-B1	-	-	-
	osa-miR164c	LOC_Os12g17430	A2-vs-A3, B1-vs-B2, B2-vs-B3, B1-vs-B3	-	-	-
	osa-miR172a	LOC_Os06g49500	A2-vs-A3, B1-vs-B2, B2-vs-B3, B1-vs-B3, A1-vs-B1	GO:0044464//cell part;GO:0044464//cell part;GO:0044464//cell part	-	-
	osa-miR172d-3p	LOC_Os06g49500	A2-vs-A3, B1-vs-B2, B2-vs-B3, B1-vs-B3, A1-vs-B1	GO:0044464//cell part;GO:0044464//cell part;GO:0044464//cell part	-	-
	osa-miR5506	LOC_Os01g58270	A2-vs-A3, B1-vs-B2, B2-vs-B3, B1-vs-B3, A1-vs-B1	GO:0031410//cytoplasmic vesicle	GO:0004175//endopeptidase activity;GO:0005515//protein binding	GO:0019538//protein metabolic process;GO:0044092//negative regulation of molecular function
	osa-miR160a-5p	LOC_Os04g28470	A2-vs-A3, B1-vs-B2, B2-vs-B3, B1-vs-B3, A2-vs-B2	GO:0043231//intracellular membrane-bounded organelle	-	-
	osa-miR160b-5p	LOC_Os04g28470	A2-vs-A3, B1-vs-B2, B2-vs-B3, B1-vs-B3, A2-vs-B2	GO:0043231//intracellular membrane-bounded organelle	-	-
	osa-miR160c-5p	LOC_Os04g28470	A2-vs-A3, B1-vs-B2, B2-vs-B3, B1-vs-B3, A2-vs-B2	GO:0043231//intracellular membrane-bounded organelle	-	-
	osa-miR160d-5p	LOC_Os04g28470	A2-vs-A3, B1-vs-B2, B2-vs-B3, B1-vs-B3, A2-vs-B2	GO:0043231//intracellular membrane-bounded organelle	-	-
	osa-miR160e-5p	LOC_Os08g41460	A2-vs-A3, B1-vs-B3, A2-vs-B2	GO:0043231//intracellular membrane-bounded organelle;GO:0043231//intracellular membrane-bounded organelle;GO:0043231//intracellular membrane-bounded organelle;GO:0009534//chloroplast thylakoid;GO:0009534//chloroplast thylakoid;GO:0009534//chloroplast thylakoid;GO:0009534//chloroplast thylakoid;GO:0009534//chloroplast thylakoid	-	GO:0009767//photosynthetic electron transport chain;GO:0009767//photosynthetic electron transport chain;GO:0009767//photosynthetic electron transport chain;GO:0009767//photosynthetic electron transport chain;GO:0009767//photosynthetic electron transport chain
	osa-miR164c	LOC_Os12g05260	A2-vs-A3, B2-vs-B3	-	-	-
	osa-miR5793	LOC_Os01g62460	A2-vs-A3, B2-vs-B3	-	-	-
	osa-miR160a-5p	LOC_Os04g59430	A2-vs-A3, B2-vs-B3, A2-vs-B2	GO:0043231//intracellular membrane-bounded organelle	-	-
	osa-miR160b-5p	LOC_Os04g59430	A2-vs-A3, B2-vs-B3, A2-vs-B2	GO:0043231//intracellular membrane-bounded organelle	-	-
	osa-miR160c-5p	LOC_Os04g59430	A2-vs-A3, B2-vs-B3, A2-vs-B2	GO:0043231//intracellular membrane-bounded organelle	-	-
	osa-miR160d-5p	LOC_Os04g59430	A2-vs-A3, B2-vs-B3, A2-vs-B2	GO:0043231//intracellular membrane-bounded organelle	-	-
	osa-miR160e-5p	LOC_Os04g59430	A2-vs-A3, B2-vs-B3, A2-vs-B2	GO:0043231//intracellular membrane-bounded organelle	-	-
	osa-miR172a	LOC_Os03g60430	A2-vs-A3, B2-vs-B3, B1-vs-B3, A1-vs-B1	-	-	GO:0006351//transcription, DNA-dependent;GO:0006351//transcription, DNA-dependent
	osa-miR172d-3p	LOC_Os03g60430	A2-vs-A3, B2-vs-B3, B1-vs-B3, A1-vs-B1	-	-	GO:0006351//transcription, DNA-dependent;GO:0006351//transcription, DNA-dependent
	osa-miR5499	LOC_Os08g32650	A2-vs-A3, B2-vs-B3, B1-vs-B3, A1-vs-B1	GO:0044464//cell part	GO:0015075//ion transmembrane transporter activity	GO:0006811//ion transport
	osa-miR159a.2	LOC_Os03g23050	A2-vs-B2	GO:0030874//nucleolar chromatin	GO:0003723//RNA binding	GO:0007126//meiosis;GO:0009553//embryo sac development;GO:0070076//histone lysine demethylation
	osa-miR160a-3p	LOC_Os04g36000	A2-vs-B2	-	-	-
	osa-miR160b-3p	LOC_Os04g36000	A2-vs-B2	-	-	-
	osa-miR160d-3p	LOC_Os03g20180	A2-vs-B2	-	-	-
	osa-miR160d-3p	LOC_Os04g36000	A2-vs-B2	-	-	-
	osa-miR166k-5p	LOC_Os09g26999	A1-vs-B1, A2-vs-B2	GO:0043229//intracellular organelle	-	-
	osa-miR397b	LOC_Os01g62490#	A2-vs-B2	GO:0005576//extracellular region;GO:0031410//cytoplasmic vesicle	GO:0046914//transition metal ion binding;GO:0016682//oxidoreductase activity, acting on diphenols and related substances as donors, oxygen as acceptor	GO:0009808//lignin metabolic process
	osa-miR397b	LOC_Os01g63190	A2-vs-B2	GO:0005576//extracellular region;GO:0031410//cytoplasmic vesicle;GO:0005576//extracellular region;GO:0031410//cytoplasmic vesicle	GO:0046914//transition metal ion binding;GO:0016682//oxidoreductase activity, acting on diphenols and related substances as donors, oxygen as acceptor;GO:0046914//transition metal ion binding;GO:0016682//oxidoreductase activity, acting on diphenols and related substances as donors, oxygen as acceptor	GO:0009808//lignin metabolic process;GO:0009808//lignin metabolic process
	osa-miR397b	LOC_Os03g04410	A2-vs-B2	GO:0043231//intracellular membrane-bounded organelle	GO:0043169//cation binding;GO:0051536//iron-sulfur cluster binding;GO:0016836//hydro-lyase activity	GO:0044262//cellular carbohydrate metabolic process
	osa-miR397b	LOC_Os10g41560	A2-vs-B2	GO:0043231//intracellular membrane-bounded organelle	-	-
	osa-miR397b	LOC_Os11g48060#	A2-vs-B2	GO:0005576//extracellular region;GO:0031410//cytoplasmic vesicle	GO:0046914//transition metal ion binding;GO:0016682//oxidoreductase activity, acting on diphenols and related substances as donors, oxygen as acceptor	GO:0009808//lignin metabolic process
	osa-miR408-3p	LOC_Os02g52180	A2-vs-B2	GO:0031410//cytoplasmic vesicle	-	-
	osa-miR408-3p	LOC_Os05g26610	A2-vs-B2	-	-	-
	osa-miR408-5p	LOC_Os04g34570	A2-vs-B2	-	-	-
	osa-miR408-5p	LOC_Os09g25600	A2-vs-B2	GO:0043231//intracellular membrane-bounded organelle	-	-
	osa-miR444f	LOC_Os04g52606	A2-vs-B2	-	GO:0004672//protein kinase activity;GO:0032559//adenyl ribonucleotide binding	GO:0006464//cellular protein modification process
	osa-miR528-5p	LOC_Os01g71840	A2-vs-B2	-	-	-
	osa-miR528-5p	LOC_Os08g04310#	A2-vs-B2	GO:0031410//cytoplasmic vesicle	GO:0046914//transition metal ion binding	-
	osa-miR528-5p	LOC_Os10g24094	A2-vs-B2	-	-	-
	osa-miR531a	LOC_Os09g36600	A2-vs-B2	GO:0043231//intracellular membrane-bounded organelle;GO:0043231//intracellular membrane-bounded organelle	-	GO:0009628//response to abiotic stimulus
	osa-miR531b	LOC_Os02g22020	A2-vs-B2	-	-	-
	osa-miR531b	LOC_Os02g36330	A2-vs-B2	-	GO:0046914//transition metal ion binding	-
	osa-miR531b	LOC_Os03g10210	A2-vs-B2	GO:0043231//intracellular membrane-bounded organelle	GO:0003677//DNA binding;GO:0001071//nucleic acid binding transcription factor activity	GO:0006351//transcription, DNA-dependent
	osa-miR531b	LOC_Os05g32370	A2-vs-B2	GO:0043231//intracellular membrane-bounded organelle	GO:0017111//nucleoside-triphosphatase activity;GO:0000166//nucleotide binding	-
	osa-miR531b	LOC_Os05g50470	A2-vs-B2	GO:0043231//intracellular membrane-bounded organelle	-	-
	osa-miR531b	LOC_Os09g36600	A2-vs-B2	GO:0043231//intracellular membrane-bounded organelle;GO:0043231//intracellular membrane-bounded organelle	-	GO:0009628//response to abiotic stimulus
	osa-miR531b	LOC_Os12g35610	A2-vs-B2	GO:0016020//membrane;GO:0016020//membrane;GO:0016020//membrane	GO:0046872//metal ion binding;GO:0050664//oxidoreductase activity, acting on NAD(P)H, oxygen as acceptor;GO:0046872//metal ion binding;GO:0050664//oxidoreductase activity, acting on NAD(P)H, oxygen as acceptor;GO:0046872//metal ion binding;GO:0016651//oxidoreductase activity, acting on NAD(P)H	-
	osa-miR531c	LOC_Os09g36600	A2-vs-B2	GO:0043231//intracellular membrane-bounded organelle;GO:0043231//intracellular membrane-bounded organelle	-	GO:0009628//response to abiotic stimulus
	osa-miR5486	LOC_Os06g06460	A2-vs-B2	GO:0000785//chromatin;GO:0031224//intrinsic to membrane;GO:0009536//plastid	GO:0003676//nucleic acid binding	GO:0034728//nucleosome organization;GO:0006810//transport
	osa-miR5486	LOC_Os06g06510	A2-vs-B2	GO:0000785//chromatin;GO:0031224//intrinsic to membrane;GO:0009536//plastid	GO:0003676//nucleic acid binding	GO:0034728//nucleosome organization;GO:0006810//transport
	osa-miR5486	LOC_Os06g23190	A2-vs-B2	-	GO:0016740//transferase activity	-
	osa-miR171c-5p	LOC_Os03g38170	A3-vs-B3	GO:0043231//intracellular membrane-bounded organelle;GO:0016020//membrane;GO:0043231//intracellular membrane-bounded organelle;GO:0016020//membrane	-	GO:0030029//actin filament-based process;GO:0030029//actin filament-based process
	osa-miR1846e	LOC_Os03g56370	A3-vs-B3	-	GO:0016741//transferase activity, transferring one-carbon groups	GO:0006730//one-carbon metabolic process
	osa-miR2865	LOC_Os03g57200	A3-vs-B3	-	-	-
	osa-miR394	LOC_Os07g35510	A3-vs-B3	GO:0031410//cytoplasmic vesicle	GO:0003824//catalytic activity	-
	osa-miR396a-5p	LOC_Os01g32750	A3-vs-B3	GO:0043231//intracellular membrane-bounded organelle	GO:0003676//nucleic acid binding	GO:0006355//regulation of transcription, DNA-dependent
	osa-miR396a-5p	LOC_Os01g70270	A3-vs-B3	GO:0043231//intracellular membrane-bounded organelle;GO:0043231//intracellular membrane-bounded organelle;GO:0043231//intracellular membrane-bounded organelle;GO:0043231//intracellular membrane-bounded organelle	GO:0003676//nucleic acid binding;GO:0003676//nucleic acid binding;GO:0003676//nucleic acid binding;GO:0003676//nucleic acid binding	GO:0006351//transcription, DNA-dependent;GO:0009719//response to endogenous stimulus;GO:0006351//transcription, DNA-dependent;GO:0009719//response to endogenous stimulus;GO:0006351//transcription, DNA-dependent;GO:0009719//response to endogenous stimulus;GO:0006351//transcription, DNA-dependent;GO:0009719//response to endogenous stimulus
	osa-miR396a-5p	LOC_Os02g13270	A3-vs-B3	GO:0031224//intrinsic to membrane	-	-
	osa-miR396a-5p	LOC_Os02g47280	A3-vs-B3	GO:0043231//intracellular membrane-bounded organelle;GO:0043231//intracellular membrane-bounded organelle	GO:0005488//binding;GO:0005488//binding	-
	osa-miR396a-5p	LOC_Os04g51190	A3-vs-B3*	GO:0043231//intracellular membrane-bounded organelle;GO:0043231//intracellular membrane-bounded organelle;GO:0043231//intracellular membrane-bounded organelle	-	-
	osa-miR396b-5p	LOC_Os01g32750	A3-vs-B3	GO:0043231//intracellular membrane-bounded organelle	GO:0003676//nucleic acid binding	GO:0006355//regulation of transcription, DNA-dependent
	osa-miR396b-5p	LOC_Os01g70270	A3-vs-B3	GO:0043231//intracellular membrane-bounded organelle;GO:0043231//intracellular membrane-bounded organelle;GO:0043231//intracellular membrane-bounded organelle;GO:0043231//intracellular membrane-bounded organelle	GO:0003676//nucleic acid binding;GO:0003676//nucleic acid binding;GO:0003676//nucleic acid binding;GO:0003676//nucleic acid binding	GO:0006351//transcription, DNA-dependent;GO:0009719//response to endogenous stimulus;GO:0006351//transcription, DNA-dependent;GO:0009719//response to endogenous stimulus;GO:0006351//transcription, DNA-dependent;GO:0009719//response to endogenous stimulus;GO:0006351//transcription, DNA-dependent;GO:0009719//response to endogenous stimulus
	osa-miR396b-5p	LOC_Os02g13270	A3-vs-B3	GO:0031224//intrinsic to membrane	-	-
	osa-miR396b-5p	LOC_Os02g47280	A3-vs-B3	GO:0043231//intracellular membrane-bounded organelle;GO:0043231//intracellular membrane-bounded organelle	GO:0005488//binding;GO:0005488//binding	-
	osa-miR396b-5p	LOC_Os04g51190	A3-vs-B3	GO:0043231//intracellular membrane-bounded organelle;GO:0043231//intracellular membrane-bounded organelle;GO:0043231//intracellular membrane-bounded organelle	-	-
	osa-miR5485	LOC_Os12g03094	A3-vs-B3	-	-	-
	osa-miR812f	LOC_Os03g50620	A3-vs-B3	-	GO:0005488//binding;GO:0005488//binding	-
	osa-miR812p	LOC_Os06g38210	A3-vs-B3	GO:0044464//cell part;GO:0044464//cell part	-	-
	osa-miR159a.1	LOC_Os01g32259	B1-vs-B2	-	-	-
	osa-miR159b	LOC_Os01g32259	B1-vs-B2	-	-	-
	osa-miR159f	LOC_Os03g33690	B1-vs-B2	-	-	-
	osa-miR160e-3p	LOC_Os01g66120	B1-vs-B2	-	GO:0003676//nucleic acid binding	-
	osa-miR160e-3p	LOC_Os10g39820	B1-vs-B2	-	GO:0003676//nucleic acid binding;GO:0046914//transition metal ion binding	-
	osa-miR160e-3p	LOC_Os12g23030	B1-vs-B2	GO:0043231//intracellular membrane-bounded organelle	-	-
	osa-miR164a	LOC_Os09g07300	A1-vs-A3, B1-vs-B2	GO:0044464//cell part	GO:0046914//transition metal ion binding;GO:0019787//small conjugating protein ligase activity	GO:0009725//response to hormone stimulus;GO:0048281//inflorescence morphogenesis;GO:0060918//auxin transport;GO:0032446//protein modification by small protein conjugation;GO:0009639//response to red or far red light;GO:0048513//organ development
	osa-miR164a	LOC_Os12g22270	B1-vs-B2	-	-	-
	osa-miR164b	LOC_Os12g22270	B1-vs-B2	-	-	-
	osa-miR164d	LOC_Os01g17430	B1-vs-B2	GO:0030120//vesicle coat	-	GO:0015031//protein transport
	osa-miR164d	LOC_Os01g44330	B1-vs-B2	GO:0005576//extracellular region	GO:0046914//transition metal ion binding;GO:0016682//oxidoreductase activity, acting on diphenols and related substances as donors, oxygen as acceptor	GO:0009808//lignin metabolic process
	osa-miR164d	LOC_Os02g18690	B1-vs-B2	-	-	-
	osa-miR164d	LOC_Os04g56995	B1-vs-B2	GO:0031410//cytoplasmic vesicle	-	-
	osa-miR164d	LOC_Os06g46270	B1-vs-B2	-	GO:0003676//nucleic acid binding	-
	osa-miR164d	LOC_Os08g10080	B1-vs-B2	-	-	-
	osa-miR164d	LOC_Os09g37700	B1-vs-B2	-	-	-
	osa-miR164d	LOC_Os12g41680	B1-vs-B2	-	GO:0003676//nucleic acid binding	-
	osa-miR164f	LOC_Os12g22270	B1-vs-B2	-	-	-
	osa-miR168a-5p	LOC_Os05g11550	B1-vs-B2	GO:0016604//nuclear body;GO:0031227//intrinsic to endoplasmic reticulum membrane;GO:0005635//nuclear envelope;GO:0016604//nuclear body;GO:0031227//intrinsic to endoplasmic reticulum membrane;GO:0005635//nuclear envelope	GO:0043169//cation binding;GO:0004620//phospholipase activity;GO:0004721//phosphoprotein phosphatase activity;GO:0043169//cation binding;GO:0004620//phospholipase activity;GO:0004721//phosphoprotein phosphatase activity	GO:0007165//signal transduction;GO:0051169//nuclear transport;GO:0006464//cellular protein modification process;GO:0007165//signal transduction;GO:0051169//nuclear transport;GO:0006464//cellular protein modification process
	osa-miR168a-5p	LOC_Os11g40284	B1-vs-B2	-	-	-
	osa-miR169a	LOC_Os01g41650	B1-vs-B2	-	-	-
	osa-miR169a	LOC_Os02g53620	B1-vs-B2	GO:0031410//cytoplasmic vesicle	-	-
	osa-miR169a	LOC_Os03g07880	B1-vs-B2	GO:0005667//transcription factor complex;GO:0031410//cytoplasmic vesicle;GO:0005667//transcription factor complex;GO:0031410//cytoplasmic vesicle;GO:0005667//transcription factor complex;GO:0031410//cytoplasmic vesicle	GO:0003676//nucleic acid binding;GO:0001071//nucleic acid binding transcription factor activity;GO:0003676//nucleic acid binding;GO:0001071//nucleic acid binding transcription factor activity;GO:0003676//nucleic acid binding;GO:0001071//nucleic acid binding transcription factor activity	GO:0006351//transcription, DNA-dependent;GO:0006351//transcription, DNA-dependent;GO:0006351//transcription, DNA-dependent
	osa-miR169a	LOC_Os05g31680	B1-vs-B2	-	-	-
	osa-miR169a	LOC_Os06g08720	B1-vs-B2*	GO:0031410//cytoplasmic vesicle;GO:0031410//cytoplasmic vesicle;GO:0031410//cytoplasmic vesicle	GO:0004180//carboxypeptidase activity;GO:0004180//carboxypeptidase activity;GO:0004180//carboxypeptidase activity	GO:0019538//protein metabolic process;GO:0019538//protein metabolic process;GO:0019538//protein metabolic process
	osa-miR169a	LOC_Os07g06470	B1-vs-B2	-	-	-
	osa-miR169a	LOC_Os07g06740	B1-vs-B2	-	GO:0046872//metal ion binding;GO:0004674//protein serine/threonine kinase activity;GO:0032559//adenyl ribonucleotide binding;GO:0046872//metal ion binding;GO:0004674//protein serine/threonine kinase activity;GO:0032559//adenyl ribonucleotide binding;GO:0046872//metal ion binding;GO:0004672//protein kinase activity;GO:0032559//adenyl ribonucleotide binding	GO:0006464//cellular protein modification process;GO:0006464//cellular protein modification process;GO:0006464//cellular protein modification process
	osa-miR169a	LOC_Os07g41720	B1-vs-B2	-	-	-
	osa-miR171i-3p	LOC_Os03g04300	B1-vs-B2	GO:0043231//intracellular membrane-bounded organelle;GO:0009536//plastid;GO:0043231//intracellular membrane-bounded organelle	GO:0005488//binding	-
	osa-miR171i-3p	LOC_Os03g38170	B1-vs-B2*	GO:0043231//intracellular membrane-bounded organelle;GO:0016020//membrane;GO:0043231//intracellular membrane-bounded organelle;GO:0016020//membrane	-	GO:0030029//actin filament-based process;GO:0030029//actin filament-based process
	osa-miR1850.1	LOC_Os02g30140	B1-vs-B2	GO:0031410//cytoplasmic vesicle;GO:0031410//cytoplasmic vesicle	-	-
	osa-miR1850.1	LOC_Os04g33510	B1-vs-B2	-	-	-
	osa-miR1850.1	LOC_Os04g48375	B1-vs-B2	-	GO:0005488//binding	-
	osa-miR1850.1	LOC_Os05g27530	B1-vs-B2	-	GO:0000166//nucleotide binding;GO:0032561//guanyl ribonucleotide binding	GO:0006810//transport;GO:0035556//intracellular signal transduction
	osa-miR1879	LOC_Os03g58590	B1-vs-B2	GO:0043231//intracellular membrane-bounded organelle	-	-
	osa-miR396a-5p	LOC_Os04g57830	B1-vs-B2	-	-	-
	osa-miR396b-5p	LOC_Os04g57830	B1-vs-B2	-	-	-
	osa-miR396c-3p	LOC_Os10g18860	B1-vs-B2	-	GO:0003676//nucleic acid binding	GO:0006259//DNA metabolic process
	osa-miR396c-5p	LOC_Os04g57830	B1-vs-B2	-	-	-
	osa-miR396e-5p	LOC_Os04g57830	B1-vs-B2	-	-	-
	osa-miR396f-5p	LOC_Os04g57830	B1-vs-B2	-	-	-
	osa-miR408-3p	LOC_Os03g63390	B1-vs-B2	GO:0031410//cytoplasmic vesicle	GO:0046872//metal ion binding	-
	osa-miR408-5p	LOC_Os01g43480	B1-vs-B2	-	GO:0016462//pyrophosphatase activity;GO:0032559//adenyl ribonucleotide binding;GO:0016462//pyrophosphatase activity;GO:0032559//adenyl ribonucleotide binding;GO:0016462//pyrophosphatase activity;GO:0032559//adenyl ribonucleotide binding	-
	osa-miR408-5p	LOC_Os05g11310	B1-vs-B2	-	-	-
	osa-miR408-5p	LOC_Os08g29590	B1-vs-B2	-	GO:0046914//transition metal ion binding	-
	osa-miR408-5p	LOC_Os10g41170	B1-vs-B2	-	-	-
	osa-miR5074	LOC_Os01g51480	B1-vs-B2	-	-	-
	osa-miR5074	LOC_Os02g05620	B1-vs-B2	-	-	-
	osa-miR5074	LOC_Os02g38120	B1-vs-B2	-	-	GO:0050896//response to stimulus
	osa-miR5074	LOC_Os06g01230	B1-vs-B2	-	-	GO:0006351//transcription, DNA-dependent;GO:0006351//transcription, DNA-dependent
	osa-miR5074	LOC_Os06g10020	B1-vs-B2	GO:0031410//cytoplasmic vesicle	-	-
	osa-miR5074	LOC_Os06g23650	B1-vs-B2	-	GO:0003676//nucleic acid binding	-
	osa-miR5074	LOC_Os06g27560	B1-vs-B2	-	GO:0016740//transferase activity	-
	osa-miR5150-3p	LOC_Os04g53560	B1-vs-B2	GO:0043231//intracellular membrane-bounded organelle	-	-
	osa-miR528-5p	LOC_Os02g42910	B1-vs-B2	-	-	-
	osa-miR528-5p	LOC_Os03g63390	B1-vs-B2	GO:0031410//cytoplasmic vesicle	GO:0046872//metal ion binding	-
	osa-miR528-5p	LOC_Os04g04330	B1-vs-B2	-	GO:0004672//protein kinase activity;GO:0032559//adenyl ribonucleotide binding;GO:0004672//protein kinase activity;GO:0032559//adenyl ribonucleotide binding	GO:0006464//cellular protein modification process;GO:0006464//cellular protein modification process
	osa-miR528-5p	LOC_Os08g40700	B1-vs-B2	-	-	-
	osa-miR528-5p	LOC_Os09g20090	B1-vs-B2	-	GO:0046914//transition metal ion binding;GO:0016682//oxidoreductase activity, acting on diphenols and related substances as donors, oxygen as acceptor	GO:0008152//metabolic process
	osa-miR5487	LOC_Os06g18820	B1-vs-B2	-	-	-
	osa-miR5490	LOC_Os01g06810	B1-vs-B2	-	-	-
	osa-miR5490	LOC_Os03g20690	B1-vs-B2	-	-	-
	osa-miR5490	LOC_Os06g14570	B1-vs-B2	-	GO:0004175//endopeptidase activity;GO:0003676//nucleic acid binding;GO:0034061//DNA polymerase activity	GO:0006260//DNA replication;GO:0019538//protein metabolic process
	osa-miR5491	LOC_Os10g28600	B1-vs-B2	-	-	-
	osa-miR5496	LOC_Os06g21330	B1-vs-B2	-	-	-
	osa-miR5496	LOC_Os06g37450	B1-vs-B2	-	-	-
	osa-miR5496	LOC_Os07g05174	B1-vs-B2	-	-	-
	osa-miR5496	LOC_Os07g25530	B1-vs-B2	-	-	-
	osa-miR5504	LOC_Os12g27370	B1-vs-B2	-	-	-
	osa-miR5508	LOC_Os02g25740	B1-vs-B2	GO:0043231//intracellular membrane-bounded organelle	-	-
	osa-miR5797	LOC_Os02g15980	B1-vs-B2	GO:0043231//intracellular membrane-bounded organelle	-	-
	osa-miR5837.2	LOC_Os01g33960	B1-vs-B2	GO:0043234//protein complex;GO:0044464//cell part	GO:0035251//UDP-glucosyltransferase activity	GO:0006074//(1->3)-beta-D-glucan metabolic process
	osa-miR5837.2	LOC_Os07g29090	B1-vs-B2	-	-	-
	osa-miR5837.2	LOC_Os07g30930	B1-vs-B2	-	-	-
	osa-miR812n-3p	LOC_Os02g07960	B1-vs-B2	GO:0043231//intracellular membrane-bounded organelle;GO:0044444//cytoplasmic part;GO:0043231//intracellular membrane-bounded organelle;GO:0044444//cytoplasmic part;GO:0043231//intracellular membrane-bounded organelle;GO:0044444//cytoplasmic part	GO:0016301//kinase activity;GO:0032559//adenyl ribonucleotide binding;GO:0016301//kinase activity;GO:0032559//adenyl ribonucleotide binding;GO:0016301//kinase activity;GO:0032559//adenyl ribonucleotide binding	GO:0006464//cellular protein modification process;GO:0006464//cellular protein modification process;GO:0006464//cellular protein modification process
	osa-miR812n-3p	LOC_Os02g53180	B1-vs-B2	-	GO:0003824//catalytic activity;GO:0003824//catalytic activity;GO:0003824//catalytic activity	GO:0008152//metabolic process;GO:0008152//metabolic process;GO:0008152//metabolic process
	osa-miR812n-3p	LOC_Os04g54560	B1-vs-B2	-	GO:0016740//transferase activity	-
	osa-miR812t	LOC_Os02g07960	B1-vs-B2	GO:0043231//intracellular membrane-bounded organelle;GO:0044444//cytoplasmic part;GO:0043231//intracellular membrane-bounded organelle;GO:0044444//cytoplasmic part;GO:0043231//intracellular membrane-bounded organelle;GO:0044444//cytoplasmic part	GO:0016301//kinase activity;GO:0032559//adenyl ribonucleotide binding;GO:0016301//kinase activity;GO:0032559//adenyl ribonucleotide binding;GO:0016301//kinase activity;GO:0032559//adenyl ribonucleotide binding	GO:0006464//cellular protein modification process;GO:0006464//cellular protein modification process;GO:0006464//cellular protein modification process
	osa-miR812t	LOC_Os04g54560	B1-vs-B2	-	GO:0016740//transferase activity	-
	osa-miR812u	LOC_Os02g07960	B1-vs-B2	GO:0043231//intracellular membrane-bounded organelle;GO:0044444//cytoplasmic part;GO:0043231//intracellular membrane-bounded organelle;GO:0044444//cytoplasmic part;GO:0043231//intracellular membrane-bounded organelle;GO:0044444//cytoplasmic part	GO:0016301//kinase activity;GO:0032559//adenyl ribonucleotide binding;GO:0016301//kinase activity;GO:0032559//adenyl ribonucleotide binding;GO:0016301//kinase activity;GO:0032559//adenyl ribonucleotide binding	GO:0006464//cellular protein modification process;GO:0006464//cellular protein modification process;GO:0006464//cellular protein modification process
	osa-miR812u	LOC_Os02g53180	B1-vs-B2	-	GO:0003824//catalytic activity;GO:0003824//catalytic activity;GO:0003824//catalytic activity	GO:0008152//metabolic process;GO:0008152//metabolic process;GO:0008152//metabolic process
	osa-miR812u	LOC_Os04g54560	B1-vs-B2	-	GO:0016740//transferase activity	-
	osa-miR815a	LOC_Os02g42040	B1-vs-B2	-	-	GO:0010467//gene expression;GO:0044260//cellular macromolecule metabolic process
	osa-miR815a	LOC_Os03g59264	B1-vs-B2	GO:0009536//plastid	-	-
	osa-miR815a	LOC_Os04g14760	B1-vs-B2	-	-	-
	osa-miR815a	LOC_Os05g25080	B1-vs-B2	-	-	-
	osa-miR815a	LOC_Os06g04140	B1-vs-B2	-	-	-
	osa-miR156l-5p	LOC_Os12g27102	B1-vs-B2, A1-vs-B1	GO:0031410//cytoplasmic vesicle;GO:0031410//cytoplasmic vesicle;GO:0031410//cytoplasmic vesicle	GO:0008081//phosphoric diester hydrolase activity;GO:0008081//phosphoric diester hydrolase activity	GO:0044238//primary metabolic process;GO:0044238//primary metabolic process
	osa-miR166h-5p	LOC_Os10g40100	B1-vs-B2, A1-vs-B1	GO:0043231//intracellular membrane-bounded organelle;GO:0043231//intracellular membrane-bounded organelle	-	-
	osa-miR166k-5p	LOC_Os10g23090	B1-vs-B2, A1-vs-B1	-	-	-
	osa-miR5074	LOC_Os01g34130	B1-vs-B2, A1-vs-B1	-	-	-
	osa-miR5074	LOC_Os04g07860	B1-vs-B2, A1-vs-B1	-	-	-
	osa-miR5074	LOC_Os05g34110	B1-vs-B2, A1-vs-B1	-	GO:0001071//nucleic acid binding transcription factor activity	GO:0006351//transcription, DNA-dependent
	osa-miR5074	LOC_Os05g38640	B1-vs-B2, A1-vs-B1	GO:0000785//chromatin;GO:0043231//intracellular membrane-bounded organelle	GO:0003676//nucleic acid binding	GO:0034728//nucleosome organization
	osa-miR5074	LOC_Os05g51750	B1-vs-B2, A1-vs-B1	GO:0031410//cytoplasmic vesicle	GO:0016787//hydrolase activity	-
	osa-miR5074	LOC_Os06g44610	B1-vs-B2, A1-vs-B1	GO:0044464//cell part	-	-
	osa-miR5074	LOC_Os07g10780	B1-vs-B2, A1-vs-B1	-	-	-
	osa-miR5074	LOC_Os08g11810	B1-vs-B2, A1-vs-B1	-	GO:0003676//nucleic acid binding;GO:0034061//DNA polymerase activity	GO:0006260//DNA replication
	osa-miR5074	LOC_Os10g42130	B1-vs-B2, A1-vs-B1	-	-	-
	osa-miR5074	LOC_Os12g15790	B1-vs-B2, A1-vs-B1	-	-	-
	osa-miR5179	LOC_Os02g21009	B1-vs-B2, A1-vs-B1	GO:0016020//membrane;GO:0016020//membrane	-	GO:0006810//transport;GO:0006810//transport
	osa-miR5488	LOC_Os08g31130	B1-vs-B2, A1-vs-B1	GO:0031410//cytoplasmic vesicle	-	-
	osa-miR5490	LOC_Os01g23040	B1-vs-B2, A1-vs-B1	-	GO:0004175//endopeptidase activity;GO:0003676//nucleic acid binding;GO:0034061//DNA polymerase activity	GO:0006260//DNA replication;GO:0019538//protein metabolic process
	osa-miR5490	LOC_Os06g03340	B1-vs-B2, A1-vs-B1	-	-	-
	osa-miR5516a	LOC_Os09g22500	B1-vs-B2, A1-vs-B1	-	-	-
	osa-miR5516b	LOC_Os09g22500	B1-vs-B2, A1-vs-B1	-	-	-
	osa-miR5521	LOC_Os03g51230	B1-vs-B2, A1-vs-B1	-	GO:0017111//nucleoside-triphosphatase activity;GO:0003676//nucleic acid binding;GO:0032559//adenyl ribonucleotide binding;GO:0017111//nucleoside-triphosphatase activity;GO:0003676//nucleic acid binding;GO:0032559//adenyl ribonucleotide binding	-
	osa-miR5793	LOC_Os02g11930#	B1-vs-B2, A1-vs-B1	GO:0043231//intracellular membrane-bounded organelle;GO:0031410//cytoplasmic vesicle	GO:0004672//protein kinase activity;GO:0000166//nucleotide binding	-
	osa-miR5797	LOC_Os08g28030	B1-vs-B2, A1-vs-B1	-	-	-
	osa-miR5836	LOC_Os03g21590	B1-vs-B2, A1-vs-B1	-	-	-
	osa-miR408-3p	LOC_Os01g29409	B1-vs-B2, A2-vs-B2	-	-	-
	osa-miR408-3p	LOC_Os02g49850	B1-vs-B2, A2-vs-B2	-	-	-
	osa-miR408-3p	LOC_Os03g07080	B1-vs-B2, A2-vs-B2	-	GO:0000175//3'-5'-exoribonuclease activity;GO:0000175//3'-5'-exoribonuclease activity;GO:0000175//3'-5'-exoribonuclease activity	-
	osa-miR408-3p	LOC_Os03g15340	B1-vs-B2, A2-vs-B2	GO:0031410//cytoplasmic vesicle	GO:0046914//transition metal ion binding	-
	osa-miR408-3p	LOC_Os03g50140	B1-vs-B2*, A2-vs-B2*	GO:0031410//cytoplasmic vesicle	-	-
	osa-miR408-3p	LOC_Os07g43540	B1-vs-B2, A2-vs-B2	GO:0000808//origin recognition complex	GO:0003676//nucleic acid binding	GO:0006259//DNA metabolic process
	osa-miR408-3p	LOC_Os11g04190	B1-vs-B2*, A2-vs-B2	GO:0016020//membrane	-	-
	osa-miR408-5p	LOC_Os10g39390	B1-vs-B2, A2-vs-B2	GO:0031410//cytoplasmic vesicle	-	-
	osa-miR528-5p	LOC_Os06g47320	B1-vs-B2, A2-vs-B2	GO:0044424//intracellular part	GO:0005515//protein binding;GO:0032559//adenyl ribonucleotide binding	GO:0044267//cellular protein metabolic process;GO:0010038//response to metal ion
	osa-miR528-5p	LOC_Os07g09760	B1-vs-B2, A2-vs-B2	-	-	-
	osa-miR528-5p	LOC_Os07g22930	B1-vs-B2, A2-vs-B2	GO:0009536//plastid;GO:0009536//plastid;GO:0009536//plastid	GO:0046527//glucosyltransferase activity;GO:0046527//glucosyltransferase activity;GO:0046527//glucosyltransferase activity	GO:0005982//starch metabolic process;GO:0005977//glycogen metabolic process;GO:0005982//starch metabolic process;GO:0005977//glycogen metabolic process;GO:0005982//starch metabolic process;GO:0005977//glycogen metabolic process
	osa-miR528-5p	LOC_Os07g37560	B1-vs-B2, A2-vs-B2	GO:0043231//intracellular membrane-bounded organelle;GO:0015629//actin cytoskeleton;GO:0043231//intracellular membrane-bounded organelle;GO:0015629//actin cytoskeleton;GO:0043231//intracellular membrane-bounded organelle;GO:0015629//actin cytoskeleton	GO:0008092//cytoskeletal protein binding;GO:0017111//nucleoside-triphosphatase activity;GO:0032559//adenyl ribonucleotide binding;GO:0008092//cytoskeletal protein binding;GO:0017111//nucleoside-triphosphatase activity;GO:0032559//adenyl ribonucleotide binding;GO:0008092//cytoskeletal protein binding;GO:0017111//nucleoside-triphosphatase activity;GO:0032559//adenyl ribonucleotide binding	-
	osa-miR396a-5p	LOC_Os04g49430	B1-vs-B2, A3-vs-B3	-	GO:0046872//metal ion binding	-
	osa-miR396b-5p	LOC_Os04g49430	B1-vs-B2, A3-vs-B3	-	GO:0046872//metal ion binding	-
	osa-miR156l-5p	LOC_Os04g46580	B1-vs-B2, B1-vs-B3	GO:0043231//intracellular membrane-bounded organelle	GO:0003676//nucleic acid binding	-
	osa-miR159a.2	LOC_Os02g05720	B1-vs-B2*, B1-vs-B3*	GO:0043231//intracellular membrane-bounded organelle	-	-
	osa-miR159f	LOC_Os01g38100	B1-vs-B2, B1-vs-B3	-	-	-
	osa-miR164c	LOC_Os02g44380	B1-vs-B2, B1-vs-B3	-	-	-
	osa-miR164c	LOC_Os12g41680	B1-vs-B2, B1-vs-B3	-	GO:0003676//nucleic acid binding	-
	osa-miR166k-5p	LOC_Os04g23630	B1-vs-B2, B1-vs-B3	GO:0044464//cell part	GO:0030246//carbohydrate binding;GO:0004672//protein kinase activity;GO:0032559//adenyl ribonucleotide binding	GO:0006464//cellular protein modification process;GO:0008037//cell recognition
	osa-miR166k-5p	LOC_Os10g31856	B1-vs-B2, B1-vs-B3	GO:0043231//intracellular membrane-bounded organelle	-	-
	osa-miR171i-3p	LOC_Os01g60000	B1-vs-B2, B1-vs-B3	-	-	-
	osa-miR1850.1	LOC_Os01g58520	B1-vs-B2, B1-vs-B3	-	GO:0032559//adenyl ribonucleotide binding	GO:0012501//programmed cell death
	osa-miR1850.1	LOC_Os03g01216	B1-vs-B2, B1-vs-B3	GO:0043231//intracellular membrane-bounded organelle	GO:0016831//carboxy-lyase activity	-
	osa-miR1850.1	LOC_Os03g61050	B1-vs-B2, B1-vs-B3	GO:0031410//cytoplasmic vesicle	-	GO:0009555//pollen development
	osa-miR1850.1	LOC_Os03g63260	B1-vs-B2, B1-vs-B3	-	-	-
	osa-miR1850.1	LOC_Os04g02070	B1-vs-B2, B1-vs-B3	GO:0031410//cytoplasmic vesicle;GO:0031410//cytoplasmic vesicle;GO:0031410//cytoplasmic vesicle;GO:0031410//cytoplasmic vesicle	-	-
	osa-miR1850.1	LOC_Os04g47410	B1-vs-B2, B1-vs-B3	GO:0044464//cell part;GO:0044464//cell part;GO:0044464//cell part;GO:0044464//cell part	GO:0046872//metal ion binding;GO:0046872//metal ion binding;GO:0046872//metal ion binding	-
	osa-miR1850.1	LOC_Os05g37170	B1-vs-B2, B1-vs-B3	GO:0043231//intracellular membrane-bounded organelle;GO:0043231//intracellular membrane-bounded organelle;GO:0043231//intracellular membrane-bounded organelle;GO:0043231//intracellular membrane-bounded organelle;GO:0043231//intracellular membrane-bounded organelle;GO:0043231//intracellular membrane-bounded organelle;GO:0043231//intracellular membrane-bounded organelle	GO:0003677//DNA binding;GO:0001071//nucleic acid binding transcription factor activity;GO:0005515//protein binding;GO:0003677//DNA binding;GO:0001071//nucleic acid binding transcription factor activity;GO:0005515//protein binding;GO:0003677//DNA binding;GO:0001071//nucleic acid binding transcription factor activity;GO:0005515//protein binding;GO:0003677//DNA binding;GO:0001071//nucleic acid bindi…	GO:0006351//transcription, DNA-dependent;GO:0006351//transcription, DNA-dependent;GO:0006351//transcription, DNA-dependent;GO:0006351//transcription, DNA-dependent;GO:0006351//transcription, DNA-dependent;GO:0006351//transcription, DNA-dependent;GO:0006351//transcription, DNA-dependent
	osa-miR1850.1	LOC_Os06g07630	B1-vs-B2, B1-vs-B3	GO:0044424//intracellular part	GO:0016462//pyrophosphatase activity;GO:0032559//adenyl ribonucleotide binding	GO:0009057//macromolecule catabolic process
	osa-miR1850.1	LOC_Os08g04650	B1-vs-B2, B1-vs-B3	GO:0031410//cytoplasmic vesicle	-	-
	osa-miR1850.1	LOC_Os09g07900	B1-vs-B2, B1-vs-B3	GO:0043234//protein complex;GO:0043231//intracellular membrane-bounded organelle;GO:0044444//cytoplasmic part	GO:0019787//small conjugating protein ligase activity	GO:0019941//modification-dependent protein catabolic process;GO:0032446//protein modification by small protein conjugation
	osa-miR1850.1	LOC_Os09g26530	B1-vs-B2, B1-vs-B3	-	-	-
	osa-miR1850.1	LOC_Os11g37890	B1-vs-B2, B1-vs-B3	-	GO:0048037//cofactor binding;GO:0016857//racemase and epimerase activity, acting on carbohydrates and derivatives;GO:0048037//cofactor binding;GO:0016857//racemase and epimerase activity, acting on carbohydrates and derivatives;GO:0048037//cofactor binding;GO:0016857//racemase and epimerase activity, acting on carbohydrates and derivatives	GO:0008152//metabolic process;GO:0008152//metabolic process;GO:0008152//metabolic process
	osa-miR2093-3p	LOC_Os02g09670	B1-vs-B2, B1-vs-B3	GO:0031224//intrinsic to membrane;GO:0043231//intracellular membrane-bounded organelle	GO:0017111//nucleoside-triphosphatase activity;GO:0015405//P-P-bond-hydrolysis-driven transmembrane transporter activity;GO:0032559//adenyl ribonucleotide binding	GO:0006810//transport;GO:0009207//purine ribonucleoside triphosphate catabolic process
	osa-miR2093-3p	LOC_Os07g38070	B1-vs-B2*, B1-vs-B3*	GO:0043231//intracellular membrane-bounded organelle	GO:0004871//signal transducer activity;GO:0004672//protein kinase activity;GO:0032559//adenyl ribonucleotide binding	GO:0006464//cellular protein modification process
	osa-miR2093-3p	LOC_Os07g42180	B1-vs-B2, B1-vs-B3	-	GO:0022891//substrate-specific transmembrane transporter activity	GO:0006405//RNA export from nucleus;GO:0009791//post-embryonic development;GO:0009933//meristem structural organization
	osa-miR319b	LOC_Os12g35630	B1-vs-B2, B1-vs-B3	GO:0009526//plastid envelope;GO:0009532//plastid stroma;GO:0009526//plastid envelope;GO:0009532//plastid stroma	-	GO:0010038//response to metal ion;GO:0010038//response to metal ion
	osa-miR396c-3p	LOC_Os02g36520	B1-vs-B2, B1-vs-B3	-	-	-
	osa-miR396c-5p	LOC_Os01g32090	B1-vs-B2, B1-vs-B3	-	GO:0046872//metal ion binding;GO:0016831//carboxy-lyase activity;GO:0019842//vitamin binding	-
	osa-miR396c-5p	LOC_Os05g45220	B1-vs-B2, B1-vs-B3	GO:0043231//intracellular membrane-bounded organelle;GO:0030529//ribonucleoprotein complex	GO:0016859//cis-trans isomerase activity;GO:0003723//RNA binding;GO:0005198//structural molecule activity	GO:0010467//gene expression;GO:0044267//cellular protein metabolic process;GO:0022618//ribonucleoprotein complex assembly
	osa-miR396c-5p	LOC_Os07g40820	B1-vs-B2, B1-vs-B3	-	-	-
	osa-miR396e-5p	LOC_Os03g46330	B1-vs-B2, B1-vs-B3	GO:0044464//cell part	GO:0005083//small GTPase regulator activity;GO:0042802//identical protein binding	GO:0033205//cell cycle cytokinesis;GO:0009926//auxin polar transport;GO:0000902//cell morphogenesis;GO:0045229//external encapsulating structure organization;GO:0032011//ARF protein signal transduction;GO:0001738//morphogenesis of a polarized epithelium;GO:0048764//trichoblast maturation;GO:0032386//regulation of intracellular transport;GO:0048527//lateral root development;GO:0003006//development…
	osa-miR396f-5p	LOC_Os02g48220	B1-vs-B2, B1-vs-B3	-	-	-
	osa-miR396f-5p	LOC_Os03g46330	B1-vs-B2, B1-vs-B3	GO:0044464//cell part	GO:0005083//small GTPase regulator activity;GO:0042802//identical protein binding	GO:0033205//cell cycle cytokinesis;GO:0009926//auxin polar transport;GO:0000902//cell morphogenesis;GO:0045229//external encapsulating structure organization;GO:0032011//ARF protein signal transduction;GO:0001738//morphogenesis of a polarized epithelium;GO:0048764//trichoblast maturation;GO:0032386//regulation of intracellular transport;GO:0048527//lateral root development;GO:0003006//development…
	osa-miR5150-3p	LOC_Os05g48380	B1-vs-B2, B1-vs-B3	-	-	-
	osa-miR5179	LOC_Os12g15420	B1-vs-B2, B1-vs-B3	GO:0043231//intracellular membrane-bounded organelle	-	GO:0044260//cellular macromolecule metabolic process
	osa-miR5508	LOC_Os05g41950	B1-vs-B2, B1-vs-B3*	-	GO:0004672//protein kinase activity;GO:0032559//adenyl ribonucleotide binding	GO:0006464//cellular protein modification process
	osa-miR5508	LOC_Os06g25770	B1-vs-B2, B1-vs-B3	GO:0043231//intracellular membrane-bounded organelle	-	-
	osa-miR5512a	LOC_Os03g05110	B1-vs-B2, B1-vs-B3	GO:0044464//cell part	GO:0016740//transferase activity	-
	osa-miR5512a	LOC_Os04g39280	B1-vs-B2, B1-vs-B3	GO:0000781//chromosome, telomeric region;GO:0000781//chromosome, telomeric region	GO:0003676//nucleic acid binding;GO:0003676//nucleic acid binding	GO:0006259//DNA metabolic process;GO:0006259//DNA metabolic process
	osa-miR5512a	LOC_Os04g53700	B1-vs-B2, B1-vs-B3	-	-	-
	osa-miR5512b	LOC_Os03g05110	B1-vs-B2, B1-vs-B3	GO:0044464//cell part	GO:0016740//transferase activity	-
	osa-miR5512b	LOC_Os04g39280	B1-vs-B2, B1-vs-B3	GO:0000781//chromosome, telomeric region;GO:0000781//chromosome, telomeric region	GO:0003676//nucleic acid binding;GO:0003676//nucleic acid binding	GO:0006259//DNA metabolic process;GO:0006259//DNA metabolic process
	osa-miR5512b	LOC_Os04g53700	B1-vs-B2, B1-vs-B3	-	-	-
	osa-miR5528	LOC_Os05g36010	B1-vs-B2, B1-vs-B3	GO:0031410//cytoplasmic vesicle	GO:0004175//endopeptidase activity	GO:0019538//protein metabolic process
	osa-miR5817	LOC_Os05g51490	B1-vs-B2, B1-vs-B3	-	-	-
	osa-miR5836	LOC_Os02g54150	B1-vs-B2, B1-vs-B3	-	GO:0016788//hydrolase activity, acting on ester bonds	-
	osa-miR5837.2	LOC_Os01g42010	B1-vs-B2, B1-vs-B3	GO:0031224//intrinsic to membrane;GO:0031224//intrinsic to membrane	-	-
	osa-miR5837.2	LOC_Os04g32940	B1-vs-B2, B1-vs-B3	GO:0043231//intracellular membrane-bounded organelle	-	-
	osa-miR5837.2	LOC_Os08g16710	B1-vs-B2, B1-vs-B3	GO:0043231//intracellular membrane-bounded organelle	-	-
	osa-miR5837.2	LOC_Os09g35980	B1-vs-B2, B1-vs-B3	GO:0043231//intracellular membrane-bounded organelle;GO:0043231//intracellular membrane-bounded organelle	-	-
	osa-miR815a	LOC_Os01g65450	B1-vs-B2, B1-vs-B3	GO:0043231//intracellular membrane-bounded organelle;GO:0043231//intracellular membrane-bounded organelle	GO:0016791//phosphatase activity;GO:0016791//phosphatase activity	-
	osa-miR815a	LOC_Os02g14780	B1-vs-B2, B1-vs-B3	-	GO:0003676//nucleic acid binding;GO:0003676//nucleic acid binding	GO:0010467//gene expression;GO:0010467//gene expression
	osa-miR815a	LOC_Os03g06760	B1-vs-B2, B1-vs-B3	GO:0043234//protein complex;GO:0043234//protein complex	-	GO:0006887//exocytosis;GO:0006887//exocytosis
	osa-miR815a	LOC_Os03g18620	B1-vs-B2, B1-vs-B3	GO:0043231//intracellular membrane-bounded organelle	GO:0016892//endoribonuclease activity, producing 3'-phosphomonoesters;GO:0003676//nucleic acid binding	-
	osa-miR815a	LOC_Os03g50470	B1-vs-B2, B1-vs-B3	GO:0043231//intracellular membrane-bounded organelle;GO:0043231//intracellular membrane-bounded organelle	-	-
	osa-miR815a	LOC_Os04g20920	B1-vs-B2, B1-vs-B3	-	-	-
	osa-miR815a	LOC_Os05g39390	B1-vs-B2, B1-vs-B3	GO:0043231//intracellular membrane-bounded organelle;GO:0016020//membrane	-	-
	osa-miR815a	LOC_Os06g21099	B1-vs-B2, B1-vs-B3	-	-	-
	osa-miR815a	LOC_Os07g26560	B1-vs-B2, B1-vs-B3	GO:0044464//cell part	-	-
	osa-miR815a	LOC_Os07g29320	B1-vs-B2, B1-vs-B3	-	-	-
	osa-miR815a	LOC_Os08g01650	B1-vs-B2, B1-vs-B3	-	-	-
	osa-miR815a	LOC_Os09g06719	B1-vs-B2, B1-vs-B3	-	-	-
	osa-miR815a	LOC_Os11g38000	B1-vs-B2, B1-vs-B3	-	-	-
	osa-miR815a	LOC_Os12g19090	B1-vs-B2, B1-vs-B3	-	GO:0004175//endopeptidase activity	-
	osa-miR164b	LOC_Os02g44380	B1-vs-B2, B1-vs-B3, A1-vs-B1	-	-	-
	osa-miR164f	LOC_Os02g44380	B1-vs-B2, B1-vs-B3, A1-vs-B1	-	-	-
	osa-miR166k-5p	LOC_Os08g07290	B1-vs-B2, B1-vs-B3, A1-vs-B1	GO:0043231//intracellular membrane-bounded organelle;GO:0043231//intracellular membrane-bounded organelle	-	-
	osa-miR2093-3p	LOC_Os01g72650	B1-vs-B2, B1-vs-B3, A1-vs-B1	-	GO:0005488//binding	-
	osa-miR2093-3p	LOC_Os03g20380	B1-vs-B2, B1-vs-B3, A1-vs-B1	GO:0043231//intracellular membrane-bounded organelle;GO:0031410//cytoplasmic vesicle;GO:0043231//intracellular membrane-bounded organelle;GO:0031410//cytoplasmic vesicle;GO:0043231//intracellular membrane-bounded organelle;GO:0031410//cytoplasmic vesicle;GO:0043231//intracellular membrane-bounded organelle;GO:0043231//intracellular membrane-bounded organelle;GO:0031410//cytoplasmic vesicle;GO:004…	GO:0004672//protein kinase activity;GO:0032559//adenyl ribonucleotide binding;GO:0004672//protein kinase activity;GO:0032559//adenyl ribonucleotide binding;GO:0004674//protein serine/threonine kinase activity;GO:0032559//adenyl ribonucleotide binding;GO:0004674//protein serine/threonine kinase activity;GO:0032559//adenyl ribonucleotide binding;GO:0004672//protein kinase activity;GO:0032559//adeny…	GO:0006464//cellular protein modification process;GO:0023052//signaling;GO:0006464//cellular protein modification process;GO:0023052//signaling;GO:0006464//cellular protein modification process;GO:0023052//signaling;GO:0006464//cellular protein modification process;GO:0023052//signaling;GO:0006464//cellular protein modification process;GO:0023052//signaling;GO:0006464//cellular protein modificati…
	osa-miR2093-3p	LOC_Os04g52940	B1-vs-B2, B1-vs-B3, A1-vs-B1	-	-	-
	osa-miR2093-3p	LOC_Os05g07070	B1-vs-B2, B1-vs-B3, A1-vs-B1	-	-	-
	osa-miR5179	LOC_Os04g17574	B1-vs-B2, B1-vs-B3, A1-vs-B1	-	-	-
	osa-miR5179	LOC_Os06g49840	B1-vs-B2*, B1-vs-B3*, A1-vs-B1	GO:0043231//intracellular membrane-bounded organelle;GO:0043231//intracellular membrane-bounded organelle	GO:0003677//DNA binding;GO:0001071//nucleic acid binding transcription factor activity;GO:0003677//DNA binding;GO:0001071//nucleic acid binding transcription factor activity	GO:0006351//transcription, DNA-dependent;GO:0006351//transcription, DNA-dependent
	osa-miR5488	LOC_Os02g08100	B1-vs-B2, B1-vs-B3*, A1-vs-B1	-	GO:0003824//catalytic activity	-
	osa-miR5491	LOC_Os06g07010	B1-vs-B2, B1-vs-B3, A1-vs-B1	-	GO:0046914//transition metal ion binding;GO:0046914//transition metal ion binding	-
	osa-miR5506	LOC_Os02g14770	B1-vs-B2, B1-vs-B3, A1-vs-B1	GO:0044424//intracellular part;GO:0044424//intracellular part;GO:0044424//intracellular part;GO:0044424//intracellular part	GO:0046872//metal ion binding;GO:0004611//phosphoenolpyruvate carboxykinase activity;GO:0016628//oxidoreductase activity, acting on the CH-CH group of donors, NAD or NADP as acceptor;GO:0046872//metal ion binding;GO:0004611//phosphoenolpyruvate carboxykinase activity;GO:0016628//oxidoreductase activity, acting on the CH-CH group of donors, NAD or NADP as acceptor;GO:0046872//metal ion binding;GO:…	GO:0071704;GO:0009060//aerobic respiration;GO:0043648//dicarboxylic acid metabolic process;GO:0071704;GO:0009060//aerobic respiration;GO:0043648//dicarboxylic acid metabolic process;GO:0071704;GO:0009060//aerobic respiration;GO:0043648//dicarboxylic acid metabolic process;GO:0071704;GO:0009060//aerobic respiration;GO:0043648//dicarboxylic acid metabolic process
	osa-miR5516a	LOC_Os09g02214	B1-vs-B2, B1-vs-B3, A1-vs-B1	GO:0043231//intracellular membrane-bounded organelle;GO:0031224//intrinsic to membrane;GO:0043231//intracellular membrane-bounded organelle;GO:0031224//intrinsic to membrane;GO:0043231//intracellular membrane-bounded organelle;GO:0031224//intrinsic to membrane	GO:0005451//monovalent cation:hydrogen antiporter activity;GO:0015142//tricarboxylic acid transmembrane transporter activity;GO:0005451//monovalent cation:hydrogen antiporter activity;GO:0015142//tricarboxylic acid transmembrane transporter activity;GO:0005451//monovalent cation:hydrogen antiporter activity;GO:0015142//tricarboxylic acid transmembrane transporter activity	GO:0006842//tricarboxylic acid transport;GO:0030001//metal ion transport;GO:0006842//tricarboxylic acid transport;GO:0030001//metal ion transport;GO:0006842//tricarboxylic acid transport;GO:0030001//metal ion transport
	osa-miR5516b	LOC_Os09g02214	B1-vs-B2, B1-vs-B3, A1-vs-B1	GO:0043231//intracellular membrane-bounded organelle;GO:0031224//intrinsic to membrane;GO:0043231//intracellular membrane-bounded organelle;GO:0031224//intrinsic to membrane;GO:0043231//intracellular membrane-bounded organelle;GO:0031224//intrinsic to membrane	GO:0005451//monovalent cation:hydrogen antiporter activity;GO:0015142//tricarboxylic acid transmembrane transporter activity;GO:0005451//monovalent cation:hydrogen antiporter activity;GO:0015142//tricarboxylic acid transmembrane transporter activity;GO:0005451//monovalent cation:hydrogen antiporter activity;GO:0015142//tricarboxylic acid transmembrane transporter activity	GO:0006842//tricarboxylic acid transport;GO:0030001//metal ion transport;GO:0006842//tricarboxylic acid transport;GO:0030001//metal ion transport;GO:0006842//tricarboxylic acid transport;GO:0030001//metal ion transport
	osa-miR5521	LOC_Os01g40990	B1-vs-B2, B1-vs-B3, A1-vs-B1	-	-	-
	osa-miR5521	LOC_Os05g08930	B1-vs-B2, B1-vs-B3, A1-vs-B1	GO:0043231//intracellular membrane-bounded organelle	-	-
	osa-miR5538	LOC_Os06g04830	B1-vs-B2, B1-vs-B3, A1-vs-B1	GO:0031410//cytoplasmic vesicle	-	-
	osa-miR5791	LOC_Os02g42330	B1-vs-B2, B1-vs-B3, A1-vs-B1	-	GO:0016787//hydrolase activity;GO:0016787//hydrolase activity	GO:0008152//metabolic process;GO:0008152//metabolic process
	osa-miR5791	LOC_Os12g10870	B1-vs-B2, B1-vs-B3, A1-vs-B1	GO:0031410//cytoplasmic vesicle	-	-
	osa-miR5797	LOC_Os01g15780	B1-vs-B2, B1-vs-B3, A1-vs-B1	GO:0043231//intracellular membrane-bounded organelle	GO:0016740//transferase activity;GO:0016740//transferase activity	GO:0008152//metabolic process;GO:0008152//metabolic process
	osa-miR5797	LOC_Os07g31700	B1-vs-B2, B1-vs-B3, A1-vs-B1	-	-	-
	osa-miR5836	LOC_Os02g39840	B1-vs-B2, B1-vs-B3, A1-vs-B1	-	GO:0003723//RNA binding;GO:0003723//RNA binding;GO:0008135//translation factor activity, nucleic acid binding	GO:0006412//translation;GO:0006412//translation;GO:0006412//translation
	osa-miR396a-5p	LOC_Os03g51970	B1-vs-B2, B1-vs-B3, A3-vs-B3	-	-	-
	osa-miR396a-5p	LOC_Os05g45220	B1-vs-B2, B1-vs-B3, A3-vs-B3	GO:0043231//intracellular membrane-bounded organelle;GO:0030529//ribonucleoprotein complex	GO:0016859//cis-trans isomerase activity;GO:0003723//RNA binding;GO:0005198//structural molecule activity	GO:0010467//gene expression;GO:0044267//cellular protein metabolic process;GO:0022618//ribonucleoprotein complex assembly
	osa-miR396a-5p	LOC_Os07g40820	B1-vs-B2, B1-vs-B3, A3-vs-B3	-	-	-
	osa-miR396b-5p	LOC_Os03g51970	B1-vs-B2, B1-vs-B3, A3-vs-B3	-	-	-
	osa-miR396b-5p	LOC_Os05g45220	B1-vs-B2, B1-vs-B3, A3-vs-B3	GO:0043231//intracellular membrane-bounded organelle;GO:0030529//ribonucleoprotein complex	GO:0016859//cis-trans isomerase activity;GO:0003723//RNA binding;GO:0005198//structural molecule activity	GO:0010467//gene expression;GO:0044267//cellular protein metabolic process;GO:0022618//ribonucleoprotein complex assembly
	osa-miR396b-5p	LOC_Os07g40820	B1-vs-B2, B1-vs-B3, A3-vs-B3	-	-	-
	osa-miR5150-3p	LOC_Os01g35160	B1-vs-B2, B1-vs-B3, A3-vs-B3	GO:0031410//cytoplasmic vesicle;GO:0031410//cytoplasmic vesicle	GO:0004672//protein kinase activity;GO:0004672//protein kinase activity	-
	osa-miR5150-3p	LOC_Os08g12680	B1-vs-B2, B1-vs-B3, A3-vs-B3	-	GO:0046872//metal ion binding	-
	osa-miR5150-3p	LOC_Os12g07370	B1-vs-B2, B1-vs-B3, A3-vs-B3	-	-	-
	osa-miR408-3p	LOC_Os02g43660	B1-vs-B2, B2-vs-B3	GO:0031410//cytoplasmic vesicle	GO:0046914//transition metal ion binding	-
	osa-miR408-3p	LOC_Os03g39460	B1-vs-B2, B2-vs-B3	-	-	-
	osa-miR408-3p	LOC_Os06g15600	B1-vs-B2, B2-vs-B3	-	-	-
	osa-miR408-3p	LOC_Os08g37670	B1-vs-B2*, B2-vs-B3*	GO:0031410//cytoplasmic vesicle	-	-
	osa-miR408-3p	LOC_Os12g02000	B1-vs-B2, B2-vs-B3	GO:0043231//intracellular membrane-bounded organelle	-	-
	osa-miR408-5p	LOC_Os03g15600	B1-vs-B2, B2-vs-B3	-	GO:0005515//protein binding	GO:0044267//cellular protein metabolic process
	osa-miR528-5p	LOC_Os01g41190	B1-vs-B2, B2-vs-B3	-	-	-
	osa-miR528-5p	LOC_Os01g66170	B1-vs-B2, B2-vs-B3	GO:0009536//plastid	-	-
	osa-miR528-5p	LOC_Os07g38290	B1-vs-B2, B2-vs-B3	-	-	-
	osa-miR528-5p	LOC_Os11g19240	B1-vs-B2, B2-vs-B3	GO:0016020//membrane	GO:0005275//amine transmembrane transporter activity	-
	osa-miR812t	LOC_Os02g53180	B1-vs-B2, B2-vs-B3	-	GO:0003824//catalytic activity;GO:0003824//catalytic activity;GO:0003824//catalytic activity	GO:0008152//metabolic process;GO:0008152//metabolic process;GO:0008152//metabolic process
	osa-miR408-3p	LOC_Os03g05650	B1-vs-B2, B2-vs-B3, A2-vs-B2	-	-	-
	osa-miR408-5p	LOC_Os09g23690	B1-vs-B2, B2-vs-B3, A2-vs-B2	-	-	-
	osa-miR528-5p	LOC_Os07g06680	B1-vs-B2, B2-vs-B3, A2-vs-B2	GO:0031410//cytoplasmic vesicle	-	-
	osa-miR164a	LOC_Os01g03720	A1-vs-A3, B1-vs-B2, B2-vs-B3, B1-vs-B3	GO:0043231//intracellular membrane-bounded organelle	GO:0003676//nucleic acid binding	-
	osa-miR164c	LOC_Os09g37700	B1-vs-B2, B2-vs-B3, B1-vs-B3	-	-	-
	osa-miR164c	LOC_Os12g03740	B1-vs-B2, B2-vs-B3, B1-vs-B3	-	-	-
	osa-miR408-3p	LOC_Os11g01470	A2-vs-B2, B1-vs-B2, B2-vs-B3, B1-vs-B3	GO:0043231//intracellular membrane-bounded organelle	-	-
	osa-miR5793	LOC_Os01g63460	B1-vs-B2, B2-vs-B3, B1-vs-B3, A1-vs-B1	-	-	-
	osa-miR5793	LOC_Os01g69920	B1-vs-B2, B2-vs-B3, B1-vs-B3, A1-vs-B1	GO:0043231//intracellular membrane-bounded organelle;GO:0043231//intracellular membrane-bounded organelle;GO:0043231//intracellular membrane-bounded organelle	GO:0004673//protein histidine kinase activity;GO:0004871//signal transducer activity;GO:0032559//adenyl ribonucleotide binding;GO:0004673//protein histidine kinase activity;GO:0004871//signal transducer activity;GO:0032559//adenyl ribonucleotide binding;GO:0004673//protein histidine kinase activity;GO:0004871//signal transducer activity;GO:0032559//adenyl ribonucleotide binding	GO:0006468//protein phosphorylation;GO:0007165//signal transduction;GO:0006351//transcription, DNA-dependent;GO:0006468//protein phosphorylation;GO:0007165//signal transduction;GO:0006351//transcription, DNA-dependent;GO:0006468//protein phosphorylation;GO:0007165//signal transduction;GO:0006351//transcription, DNA-dependent
	osa-miR1432-5p	LOC_Os05g07030	B1-vs-B3	GO:0009536//plastid;GO:0009536//plastid;GO:0009536//plastid	GO:0004812//aminoacyl-tRNA ligase activity;GO:0032559//adenyl ribonucleotide binding;GO:0004812//aminoacyl-tRNA ligase activity;GO:0032559//adenyl ribonucleotide binding;GO:0004812//aminoacyl-tRNA ligase activity;GO:0032559//adenyl ribonucleotide binding	GO:0006418//tRNA aminoacylation for protein translation;GO:0003006//developmental process involved in reproduction;GO:0006418//tRNA aminoacylation for protein translation;GO:0003006//developmental process involved in reproduction;GO:0006418//tRNA aminoacylation for protein translation;GO:0003006//developmental process involved in reproduction
	osa-miR156l-5p	LOC_Os08g39890	B1-vs-B3	-	-	-
	osa-miR159f	LOC_Os03g21380	B1-vs-B3	-	-	-
	osa-miR171e-5p	LOC_Os02g39530	B1-vs-B3	-	-	-
	osa-miR171i-3p	LOC_Os02g44370	B1-vs-B3	-	-	-
	osa-miR171i-5p	LOC_Os01g58240	B1-vs-B3	GO:0031410//cytoplasmic vesicle	GO:0004175//endopeptidase activity;GO:0005515//protein binding	GO:0019538//protein metabolic process;GO:0044092//negative regulation of molecular function
	osa-miR171i-5p	LOC_Os02g44360	B1-vs-B3*	-	-	-
	osa-miR171i-5p	LOC_Os02g44370	B1-vs-B3	-	-	-
	osa-miR171i-5p	LOC_Os04g46860	B1-vs-B3	-	-	-
	osa-miR171i-5p	LOC_Os09g26650	B1-vs-B3	GO:0043231//intracellular membrane-bounded organelle	GO:0051536//iron-sulfur cluster binding;GO:0043169//cation binding	-
	osa-miR171i-5p	LOC_Os10g27480	B1-vs-B3	GO:0043231//intracellular membrane-bounded organelle	-	-
	osa-miR171i-5p	LOC_Os10g40390	B1-vs-B3	-	-	-
	osa-miR1850.1	LOC_Os03g15940	B1-vs-B3	-	GO:0046914//transition metal ion binding	-
	osa-miR1850.1	LOC_Os10g36650	B1-vs-B3	GO:0030312//external encapsulating structure;GO:0031981//nuclear lumen;GO:0043232//intracellular non-membrane-bounded organelle;GO:0016020//membrane	GO:0005198//structural molecule activity;GO:0032559//adenyl ribonucleotide binding	GO:0009314//response to radiation;GO:0009725//response to hormone stimulus;GO:0009913//epidermal cell differentiation;GO:0048588//developmental cell growth;GO:0006950//response to stress
	osa-miR1850.1	LOC_Os10g37840	B1-vs-B3	GO:0009536//plastid;GO:0043231//intracellular membrane-bounded organelle;GO:0009536//plastid;GO:0009536//plastid;GO:0009536//plastid	-	GO:0017004//cytochrome complex assembly;GO:0017004//cytochrome complex assembly;GO:0017004//cytochrome complex assembly;GO:0017004//cytochrome complex assembly
	osa-miR1862a	LOC_Os07g28260	B1-vs-B3	-	-	-
	osa-miR1862b	LOC_Os01g40630	B1-vs-B3	GO:0043231//intracellular membrane-bounded organelle;GO:0043231//intracellular membrane-bounded organelle;GO:0043231//intracellular membrane-bounded organelle	GO:0003824//catalytic activity;GO:0003824//catalytic activity;GO:0003824//catalytic activity	GO:0003002//regionalization;GO:0010075//regulation of meristem growth;GO:0010074//maintenance of meristem identity;GO:0009690//cytokinin metabolic process;GO:0003002//regionalization;GO:0010075//regulation of meristem growth;GO:0010074//maintenance of meristem identity;GO:0009690//cytokinin metabolic process;GO:0003002//regionalization;GO:0010075//regulation of meristem growth;GO:0010074//mainten…
	osa-miR1862b	LOC_Os02g37694	B1-vs-B3	-	-	-
	osa-miR1862b	LOC_Os07g28260	B1-vs-B3	-	-	-
	osa-miR1862c	LOC_Os07g28260	B1-vs-B3	-	-	-
	osa-miR1862e	LOC_Os04g31120	B1-vs-B3	-	-	-
	osa-miR1862e	LOC_Os05g37910	B1-vs-B3	GO:0044464//cell part;GO:0044464//cell part	-	-
	osa-miR2093-3p	LOC_Os01g33800	B1-vs-B3	GO:0043231//intracellular membrane-bounded organelle;GO:0043231//intracellular membrane-bounded organelle	GO:0005515//protein binding;GO:0005515//protein binding	-
	osa-miR2093-3p	LOC_Os02g50990	B1-vs-B3	-	GO:0046872//metal ion binding;GO:0046872//metal ion binding;GO:0046872//metal ion binding	-
	osa-miR2093-3p	LOC_Os04g42784	B1-vs-B3	GO:0009536//plastid	GO:0016788//hydrolase activity, acting on ester bonds;GO:0032559//adenyl ribonucleotide binding;GO:0003690//double-stranded DNA binding	GO:0000002//mitochondrial genome maintenance;GO:0006281//DNA repair
	osa-miR2867-3p	LOC_Os03g14050	B1-vs-B3	GO:0031410//cytoplasmic vesicle;GO:0031410//cytoplasmic vesicle	-	-
	osa-miR2867-3p	LOC_Os11g02290	B1-vs-B3	-	-	-
	osa-miR2867-3p	LOC_Os12g40419	B1-vs-B3	GO:0031410//cytoplasmic vesicle;GO:0031410//cytoplasmic vesicle;GO:0031410//cytoplasmic vesicle	GO:0003824//catalytic activity;GO:0003824//catalytic activity	-
	osa-miR394	LOC_Os07g03070	B1-vs-B3	-	-	-
	osa-miR396c-3p	LOC_Os08g33440	B1-vs-B3	GO:0043231//intracellular membrane-bounded organelle	GO:0016747//transferase activity, transferring acyl groups other than amino-acyl groups	-
	osa-miR396e-5p	LOC_Os05g51670	B1-vs-B3	-	GO:0048037//cofactor binding;GO:0016857//racemase and epimerase activity, acting on carbohydrates and derivatives;GO:0048037//cofactor binding;GO:0016857//racemase and epimerase activity, acting on carbohydrates and derivatives;GO:0048037//cofactor binding;GO:0016857//racemase and epimerase activity, acting on carbohydrates and derivatives	GO:0019318//hexose metabolic process;GO:0019318//hexose metabolic process;GO:0019318//hexose metabolic process
	osa-miR5161	LOC_Os01g12290	B1-vs-B3	GO:0031410//cytoplasmic vesicle	GO:0004672//protein kinase activity;GO:0000166//nucleotide binding	GO:0009987//cellular process
	osa-miR5161	LOC_Os03g52700	B1-vs-B3	-	-	-
	osa-miR5161	LOC_Os06g06380	B1-vs-B3	-	GO:0032559//adenyl ribonucleotide binding	GO:0012501//programmed cell death;GO:0006950//response to stress
	osa-miR5161	LOC_Os06g43140	B1-vs-B3	-	-	-
	osa-miR529a	LOC_Os01g25484	B1-vs-B3	GO:0043231//intracellular membrane-bounded organelle;GO:0043231//intracellular membrane-bounded organelle;GO:0043231//intracellular membrane-bounded organelle	GO:0051540//metal cluster binding;GO:0005506//iron ion binding;GO:0003824//catalytic activity;GO:0051540//metal cluster binding;GO:0005506//iron ion binding;GO:0003824//catalytic activity;GO:0051540//metal cluster binding;GO:0005506//iron ion binding;GO:0003824//catalytic activity	GO:0008152//metabolic process;GO:0008152//metabolic process;GO:0008152//metabolic process
	osa-miR529a	LOC_Os03g31320	B1-vs-B3	-	GO:0046914//transition metal ion binding;GO:0046914//transition metal ion binding	-
	osa-miR529a	LOC_Os06g27830	B1-vs-B3	-	-	-
	osa-miR529a	LOC_Os10g03620	B1-vs-B3	-	-	-
	osa-miR529a	LOC_Os10g14011	B1-vs-B3	GO:0043231//intracellular membrane-bounded organelle	-	-
	osa-miR529a	LOC_Os10g41560	B1-vs-B3	GO:0043231//intracellular membrane-bounded organelle	-	-
	osa-miR5490	LOC_Os11g37440	B1-vs-B3	-	GO:0004175//endopeptidase activity;GO:0003676//nucleic acid binding;GO:0034061//DNA polymerase activity	GO:0006260//DNA replication;GO:0019538//protein metabolic process
	osa-miR5504	LOC_Os02g16470	B1-vs-B3	-	-	-
	osa-miR5508	LOC_Os03g49980	B1-vs-B3	-	-	-
	osa-miR5508	LOC_Os04g29820	B1-vs-B3	-	-	-
	osa-miR5508	LOC_Os09g12600	B1-vs-B3	GO:0031224//intrinsic to membrane;GO:0043231//intracellular membrane-bounded organelle;GO:0019866//organelle inner membrane;GO:0009941//chloroplast envelope	GO:0005342//organic acid transmembrane transporter activity;GO:0008514//organic anion transmembrane transporter activity;GO:0015291//secondary active transmembrane transporter activity	GO:0051234//establishment of localization;GO:0015711//organic anion transport
	osa-miR5518	LOC_Os04g52180	B1-vs-B3	-	-	-
	osa-miR5518	LOC_Os05g35580	B1-vs-B3*	GO:0043231//intracellular membrane-bounded organelle	GO:0016763//transferase activity, transferring pentosyl groups;GO:0043169//cation binding;GO:0051540//metal cluster binding	GO:0006144//purine nucleobase metabolic process;GO:0006163//purine nucleotide metabolic process
	osa-miR5518	LOC_Os09g36670	B1-vs-B3	GO:0031410//cytoplasmic vesicle;GO:0043231//intracellular membrane-bounded organelle	GO:0016859//cis-trans isomerase activity	GO:0044267//cellular protein metabolic process
	osa-miR5518	LOC_Os10g30370	B1-vs-B3	GO:0043231//intracellular membrane-bounded organelle;GO:0043231//intracellular membrane-bounded organelle	GO:0003676//nucleic acid binding;GO:0003676//nucleic acid binding	GO:0006396//RNA processing;GO:0006396//RNA processing
	osa-miR5817	LOC_Os05g26810	B1-vs-B3	-	GO:0004175//endopeptidase activity;GO:0003676//nucleic acid binding;GO:0034061//DNA polymerase activity	GO:0006260//DNA replication;GO:0019538//protein metabolic process
	osa-miR812a	LOC_Os01g56720	B1-vs-B3	-	-	-
	osa-miR812a	LOC_Os01g71060	B1-vs-B3	-	-	-
	osa-miR812a	LOC_Os02g01520	B1-vs-B3	-	-	-
	osa-miR812a	LOC_Os02g07960	B1-vs-B3	GO:0043231//intracellular membrane-bounded organelle;GO:0044444//cytoplasmic part;GO:0043231//intracellular membrane-bounded organelle;GO:0044444//cytoplasmic part;GO:0043231//intracellular membrane-bounded organelle;GO:0044444//cytoplasmic part	GO:0016301//kinase activity;GO:0032559//adenyl ribonucleotide binding;GO:0016301//kinase activity;GO:0032559//adenyl ribonucleotide binding;GO:0016301//kinase activity;GO:0032559//adenyl ribonucleotide binding	GO:0006464//cellular protein modification process;GO:0006464//cellular protein modification process;GO:0006464//cellular protein modification process
	osa-miR812a	LOC_Os02g23823	B1-vs-B3	GO:0043231//intracellular membrane-bounded organelle;GO:0043231//intracellular membrane-bounded organelle;GO:0043231//intracellular membrane-bounded organelle	GO:0003676//nucleic acid binding;GO:0003676//nucleic acid binding	-
	osa-miR812a	LOC_Os03g12610	B1-vs-B3	GO:0043231//intracellular membrane-bounded organelle;GO:0043231//intracellular membrane-bounded organelle	GO:0003676//nucleic acid binding;GO:0004527//exonuclease activity;GO:0003676//nucleic acid binding;GO:0004527//exonuclease activity	-
	osa-miR812a	LOC_Os03g24730	B1-vs-B3	-	-	-
	osa-miR812a	LOC_Os03g48380	B1-vs-B3	-	-	-
	osa-miR812a	LOC_Os04g20474	B1-vs-B3	-	GO:0016757//transferase activity, transferring glycosyl groups;GO:0016757//transferase activity, transferring glycosyl groups;GO:0016757//transferase activity, transferring glycosyl groups;GO:0016757//transferase activity, transferring glycosyl groups	-
	osa-miR812a	LOC_Os04g58730	B1-vs-B3	-	-	-
	osa-miR812a	LOC_Os06g04830	B1-vs-B3	GO:0031410//cytoplasmic vesicle	-	-
	osa-miR812a	LOC_Os09g02214	B1-vs-B3	GO:0043231//intracellular membrane-bounded organelle;GO:0031224//intrinsic to membrane;GO:0043231//intracellular membrane-bounded organelle;GO:0031224//intrinsic to membrane;GO:0043231//intracellular membrane-bounded organelle;GO:0031224//intrinsic to membrane	GO:0005451//monovalent cation:hydrogen antiporter activity;GO:0015142//tricarboxylic acid transmembrane transporter activity;GO:0005451//monovalent cation:hydrogen antiporter activity;GO:0015142//tricarboxylic acid transmembrane transporter activity;GO:0005451//monovalent cation:hydrogen antiporter activity;GO:0015142//tricarboxylic acid transmembrane transporter activity	GO:0006842//tricarboxylic acid transport;GO:0030001//metal ion transport;GO:0006842//tricarboxylic acid transport;GO:0030001//metal ion transport;GO:0006842//tricarboxylic acid transport;GO:0030001//metal ion transport
	osa-miR812a	LOC_Os11g24120	B1-vs-B3	GO:0043231//intracellular membrane-bounded organelle	-	-
	osa-miR812a	LOC_Os11g31690	B1-vs-B3	-	-	-
	osa-miR812a	LOC_Os11g37540	B1-vs-B3	-	GO:0004672//protein kinase activity;GO:0016787//hydrolase activity;GO:0032559//adenyl ribonucleotide binding	GO:0006464//cellular protein modification process
	osa-miR812a	LOC_Os12g09570	B1-vs-B3	-	GO:0032561//guanyl ribonucleotide binding	-
	osa-miR812a	LOC_Os12g38210	B1-vs-B3	GO:0043234//protein complex	GO:0019787//small conjugating protein ligase activity	GO:0032446//protein modification by small protein conjugation
	osa-miR812b	LOC_Os01g56720	B1-vs-B3	-	-	-
	osa-miR812b	LOC_Os01g71060	B1-vs-B3	-	-	-
	osa-miR812b	LOC_Os02g01520	B1-vs-B3	-	-	-
	osa-miR812b	LOC_Os02g07960	B1-vs-B3	GO:0043231//intracellular membrane-bounded organelle;GO:0044444//cytoplasmic part;GO:0043231//intracellular membrane-bounded organelle;GO:0044444//cytoplasmic part;GO:0043231//intracellular membrane-bounded organelle;GO:0044444//cytoplasmic part	GO:0016301//kinase activity;GO:0032559//adenyl ribonucleotide binding;GO:0016301//kinase activity;GO:0032559//adenyl ribonucleotide binding;GO:0016301//kinase activity;GO:0032559//adenyl ribonucleotide binding	GO:0006464//cellular protein modification process;GO:0006464//cellular protein modification process;GO:0006464//cellular protein modification process
	osa-miR812b	LOC_Os02g23823	B1-vs-B3	GO:0043231//intracellular membrane-bounded organelle;GO:0043231//intracellular membrane-bounded organelle;GO:0043231//intracellular membrane-bounded organelle	GO:0003676//nucleic acid binding;GO:0003676//nucleic acid binding	-
	osa-miR812b	LOC_Os03g12610	B1-vs-B3	GO:0043231//intracellular membrane-bounded organelle;GO:0043231//intracellular membrane-bounded organelle	GO:0003676//nucleic acid binding;GO:0004527//exonuclease activity;GO:0003676//nucleic acid binding;GO:0004527//exonuclease activity	-
	osa-miR812b	LOC_Os03g24730	B1-vs-B3	-	-	-
	osa-miR812b	LOC_Os03g48380	B1-vs-B3	-	-	-
	osa-miR812b	LOC_Os04g20474	B1-vs-B3	-	GO:0016757//transferase activity, transferring glycosyl groups;GO:0016757//transferase activity, transferring glycosyl groups;GO:0016757//transferase activity, transferring glycosyl groups;GO:0016757//transferase activity, transferring glycosyl groups	-
	osa-miR812b	LOC_Os04g58730	B1-vs-B3	-	-	-
	osa-miR812b	LOC_Os06g04830	B1-vs-B3	GO:0031410//cytoplasmic vesicle	-	-
	osa-miR812b	LOC_Os09g02214	B1-vs-B3	GO:0043231//intracellular membrane-bounded organelle;GO:0031224//intrinsic to membrane;GO:0043231//intracellular membrane-bounded organelle;GO:0031224//intrinsic to membrane;GO:0043231//intracellular membrane-bounded organelle;GO:0031224//intrinsic to membrane	GO:0005451//monovalent cation:hydrogen antiporter activity;GO:0015142//tricarboxylic acid transmembrane transporter activity;GO:0005451//monovalent cation:hydrogen antiporter activity;GO:0015142//tricarboxylic acid transmembrane transporter activity;GO:0005451//monovalent cation:hydrogen antiporter activity;GO:0015142//tricarboxylic acid transmembrane transporter activity	GO:0006842//tricarboxylic acid transport;GO:0030001//metal ion transport;GO:0006842//tricarboxylic acid transport;GO:0030001//metal ion transport;GO:0006842//tricarboxylic acid transport;GO:0030001//metal ion transport
	osa-miR812b	LOC_Os11g24120	B1-vs-B3	GO:0043231//intracellular membrane-bounded organelle	-	-
	osa-miR812b	LOC_Os11g31690	B1-vs-B3	-	-	-
	osa-miR812b	LOC_Os11g37540	B1-vs-B3	-	GO:0004672//protein kinase activity;GO:0016787//hydrolase activity;GO:0032559//adenyl ribonucleotide binding	GO:0006464//cellular protein modification process
	osa-miR812b	LOC_Os12g09570	B1-vs-B3	-	GO:0032561//guanyl ribonucleotide binding	-
	osa-miR812b	LOC_Os12g38210	B1-vs-B3	GO:0043234//protein complex	GO:0019787//small conjugating protein ligase activity	GO:0032446//protein modification by small protein conjugation
	osa-miR812c	LOC_Os01g56720	B1-vs-B3	-	-	-
	osa-miR812c	LOC_Os01g71060	B1-vs-B3	-	-	-
	osa-miR812c	LOC_Os02g01520	B1-vs-B3	-	-	-
	osa-miR812c	LOC_Os02g07960	B1-vs-B3	GO:0043231//intracellular membrane-bounded organelle;GO:0044444//cytoplasmic part;GO:0043231//intracellular membrane-bounded organelle;GO:0044444//cytoplasmic part;GO:0043231//intracellular membrane-bounded organelle;GO:0044444//cytoplasmic part	GO:0016301//kinase activity;GO:0032559//adenyl ribonucleotide binding;GO:0016301//kinase activity;GO:0032559//adenyl ribonucleotide binding;GO:0016301//kinase activity;GO:0032559//adenyl ribonucleotide binding	GO:0006464//cellular protein modification process;GO:0006464//cellular protein modification process;GO:0006464//cellular protein modification process
	osa-miR812c	LOC_Os02g23823	B1-vs-B3	GO:0043231//intracellular membrane-bounded organelle;GO:0043231//intracellular membrane-bounded organelle;GO:0043231//intracellular membrane-bounded organelle	GO:0003676//nucleic acid binding;GO:0003676//nucleic acid binding	-
	osa-miR812c	LOC_Os03g12610	B1-vs-B3	GO:0043231//intracellular membrane-bounded organelle;GO:0043231//intracellular membrane-bounded organelle	GO:0003676//nucleic acid binding;GO:0004527//exonuclease activity;GO:0003676//nucleic acid binding;GO:0004527//exonuclease activity	-
	osa-miR812c	LOC_Os03g24730	B1-vs-B3	-	-	-
	osa-miR812c	LOC_Os03g48380	B1-vs-B3	-	-	-
	osa-miR812c	LOC_Os04g20474	B1-vs-B3	-	GO:0016757//transferase activity, transferring glycosyl groups;GO:0016757//transferase activity, transferring glycosyl groups;GO:0016757//transferase activity, transferring glycosyl groups;GO:0016757//transferase activity, transferring glycosyl groups	-
	osa-miR812c	LOC_Os04g58730	B1-vs-B3	-	-	-
	osa-miR812c	LOC_Os06g04830	B1-vs-B3	GO:0031410//cytoplasmic vesicle	-	-
	osa-miR812c	LOC_Os09g02214	B1-vs-B3	GO:0043231//intracellular membrane-bounded organelle;GO:0031224//intrinsic to membrane;GO:0043231//intracellular membrane-bounded organelle;GO:0031224//intrinsic to membrane;GO:0043231//intracellular membrane-bounded organelle;GO:0031224//intrinsic to membrane	GO:0005451//monovalent cation:hydrogen antiporter activity;GO:0015142//tricarboxylic acid transmembrane transporter activity;GO:0005451//monovalent cation:hydrogen antiporter activity;GO:0015142//tricarboxylic acid transmembrane transporter activity;GO:0005451//monovalent cation:hydrogen antiporter activity;GO:0015142//tricarboxylic acid transmembrane transporter activity	GO:0006842//tricarboxylic acid transport;GO:0030001//metal ion transport;GO:0006842//tricarboxylic acid transport;GO:0030001//metal ion transport;GO:0006842//tricarboxylic acid transport;GO:0030001//metal ion transport
	osa-miR812c	LOC_Os11g24120	B1-vs-B3	GO:0043231//intracellular membrane-bounded organelle	-	-
	osa-miR812c	LOC_Os11g31690	B1-vs-B3	-	-	-
	osa-miR812c	LOC_Os11g37540	B1-vs-B3	-	GO:0004672//protein kinase activity;GO:0016787//hydrolase activity;GO:0032559//adenyl ribonucleotide binding	GO:0006464//cellular protein modification process
	osa-miR812c	LOC_Os12g09570	B1-vs-B3	-	GO:0032561//guanyl ribonucleotide binding	-
	osa-miR812c	LOC_Os12g38210	B1-vs-B3	GO:0043234//protein complex	GO:0019787//small conjugating protein ligase activity	GO:0032446//protein modification by small protein conjugation
	osa-miR812d	LOC_Os01g56720	B1-vs-B3	-	-	-
	osa-miR812d	LOC_Os01g71060	B1-vs-B3	-	-	-
	osa-miR812d	LOC_Os02g01520	B1-vs-B3	-	-	-
	osa-miR812d	LOC_Os02g07960	B1-vs-B3	GO:0043231//intracellular membrane-bounded organelle;GO:0044444//cytoplasmic part;GO:0043231//intracellular membrane-bounded organelle;GO:0044444//cytoplasmic part;GO:0043231//intracellular membrane-bounded organelle;GO:0044444//cytoplasmic part	GO:0016301//kinase activity;GO:0032559//adenyl ribonucleotide binding;GO:0016301//kinase activity;GO:0032559//adenyl ribonucleotide binding;GO:0016301//kinase activity;GO:0032559//adenyl ribonucleotide binding	GO:0006464//cellular protein modification process;GO:0006464//cellular protein modification process;GO:0006464//cellular protein modification process
	osa-miR812d	LOC_Os02g23823	B1-vs-B3	GO:0043231//intracellular membrane-bounded organelle;GO:0043231//intracellular membrane-bounded organelle;GO:0043231//intracellular membrane-bounded organelle	GO:0003676//nucleic acid binding;GO:0003676//nucleic acid binding	-
	osa-miR812d	LOC_Os03g12610	B1-vs-B3	GO:0043231//intracellular membrane-bounded organelle;GO:0043231//intracellular membrane-bounded organelle	GO:0003676//nucleic acid binding;GO:0004527//exonuclease activity;GO:0003676//nucleic acid binding;GO:0004527//exonuclease activity	-
	osa-miR812d	LOC_Os03g24730	B1-vs-B3	-	-	-
	osa-miR812d	LOC_Os03g48380	B1-vs-B3	-	-	-
	osa-miR812d	LOC_Os04g20474	B1-vs-B3	-	GO:0016757//transferase activity, transferring glycosyl groups;GO:0016757//transferase activity, transferring glycosyl groups;GO:0016757//transferase activity, transferring glycosyl groups;GO:0016757//transferase activity, transferring glycosyl groups	-
	osa-miR812d	LOC_Os04g58730	B1-vs-B3	-	-	-
	osa-miR812d	LOC_Os06g04830	B1-vs-B3	GO:0031410//cytoplasmic vesicle	-	-
	osa-miR812d	LOC_Os09g02214	B1-vs-B3	GO:0043231//intracellular membrane-bounded organelle;GO:0031224//intrinsic to membrane;GO:0043231//intracellular membrane-bounded organelle;GO:0031224//intrinsic to membrane;GO:0043231//intracellular membrane-bounded organelle;GO:0031224//intrinsic to membrane	GO:0005451//monovalent cation:hydrogen antiporter activity;GO:0015142//tricarboxylic acid transmembrane transporter activity;GO:0005451//monovalent cation:hydrogen antiporter activity;GO:0015142//tricarboxylic acid transmembrane transporter activity;GO:0005451//monovalent cation:hydrogen antiporter activity;GO:0015142//tricarboxylic acid transmembrane transporter activity	GO:0006842//tricarboxylic acid transport;GO:0030001//metal ion transport;GO:0006842//tricarboxylic acid transport;GO:0030001//metal ion transport;GO:0006842//tricarboxylic acid transport;GO:0030001//metal ion transport
	osa-miR812d	LOC_Os11g24120	B1-vs-B3	GO:0043231//intracellular membrane-bounded organelle	-	-
	osa-miR812d	LOC_Os11g31690	B1-vs-B3	-	-	-
	osa-miR812d	LOC_Os11g37540	B1-vs-B3	-	GO:0004672//protein kinase activity;GO:0016787//hydrolase activity;GO:0032559//adenyl ribonucleotide binding	GO:0006464//cellular protein modification process
	osa-miR812d	LOC_Os12g09570	B1-vs-B3	-	GO:0032561//guanyl ribonucleotide binding	-
	osa-miR812d	LOC_Os12g38210	B1-vs-B3	GO:0043234//protein complex	GO:0019787//small conjugating protein ligase activity	GO:0032446//protein modification by small protein conjugation
	osa-miR812e	LOC_Os01g56720	B1-vs-B3	-	-	-
	osa-miR812e	LOC_Os01g71060	B1-vs-B3	-	-	-
	osa-miR812e	LOC_Os02g01520	B1-vs-B3	-	-	-
	osa-miR812e	LOC_Os02g07960	B1-vs-B3	GO:0043231//intracellular membrane-bounded organelle;GO:0044444//cytoplasmic part;GO:0043231//intracellular membrane-bounded organelle;GO:0044444//cytoplasmic part;GO:0043231//intracellular membrane-bounded organelle;GO:0044444//cytoplasmic part	GO:0016301//kinase activity;GO:0032559//adenyl ribonucleotide binding;GO:0016301//kinase activity;GO:0032559//adenyl ribonucleotide binding;GO:0016301//kinase activity;GO:0032559//adenyl ribonucleotide binding	GO:0006464//cellular protein modification process;GO:0006464//cellular protein modification process;GO:0006464//cellular protein modification process
	osa-miR812e	LOC_Os02g23823	B1-vs-B3	GO:0043231//intracellular membrane-bounded organelle;GO:0043231//intracellular membrane-bounded organelle;GO:0043231//intracellular membrane-bounded organelle	GO:0003676//nucleic acid binding;GO:0003676//nucleic acid binding	-
	osa-miR812e	LOC_Os03g12610	B1-vs-B3	GO:0043231//intracellular membrane-bounded organelle;GO:0043231//intracellular membrane-bounded organelle	GO:0003676//nucleic acid binding;GO:0004527//exonuclease activity;GO:0003676//nucleic acid binding;GO:0004527//exonuclease activity	-
	osa-miR812e	LOC_Os03g24730	B1-vs-B3	-	-	-
	osa-miR812e	LOC_Os03g48380	B1-vs-B3	-	-	-
	osa-miR812e	LOC_Os04g20474	B1-vs-B3	-	GO:0016757//transferase activity, transferring glycosyl groups;GO:0016757//transferase activity, transferring glycosyl groups;GO:0016757//transferase activity, transferring glycosyl groups;GO:0016757//transferase activity, transferring glycosyl groups	-
	osa-miR812e	LOC_Os04g58730	B1-vs-B3	-	-	-
	osa-miR812e	LOC_Os06g04830	B1-vs-B3	GO:0031410//cytoplasmic vesicle	-	-
	osa-miR812e	LOC_Os09g02214	B1-vs-B3	GO:0043231//intracellular membrane-bounded organelle;GO:0031224//intrinsic to membrane;GO:0043231//intracellular membrane-bounded organelle;GO:0031224//intrinsic to membrane;GO:0043231//intracellular membrane-bounded organelle;GO:0031224//intrinsic to membrane	GO:0005451//monovalent cation:hydrogen antiporter activity;GO:0015142//tricarboxylic acid transmembrane transporter activity;GO:0005451//monovalent cation:hydrogen antiporter activity;GO:0015142//tricarboxylic acid transmembrane transporter activity;GO:0005451//monovalent cation:hydrogen antiporter activity;GO:0015142//tricarboxylic acid transmembrane transporter activity	GO:0006842//tricarboxylic acid transport;GO:0030001//metal ion transport;GO:0006842//tricarboxylic acid transport;GO:0030001//metal ion transport;GO:0006842//tricarboxylic acid transport;GO:0030001//metal ion transport
	osa-miR812e	LOC_Os11g24120	B1-vs-B3	GO:0043231//intracellular membrane-bounded organelle	-	-
	osa-miR812e	LOC_Os11g31690	B1-vs-B3	-	-	-
	osa-miR812e	LOC_Os11g37540	B1-vs-B3	-	GO:0004672//protein kinase activity;GO:0016787//hydrolase activity;GO:0032559//adenyl ribonucleotide binding	GO:0006464//cellular protein modification process
	osa-miR812e	LOC_Os12g09570	B1-vs-B3	-	GO:0032561//guanyl ribonucleotide binding	-
	osa-miR812e	LOC_Os12g38210	B1-vs-B3	GO:0043234//protein complex	GO:0019787//small conjugating protein ligase activity	GO:0032446//protein modification by small protein conjugation
	osa-miR812f	LOC_Os02g53180	B1-vs-B3	-	GO:0003824//catalytic activity;GO:0003824//catalytic activity;GO:0003824//catalytic activity	GO:0008152//metabolic process;GO:0008152//metabolic process;GO:0008152//metabolic process
	osa-miR812g	LOC_Os02g07960	B1-vs-B3	GO:0043231//intracellular membrane-bounded organelle;GO:0044444//cytoplasmic part;GO:0043231//intracellular membrane-bounded organelle;GO:0044444//cytoplasmic part;GO:0043231//intracellular membrane-bounded organelle;GO:0044444//cytoplasmic part	GO:0016301//kinase activity;GO:0032559//adenyl ribonucleotide binding;GO:0016301//kinase activity;GO:0032559//adenyl ribonucleotide binding;GO:0016301//kinase activity;GO:0032559//adenyl ribonucleotide binding	GO:0006464//cellular protein modification process;GO:0006464//cellular protein modification process;GO:0006464//cellular protein modification process
	osa-miR812g	LOC_Os02g53180	B1-vs-B3	-	GO:0003824//catalytic activity;GO:0003824//catalytic activity;GO:0003824//catalytic activity	GO:0008152//metabolic process;GO:0008152//metabolic process;GO:0008152//metabolic process
	osa-miR812g	LOC_Os11g31690	B1-vs-B3	-	-	-
	osa-miR812h	LOC_Os02g07960	B1-vs-B3	GO:0043231//intracellular membrane-bounded organelle;GO:0044444//cytoplasmic part;GO:0043231//intracellular membrane-bounded organelle;GO:0044444//cytoplasmic part;GO:0043231//intracellular membrane-bounded organelle;GO:0044444//cytoplasmic part	GO:0016301//kinase activity;GO:0032559//adenyl ribonucleotide binding;GO:0016301//kinase activity;GO:0032559//adenyl ribonucleotide binding;GO:0016301//kinase activity;GO:0032559//adenyl ribonucleotide binding	GO:0006464//cellular protein modification process;GO:0006464//cellular protein modification process;GO:0006464//cellular protein modification process
	osa-miR812h	LOC_Os02g53180	B1-vs-B3	-	GO:0003824//catalytic activity;GO:0003824//catalytic activity;GO:0003824//catalytic activity	GO:0008152//metabolic process;GO:0008152//metabolic process;GO:0008152//metabolic process
	osa-miR812h	LOC_Os03g16220	B1-vs-B3	-	GO:0003824//catalytic activity;GO:0003824//catalytic activity;GO:0003824//catalytic activity;GO:0003824//catalytic activity;GO:0003824//catalytic activity;GO:0003824//catalytic activity	GO:0008152//metabolic process;GO:0008152//metabolic process;GO:0008152//metabolic process;GO:0008152//metabolic process;GO:0008152//metabolic process;GO:0008152//metabolic process
	osa-miR812h	LOC_Os03g48380	B1-vs-B3	-	-	-
	osa-miR812h	LOC_Os04g47140	B1-vs-B3	-	-	-
	osa-miR812h	LOC_Os11g31690	B1-vs-B3	-	-	-
	osa-miR812i	LOC_Os02g07960	B1-vs-B3	GO:0043231//intracellular membrane-bounded organelle;GO:0044444//cytoplasmic part;GO:0043231//intracellular membrane-bounded organelle;GO:0044444//cytoplasmic part;GO:0043231//intracellular membrane-bounded organelle;GO:0044444//cytoplasmic part	GO:0016301//kinase activity;GO:0032559//adenyl ribonucleotide binding;GO:0016301//kinase activity;GO:0032559//adenyl ribonucleotide binding;GO:0016301//kinase activity;GO:0032559//adenyl ribonucleotide binding	GO:0006464//cellular protein modification process;GO:0006464//cellular protein modification process;GO:0006464//cellular protein modification process
	osa-miR812i	LOC_Os02g53180	B1-vs-B3	-	GO:0003824//catalytic activity;GO:0003824//catalytic activity;GO:0003824//catalytic activity	GO:0008152//metabolic process;GO:0008152//metabolic process;GO:0008152//metabolic process
	osa-miR812i	LOC_Os11g31690	B1-vs-B3	-	-	-
	osa-miR812j	LOC_Os02g07960	B1-vs-B3	GO:0043231//intracellular membrane-bounded organelle;GO:0044444//cytoplasmic part;GO:0043231//intracellular membrane-bounded organelle;GO:0044444//cytoplasmic part;GO:0043231//intracellular membrane-bounded organelle;GO:0044444//cytoplasmic part	GO:0016301//kinase activity;GO:0032559//adenyl ribonucleotide binding;GO:0016301//kinase activity;GO:0032559//adenyl ribonucleotide binding;GO:0016301//kinase activity;GO:0032559//adenyl ribonucleotide binding	GO:0006464//cellular protein modification process;GO:0006464//cellular protein modification process;GO:0006464//cellular protein modification process
	osa-miR812j	LOC_Os02g53180	B1-vs-B3	-	GO:0003824//catalytic activity;GO:0003824//catalytic activity;GO:0003824//catalytic activity	GO:0008152//metabolic process;GO:0008152//metabolic process;GO:0008152//metabolic process
	osa-miR812j	LOC_Os11g31690	B1-vs-B3	-	-	-
	osa-miR814b	LOC_Os04g22110	B1-vs-B3	-	-	-
	osa-miR814b	LOC_Os09g37400	B1-vs-B3	GO:0043231//intracellular membrane-bounded organelle	GO:0005515//protein binding	GO:0009755//hormone-mediated signaling pathway
	osa-miR815a	LOC_Os02g52210	B1-vs-B3	GO:0031410//cytoplasmic vesicle;GO:0031410//cytoplasmic vesicle	-	-
	osa-miR815a	LOC_Os03g38980	B1-vs-B3	GO:0044424//intracellular part;GO:0044424//intracellular part;GO:0044424//intracellular part	GO:0004812//aminoacyl-tRNA ligase activity;GO:0046872//metal ion binding;GO:0032559//adenyl ribonucleotide binding;GO:0004812//aminoacyl-tRNA ligase activity;GO:0046872//metal ion binding;GO:0032559//adenyl ribonucleotide binding;GO:0004812//aminoacyl-tRNA ligase activity;GO:0046872//metal ion binding;GO:0032559//adenyl ribonucleotide binding	GO:0006418//tRNA aminoacylation for protein translation;GO:0006418//tRNA aminoacylation for protein translation;GO:0006418//tRNA aminoacylation for protein translation
	osa-miR815a	LOC_Os05g46954	B1-vs-B3	-	-	-
	osa-miR815a	LOC_Os10g25130	B1-vs-B3	-	GO:0048037//cofactor binding;GO:0016846//carbon-sulfur lyase activity;GO:0047635//alanine-oxo-acid transaminase activity	GO:0008652//cellular amino acid biosynthetic process
	osa-miR820a	LOC_Os01g16850	B1-vs-B3	GO:0043231//intracellular membrane-bounded organelle	-	-
	osa-miR820a	LOC_Os01g20910	B1-vs-B3	GO:0043231//intracellular membrane-bounded organelle	GO:0046914//transition metal ion binding	-
	osa-miR820a	LOC_Os02g39920	B1-vs-B3	-	-	-
	osa-miR820a	LOC_Os02g45590	B1-vs-B3	GO:0043231//intracellular membrane-bounded organelle	-	GO:0006396//RNA processing
	osa-miR820a	LOC_Os02g50300	B1-vs-B3	-	-	-
	osa-miR820a	LOC_Os03g02010	B1-vs-B3	-	GO:0003676//nucleic acid binding	GO:0006305//DNA alkylation
	osa-miR820a	LOC_Os03g15020	B1-vs-B3*	GO:0031410//cytoplasmic vesicle;GO:0031410//cytoplasmic vesicle;GO:0031410//cytoplasmic vesicle	GO:0030246//carbohydrate binding;GO:0043167//ion binding;GO:0015925;GO:0030246//carbohydrate binding;GO:0043167//ion binding;GO:0015925;GO:0030246//carbohydrate binding;GO:0043167//ion binding;GO:0015925	GO:0044238//primary metabolic process;GO:0044238//primary metabolic process;GO:0044238//primary metabolic process
	osa-miR820a	LOC_Os04g13350	B1-vs-B3	GO:0043231//intracellular membrane-bounded organelle	GO:0003676//nucleic acid binding;GO:0005402//cation:sugar symporter activity	GO:0006259//DNA metabolic process;GO:0008643//carbohydrate transport
	osa-miR820a	LOC_Os05g31210	B1-vs-B3	GO:0043231//intracellular membrane-bounded organelle	GO:0003676//nucleic acid binding;GO:0005402//cation:sugar symporter activity	GO:0006259//DNA metabolic process;GO:0008643//carbohydrate transport
	osa-miR820a	LOC_Os06g19900	B1-vs-B3	-	-	-
	osa-miR820a	LOC_Os07g18970	B1-vs-B3	GO:0043231//intracellular membrane-bounded organelle	-	-
	osa-miR820a	LOC_Os08g11810	B1-vs-B3	-	GO:0003676//nucleic acid binding;GO:0034061//DNA polymerase activity	GO:0006260//DNA replication
	osa-miR820a	LOC_Os08g24410	B1-vs-B3	GO:0043231//intracellular membrane-bounded organelle	-	-
	osa-miR820a	LOC_Os08g40550	B1-vs-B3	GO:0043231//intracellular membrane-bounded organelle	GO:0003676//nucleic acid binding;GO:0005402//cation:sugar symporter activity	GO:0006259//DNA metabolic process;GO:0008643//carbohydrate transport
	osa-miR820a	LOC_Os09g14500	B1-vs-B3	GO:0043231//intracellular membrane-bounded organelle	GO:0003676//nucleic acid binding;GO:0005402//cation:sugar symporter activity	GO:0006259//DNA metabolic process;GO:0008643//carbohydrate transport
	osa-miR820a	LOC_Os09g29810	B1-vs-B3	GO:0043231//intracellular membrane-bounded organelle	GO:0003676//nucleic acid binding;GO:0005402//cation:sugar symporter activity	GO:0006259//DNA metabolic process;GO:0008643//carbohydrate transport
	osa-miR820a	LOC_Os10g29620	B1-vs-B3	GO:0016020//membrane	GO:0004672//protein kinase activity;GO:0032559//adenyl ribonucleotide binding	GO:0006464//cellular protein modification process
	osa-miR820a	LOC_Os11g44190	B1-vs-B3	GO:0043231//intracellular membrane-bounded organelle	-	-
	osa-miR820b	LOC_Os01g16850	B1-vs-B3	GO:0043231//intracellular membrane-bounded organelle	-	-
	osa-miR820b	LOC_Os01g20910	B1-vs-B3	GO:0043231//intracellular membrane-bounded organelle	GO:0046914//transition metal ion binding	-
	osa-miR820b	LOC_Os02g39920	B1-vs-B3	-	-	-
	osa-miR820b	LOC_Os02g45590	B1-vs-B3	GO:0043231//intracellular membrane-bounded organelle	-	GO:0006396//RNA processing
	osa-miR820b	LOC_Os02g50300	B1-vs-B3	-	-	-
	osa-miR820b	LOC_Os03g02010	B1-vs-B3	-	GO:0003676//nucleic acid binding	GO:0006305//DNA alkylation
	osa-miR820b	LOC_Os03g15020	B1-vs-B3*	GO:0031410//cytoplasmic vesicle;GO:0031410//cytoplasmic vesicle;GO:0031410//cytoplasmic vesicle	GO:0030246//carbohydrate binding;GO:0043167//ion binding;GO:0015925;GO:0030246//carbohydrate binding;GO:0043167//ion binding;GO:0015925;GO:0030246//carbohydrate binding;GO:0043167//ion binding;GO:0015925	GO:0044238//primary metabolic process;GO:0044238//primary metabolic process;GO:0044238//primary metabolic process
	osa-miR820b	LOC_Os04g13350	B1-vs-B3	GO:0043231//intracellular membrane-bounded organelle	GO:0003676//nucleic acid binding;GO:0005402//cation:sugar symporter activity	GO:0006259//DNA metabolic process;GO:0008643//carbohydrate transport
	osa-miR820b	LOC_Os05g31210	B1-vs-B3	GO:0043231//intracellular membrane-bounded organelle	GO:0003676//nucleic acid binding;GO:0005402//cation:sugar symporter activity	GO:0006259//DNA metabolic process;GO:0008643//carbohydrate transport
	osa-miR820b	LOC_Os06g19900	B1-vs-B3	-	-	-
	osa-miR820b	LOC_Os07g18970	B1-vs-B3	GO:0043231//intracellular membrane-bounded organelle	-	-
	osa-miR820b	LOC_Os08g11810	B1-vs-B3	-	GO:0003676//nucleic acid binding;GO:0034061//DNA polymerase activity	GO:0006260//DNA replication
	osa-miR820b	LOC_Os08g24410	B1-vs-B3	GO:0043231//intracellular membrane-bounded organelle	-	-
	osa-miR820b	LOC_Os08g40550	B1-vs-B3	GO:0043231//intracellular membrane-bounded organelle	GO:0003676//nucleic acid binding;GO:0005402//cation:sugar symporter activity	GO:0006259//DNA metabolic process;GO:0008643//carbohydrate transport
	osa-miR820b	LOC_Os09g14500	B1-vs-B3	GO:0043231//intracellular membrane-bounded organelle	GO:0003676//nucleic acid binding;GO:0005402//cation:sugar symporter activity	GO:0006259//DNA metabolic process;GO:0008643//carbohydrate transport
	osa-miR820b	LOC_Os09g29810	B1-vs-B3	GO:0043231//intracellular membrane-bounded organelle	GO:0003676//nucleic acid binding;GO:0005402//cation:sugar symporter activity	GO:0006259//DNA metabolic process;GO:0008643//carbohydrate transport
	osa-miR820b	LOC_Os10g29620	B1-vs-B3	GO:0016020//membrane	GO:0004672//protein kinase activity;GO:0032559//adenyl ribonucleotide binding	GO:0006464//cellular protein modification process
	osa-miR820b	LOC_Os11g44190	B1-vs-B3	GO:0043231//intracellular membrane-bounded organelle	-	-
	osa-miR820c	LOC_Os01g16850	B1-vs-B3	GO:0043231//intracellular membrane-bounded organelle	-	-
	osa-miR820c	LOC_Os01g20910	B1-vs-B3	GO:0043231//intracellular membrane-bounded organelle	GO:0046914//transition metal ion binding	-
	osa-miR820c	LOC_Os02g39920	B1-vs-B3	-	-	-
	osa-miR820c	LOC_Os02g45590	B1-vs-B3	GO:0043231//intracellular membrane-bounded organelle	-	GO:0006396//RNA processing
	osa-miR820c	LOC_Os02g50300	B1-vs-B3	-	-	-
	osa-miR820c	LOC_Os03g02010	B1-vs-B3	-	GO:0003676//nucleic acid binding	GO:0006305//DNA alkylation
	osa-miR820c	LOC_Os03g15020	B1-vs-B3*	GO:0031410//cytoplasmic vesicle;GO:0031410//cytoplasmic vesicle;GO:0031410//cytoplasmic vesicle	GO:0030246//carbohydrate binding;GO:0043167//ion binding;GO:0015925;GO:0030246//carbohydrate binding;GO:0043167//ion binding;GO:0015925;GO:0030246//carbohydrate binding;GO:0043167//ion binding;GO:0015925	GO:0044238//primary metabolic process;GO:0044238//primary metabolic process;GO:0044238//primary metabolic process
	osa-miR820c	LOC_Os04g13350	B1-vs-B3	GO:0043231//intracellular membrane-bounded organelle	GO:0003676//nucleic acid binding;GO:0005402//cation:sugar symporter activity	GO:0006259//DNA metabolic process;GO:0008643//carbohydrate transport
	osa-miR820c	LOC_Os05g31210	B1-vs-B3	GO:0043231//intracellular membrane-bounded organelle	GO:0003676//nucleic acid binding;GO:0005402//cation:sugar symporter activity	GO:0006259//DNA metabolic process;GO:0008643//carbohydrate transport
	osa-miR820c	LOC_Os06g19900	B1-vs-B3	-	-	-
	osa-miR820c	LOC_Os07g18970	B1-vs-B3	GO:0043231//intracellular membrane-bounded organelle	-	-
	osa-miR820c	LOC_Os08g11810	B1-vs-B3	-	GO:0003676//nucleic acid binding;GO:0034061//DNA polymerase activity	GO:0006260//DNA replication
	osa-miR820c	LOC_Os08g24410	B1-vs-B3	GO:0043231//intracellular membrane-bounded organelle	-	-
	osa-miR820c	LOC_Os08g40550	B1-vs-B3	GO:0043231//intracellular membrane-bounded organelle	GO:0003676//nucleic acid binding;GO:0005402//cation:sugar symporter activity	GO:0006259//DNA metabolic process;GO:0008643//carbohydrate transport
	osa-miR820c	LOC_Os09g14500	B1-vs-B3	GO:0043231//intracellular membrane-bounded organelle	GO:0003676//nucleic acid binding;GO:0005402//cation:sugar symporter activity	GO:0006259//DNA metabolic process;GO:0008643//carbohydrate transport
	osa-miR820c	LOC_Os09g29810	B1-vs-B3	GO:0043231//intracellular membrane-bounded organelle	GO:0003676//nucleic acid binding;GO:0005402//cation:sugar symporter activity	GO:0006259//DNA metabolic process;GO:0008643//carbohydrate transport
	osa-miR820c	LOC_Os10g29620	B1-vs-B3	GO:0016020//membrane	GO:0004672//protein kinase activity;GO:0032559//adenyl ribonucleotide binding	GO:0006464//cellular protein modification process
	osa-miR820c	LOC_Os11g44190	B1-vs-B3	GO:0043231//intracellular membrane-bounded organelle	-	-
	osa-miR1432-5p	LOC_Os04g51610	B1-vs-B3, A1-vs-B1	GO:0031224//intrinsic to membrane;GO:0031224//intrinsic to membrane	GO:0046873//metal ion transmembrane transporter activity;GO:0019829//cation-transporting ATPase activity;GO:0005515//protein binding;GO:0032559//adenyl ribonucleotide binding;GO:0046873//metal ion transmembrane transporter activity;GO:0019829//cation-transporting ATPase activity;GO:0032559//adenyl ribonucleotide binding	GO:0051707//response to other organism;GO:0009206//purine ribonucleoside triphosphate biosynthetic process;GO:0006816//calcium ion transport;GO:0009206//purine ribonucleoside triphosphate biosynthetic process;GO:0006816//calcium ion transport
	osa-miR2093-3p	LOC_Os04g59460	B1-vs-B3, A1-vs-B1	GO:0031461//cullin-RING ubiquitin ligase complex;GO:0043231//intracellular membrane-bounded organelle	GO:0005488//binding	GO:0048608//reproductive structure development;GO:0048827//phyllome development;GO:0009791//post-embryonic development
	osa-miR2093-3p	LOC_Os10g04342	B1-vs-B3, A1-vs-B1	-	-	-
	osa-miR5490	LOC_Os03g42464	B1-vs-B3, A1-vs-B1	GO:0031410//cytoplasmic vesicle	-	-
	osa-miR5491	LOC_Os05g48200	B1-vs-B3, A1-vs-B1	-	GO:0045181//glutamate synthase activity, NAD(P)H as acceptor;GO:0046914//transition metal ion binding;GO:0051540//metal cluster binding;GO:0050662//coenzyme binding;GO:0000166//nucleotide binding	GO:0006536//glutamate metabolic process
	osa-miR5504	LOC_Os03g58730	B1-vs-B3, A1-vs-B1	-	-	-
	osa-miR812g	LOC_Os03g16220	B1-vs-B3, A1-vs-B1	-	GO:0003824//catalytic activity;GO:0003824//catalytic activity;GO:0003824//catalytic activity;GO:0003824//catalytic activity;GO:0003824//catalytic activity;GO:0003824//catalytic activity	GO:0008152//metabolic process;GO:0008152//metabolic process;GO:0008152//metabolic process;GO:0008152//metabolic process;GO:0008152//metabolic process;GO:0008152//metabolic process
	osa-miR812g	LOC_Os03g48380	B1-vs-B3, A1-vs-B1	-	-	-
	osa-miR812g	LOC_Os04g47140	B1-vs-B3, A1-vs-B1	-	-	-
	osa-miR812i	LOC_Os03g16220	B1-vs-B3, A1-vs-B1	-	GO:0003824//catalytic activity;GO:0003824//catalytic activity;GO:0003824//catalytic activity;GO:0003824//catalytic activity;GO:0003824//catalytic activity;GO:0003824//catalytic activity	GO:0008152//metabolic process;GO:0008152//metabolic process;GO:0008152//metabolic process;GO:0008152//metabolic process;GO:0008152//metabolic process;GO:0008152//metabolic process
	osa-miR812i	LOC_Os03g48380	B1-vs-B3, A1-vs-B1	-	-	-
	osa-miR812i	LOC_Os04g47140	B1-vs-B3, A1-vs-B1	-	-	-
	osa-miR812j	LOC_Os03g16220	B1-vs-B3, A1-vs-B1	-	GO:0003824//catalytic activity;GO:0003824//catalytic activity;GO:0003824//catalytic activity;GO:0003824//catalytic activity;GO:0003824//catalytic activity;GO:0003824//catalytic activity	GO:0008152//metabolic process;GO:0008152//metabolic process;GO:0008152//metabolic process;GO:0008152//metabolic process;GO:0008152//metabolic process;GO:0008152//metabolic process
	osa-miR812j	LOC_Os03g48380	B1-vs-B3, A1-vs-B1	-	-	-
	osa-miR812j	LOC_Os04g47140	B1-vs-B3, A1-vs-B1	-	-	-
	osa-miR814b	LOC_Os12g01510	B1-vs-B3*, A1-vs-B1	GO:0031410//cytoplasmic vesicle;GO:0031410//cytoplasmic vesicle;GO:0031410//cytoplasmic vesicle;GO:0031410//cytoplasmic vesicle	-	-
	osa-miR5817	LOC_Os12g38180	B1-vs-B3, A2-vs-B2	-	GO:0016628//oxidoreductase activity, acting on the CH-CH group of donors, NAD or NADP as acceptor;GO:0032559//adenyl ribonucleotide binding	GO:0008152//metabolic process;GO:0050896//response to stimulus
	osa-miR171c-5p	LOC_Os02g44370	B1-vs-B3, A3-vs-B3	-	-	-
	osa-miR396a-5p	LOC_Os02g45570	B1-vs-B3, A3-vs-B3	-	-	-
	osa-miR396b-5p	LOC_Os02g45570	B1-vs-B3, A3-vs-B3	-	-	-
	osa-miR812f	LOC_Os03g48380	B1-vs-B3, A3-vs-B3	-	-	-
	osa-miR160d-3p	LOC_Os04g46220	B2-vs-B3	-	-	-
	osa-miR164b	LOC_Os08g38340	B2-vs-B3	-	-	-
	osa-miR164c	LOC_Os08g38340	B2-vs-B3	-	-	-
	osa-miR164f	LOC_Os08g38340	B2-vs-B3	-	-	-
	osa-miR172a	LOC_Os01g56670	B2-vs-B3	GO:0043231//intracellular membrane-bounded organelle;GO:0043231//intracellular membrane-bounded organelle;GO:0043231//intracellular membrane-bounded organelle;GO:0043231//intracellular membrane-bounded organelle	GO:0046872//metal ion binding;GO:0015924;GO:0046872//metal ion binding;GO:0015924;GO:0046872//metal ion binding;GO:0015924;GO:0046872//metal ion binding;GO:0015924	-
	osa-miR172a	LOC_Os04g55560	B2-vs-B3	-	-	-
	osa-miR172d-3p	LOC_Os01g56670	B2-vs-B3	GO:0043231//intracellular membrane-bounded organelle;GO:0043231//intracellular membrane-bounded organelle;GO:0043231//intracellular membrane-bounded organelle;GO:0043231//intracellular membrane-bounded organelle	GO:0046872//metal ion binding;GO:0015924;GO:0046872//metal ion binding;GO:0015924;GO:0046872//metal ion binding;GO:0015924;GO:0046872//metal ion binding;GO:0015924	-
	osa-miR172d-3p	LOC_Os04g55560	B2-vs-B3	-	-	-
	osa-miR1862a	LOC_Os07g28090	B2-vs-B3	GO:0043231//intracellular membrane-bounded organelle;GO:0016020//membrane	GO:0042626//ATPase activity, coupled to transmembrane movement of substances;GO:0000166//nucleotide binding	GO:0009987//cellular process;GO:0006810//transport
	osa-miR1862c	LOC_Os07g28090	B2-vs-B3	GO:0043231//intracellular membrane-bounded organelle;GO:0016020//membrane	GO:0042626//ATPase activity, coupled to transmembrane movement of substances;GO:0000166//nucleotide binding	GO:0009987//cellular process;GO:0006810//transport
	osa-miR319b	LOC_Os07g05720	B2-vs-B3	-	-	GO:0006351//transcription, DNA-dependent;GO:0009887//organ morphogenesis;GO:0040034//regulation of development, heterochronic;GO:0048827//phyllome development;GO:0048869//cellular developmental process
	osa-miR319b	LOC_Os11g44340	B2-vs-B3	-	GO:0005515//protein binding	-
	osa-miR319b	LOC_Os12g42190	B2-vs-B3	-	-	-
	osa-miR408-3p	LOC_Os02g08150	B2-vs-B3	-	-	-
	osa-miR408-3p	LOC_Os03g50160	B2-vs-B3	GO:0031410//cytoplasmic vesicle	GO:0046914//transition metal ion binding	-
	osa-miR408-3p	LOC_Os04g10210	B2-vs-B3	-	-	-
	osa-miR408-3p	LOC_Os05g11650	B2-vs-B3	-	-	-
	osa-miR408-3p	LOC_Os12g13990	B2-vs-B3	-	-	-
	osa-miR408-5p	LOC_Os02g55030	B2-vs-B3	GO:0044444//cytoplasmic part;GO:0043231//intracellular membrane-bounded organelle	GO:0005488//binding;GO:0008238//exopeptidase activity	GO:0019538//protein metabolic process
	osa-miR408-5p	LOC_Os03g43570	B2-vs-B3	-	-	-
	osa-miR408-5p	LOC_Os07g31530	B2-vs-B3	-	-	-
	osa-miR408-5p	LOC_Os12g18320	B2-vs-B3	-	-	-
	osa-miR528-5p	LOC_Os01g44330	B2-vs-B3*	GO:0005576//extracellular region	GO:0046914//transition metal ion binding;GO:0016682//oxidoreductase activity, acting on diphenols and related substances as donors, oxygen as acceptor	GO:0009808//lignin metabolic process
	osa-miR528-5p	LOC_Os03g50160	B2-vs-B3	GO:0031410//cytoplasmic vesicle	GO:0046914//transition metal ion binding	-
	osa-miR528-5p	LOC_Os06g06050	B2-vs-B3	GO:0043231//intracellular membrane-bounded organelle;GO:0043234//protein complex	-	GO:0009314//response to radiation;GO:0060918//auxin transport;GO:0044267//cellular protein metabolic process;GO:0009933//meristem structural organization;GO:0006950//response to stress
	osa-miR528-5p	LOC_Os06g37160	B2-vs-B3	GO:0031090//organelle membrane;GO:0043231//intracellular membrane-bounded organelle;GO:0031224//intrinsic to membrane	-	GO:0072503//cellular divalent inorganic cation homeostasis
	osa-miR528-5p	LOC_Os06g49350	B2-vs-B3	-	-	-
	osa-miR528-5p	LOC_Os08g03240	B2-vs-B3	GO:0031410//cytoplasmic vesicle	-	-
	osa-miR528-5p	LOC_Os08g31980	B2-vs-B3	-	GO:0019203//carbohydrate phosphatase activity;GO:0035251//UDP-glucosyltransferase activity	GO:0005991//trehalose metabolic process
	osa-miR528-5p	LOC_Os08g36420	B2-vs-B3	-	-	GO:0006810//transport;GO:0006810//transport;GO:0006810//transport;GO:0006810//transport;GO:0006810//transport
	osa-miR528-5p	LOC_Os12g36620	B2-vs-B3	-	-	-
	osa-miR528-5p	LOC_Os12g37430	B2-vs-B3	GO:0043231//intracellular membrane-bounded organelle;GO:0043231//intracellular membrane-bounded organelle;GO:0043231//intracellular membrane-bounded organelle	-	-
	osa-miR529a	LOC_Os01g03050	B2-vs-B3	GO:0043231//intracellular membrane-bounded organelle	GO:0003824//catalytic activity	GO:0008152//metabolic process
	osa-miR529a	LOC_Os01g40260	B2-vs-B3	-	GO:0003677//DNA binding	-
	osa-miR529a	LOC_Os01g49154	B2-vs-B3	-	GO:0016772//transferase activity, transferring phosphorus-containing groups	-
	osa-miR529a	LOC_Os02g13020	B2-vs-B3	GO:0009536//plastid	GO:0046872//metal ion binding;GO:0003824//catalytic activity	-
	osa-miR529a	LOC_Os04g46350	B2-vs-B3	GO:0043231//intracellular membrane-bounded organelle	GO:0003677//DNA binding;GO:0001071//nucleic acid binding transcription factor activity	GO:0006351//transcription, DNA-dependent
	osa-miR529a	LOC_Os04g49220	B2-vs-B3	-	GO:0016301//kinase activity;GO:0032559//adenyl ribonucleotide binding	GO:0006464//cellular protein modification process
	osa-miR5506	LOC_Os05g45410	B2-vs-B3	GO:0043231//intracellular membrane-bounded organelle	GO:0003676//nucleic acid binding;GO:0001071//nucleic acid binding transcription factor activity	GO:0006351//transcription, DNA-dependent
	osa-miR6250	LOC_Os07g33670	B2-vs-B3	-	-	GO:0008152//metabolic process
	osa-miR6253	LOC_Os02g13170	B2-vs-B3	GO:0031224//intrinsic to membrane;GO:0043231//intracellular membrane-bounded organelle	-	GO:0051234//establishment of localization
	osa-miR164b	LOC_Os12g05260	B2-vs-B3, A1-vs-B1	-	-	-
	osa-miR164f	LOC_Os12g05260	B2-vs-B3, A1-vs-B1	-	-	-
	osa-miR5487	LOC_Os09g14610	B2-vs-B3, A1-vs-B1	GO:0044464//cell part	GO:0003723//RNA binding;GO:0016891//endoribonuclease activity, producing 5'-phosphomonoesters;GO:0017111//nucleoside-triphosphatase activity;GO:0003723//RNA binding;GO:0016891//endoribonuclease activity, producing 5'-phosphomonoesters;GO:0042623//ATPase activity, coupled;GO:0032559//adenyl ribonucleotide binding;GO:0003723//RNA binding;GO:0016891//endoribonuclease activity, producing 5'-phosphomo…	GO:0010467//gene expression
	osa-miR5497	LOC_Os03g16824	B2-vs-B3, A1-vs-B1	-	-	-
	osa-miR159a.2	LOC_Os02g54540	B2-vs-B3, A2-vs-B2	GO:0031410//cytoplasmic vesicle	-	GO:0050896//response to stimulus
	osa-miR160d-3p	LOC_Os04g56480	B2-vs-B3, A2-vs-B2	GO:0044464//cell part;GO:0044464//cell part;GO:0044464//cell part	-	GO:0022403//cell cycle phase;GO:0006412//translation;GO:0022403//cell cycle phase;GO:0006412//translation;GO:0022403//cell cycle phase;GO:0006412//translation
	osa-miR2863c	LOC_Os09g35920	B2-vs-B3, A2-vs-B2	GO:0043234//protein complex;GO:0043234//protein complex	-	GO:0006355//regulation of transcription, DNA-dependent;GO:0006355//regulation of transcription, DNA-dependent
	osa-miR408-5p	LOC_Os11g06420	B2-vs-B3, A2-vs-B2	-	-	-
	osa-miR528-5p	LOC_Os02g33770	B2-vs-B3, A2-vs-B2	-	-	-
	osa-miR166k-5p	LOC_Os09g13940	B2-vs-B3, A2-vs-B2, A1-vs-B1	-	-	GO:0006351//transcription, DNA-dependent;GO:0006351//transcription, DNA-dependent;GO:0006351//transcription, DNA-dependent;GO:0006351//transcription, DNA-dependent
	osa-miR164c	LOC_Os02g36880	B2-vs-B3, B1-vs-B3	GO:0043231//intracellular membrane-bounded organelle;GO:0043231//intracellular membrane-bounded organelle;GO:0043231//intracellular membrane-bounded organelle;GO:0043231//intracellular membrane-bounded organelle	GO:0003676//nucleic acid binding;GO:0003676//nucleic acid binding;GO:0003676//nucleic acid binding;GO:0003676//nucleic acid binding	-
	osa-miR1862a	LOC_Os01g40630	B2-vs-B3, B1-vs-B3	GO:0043231//intracellular membrane-bounded organelle;GO:0043231//intracellular membrane-bounded organelle;GO:0043231//intracellular membrane-bounded organelle	GO:0003824//catalytic activity;GO:0003824//catalytic activity;GO:0003824//catalytic activity	GO:0003002//regionalization;GO:0010075//regulation of meristem growth;GO:0010074//maintenance of meristem identity;GO:0009690//cytokinin metabolic process;GO:0003002//regionalization;GO:0010075//regulation of meristem growth;GO:0010074//maintenance of meristem identity;GO:0009690//cytokinin metabolic process;GO:0003002//regionalization;GO:0010075//regulation of meristem growth;GO:0010074//mainten…
	osa-miR1862a	LOC_Os02g37694	B2-vs-B3, B1-vs-B3	-	-	-
	osa-miR1862c	LOC_Os01g40630	B2-vs-B3, B1-vs-B3	GO:0043231//intracellular membrane-bounded organelle;GO:0043231//intracellular membrane-bounded organelle;GO:0043231//intracellular membrane-bounded organelle	GO:0003824//catalytic activity;GO:0003824//catalytic activity;GO:0003824//catalytic activity	GO:0003002//regionalization;GO:0010075//regulation of meristem growth;GO:0010074//maintenance of meristem identity;GO:0009690//cytokinin metabolic process;GO:0003002//regionalization;GO:0010075//regulation of meristem growth;GO:0010074//maintenance of meristem identity;GO:0009690//cytokinin metabolic process;GO:0003002//regionalization;GO:0010075//regulation of meristem growth;GO:0010074//mainten…
	osa-miR1862c	LOC_Os02g37694	B2-vs-B3, B1-vs-B3	-	-	-
	osa-miR319a-3p	LOC_Os02g43860	B2-vs-B3, B1-vs-B3	GO:0031090//organelle membrane;GO:0031090//organelle membrane;GO:0031224//intrinsic to membrane	GO:0015171//amino acid transmembrane transporter activity;GO:0015171//amino acid transmembrane transporter activity	GO:0006865//amino acid transport;GO:0006865//amino acid transport
	osa-miR319b	LOC_Os10g38060	B2-vs-B3, B1-vs-B3	-	GO:0035091//phosphatidylinositol binding;GO:0004620//phospholipase activity;GO:0035091//phosphatidylinositol binding;GO:0004620//phospholipase activity	GO:0042742//defense response to bacterium;GO:0010038//response to metal ion;GO:0042742//defense response to bacterium;GO:0010038//response to metal ion
	osa-miR394	LOC_Os03g13820	B2-vs-B3, B1-vs-B3	-	GO:0004672//protein kinase activity;GO:0032559//adenyl ribonucleotide binding;GO:0004672//protein kinase activity;GO:0032559//adenyl ribonucleotide binding	GO:0050896//response to stimulus;GO:0006464//cellular protein modification process;GO:0050896//response to stimulus;GO:0006464//cellular protein modification process
	osa-miR394	LOC_Os03g14510	B2-vs-B3, B1-vs-B3	GO:0043231//intracellular membrane-bounded organelle;GO:0043231//intracellular membrane-bounded organelle	GO:0008079//translation termination factor activity;GO:0008079//translation termination factor activity	GO:0006412//translation;GO:0006412//translation
	osa-miR394	LOC_Os04g38520	B2-vs-B3, B1-vs-B3	GO:0031410//cytoplasmic vesicle	-	-
	osa-miR394	LOC_Os12g24400	B2-vs-B3, B1-vs-B3	-	-	-
	osa-miR529a	LOC_Os01g39970	B2-vs-B3*, B1-vs-B3*	-	GO:0004713//protein tyrosine kinase activity;GO:0032559//adenyl ribonucleotide binding	GO:0050896//response to stimulus;GO:0006464//cellular protein modification process
	osa-miR529a	LOC_Os01g60960	B2-vs-B3, B1-vs-B3	GO:0043231//intracellular membrane-bounded organelle	GO:0005488//binding	-
	osa-miR529a	LOC_Os02g55890	B2-vs-B3*, B1-vs-B3*	GO:0031090//organelle membrane;GO:0043231//intracellular membrane-bounded organelle;GO:0016021//integral to membrane;GO:0031410//cytoplasmic vesicle	GO:0046872//metal ion binding;GO:0015405//P-P-bond-hydrolysis-driven transmembrane transporter activity;GO:0016462//pyrophosphatase activity	GO:0006818//hydrogen transport
	osa-miR529a	LOC_Os03g07530	B2-vs-B3*, B1-vs-B3	-	-	-
	osa-miR529a	LOC_Os03g51700	B2-vs-B3, B1-vs-B3	-	-	-
	osa-miR529a	LOC_Os04g46290	B2-vs-B3, B1-vs-B3	-	-	-
	osa-miR529a	LOC_Os05g33820	B2-vs-B3, B1-vs-B3	GO:0031410//cytoplasmic vesicle	-	-
	osa-miR529a	LOC_Os05g34130	B2-vs-B3, B1-vs-B3	-	-	-
	osa-miR529a	LOC_Os07g01710	B2-vs-B3, B1-vs-B3	GO:0009536//plastid;GO:0016020//membrane	GO:0004672//protein kinase activity;GO:0004872//receptor activity;GO:0000166//nucleotide binding	GO:0009987//cellular process;GO:0008152//metabolic process;GO:0006950//response to stress
	osa-miR529a	LOC_Os07g39090	B2-vs-B3, B1-vs-B3	-	-	-
	osa-miR529a	LOC_Os10g31864	B2-vs-B3, B1-vs-B3	GO:0043231//intracellular membrane-bounded organelle	-	-
	osa-miR529a	LOC_Os10g35770	B2-vs-B3*, B1-vs-B3	GO:0043231//intracellular membrane-bounded organelle;GO:0043231//intracellular membrane-bounded organelle;GO:0043231//intracellular membrane-bounded organelle	-	-
	osa-miR529a	LOC_Os11g12240	B2-vs-B3, B1-vs-B3	-	GO:0032559//adenyl ribonucleotide binding	GO:0012501//programmed cell death;GO:0006950//response to stress
	osa-miR529a	LOC_Os11g31890	B2-vs-B3, B1-vs-B3*	GO:0043231//intracellular membrane-bounded organelle	GO:0005515//protein binding;GO:0016787//hydrolase activity	GO:0006970//response to osmotic stress;GO:0048764//trichoblast maturation;GO:0009738//abscisic acid mediated signaling pathway;GO:0003006//developmental process involved in reproduction
	osa-miR529a	LOC_Os11g48080	B2-vs-B3, B1-vs-B3	-	-	GO:0008614//pyridoxine metabolic process;GO:0050896//response to stimulus;GO:0009108//coenzyme biosynthetic process
	osa-miR6253	LOC_Os02g48990	B2-vs-B3, B1-vs-B3	GO:0044464//cell part	-	GO:0051234//establishment of localization
	osa-miR164a	LOC_Os04g19260	B2-vs-B3, B1-vs-B3, A1-vs-B1, A1-vs-A3	-	GO:0003676//nucleic acid binding;GO:0034061//DNA polymerase activity	GO:0006260//DNA replication
	osa-miR164b	LOC_Os02g36880	B2-vs-B3, B1-vs-B3, A1-vs-B1	GO:0043231//intracellular membrane-bounded organelle;GO:0043231//intracellular membrane-bounded organelle;GO:0043231//intracellular membrane-bounded organelle;GO:0043231//intracellular membrane-bounded organelle	GO:0003676//nucleic acid binding;GO:0003676//nucleic acid binding;GO:0003676//nucleic acid binding;GO:0003676//nucleic acid binding	-
	osa-miR164b	LOC_Os04g40970	B2-vs-B3, B1-vs-B3, A1-vs-B1	GO:0043231//intracellular membrane-bounded organelle	GO:0042623//ATPase activity, coupled;GO:0032559//adenyl ribonucleotide binding	GO:0006259//DNA metabolic process;GO:0009414//response to water deprivation
	osa-miR164f	LOC_Os02g36880	B2-vs-B3, B1-vs-B3, A1-vs-B1	GO:0043231//intracellular membrane-bounded organelle;GO:0043231//intracellular membrane-bounded organelle;GO:0043231//intracellular membrane-bounded organelle;GO:0043231//intracellular membrane-bounded organelle	GO:0003676//nucleic acid binding;GO:0003676//nucleic acid binding;GO:0003676//nucleic acid binding;GO:0003676//nucleic acid binding	-
	osa-miR164f	LOC_Os04g40970	B2-vs-B3, B1-vs-B3, A1-vs-B1	GO:0043231//intracellular membrane-bounded organelle	GO:0042623//ATPase activity, coupled;GO:0032559//adenyl ribonucleotide binding	GO:0006259//DNA metabolic process;GO:0009414//response to water deprivation
	osa-miR172a	LOC_Os02g38580	B2-vs-B3, B1-vs-B3, A1-vs-B1	-	-	-
	osa-miR172a	LOC_Os05g45980	B2-vs-B3, B1-vs-B3, A1-vs-B1	-	-	-
	osa-miR172a	LOC_Os06g49310	B2-vs-B3, B1-vs-B3, A1-vs-B1	GO:0044464//cell part;GO:0044464//cell part	GO:0015291//secondary active transmembrane transporter activity;GO:0015291//secondary active transmembrane transporter activity	GO:0015893//drug transport;GO:0015893//drug transport
	osa-miR172d-3p	LOC_Os02g38580	B2-vs-B3, B1-vs-B3, A1-vs-B1	-	-	-
	osa-miR172d-3p	LOC_Os05g45980	B2-vs-B3, B1-vs-B3, A1-vs-B1	-	-	-
	osa-miR172d-3p	LOC_Os06g49310	B2-vs-B3, B1-vs-B3, A1-vs-B1	GO:0044464//cell part;GO:0044464//cell part	GO:0015291//secondary active transmembrane transporter activity;GO:0015291//secondary active transmembrane transporter activity	GO:0015893//drug transport;GO:0015893//drug transport
	osa-miR5506	LOC_Os07g46080	B2-vs-B3, B1-vs-B3, A1-vs-B1	GO:0044464//cell part	-	-
	osa-miR166k-5p	LOC_Os12g03250	B2-vs-B3, B1-vs-B3, A2-vs-B2	GO:0043231//intracellular membrane-bounded organelle	-	-
	osa-miR394	LOC_Os02g10700	B2-vs-B3, B1-vs-B3, A2-vs-B2	-	-	-
	osa-miR812f	LOC_Os02g07960	B2-vs-B3, B1-vs-B3, A3-vs-B3	GO:0043231//intracellular membrane-bounded organelle;GO:0044444//cytoplasmic part;GO:0043231//intracellular membrane-bounded organelle;GO:0044444//cytoplasmic part;GO:0043231//intracellular membrane-bounded organelle;GO:0044444//cytoplasmic part	GO:0016301//kinase activity;GO:0032559//adenyl ribonucleotide binding;GO:0016301//kinase activity;GO:0032559//adenyl ribonucleotide binding;GO:0016301//kinase activity;GO:0032559//adenyl ribonucleotide binding	GO:0006464//cellular protein modification process;GO:0006464//cellular protein modification process;GO:0006464//cellular protein modification process
	osa-miR812f	LOC_Os04g47140	B2-vs-B3, B1-vs-B3, A3-vs-B3	-	-	-
