# Supplementary material for: Genetic Subtraction Profiling Identifies Candidate miRNAs Involved in Rice Female Gametophyte Abortion
Source: G3 (Bethesda). 2017 May 19;7(7):2281–93. doi: 10.1534/g3.117.040808 (PMC5499135; doi:10.1534/g3.117.040808)
Supplement: Supplementary file 8 [file 2281TableS6.xlsx]

## Sheet: Sheet1
	Table S6 The GO terms which were enriched by coherant target genes of differentially expressed known miRNAs in different comparisons. If corrected P-value ≤ 0.05, the GO term is defined as coherant target genes significantly enriched GO term.
		GO ID	Term	P-value	Corrected P-value
	A2-VS-A3	GO:0032774	RNA biosynthetic process	0.0002823	0.030959
		GO:0006350	transcription	0.0002823	0.030959
		GO:0006351	transcription, DNA-dependent	0.0002823	0.030959
		GO:0016628	oxidoreductase activity, acting on the CH-CH group of donors, NAD or NADP as acceptor	0.000018129	0.0029007
		GO:0016627	oxidoreductase activity, acting on the CH-CH group of donors	0.00017596	0.014076
		GO:0016491	oxidoreductase activity	0.00067556	0.03603
	A1-VS-A3	GO:0034645	cellular macromolecule biosynthetic process	0.000002693	0.00068133
		GO:0009059	macromolecule biosynthetic process	0.000002693	0.00068133
		GO:0090304	nucleic acid metabolic process	0.000075566	0.012746
		GO:0032774	RNA biosynthetic process	0.00036916	0.031133
		GO:0006350	transcription	0.00036916	0.031133
		GO:0006351	transcription, DNA-dependent	0.00036916	0.031133
		GO:0003676	nucleic acid binding	0.00000097562	0.00022342
		GO:0016628	oxidoreductase activity, acting on the CH-CH group of donors, NAD or NADP as acceptor	0.00002463	0.0024996
		GO:0004175	endopeptidase activity	0.000032745	0.0024996
		GO:0016627	oxidoreductase activity, acting on the CH-CH group of donors	0.00041009	0.023478
	B1-VS-B2	GO:0090304	nucleic acid metabolic process	0.000023183	0.010293
		GO:0034645	cellular macromolecule biosynthetic process	0.000083603	0.012373
		GO:0009059	macromolecule biosynthetic process	0.000083603	0.012373
		GO:0006259	DNA metabolic process	0.00021997	0.024416
		GO:0006260	DNA replication	0.00028476	0.025287
		GO:0003676	nucleic acid binding	0.00000017311	0.000035141
		GO:0034061	DNA polymerase activity	0.00045464	0.046146
	B2-VS-B3	GO:0042221	response to chemical stimulus	0.000088597	0.028883
		GO:0048523	negative regulation of cellular process	0.00031081	0.03796
		GO:0010074	maintenance of meristem identity	0.00048116	0.03796
		GO:0010033	response to organic substance	0.00085071	0.03796
		GO:0045596	negative regulation of cell differentiation	0.00095427	0.03796
		GO:0048863	stem cell differentiation	0.00095427	0.03796
		GO:0048864	stem cell development	0.00095427	0.03796
		GO:0019827	stem cell maintenance	0.00095427	0.03796
		GO:0048468	cell development	0.001048	0.03796
	B1-VS-B3	GO:0008643	carbohydrate transport	0.000000000023377	0.000000011315
		GO:0006259	DNA metabolic process	0.0000000011674	0.00000028251
		GO:0090304	nucleic acid metabolic process	0.000000002167	0.00000034961
		GO:0006139	nucleobase, nucleoside, nucleotide and nucleic acid metabolic process	0.00000091324	0.0001105
		GO:0044260	cellular macromolecule metabolic process	0.0000056357	0.00054554
		GO:0034641	cellular nitrogen compound metabolic process	0.000030119	0.0024296
		GO:0006807	nitrogen compound metabolic process	0.000073086	0.0050534
		GO:0007389	pattern specification process	0.00023445	0.014184
		GO:0003002	regionalization	0.00059379	0.031933
		GO:0009888	tissue development	0.00076035	0.036801
		GO:0006260	DNA replication	0.00089554	0.039404
		GO:0003676	nucleic acid binding	0.000000000014367	0.0000000030744
		GO:0005402	cation:sugar symporter activity	0.000000000085027	0.0000000090979
		GO:0015293	symporter activity	0.00000000023793	0.000000012729
		GO:0015294	solute:cation symporter activity	0.00000000023793	0.000000012729
		GO:0015291	secondary active transmembrane transporter activity	0.000000038977	0.0000016682
		GO:0022804	active transmembrane transporter activity	0.0000022498	0.000080244
		GO:0008324	cation transmembrane transporter activity	0.000010311	0.00031523
		GO:0022857	transmembrane transporter activity	0.00016642	0.0044518
		GO:0015075	ion transmembrane transporter activity	0.000193	0.0045892
		GO:0005215	transporter activity	0.00036853	0.0078864
		GO:0034061	DNA polymerase activity	0.00076562	0.014556
		GO:0005488	binding	0.00081624	0.014556
		GO:0022891	substrate-specific transmembrane transporter activity	0.0011853	0.019512
		GO:0004175	endopeptidase activity	0.0027286	0.041708
	A1-VS-B1	GO:0034645	cellular macromolecule biosynthetic process	0.00022326	0.038924
		GO:0009059	macromolecule biosynthetic process	0.00022326	0.038924
		GO:0006260	DNA replication	0.00027737	0.038924
		GO:0004175	endopeptidase activity	0.00012768	0.025664
		GO:0034061	DNA polymerase activity	0.00032023	0.032183
	A2-VS-B2	GO:0009808l	ignin metabolic process	0.00000000094561	0.0000002799
		GO:0009698	phenylpropanoid metabolic process	0.0000026425	0.0003911
		GO:0019748	secondary metabolic process	0.00024983	0.02465
		GO:0016682	oxidoreductase activity, acting on diphenols and related substances as donors, oxygen as acceptor	0.0000000059296	0.00000077085
		GO:0016679	oxidoreductase activity, acting on diphenols and related substances as donors	0.000000017075	0.0000011099
		GO:0016491	oxidoreductase activity	0.00019142	0.0082951
	A3-VS-B3	GO:0006260	DNA replication	0.000000091356	0.000016627
		GO:0034645	cellular macromolecule biosynthetic process	0.0000014419	0.000087474
		GO:0009059	macromolecule biosynthetic process	0.0000014419	0.000087474
		GO:0044249	cellular biosynthetic process	0.000075718	0.0034451
		GO:0009058	biosynthetic process	0.000098661	0.0035913
		GO:0006259	DNA metabolic process	0.00013741	0.004168
		GO:0042546	cell wall biogenesis	0.00018714	0.0042573
		GO:0070882	cellular cell wall organization or biogenesis	0.00018714	0.0042573
		GO:0044237	cellular metabolic process	0.00039449	0.0075622
		GO:0044260	cellular macromolecule metabolic process	0.00041551	0.0075622
		GO:0009250	glucan biosynthetic process	0.0004668	0.0077234
		GO:0006073	cellular glucan metabolic process	0.00089619	0.013592
		GO:0019538	protein metabolic process	0.0012211	0.016863
		GO:0000271	polysaccharide biosynthetic process	0.0013898	0.016863
		GO:0033692	cellular polysaccharide biosynthetic process	0.0013898	0.016863
		GO:0044264	cellular polysaccharide metabolic process	0.0016831	0.01744
		GO:0034637	cellular carbohydrate biosynthetic process	0.0017249	0.01744
		GO:0016051	carbohydrate biosynthetic process	0.0017249	0.01744
		GO:0071554	cell wall organization or biogenesis	0.0021066	0.020169
		GO:0044042	glucan metabolic process	0.0022163	0.020169
		GO:0009987	cellular process	0.002634	0.022828
		GO:0009856	pollination	0.0041218	0.034098
		GO:0045229	external encapsulating structure organization	0.0043482	0.034408
		GO:0034061	DNA polymerase activity	0.000000038213	0.0000029042
		GO:0004175	endopeptidase activity	0.00000011797	0.0000044827
		GO:0016779	nucleotidyltransferase activity	0.0000010667	0.000027024
		GO:0070011	peptidase activity, acting on L-amino acid peptides	0.0000045528	0.000086503
		GO:0008233	peptidase activity	0.0000086643	0.0001317
		GO:0016772	transferase activity, transferring phosphorus-containing groups	0.000032982	0.00041777
		GO:0016740	transferase activity	0.000059375	0.00064465
		GO:0016759	cellulose synthase activity	0.00016387	0.0015567
		GO:0046527	glucosyltransferase activity	0.00045942	0.0038795
		GO:0003676	nucleic acid binding	0.0012059	0.0091645
