# Supplementary material for: Genetic Subtraction Profiling Identifies Candidate miRNAs Involved in Rice Female Gametophyte Abortion
Source: G3 (Bethesda). 2017 May 19;7(7):2281–93. doi: 10.1534/g3.117.040808 (PMC5499135; doi:10.1534/g3.117.040808)
Supplement: Supplementary file 9 [file 2281TableS7.xlsx]

## Sheet: Sheet1
	Table S7 The transcription factor target genes of differentially expressed known miRNAs in all comparisons.
	TF family	A1-vs-A2		A2-vs-A3		A1-vs-A3		B1-vs-B2		B2-vs-B3		B1-vs-B3		A1-vs-B1		A2-vs-B2		A3-vs-B3
		miRNA	Target	miRNA	Target	miRNA	Target	miRNA	Target	miRNA	Target	miRNA	Target	miRNA	Target	miRNA	Target	miRNA	Target
	AP2	osa-miR172a/osa-miR172d-3p	LOC_Os05g03040	osa-miR172a/osa-miR172d-3p	LOC_Os03g60430	osa-miR172a/osa-miR172d-3p	LOC_Os05g03040	osa-miR172a/osa-miR172d-3p	LOC_Os05g03040	osa-miR172a/osa-miR172d-3p	LOC_Os03g60430	osa-miR172a/osa-miR172d-3p	LOC_Os03g60430	osa-miR172a/osa-miR172d-3p	LOC_Os03g60430
				osa-miR172a/osa-miR172d-3p	LOC_Os05g03040	osa-miR396e-5p/osa-miR396f-5p	LOC_Os11g03540			osa-miR172a/osa-miR172d-3p	LOC_Os04g55560	osa-miR172a/osa-miR172d-3p	LOC_Os05g03040	osa-miR172a/osa-miR172d-3p	LOC_Os05g03040
										osa-miR172a/osa-miR172d-3p	LOC_Os05g03040
	ARF	osa-miR160a-5p/osa-miR160b-5p/osa-miR160c-5p/osa-miR160d-5p/osa-miR160e-5p	LOC_Os02g41800	osa-miR160a-5p/osa-miR160b-5p/osa-miR160c-5p/osa-miR160d-5p/osa-miR160e-5p	LOC_Os02g41800	osa-miR160a-5p/osa-miR160b-5p/osa-miR160c-5p/osa-miR160d-5p/osa-miR160e-5p	LOC_Os04g43910	osa-miR160a-5p/osa-miR160b-5p/osa-miR160c-5p/osa-miR160d-5p	LOC_Os02g41800	osa-miR160a-5p/osa-miR160b-5p/osa-miR160c-5p/osa-miR160d-5p/osa-miR160e-5p	LOC_Os02g41800	osa-miR160a-5p/osa-miR160b-5p/osa-miR160c-5p/osa-miR160d-5p/osa-miR160e-5p	LOC_Os02g41800			osa-miR160a-5p/osa-miR160b-5p/osa-miR160c-5p/osa-miR160d-5p/osa-miR160e-5p	LOC_Os04g43910	osa-miR396a-5p/osa-miR396b-5p	LOC_Os01g70270
		osa-miR160a-5p/osa-miR160b-5p/osa-miR160c-5p/osa-miR160d-5p/osa-miR160e-5p	LOC_Os04g43910	osa-miR160a-5p/osa-miR160b-5p/osa-miR160c-5p/osa-miR160d-5p/osa-miR160e-5p	LOC_Os04g43910	osa-miR160a-5p/osa-miR160b-5p/osa-miR160c-5p/osa-miR160d-5p/osa-miR160e-5p	LOC_Os06g47150	osa-miR160a-5p/osa-miR160b-5p/osa-miR160c-5p/osa-miR160d-5p	LOC_Os04g43910	osa-miR160a-5p/osa-miR160b-5p/osa-miR160c-5p/osa-miR160d-5p/osa-miR160e-5p	LOC_Os04g43910	osa-miR160a-5p/osa-miR160b-5p/osa-miR160c-5p/osa-miR160d-5p/osa-miR160e-5p	LOC_Os04g43910			osa-miR160a-5p/osa-miR160b-5p/osa-miR160c-5p/osa-miR160d-5p/osa-miR160e-5p	LOC_Os04g59430
		osa-miR160a-5p/osa-miR160b-5p/osa-miR160c-5p/osa-miR160d-5p/osa-miR160e-5p	LOC_Os06g47150	osa-miR160a-5p/osa-miR160b-5p/osa-miR160c-5p/osa-miR160d-5p/osa-miR160e-5p	LOC_Os04g59430	osa-miR160a-5p/osa-miR160b-5p/osa-miR160c-5p/osa-miR160d-5p/osa-miR160e-5p	LOC_Os10g33940	osa-miR160a-5p/osa-miR160b-5p/osa-miR160c-5p/osa-miR160d-5p	LOC_Os06g47150	osa-miR160a-5p/osa-miR160b-5p/osa-miR160c-5p/osa-miR160d-5p/osa-miR160e-5p	LOC_Os04g59430	osa-miR160a-5p/osa-miR160b-5p/osa-miR160c-5p/osa-miR160d-5p/osa-miR160e-5p	LOC_Os06g47150			osa-miR160a-5p/osa-miR160b-5p/osa-miR160c-5p/osa-miR160d-5p/osa-miR160e-5p	LOC_Os06g47150
		osa-miR160a-5p/osa-miR160b-5p/osa-miR160c-5p/osa-miR160d-5p/osa-miR160e-5p	LOC_Os10g33940	osa-miR160a-5p/osa-miR160b-5p/osa-miR160c-5p/osa-miR160d-5p/osa-miR160e-5p	LOC_Os10g33940			osa-miR160a-5p/osa-miR160b-5p/osa-miR160c-5p/osa-miR160d-5p	LOC_Os10g33940	osa-miR160a-5p/osa-miR160b-5p/osa-miR160c-5p/osa-miR160d-5p/osa-miR160e-5p	LOC_Os06g47150					osa-miR160a-5p/osa-miR160b-5p/osa-miR160c-5p/osa-miR160d-5p/osa-miR160e-5p	LOC_Os10g33940
	bHLH	osa-miR531b	LOC_Os04g53990	osa-miR531b	LOC_Os04g53990	osa-miR394	LOC_Os08g41320					osa-miR812a/osa-miR812b/osa-miR812c/osa-miR812d/osa-miR812e	LOC_Os02g23823	osa-miR1846e	LOC_Os02g52190	osa-miR531b	LOC_Os04g53990	osa-miR1846e	LOC_Os02g52190
		osa-miR172a /osa-miR172d-3p	LOC_Os08g39630													osa-miR394	LOC_Os08g41320	osa-miR394	LOC_Os08g41320
		osa-miR394	LOC_Os08g41320
		osa-miR1436	LOC_Os10g40740
	bZIP	osa-miR172a/osa-miR172d-3p	LOC_Os05g41070			osa-miR172a/osa-miR172d-3p	LOC_Os05g41070	osa-miR1850.1	LOC_Os05g37170			osa-miR1850.1	LOC_Os05g37170	osa-miR172a/osa-miR172d-3p	LOC_Os05g41070
						osa-miR5794	LOC_Os07g08420	osa-miR172a/osa-miR172d-3p	LOC_Os05g41070			osa-miR172a/osa-miR172d-3p	LOC_Os05g41070
	C2H2	osa-miR2055	LOC_Os01g65080			osa-miR2055	LOC_Os01g65080					osa-miR166g-3p/osa-miR166h-3p	LOC_Os07g39310
						osa-miR166g-3p/osa-miR166h-3p	LOC_Os07g39310
	C3H			osa-miR531b	LOC_Os06g32720											osa-miR531b	LOC_Os06g32720
	CO-like									osa-miR408-3p	LOC_Os02g08150			osa-miR3980a-3p/osa-miR3980b-3p	LOC_Os02g49880
	DBB					osa-miR5519	LOC_Os06g05890	osa-miR5519	LOC_Os06g05890	osa-miR5519	LOC_Os06g05890	osa-miR5519	LOC_Os06g05890	osa-miR5519	LOC_Os06g05890
	ERF	osa-miR1427	LOC_Os03g60120							osa-miR160d-3p	LOC_Os04g46220			osa-miR166k-5p	LOC_Os09g13940	osa-miR166k-5p	LOC_Os09g13940
										osa-miR166k-5p	LOC_Os09g13940
	FAR1	osa-miR156a/osa-miR156b-5p/osa-miR156c-5p/osa-miR156d/osa-miR156e/osa-miR156f-5p/osa-miR156g-5p/osa-miR156h-5p/osa-miR156i/osa-miR156j-5p	LOC_Os07g42400	osa-miR531b	LOC_Os12g12380			osa-miR5491	LOC_Os06g07010	osa-miR394	LOC_Os12g24400	osa-miR5491	LOC_Os06g07010	osa-miR5491	LOC_Os06g07010
		osa-miR531b	LOC_Os12g12380									osa-miR394	LOC_Os12g24400
	G2-like	osa-miR164a/osa-miR164b/osa-miR164f	LOC_Os01g62660	osa-miR164c	LOC_Os01g62660	osa-miR164a/osa-miR164b/osa-miR164c/osa-miR164f/osa-miR5161	LOC_Os01g62660	osa-miR164a/osa-miR164b/osa-miR164c/osa-miR164f	LOC_Os01g62660			osa-miR164a/osa-miR164b/osa-miR164c/osa-miR164f	LOC_Os01g62660	osa-miR164a/osa-miR164b/osa-miR164f	LOC_Os01g62660	osa-miR531b	LOC_Os02g22020
		osa-miR5161	LOC_Os01g62660					osa-miR5074	LOC_Os05g34110			osa-miR5161	LOC_Os01g62660	osa-miR1850.2	LOC_Os03g55590
	GATA	osa-miR531b	LOC_Os11g08410	osa-miR5144-3p	LOC_Os02g12790	osa-miR5144-3p	LOC_Os02g12790	osa-miR5496	LOC_Os06g37450							osa-miR531b	LOC_Os10g32070
				osa-miR531b	LOC_Os10g32070											osa-miR531b	LOC_Os11g08410
				osa-miR531b	LOC_Os11g08410
	GeBP	osa-miR6253	LOC_Os03g50110			osa-miR6253	LOC_Os03g50110
	GRAS			osa-miR5793	LOC_Os01g62460	osa-miR171c-5p/osa-miR171i-3p	LOC_Os02g44360	osa-miR171i-3p	LOC_Os02g44360	osa-miR5793	LOC_Os01g62460	osa-miR171c-5p/osa-miR171i-3p/osa-miR171i-5p	LOC_Os02g44360	osa-miR171c-5p	LOC_Os06g01620
				osa-miR171i-3p	LOC_Os02g44360	osa-miR171c-5p/osa-miR171i-3p	LOC_Os04g46860	osa-miR171i-3p	LOC_Os04g46860	osa-miR529a	LOC_Os04g46350	osa-miR171c-5p/osa-miR171i-3p/osa-miR171i-5p	LOC_Os02g44370	osa-miR3980a-3p/osa-miR3980b-3p	LOC_Os10g40390
				osa-miR171i-3p	LOC_Os04g46860	osa-miR171c-5p/osa-miR171i-3p	LOC_Os06g01620					osa-miR171c-5p/osa-miR171i-3p/osa-miR171i-5p	LOC_Os04g46860
				osa-miR171i-3p	LOC_Os10g40390	osa-miR171c-5p/osa-miR171i-3p	LOC_Os10g40390					osa-miR171c-5p/osa-miR171i-3p/osa-miR171i-5p	LOC_Os10g40390
	GRF	osa-miR396a-5p/osa-miR396b-5p/osa-miR396c-5p/osa-miR396e-5p/osa-miR396f-5p	LOC_Os02g53690			osa-miR396c-5p/osa-miR396e-5p/osa-miR396f-5p	LOC_Os02g45570	osa-miR396a-5p/osa-miR396b-5p/osa-miR396c-5p/osa-miR396e-5p/osa-miR396f-5p	LOC_Os03g47140			osa-miR396a-5p/osa-miR396b-5p/osa-miR396c-5p/osa-miR396e-5p/osa-miR396f-5p	LOC_Os02g45570
		osa-miR396a-5p/osa-miR396b-5p/osa-miR396c-5p/osa-miR396e-5p/osa-miR396f-5p	LOC_Os03g47140			osa-miR396c-5p/osa-miR396e-5p	LOC_Os03g51970	osa-miR396a-5p/osa-miR396b-5p/osa-miR396c-5p/osa-miR396e-5p	LOC_Os03g51970			osa-miR396a-5p/osa-miR396b-5p/osa-miR396c-5p/osa-miR396e-5p	LOC_Os03g51970
		osa-miR396a-5p/osa-miR396b-5p/osa-miR396c-5p/osa-miR396e-5p/osa-miR396f-5p	LOC_Os06g02560			osa-miR396c-5p/osa-miR396e-5p/osa-miR396f-5p	LOC_Os06g02560	osa-miR396a-5p/osa-miR396b-5p/osa-miR396c-5p/osa-miR396e-5p/osa-miR396f-5p	LOC_Os06g02560			osa-miR396a-5p/osa-miR396b-5p/osa-miR396c-5p/osa-miR396e-5p/osa-miR396f-5p	LOC_Os06g02560
		osa-miR396a-5p/osa-miR396b-5p/osa-miR396c-5p/osa-miR396e-5p/osa-miR396f-5p	LOC_Os06g10310			osa-miR396c-5p/osa-miR396e-5p/osa-miR396f-5p	LOC_Os06g10310	osa-miR396a-5p/osa-miR396b-5p/osa-miR396c-5p/osa-miR396e-5p/osa-miR396f-5p	LOC_Os06g10310
		osa-miR396a-5p/osa-miR396b-5p/osa-miR396c-5p/osa-miR396e-5p	LOC_Os11g35030
		osa-miR396a-5p/osa-miR396b-5p/osa-miR396c-5p/osa-miR396e-5p	LOC_Os12g29980
	HD-ZIP							osa-miR166k-5p	LOC_Os10g23090					osa-miR166k-5p	LOC_Os10g23090	osa-miR531b	LOC_Os03g10210
	HSF									osa-miR5506	LOC_Os05g45410
	LBD	osa-miR1846a-3p	LOC_Os01g66590							osa-miR529a	LOC_Os01g60960	osa-miR529a	LOC_Os01g60960
	MIKC	osa-miR444b.1/osa-miR444c.1/osa-miR444d.3/osa-miR444f	LOC_Os02g49840			osa-miR444b.1/osa-miR444c.1	LOC_Os02g36924	osa-miR5179	LOC_Os06g49840			osa-miR5179	LOC_Os06g49840	osa-miR444d.3	LOC_Os02g49840	osa-miR444f	LOC_Os02g49840
						osa-miR444b.1/osa-miR444c.1	LOC_Os02g49840
	M-type	osa-miR444b.1/osa-miR444c.1/osa-miR444d.3/osa-miR444f	LOC_Os02g49840			osa-miR444b.1/osa-miR444c.1	LOC_Os02g49840							osa-miR5521	LOC_Os01g68560	osa-miR444f	LOC_Os02g49840
														osa-miR444d.3	LOC_Os02g49840
	MYB	osa-miR159a.1/osa-miR159b/osa-miR159f/osa-miR319b	LOC_Os01g59660	osa-miR159a.1/osa-miR159b	LOC_Os01g59660	osa-miR164a/osa-miR164b/osa-miR164f	LOC_Os01g03720	osa-miR164a/osa-miR164b/osa-miR164f	LOC_Os01g03720	osa-miR164a/osa-miR164b/osa-miR164f	LOC_Os01g03720	osa-miR164a/osa-miR164b/osa-miR164f	LOC_Os01g03720	osa-miR5793	LOC_Os01g63460
		osa-miR159a.1/osa-miR159b/osa-miR159f	LOC_Os03g38210	osa-miR159a.1/osa-miR159b	LOC_Os04g46384	osa-miR159f	LOC_Os03g38210	osa-miR159a.1/osa-miR159b/osa-miR159f/osa-miR319b	LOC_Os01g59660	osa-miR319b	LOC_Os01g59660	osa-miR159f/osa-miR319b	LOC_Os01g59660
		osa-miR159a.1/osa-miR159b/osa-miR159f	LOC_Os06g40330	osa-miR159a.1/osa-miR159b	LOC_Os06g40330			osa-miR5793	LOC_Os01g63460	osa-miR5793	LOC_Os01g63460	osa-miR5793	LOC_Os01g63460
								osa-miR159a.1/osa-miR159b/osa-miR159f	LOC_Os03g38210			osa-miR159f	LOC_Os03g38210
								osa-miR159a.1/osa-miR159b/osa-miR159f	LOC_Os06g40330			osa-miR159f	LOC_Os06g40330
	MYB-related					osa-miR166g-3p/osa-miR166h-3p	LOC_Os04g58020					osa-miR166g-3p/osa-miR166h-3p	LOC_Os04g58020
	NAC	osa-miR164a/osa-miR164b/osa-miR164f	LOC_Os06g46270	osa-miR531b	LOC_Os10g27360	osa-miR164a/osa-miR164b/osa-miR164c/osa-miR164f	LOC_Os06g46270	osa-miR160e-3p	LOC_Os01g66120	osa-miR164a/osa-miR164b/osa-miR164c/osa-miR164f	LOC_Os02g36880	osa-miR164a/osa-miR164b/osa-miR164c/osa-miR164f	LOC_Os02g36880	osa-miR3980a-3p/osa-miR3980b-3p	LOC_Os04g36800	osa-miR531b	LOC_Os10g27360
		osa-miR164a/osa-miR164b/osa-miR164f	LOC_Os08g10080			osa-miR164a/osa-miR164b/osa-miR164c/osa-miR164f	LOC_Os08g10080	osa-miR5074	LOC_Os06g01230			osa-miR164a/osa-miR164b/osa-miR164c/osa-miR164f	LOC_Os06g46270	osa-miR164a/osa-miR164b/osa-miR164f	LOC_Os04g38720	osa-miR160a-3p/osa-miR160b-3p	LOC_Os12g29330
		osa-miR531b	LOC_Os10g27360			osa-miR160a-3p/osa-miR160b-3p	LOC_Os12g29330	osa-miR5074	LOC_Os06g23650			osa-miR164a/osa-miR164b/osa-miR164c/osa-miR164f	LOC_Os08g10080	osa-miR164a/osa-miR164b/osa-miR164f	LOC_Os06g23650
		osa-miR164a/osa-miR164b/osa-miR164f	LOC_Os12g41680					osa-miR164a/osa-miR164b/osa-miR164c/osa-miR164d/osa-miR164f	LOC_Os06g46270			osa-miR164a/osa-miR164b/osa-miR164c/osa-miR164f	LOC_Os12g41680	osa-miR164a/osa-miR164b/osa-miR164f	LOC_Os06g46270
								osa-miR164a/osa-miR164b/osa-miR164c/osa-miR164d/osa-miR164f	LOC_Os08g10080					osa-miR5074	LOC_Os10g42130
								osa-miR5074	LOC_Os10g42130					osa-miR164a/osa-miR164b/osa-miR164f	LOC_Os12g41680
								osa-miR164a/osa-miR164b/osa-miR164c/osa-miR164d/osa-miR164f	LOC_Os12g41680
	NF-YA			osa-miR169b/osa-miR169c	LOC_Os02g53620			osa-miR169a	LOC_Os02g53620
				osa-miR169b/osa-miR169c	LOC_Os03g07880			osa-miR169a	LOC_Os03g07880
				osa-miR169b/osa-miR169c	LOC_Os03g29760			osa-miR169a	LOC_Os07g06470
				osa-miR169b/osa-miR169c	LOC_Os07g06470			osa-miR169a	LOC_Os07g41720
				osa-miR169b/osa-miR169c	LOC_Os07g41720
				osa-miR169b/osa-miR169c	LOC_Os12g42400
	SBP	osa-miR156a/osa-miR156b-5p/osa-miR156c-5p/osa-miR156d/osa-miR156e/osa-miR156f-5p/osa-miR156g-5p/osa-miR156h-5p/osa-miR156i/osa-miR156j-5p/osa-miR156l-5p	LOC_Os02g04680					osa-miR156l-5p	LOC_Os02g04680			osa-miR156l-5p	LOC_Os04g46580	osa-miR156l-5p	LOC_Os01g69830
		osa-miR156a/osa-miR156b-5p/osa-miR156c-5p/osa-miR156d/osa-miR156e/osa-miR156f-5p/osa-miR156g-5p/osa-miR156h-5p/osa-miR156i/osa-miR156j-5p/osa-miR156l-5p	LOC_Os02g07780					osa-miR156l-5p	LOC_Os04g46580			osa-miR156l-5p	LOC_Os08g39890	osa-miR156l-5p	LOC_Os02g04680
		osa-miR156a/osa-miR156b-5p/osa-miR156c-5p/osa-miR156d/osa-miR156e/osa-miR156f-5p/osa-miR156g-5p/osa-miR156h-5p/osa-miR156i/osa-miR156j-5p/osa-miR156l-5p	LOC_Os06g45310					osa-miR156l-5p	LOC_Os09g32944					osa-miR156l-5p	LOC_Os06g45310
		osa-miR156a/osa-miR156b-5p/osa-miR156c-5p/osa-miR156d/osa-miR156e/osa-miR156f-5p/osa-miR156g-5p/osa-miR156h-5p/osa-miR156i/osa-miR156j-5p/osa-miR156l-5p	LOC_Os09g32944											osa-miR156l-5p	LOC_Os06g49010
		osa-miR156a/osa-miR156b-5p/osa-miR156c-5p/osa-miR156d/osa-miR156e/osa-miR156f-5p/osa-miR156g-5p/osa-miR156h-5p/osa-miR156i/osa-miR156j-5p/osa-miR156l-5p	LOC_Os11g30370											osa-miR156l-5p	LOC_Os07g32170
														osa-miR156l-5p	LOC_Os11g30370
	TALE	osa-miR168a-5p	LOC_Os03g03260	osa-miR531b	LOC_Os06g36680
	TCP	osa-miR319b	LOC_Os03g57190			osa-miR319b	LOC_Os03g57190			osa-miR319b	LOC_Os03g57190	osa-miR319b	LOC_Os03g57190
										osa-miR319b	LOC_Os07g05720
										osa-miR319b	LOC_Os12g42190
	Trihelix	osa-miR164a/osa-miR164b/osa-miR164f	LOC_Os02g43300			osa-miR159a.2	LOC_Os10g37240	osa-miR159a.2	LOC_Os10g37240	osa-miR528-5p	LOC_Os02g33770	osa-miR159a.2	LOC_Os10g37240	osa-miR3980a-3p/osa-miR3980b-3p	LOC_Os01g48320	osa-miR528-5p	LOC_Os02g33770
		osa-miR159a.2	LOC_Os10g37240			osa-miR159a.2	LOC_Os03g02240			osa-miR159a.2	LOC_Os03g02240
										osa-miR159a.2	LOC_Os10g37240
	WRKY			osa-miR531b	LOC_Os05g49210					osa-miR529a	LOC_Os01g40260					osa-miR531b	LOC_Os05g49210
	ZF-HD	osa-miR5161	LOC_Os11g13930
