# Supplementary material for: Genetic Subtraction Profiling Identifies Candidate miRNAs Involved in Rice Female Gametophyte Abortion
Source: G3 (Bethesda). 2017 May 19;7(7):2281–93. doi: 10.1534/g3.117.040808 (PMC5499135; doi:10.1534/g3.117.040808)
Supplement: Supplementary file 10 [file 2281TableS8.xlsx]

## Sheet: Sheet1
	Table S8 The specific data of venn diagram
	363 miRNAs included exclusively in "Ovule":	12 common miRNAs in "Ovule" and "Root":	28 common miRNAs in "Ovule", "Root" and "Leaf":	7 common miRNAs in "Ovule" and "Leaf":	10 common miRNAs in "Ovule" and "Pollen":	12 common miRNAs in "Ovule", "Pollen" and "Root":	86 common miRNAs in "Ovule", "Pollen", "Root" and "Leaf":	4 common miRNAs in "Ovule", "Pollen" and "Leaf":	7 miRNAs included exclusively in "Pollen":	3 common miRNAs in "Pollen" and "Root":	66 common miRNAs in "Pollen", "Root" and "Leaf":	13 common miRNAs in "Pollen" and "Leaf":	7 common miRNAs in "Root" and "Leaf":	11 miRNAs included exclusively in "Leaf":	25 miRNAs included exclusively in "Root":
	osa-miR156f-5p	osa-miR319b	osa-miR394	osa-miR1849	osa-miR820a	osa-miR820c	osa-miR156d	osa-miR159b	osa-miR1846a	osa-miR1319	osa-miR1318	osa-miR160f	osa-miR166i	osa-miR169f	osa-miR159b
	osa-miR156h-5p	osa-miR529a	osa-miR1864	osa-miR1431	osa-miR820b	osa-miR164c	osa-miR156a	osa-miR1429-5p	osa-miR1858a	osa-miR160e	osa-miR1320	osa-miR1863	osa-miR166j	osa-miR1848	osa-miR169hj
	osa-miR156j-5p	osa-miR1847.1	osa-miR814b	osa-miR399j	osa-miR1846b-5p	osa-miR1860-5p	osa-miR156e	osa-miR1429-3p	osa-miR1858b	osa-miR1850.3	osa-miR1425	osa-miR1867	osa-miR167a*	osa-miR1873	osa-miR171h
	osa-miR156b-5p	osa-miR1857-5p	osa-miR814a	osa-miR169j	osa-miR1846c-5p	osa-miR1852	osa-miR156i	osa-miR418	osa-miR1884a		osa-miR1432	osa-miR2106	osa-miR169i	osa-miR2103	osa-miR1861n
	osa-miR156c-5p	osa-miR395c	osa-miR395j	osa-miR399d	osa-miR1874-5p	osa-miR444f	osa-miR167b		osa-miR2094-3p		osa-miR156b	osa-miR819c	osa-miR1884b	osa-miR2873	osa-miR319a
	osa-miR156g-5p	osa-miR1861e	osa-miR169h	osa-miR169g	osa-miR1871	osa-miR169n	osa-miR166f		osa-miR399h		osa-miR156c	osa-miR819d	osa-miR393	osa-miR395a	osa-miR441a
	osa-miR167a-5p	osa-miR1861k	osa-miR169k	osa-miR419	osa-miR1866-5p	osa-miR169o	osa-miR167g		osa-miR531		osa-miR156g	osa-miR819e	osa-miR408	osa-miR399e	osa-miR441c
	osa-miR167c-5p	osa-miR1861m	osa-miR169l		osa-miR1853-3p	osa-miR810a	osa-miR167f				osa-miR156f	osa-miR819f		osa-miR399f	osa-miR441b
	osa-miR166d-3p	osa-miR1439	osa-miR169m		osa-miR1854-3p	osa-miR1861i	osa-miR167j				osa-miR156h	osa-miR819g		osa-miR399g	osa-miR446
	osa-miR166a-3p	osa-miR1861d	osa-miR395d		osa-miR1855	osa-miR1861l	osa-miR444c.2				osa-miR156j	osa-miR819h		osa-miR808	osa-miR809a
	osa-miR166b-3p	osa-miR1861h	osa-miR395r			osa-miR1861b	osa-miR159a.1				osa-miR156l	osa-miR819i		osa-miR813	osa-miR809b
	osa-miR166j-3p	osa-miR1861j	osa-miR395h			osa-miR1861f	osa-miR166m				osa-miR160a	osa-miR819j			osa-miR809c
	osa-miR166c-3p		osa-miR395k				osa-miR156k				osa-miR160b	osa-miR819k			osa-miR809d
	osa-miR166g-3p		osa-miR395n				osa-miR444e				osa-miR160c				osa-miR809g
	osa-miR166h-3p		osa-miR395b				osa-miR159a.2				osa-miR160d				osa-miR811a
	osa-miR168a-5p		osa-miR1883a				osa-miR444d.2				osa-miR166a				osa-miR811b
	osa-miR167d-5p		osa-miR1883b				osa-miR1850.1				osa-miR166b				osa-miR821d
	osa-miR167h-5p		osa-miR395e				osa-miR815b				osa-miR166c				osa-miR822e
	osa-miR166l-3p		osa-miR395g				osa-miR171b				osa-miR166d				osa-miR823f
	osa-miR166k-3p		osa-miR395i				osa-miR818d				osa-miR166e				osa-miR824g
	osa-miR535-5p		osa-miR395l				osa-miR815c				osa-miR166g				osa-miR825h
	osa-miR5794		osa-miR395m				osa-miR172b				osa-miR166h				osa-miR826i
	osa-miR167e-5p		osa-miR395p				osa-miR2055				osa-miR166k				osa-miR827j
	osa-miR167i-5p		osa-miR395q				osa-miR815a				osa-miR166l				osa-miR828k
	osa-miR5497		osa-miR395s				osa-miR812e				osa-miR166n
	osa-miR5144-5p		osa-miR159c				osa-miR812c				osa-miR167a
	osa-miR444b.2		osa-miR159d				osa-miR164a				osa-miR167c
	osa-miR528-5p		osa-miR159e				osa-miR164b				osa-miR167d
	osa-miR390-5p						osa-miR164f				osa-miR167e
	osa-miR5825						osa-miR439a				osa-miR167h
	osa-miR1425-3p						osa-miR439c				osa-miR167i
	osa-miR5487						osa-miR439e				osa-miR168a
	osa-miR444a-3p.2						osa-miR439f				osa-miR171c
	osa-miR5806						osa-miR439h				osa-miR171d
	osa-miR167a-3p						osa-miR444c.1				osa-miR171e
	osa-miR1425-5p						osa-miR1862d				osa-miR171f
	osa-miR444a-5p						osa-miR1846e				osa-miR171i
	osa-miR171c-3p						osa-miR162b				osa-miR172d
	osa-miR171f-3p						osa-miR1862e				osa-miR1856
	osa-miR171d-3p						osa-miR812a				osa-miR1870
	osa-miR171e-3p						osa-miR169c				osa-miR2090
	osa-miR160e-5p						osa-miR169b				osa-miR390
	osa-miR3980a-5p						osa-miR1860-3p				osa-miR393b
	osa-miR3980b-5p						osa-miR172a				osa-miR396a
	osa-miR5793						osa-miR439g				osa-miR396b
	osa-miR2101-3p						osa-miR439d				osa-miR396c
	osa-miR5486						osa-miR812b				osa-miR396e
	osa-miR5536						osa-miR1872				osa-miR396f
	osa-miR5148c						osa-miR169a				osa-miR442
	osa-miR5148b						osa-miR162a				osa-miR444a
	osa-miR5148a						osa-miR1862a				osa-miR444b
	osa-miR160d-5p						osa-miR1875				osa-miR528
	osa-miR160a-5p						osa-miR1862b				osa-miR535
	osa-miR160b-5p						osa-miR1862c				osa-miR806a
	osa-miR160c-5p						osa-miR1868				osa-miR806b
	osa-miR1870-5p						osa-miR1427				osa-miR806c
	osa-miR171i-3p						osa-miR812h				osa-miR806d
	osa-miR171c-5p						osa-miR812i				osa-miR806g
	osa-miR396e-5p						osa-miR818b				osa-miR806h
	osa-miR396f-5p						osa-miR444d.3				osa-miR806e
	osa-miR5179						osa-miR812j				osa-miR806f
	osa-miR531a						osa-miR818e				osa-miR810b.2
	osa-miR531b						osa-miR812d				osa-miR819a
	osa-miR531c						osa-miR1874-3p				osa-miR819b
	osa-miR5153						osa-miR812g				osa-miR827a
	osa-miR2095-5p						osa-miR159f				osa-miR827b
	osa-miR5801						osa-miR1436
	osa-miR5802						osa-miR818c
	osa-miR1432-5p						osa-miR1850.2
	osa-miR2121a						osa-miR1881
	osa-miR812k						osa-miR818a
	osa-miR812m						osa-miR397a
	osa-miR2121b						osa-miR810b.1
	osa-miR171e-5p						osa-miR812f
	osa-miR812l						osa-miR435
	osa-miR444b.1						osa-miR164d
	osa-miR166i-3p						osa-miR1857-3p
	osa-miR166d-5p						osa-miR1851
	osa-miR5145						osa-miR169e
	osa-miR5792						osa-miR396d
	osa-miR2867-3p						osa-miR171a
	osa-miR5150-5p						osa-miR164e
	osa-miR5813						osa-miR529b
	osa-miR812v						osa-miR397b
	osa-miR390-3p						osa-miR439i
	osa-miR319a-3p						osa-miR1859
	osa-miR1423-5p
	osa-miR5800
	osa-miR5144-3p
	osa-miR2093-5p
	osa-miR166b-5p
	osa-miR172d-3p
	osa-miR5519
	osa-miR166h-5p
	osa-miR5791
	osa-miR812u
	osa-miR5499
	osa-miR1846a-5p
	osa-miR812n-3p
	osa-miR156l-5p
	osa-miR5146
	osa-miR408-5p
	osa-miR812o-3p
	osa-miR2873b
	osa-miR812p
	osa-miR5083
	osa-miR396c-5p
	osa-miR812t
	osa-miR5491
	osa-miR5513
	osa-miR812s
	osa-miR396a-5p
	osa-miR396b-5p
	osa-miR5161
	osa-miR6254
	osa-miR168a-3p
	osa-miR1846a-3p
	osa-miR5501
	osa-miR5490
	osa-miR396c-3p
	osa-miR2101-5p
	osa-miR2871a-5p
	osa-miR5503
	osa-miR5821
	osa-miR6253
	osa-miR5512a
	osa-miR5512b
	osa-miR1319b
	osa-miR5508
	osa-miR2093-3p
	osa-miR5150-3p
	osa-miR6250
	osa-miR160a-3p
	osa-miR160b-3p
	osa-miR5540
	osa-miR5817
	osa-miR5808
	osa-miR1846d-5p
	osa-miR5498
	osa-miR2871a-3p
	osa-miR2871b
	osa-miR5834
	osa-miR535-3p
	osa-miR5505
	osa-miR5799
	osa-miR160d-3p
	osa-miR5516a
	osa-miR5516b
	osa-miR5818
	osa-miR5816
	osa-miR160e-3p
	osa-miR1440b
	osa-miR166e-3p
	osa-miR5154
	osa-miR5506
	osa-miR5526
	osa-miR5074
	osa-miR5815
	osa-miR6255
	osa-miR5504
	osa-miR5532
	osa-miR5529
	osa-miR5082
	osa-miR5502
	osa-miR440
	osa-miR5151
	osa-miR5492
	osa-miR5076
	osa-miR166k-5p
	osa-miR171d-5p
	osa-miR396a-3p
	osa-miR396b-3p
	osa-miR5518
	osa-miR166a-5p
	osa-miR7692-3p
	osa-miR156j-3p
	osa-miR408-3p
	osa-miR2098-3p
	osa-miR171i-5p
	osa-miR1879
	osa-miR5528
	osa-miR5837.2
	osa-miR5833
	osa-miR5496
	osa-miR2118b
	osa-miR2118n
	osa-miR2863c
	osa-miR1863c
	osa-miR5538
	osa-miR166e-5p
	osa-miR5521
	osa-miR1319a
	osa-miR166l-5p
	osa-miR2865
	osa-miR2864.2
	osa-miR396g
	osa-miR396h
	osa-miR5789
	osa-miR3979-5p
	osa-miR5509
	osa-miR5824
	osa-miR2094-5p
	osa-miR6249a
	osa-miR6249b
	osa-miR5340
	osa-miR1863b.2
	osa-miR3980a-3p
	osa-miR3980b-3p
	osa-miR167e-3p
	osa-miR167i-3p
	osa-miR1846d-3p
	osa-miR2880
	osa-miR2863b
	osa-miR812o-5p
	osa-miR5339
	osa-miR167h-3p
	osa-miR2120
	osa-miR2275d
	osa-miR172d-5p
	osa-miR393b-3p
	osa-miR6247
	osa-miR2095-3p
	osa-miR167c-3p
	osa-miR2118h
	osa-miR2118k
	osa-miR5788
	osa-miR814c
	osa-miR5539a
	osa-miR5539b
	osa-miR5500
	osa-miR156c-3p
	osa-miR156g-3p
	osa-miR396f-3p
	osa-miR5829
	osa-miR5534a
	osa-miR1880
	osa-miR439b
	osa-miR3982-5p
	osa-miR5515
	osa-miR396e-3p
	osa-miR169d
	osa-miR2096-3p
	osa-miR5537
	osa-miR7695-5p
	osa-miR827
	osa-miR5809
	osa-miR169i-5p.1
	osa-miR1863a
	osa-miR6256
	osa-miR160c-3p
	osa-miR2118f
	osa-miR2118j
	osa-miR2118m
	osa-miR2097-5p
	osa-miR5811
	osa-miR2864.1
	osa-miR5493
	osa-miR530-3p
	osa-miR812n-5p
	osa-miR5147
	osa-miR2870
	osa-miR5510
	osa-miR5522
	osa-miR393b-5p
	osa-miR1876
	osa-miR5797
	osa-miR393a
	osa-miR398b
	osa-miR2867-5p
	osa-miR5078
	osa-miR5534b
	osa-miR1846b-3p
	osa-miR1869
	osa-miR2275a
	osa-miR2275b
	osa-miR2878-3p
	osa-miR395y
	osa-miR395v
	osa-miR7693-5p
	osa-miR1320-5p
	osa-miR1426
	osa-miR1440a
	osa-miR1441
	osa-miR169f.1
	osa-miR2118p
	osa-miR2275c
	osa-miR3979-3p
	osa-miR5072
	osa-miR5152-5p
	osa-miR5160
	osa-miR5337a
	osa-miR812r
	osa-miR7694-3p
	osa-miR5143a
	osa-miR5143b
	osa-miR5523
	osa-miR2118e
	osa-miR2118r
	osa-miR530-5p
	osa-miR3981-3p
	osa-miR5805
	osa-miR5079a
	osa-miR5079b
	osa-miR5525
	osa-miR5073
	osa-miR6248
	osa-miR399a
	osa-miR399b
	osa-miR399c
	osa-miR1854-5p
	osa-miR169q
	osa-miR7694-5p
	osa-miR5485
	osa-miR5814
	osa-miR1870-3p
	osa-miR5158
	osa-miR5812
	osa-miR5488
	osa-miR5517
	osa-miR5810
	osa-miR6245
	osa-miR166c-5p
	osa-miR3981-5p
	osa-miR5337b
	osa-miR1878
	osa-miR1863b
	osa-miR2873c
	osa-miR5157a-3p
	osa-miR5157b-3p
	osa-miR5836
	osa-miR5796
	osa-miR437
	osa-miR5819
	osa-miR5511
	osa-miR6246
	osa-miR5524
	osa-miR1428b
	osa-miR1428c
	osa-miR1428d
	osa-miR2091-3p
	osa-miR2118d
	osa-miR2118g
	osa-miR2878-5p
	osa-miR5149
	osa-miR5535
	osa-miR5822
	osa-miR5832
	osa-miR7693-3p
	osa-miR818f
	osa-miR1437a
	osa-miR528-3p
	osa-miR5823
	osa-miR160f-5p
	osa-miR1861a
	osa-miR1861o
	osa-miR2863a
	osa-miR395u
	osa-miR817
	osa-miR1861g
	osa-miR1862f
	osa-miR1862g
	osa-miR2907a
	osa-miR6251
